# Supplementary material for: Gene Expression in the Salivary Gland of Rhipicephalus (Boophilus) microplus Fed on Tick-Susceptible and Tick-Resistant Hosts
Source: Front Cell Infect Microbiol. 2020 Jan 21;9:477. doi: 10.3389/fcimb.2019.00477 (PMC6985549; doi:10.3389/fcimb.2019.00477)
Supplement: Supplementary file 1 [file Table_1.XLS]

## Sheet: annotation_RmSGL_transcriptome
Sequence Name	Sequence Description	Sequence Length	Blast Hits Count	Blast Min E-Value	Blast Similarity Mean	Blast Hit Description (HSP)	Blast Hit Taxonomy Name	Enzyme Code	Enzyme Name	InterPro Accession
TRINITY_DN100002_c0_g1_i1	nuclear distribution protein NUDC, putative	948	1	2.2E-83	88.72%	gi|241713272|ref|XP_002412088.1|nuclear distribution protein NUDC, putative [Ixodes scapularis]/gi|215505165|gb|EEC14659.1| nuclear distribution protein NUDC, putative [Ixodes scapularis]	Ixodes scapularis/Ixodes scapularis			IPR007052;IPR008978;IPR037898;IPR027761;IPR007052;noIPR;IPR008978
TRINITY_DN100002_c0_g1_i2	nuclear distribution protein NUDC, putative	948	1	3.8E-83	88.21%	gi|241713272|ref|XP_002412088.1|nuclear distribution protein NUDC, putative [Ixodes scapularis]/gi|215505165|gb|EEC14659.1| nuclear distribution protein NUDC, putative [Ixodes scapularis]	Ixodes scapularis/Ixodes scapularis			IPR008978;IPR007052;IPR037898;IPR027761;IPR007052;noIPR;IPR008978
TRINITY_DN100004_c0_g1_i1	uncharacterized protein LOC111631847	1142	1	2.3E-58	69.36%	gi|1316172952|ref|XP_023231943.1|uncharacterized protein LOC111631847 [Centruroides sculpturatus]	Centruroides sculpturatus			IPR013783;noIPR;noIPR;IPR007110;IPR036179
TRINITY_DN100004_c0_g1_i2	uncharacterized protein LOC111631847	2001	1	2.2E-64	69.17%	gi|1316172952|ref|XP_023231943.1|uncharacterized protein LOC111631847 [Centruroides sculpturatus]	Centruroides sculpturatus			IPR013783;noIPR;noIPR;IPR007110;IPR036179
TRINITY_DN100004_c0_g1_i4	uncharacterized protein LOC111631847	1509	1	1.7E-64	69.17%	gi|1316172952|ref|XP_023231943.1|uncharacterized protein LOC111631847 [Centruroides sculpturatus]	Centruroides sculpturatus			IPR013783;noIPR;noIPR;IPR007110;IPR036179
TRINITY_DN100004_c0_g1_i5	uncharacterized protein LOC111631847	1173	1	7.0E-63	69.51%	gi|1316172952|ref|XP_023231943.1|uncharacterized protein LOC111631847 [Centruroides sculpturatus]	Centruroides sculpturatus			IPR013783;noIPR;noIPR;IPR007110;IPR036179
TRINITY_DN100004_c0_g1_i6	uncharacterized protein LOC111631847	1383	1	1.5E-64	69.17%	gi|1316172952|ref|XP_023231943.1|uncharacterized protein LOC111631847 [Centruroides sculpturatus]	Centruroides sculpturatus			IPR013783;noIPR;noIPR;IPR007110;IPR036179
TRINITY_DN100004_c0_g1_i7	uncharacterized protein LOC111631847	2004	1	2.2E-64	69.17%	gi|1316172952|ref|XP_023231943.1|uncharacterized protein LOC111631847 [Centruroides sculpturatus]	Centruroides sculpturatus			IPR013783;noIPR;noIPR;IPR007110;IPR036179
TRINITY_DN100005_c3_g2_i1	supervillin, putative	3295	1	2.5E-283	70.92%	gi|241167624|ref|XP_002410114.1|supervillin, putative [Ixodes scapularis]/gi|215494736|gb|EEC04377.1| supervillin, putative [Ixodes scapularis]	Ixodes scapularis/Ixodes scapularis			IPR029006;IPR029006;IPR029006;IPR029006;IPR007123;noIPR;noIPR;noIPR;noIPR;noIPR;IPR007122;IPR015628;noIPR;noIPR;noIPR;noIPR;noIPR;noIPR
TRINITY_DN100005_c3_g2_i2	supervillin, putative	3279	1	2.5E-283	70.92%	gi|241167624|ref|XP_002410114.1|supervillin, putative [Ixodes scapularis]/gi|215494736|gb|EEC04377.1| supervillin, putative [Ixodes scapularis]	Ixodes scapularis/Ixodes scapularis			IPR029006;IPR007123;IPR029006;IPR029006;IPR029006;noIPR;noIPR;noIPR;IPR007122;IPR015628;noIPR;noIPR;noIPR;noIPR;noIPR;noIPR
TRINITY_DN100009_c0_g1_i1	synapsin-like, partial	6438	1	1.3E-153	72.13%	gi|1316158687|ref|XP_023224479.1|synapsin-like, partial [Centruroides sculpturatus]	Centruroides sculpturatus			IPR001359;IPR020897;IPR020898;noIPR;noIPR;IPR013815;noIPR;noIPR;noIPR;noIPR;noIPR;IPR011761;noIPR;IPR016185
TRINITY_DN100009_c0_g1_i2	synapsin-like, partial	6462	1	1.4E-152	71.10%	gi|1316158687|ref|XP_023224479.1|synapsin-like, partial [Centruroides sculpturatus]	Centruroides sculpturatus			IPR001359;IPR020898;noIPR;noIPR;IPR020897;IPR013815;noIPR;noIPR;noIPR;noIPR;noIPR;IPR011761;IPR016185;noIPR
TRINITY_DN100010_c2_g1_i2	phosphoinositide-dependent protein kinase-1	6740	1	3.1E-264	88.16%	gi|345050324|dbj|BAK64411.1|phosphoinositide-dependent protein kinase-1 [Haemaphysalis longicornis]	Haemaphysalis longicornis	EC:2.7.11	Transferring phosphorus-containing groups	IPR011993;noIPR;noIPR;noIPR;IPR000719;IPR033931;noIPR;noIPR;noIPR;noIPR;IPR039046;IPR000719;IPR033931;noIPR;IPR011009;noIPR
TRINITY_DN100010_c2_g1_i3	phosphoinositide-dependent protein kinase-1	6743	1	2.7E-260	86.75%	gi|345050324|dbj|BAK64411.1|phosphoinositide-dependent protein kinase-1 [Haemaphysalis longicornis]	Haemaphysalis longicornis	EC:2.7.11	Transferring phosphorus-containing groups	IPR011993;noIPR;noIPR;noIPR;IPR000719;IPR033931;noIPR;noIPR;noIPR;noIPR;IPR039046;noIPR;IPR000719;IPR033931;noIPR;noIPR;IPR011009
TRINITY_DN100010_c2_g1_i4	phosphoinositide-dependent protein kinase-1	2702	1	8.9E-69	96.32%	gi|345050324|dbj|BAK64411.1|phosphoinositide-dependent protein kinase-1 [Haemaphysalis longicornis]	Haemaphysalis longicornis	EC:2.7.11	Transferring phosphorus-containing groups	IPR033931;IPR011993;noIPR;noIPR;IPR033931;noIPR
TRINITY_DN100010_c2_g1_i5	phosphoinositide-dependent protein kinase-1	4871	1	1.6E-68	96.32%	gi|345050324|dbj|BAK64411.1|phosphoinositide-dependent protein kinase-1 [Haemaphysalis longicornis]	Haemaphysalis longicornis	EC:2.7.11	Transferring phosphorus-containing groups	IPR033931;IPR011993;noIPR;noIPR;IPR033931;noIPR
TRINITY_DN100011_c1_g1_i1	hypothetical protein BSL78_22613	4635	1	2.4E-98	60.34%	gi|1274993230|gb|PIK40527.1|hypothetical protein BSL78_22613 [Apostichopus japonicus]	Apostichopus japonicus			noIPR;IPR000477
TRINITY_DN100011_c1_g1_i2	hypothetical protein BSL78_20628	683	1	1.8E-47	71.43%	gi|1274995413|gb|PIK42526.1|hypothetical protein BSL78_20628 [Apostichopus japonicus]	Apostichopus japonicus			noIPR;noIPR;IPR000477
TRINITY_DN100011_c1_g2_i1	PREDICTED: uncharacterized protein LOC109462296	609	1	6.8E-9	54.46%	gi|1126165232|ref|XP_019614385.1|PREDICTED: uncharacterized protein LOC109462296 [Branchiostoma belcheri]	Branchiostoma belcheri
TRINITY_DN100012_c3_g1_i1	uncharacterized protein LOC106462380 isoform X2	4694	1	2.6E-172	52.51%	gi|1238856910|ref|XP_022245341.1|uncharacterized protein LOC106462380 isoform X2 [Limulus polyphemus]	Limulus polyphemus			noIPR;IPR038222;IPR001251;IPR001667;IPR022181;IPR004097;IPR036865;noIPR;noIPR;noIPR;noIPR;noIPR;noIPR;noIPR;noIPR;noIPR;noIPR;noIPR;noIPR;noIPR;noIPR;noIPR;noIPR;IPR001251;IPR001251;IPR036865;IPR038763
TRINITY_DN100012_c3_g1_i2	uncharacterized protein LOC106462380 isoform X1	1721	1	9.3E-72	92.17%	gi|1238856908|ref|XP_013777762.2|uncharacterized protein LOC106462380 isoform X1 [Limulus polyphemus]	Limulus polyphemus			IPR036865;IPR001251;noIPR;noIPR;IPR001251;IPR001251;IPR036865
TRINITY_DN100012_c3_g1_i3	protein prune homolog 2-like isoform X2	1768	1	3.8E-105	79.94%	gi|926631604|ref|XP_013781538.1|protein prune homolog 2-like isoform X2 [Limulus polyphemus]	Limulus polyphemus			IPR001251;IPR022181;IPR036865;noIPR;noIPR;noIPR;noIPR;noIPR;IPR001251;IPR001251;IPR036865
TRINITY_DN100012_c3_g1_i4	uncharacterized protein LOC106462380 isoform X2	4670	1	3.3E-172	52.78%	gi|1238856910|ref|XP_022245341.1|uncharacterized protein LOC106462380 isoform X2 [Limulus polyphemus]	Limulus polyphemus			noIPR;IPR022181;IPR004097;IPR001667;IPR038222;IPR036865;IPR001251;noIPR;noIPR;noIPR;noIPR;noIPR;noIPR;noIPR;noIPR;noIPR;noIPR;noIPR;noIPR;noIPR;noIPR;IPR001251;IPR001251;IPR038763;IPR036865
TRINITY_DN100012_c3_g1_i5	uncharacterized protein LOC106462380 isoform X2	4706	1	5.7E-172	51.94%	gi|1238856910|ref|XP_022245341.1|uncharacterized protein LOC106462380 isoform X2 [Limulus polyphemus]	Limulus polyphemus			IPR004097;IPR038222;IPR001251;IPR001667;noIPR;IPR022181;IPR036865;noIPR;noIPR;noIPR;noIPR;noIPR;noIPR;noIPR;noIPR;noIPR;noIPR;noIPR;noIPR;noIPR;noIPR;IPR001251;IPR001251;IPR036865;IPR038763
TRINITY_DN100012_c3_g1_i6	exopolyphosphatase PRUNE1-like isoform X1	1385	1	5.4E-78	71.70%	gi|926639046|ref|XP_013785567.1|exopolyphosphatase PRUNE1-like isoform X1 [Limulus polyphemus]	Limulus polyphemus			noIPR;IPR038222;IPR004097;IPR001667;noIPR;noIPR;IPR038763
TRINITY_DN100012_c3_g1_i8	kinesin-related protein 7-like isoform X2	3246	1	5.6E-118	56.44%	gi|1316145576|ref|XP_023217844.1|kinesin-related protein 7-like isoform X2 [Centruroides sculpturatus]	Centruroides sculpturatus			IPR036865;IPR022181;IPR001251;noIPR;noIPR;noIPR;noIPR;noIPR;noIPR;noIPR;noIPR;IPR001251;IPR001251;IPR036865
TRINITY_DN100013_c1_g1_i2	Signal recognition particle protein	1641	1	1.3E-264	96.82%	gi|675382075|gb|KFM74977.1|Signal recognition particle protein, partial [Stegodyphus mimosarum]	Stegodyphus mimosarum	EC:3.6.1.15	Nucleoside-triphosphate phosphatase	IPR006325;IPR013822;IPR000897;IPR004125;noIPR;IPR036891;noIPR;noIPR;IPR022941;IPR022941;IPR027417;IPR036891
TRINITY_DN100014_c2_g1_i1	pyridoxal kinase	1318	1	1.3E-78	73.66%	gi|939641608|ref|XP_014271371.1|PREDICTED: pyridoxal kinase [Halyomorpha halys]	Halyomorpha halys	EC:2.7.1.35	Pyridoxal kinase	IPR029056;IPR013749;IPR004625;noIPR;IPR004625;noIPR;IPR004625;IPR029056
TRINITY_DN100014_c2_g1_i2	pyridoxal kinase	1155	1	1.2E-78	73.66%	gi|939641608|ref|XP_014271371.1|PREDICTED: pyridoxal kinase [Halyomorpha halys]	Halyomorpha halys	EC:2.7.1.35	Pyridoxal kinase	IPR029056;IPR013749;IPR004625;noIPR;IPR004625;noIPR;IPR004625;IPR029056
TRINITY_DN100014_c2_g1_i3	pyridoxal kinase	1332	1	1.4E-78	73.66%	gi|939641608|ref|XP_014271371.1|PREDICTED: pyridoxal kinase [Halyomorpha halys]	Halyomorpha halys	EC:2.7.1.35	Pyridoxal kinase	IPR013749;IPR029056;IPR004625;noIPR;noIPR;IPR004625;IPR004625;IPR029056
TRINITY_DN100014_c4_g1_i1	transcription factor MYB, putative	3701	1	7.2E-130	53.24%	gi|241747540|ref|XP_002414333.1|transcription factor MYB, putative [Ixodes scapularis]/gi|215508187|gb|EEC17641.1| transcription factor MYB, putative [Ixodes scapularis]	Ixodes scapularis/Ixodes scapularis			noIPR;IPR001005;IPR015395;noIPR;noIPR;noIPR;noIPR;noIPR;noIPR;noIPR;noIPR;IPR015495;noIPR;IPR017930;IPR017930;IPR017930;IPR001005;IPR001005;IPR001005;IPR009057;IPR009057
TRINITY_DN100014_c4_g1_i10	transcription factor MYB, putative	1532	1	1.6E-6	79.17%	gi|241747540|ref|XP_002414333.1|transcription factor MYB, putative [Ixodes scapularis]/gi|215508187|gb|EEC17641.1| transcription factor MYB, putative [Ixodes scapularis]	Ixodes scapularis/Ixodes scapularis
TRINITY_DN100014_c4_g1_i11	transcription factor MYB, putative	2897	1	3.5E-95	56.29%	gi|241747540|ref|XP_002414333.1|transcription factor MYB, putative [Ixodes scapularis]/gi|215508187|gb|EEC17641.1| transcription factor MYB, putative [Ixodes scapularis]	Ixodes scapularis/Ixodes scapularis			IPR015395;noIPR;noIPR;noIPR
TRINITY_DN100014_c4_g1_i12	transcription factor MYB, putative	2993	1	8.5E-97	56.79%	gi|241747540|ref|XP_002414333.1|transcription factor MYB, putative [Ixodes scapularis]/gi|215508187|gb|EEC17641.1| transcription factor MYB, putative [Ixodes scapularis]	Ixodes scapularis/Ixodes scapularis			IPR015395;noIPR;noIPR;noIPR
TRINITY_DN100014_c4_g1_i13	transcription factor MYB, putative	3074	1	4.1E-94	54.67%	gi|241747540|ref|XP_002414333.1|transcription factor MYB, putative [Ixodes scapularis]/gi|215508187|gb|EEC17641.1| transcription factor MYB, putative [Ixodes scapularis]	Ixodes scapularis/Ixodes scapularis			IPR015395;noIPR;noIPR;noIPR
TRINITY_DN100014_c4_g1_i2	transcription factor MYB, putative	2921	1	4.9E-97	56.83%	gi|241747540|ref|XP_002414333.1|transcription factor MYB, putative [Ixodes scapularis]/gi|215508187|gb|EEC17641.1| transcription factor MYB, putative [Ixodes scapularis]	Ixodes scapularis/Ixodes scapularis			IPR015395;noIPR;noIPR;noIPR
TRINITY_DN100014_c4_g1_i3	transcription factor MYB, putative	864	1	2.6E-22	85.29%	gi|241747540|ref|XP_002414333.1|transcription factor MYB, putative [Ixodes scapularis]/gi|215508187|gb|EEC17641.1| transcription factor MYB, putative [Ixodes scapularis]	Ixodes scapularis/Ixodes scapularis			noIPR;noIPR;IPR015495;noIPR;IPR017930;IPR001005;IPR009057
TRINITY_DN100014_c4_g1_i4	transcription factor MYB, putative	3782	1	2.6E-127	51.79%	gi|241747540|ref|XP_002414333.1|transcription factor MYB, putative [Ixodes scapularis]/gi|215508187|gb|EEC17641.1| transcription factor MYB, putative [Ixodes scapularis]	Ixodes scapularis/Ixodes scapularis			IPR015395;noIPR;noIPR;noIPR;IPR001005;noIPR;noIPR;noIPR;noIPR;noIPR;noIPR;noIPR;IPR015495;IPR017930;IPR017930;IPR017930;IPR001005;IPR001005;IPR001005;IPR009057;IPR009057
TRINITY_DN100014_c4_g1_i5	transcription factor MYB, putative	2220	1	7.6E-58	59.39%	gi|241747540|ref|XP_002414333.1|transcription factor MYB, putative [Ixodes scapularis]/gi|215508187|gb|EEC17641.1| transcription factor MYB, putative [Ixodes scapularis]	Ixodes scapularis/Ixodes scapularis			IPR015395;noIPR;noIPR
TRINITY_DN100014_c4_g1_i8	transcription factor MYB, putative	2978	1	1.7E-92	54.15%	gi|241747540|ref|XP_002414333.1|transcription factor MYB, putative [Ixodes scapularis]/gi|215508187|gb|EEC17641.1| transcription factor MYB, putative [Ixodes scapularis]	Ixodes scapularis/Ixodes scapularis			IPR015395;noIPR;noIPR;noIPR
TRINITY_DN100014_c4_g1_i9	transcription factor MYB, putative	3106	1	1.3E-95	56.81%	gi|241747540|ref|XP_002414333.1|transcription factor MYB, putative [Ixodes scapularis]/gi|215508187|gb|EEC17641.1| transcription factor MYB, putative [Ixodes scapularis]	Ixodes scapularis/Ixodes scapularis			IPR015395;noIPR;noIPR;noIPR
TRINITY_DN100015_c3_g2_i2	PREDICTED: uncharacterized protein LOC100899715	3642	1	6.4E-155	54.06%	gi|1078807878|ref|XP_003745867.2|PREDICTED: uncharacterized protein LOC100899715 [Galendromus occidentalis]	Galendromus occidentalis			IPR013815;IPR002192;noIPR;noIPR;noIPR;noIPR
TRINITY_DN100015_c3_g2_i3	PREDICTED: uncharacterized protein LOC100899715	3723	1	2.1E-177	54.87%	gi|1078807878|ref|XP_003745867.2|PREDICTED: uncharacterized protein LOC100899715 [Galendromus occidentalis]	Galendromus occidentalis			IPR013815;noIPR;IPR002192;noIPR;noIPR;noIPR
TRINITY_DN100015_c3_g2_i4	PREDICTED: uncharacterized protein LOC100899715	3723	1	6.1E-177	54.87%	gi|1078807878|ref|XP_003745867.2|PREDICTED: uncharacterized protein LOC100899715 [Galendromus occidentalis]	Galendromus occidentalis			IPR013815;noIPR;IPR002192;noIPR;noIPR;noIPR
TRINITY_DN100017_c4_g1_i3	focal adhesion kinase, putative	2326	1	2.0E-69	73.78%	gi|241998718|ref|XP_002434002.1|focal adhesion kinase, putative [Ixodes scapularis]/gi|215495761|gb|EEC05402.1| focal adhesion kinase, putative, partial [Ixodes scapularis]	Ixodes scapularis/Ixodes scapularis	EC:2.7.10	Transferring phosphorus-containing groups	noIPR;IPR005189;noIPR;noIPR;noIPR;noIPR;noIPR;noIPR;noIPR;IPR005189;IPR036137
TRINITY_DN100017_c4_g1_i4	focal adhesion kinase, putative	802	1	6.5E-36	65.83%	gi|241998718|ref|XP_002434002.1|focal adhesion kinase, putative [Ixodes scapularis]/gi|215495761|gb|EEC05402.1| focal adhesion kinase, putative, partial [Ixodes scapularis]	Ixodes scapularis/Ixodes scapularis	EC:2.7.10	Transferring phosphorus-containing groups	noIPR;IPR005189;noIPR;noIPR;noIPR;noIPR;noIPR;noIPR;IPR005189;IPR036137
TRINITY_DN100017_c4_g1_i5	focal adhesion kinase 1	2523	1	1.0E-74	64.67%	gi|1078802507|ref|XP_018494099.1|PREDICTED: LOW QUALITY PROTEIN: focal adhesion kinase 1 [Galendromus occidentalis]	Galendromus occidentalis	EC:2.7.10	Transferring phosphorus-containing groups	IPR005189;noIPR;noIPR;noIPR;noIPR;noIPR;noIPR;noIPR;noIPR;noIPR;noIPR;IPR005189;IPR036137
TRINITY_DN100017_c4_g2_i1	focal adhesion kinase 1	2504	1	1.7E-276	78.23%	gi|1078802507|ref|XP_018494099.1|PREDICTED: LOW QUALITY PROTEIN: focal adhesion kinase 1 [Galendromus occidentalis]	Galendromus occidentalis			IPR001245;noIPR;IPR001245;IPR019748;IPR014352;IPR011993;noIPR;IPR041390;noIPR;noIPR;noIPR;noIPR;noIPR;noIPR;noIPR;noIPR;IPR000719;IPR000299;IPR019748;noIPR;noIPR;IPR035963;IPR011009;noIPR;IPR029071
TRINITY_DN100018_c2_g1_i1	ras GTP-ase activating protein with iq motif, putative	2221	1	2.2E-206	79.20%	gi|241626768|ref|XP_002409710.1|ras GTP-ase activating protein with iq motif, putative [Ixodes scapularis]/gi|215503213|gb|EEC12707.1| ras GTP-ase activating protein with iq motif, putative, partial [Ixodes scapularis]	Ixodes scapularis/Ixodes scapularis			IPR036872;IPR001715;noIPR;noIPR;IPR001715;IPR001715;IPR036872
TRINITY_DN100018_c2_g1_i3	ras GTP-ase activating protein with iq motif, putative	765	1	2.3E-78	76.65%	gi|241626768|ref|XP_002409710.1|ras GTP-ase activating protein with iq motif, putative [Ixodes scapularis]/gi|215503213|gb|EEC12707.1| ras GTP-ase activating protein with iq motif, putative, partial [Ixodes scapularis]	Ixodes scapularis/Ixodes scapularis			noIPR;noIPR
TRINITY_DN100018_c2_g2_i1	ras GTP-ase activating protein with iq motif, putative	3905	1	0.0E0	79.62%	gi|241626768|ref|XP_002409710.1|ras GTP-ase activating protein with iq motif, putative [Ixodes scapularis]/gi|215503213|gb|EEC12707.1| ras GTP-ase activating protein with iq motif, putative, partial [Ixodes scapularis]	Ixodes scapularis/Ixodes scapularis			IPR001936;IPR000048;noIPR;IPR000593;noIPR;IPR000048;IPR000048;IPR001936;IPR000048;IPR000048;noIPR;IPR008936
TRINITY_DN100018_c2_g2_i2	ras GTP-ase activating protein with iq motif, putative	3760	1	0.0E0	79.54%	gi|241626768|ref|XP_002409710.1|ras GTP-ase activating protein with iq motif, putative [Ixodes scapularis]/gi|215503213|gb|EEC12707.1| ras GTP-ase activating protein with iq motif, putative, partial [Ixodes scapularis]	Ixodes scapularis/Ixodes scapularis			IPR000593;IPR000048;IPR001936;noIPR;noIPR;IPR000048;IPR000048;IPR000048;IPR001936;IPR000048;noIPR;IPR008936
TRINITY_DN100019_c2_g1_i1	G protein-coupled receptor kinase 1-like isoform X1	7127	1	0.0E0	94.36%	gi|1316164643|ref|XP_023227629.1|G protein-coupled receptor kinase 1-like isoform X1 [Centruroides sculpturatus]	Centruroides sculpturatus	EC:2.7.11;EC:2.7.11.16	Transferring phosphorus-containing groups;[G-protein-coupled receptor] kinase	IPR000239;noIPR;IPR016137;IPR011993;IPR000719;noIPR;noIPR;noIPR;noIPR;noIPR;IPR000719;IPR016137;IPR000961;noIPR;noIPR;IPR036305;IPR011009;noIPR
TRINITY_DN100019_c2_g1_i2	cAMP-dependent protein kinase catalytic subunit, putative	5226	1	7.3E-35	91.49%	gi|241604702|ref|XP_002405936.1|cAMP-dependent protein kinase catalytic subunit, putative [Ixodes scapularis]/gi|215502597|gb|EEC12091.1| cAMP-dependent protein kinase catalytic subunit, putative, partial [Ixodes scapularis]	Ixodes scapularis/Ixodes scapularis	EC:2.7.11;EC:2.7.11.16	Transferring phosphorus-containing groups;[G-protein-coupled receptor] kinase	noIPR
TRINITY_DN100019_c2_g1_i3	G protein-coupled receptor kinase 1-like isoform X1	7173	1	0.0E0	94.36%	gi|1316164643|ref|XP_023227629.1|G protein-coupled receptor kinase 1-like isoform X1 [Centruroides sculpturatus]	Centruroides sculpturatus	EC:2.7.11;EC:2.7.11.16	Transferring phosphorus-containing groups;[G-protein-coupled receptor] kinase	IPR000239;noIPR;IPR016137;IPR011993;IPR000719;noIPR;noIPR;noIPR;noIPR;noIPR;IPR000719;IPR016137;IPR000961;noIPR;noIPR;IPR036305;IPR011009;noIPR
TRINITY_DN100020_c5_g1_i1	leucine rich domain-containing protein, putative	4475	1	5.7E-137	86.87%	gi|241672381|ref|XP_002411477.1|leucine rich domain-containing protein, putative [Ixodes scapularis]/gi|215504131|gb|EEC13625.1| leucine rich domain-containing protein, putative, partial [Ixodes scapularis]	Ixodes scapularis/Ixodes scapularis			IPR036705;IPR001611;IPR032675;IPR005502;noIPR;noIPR;IPR001611;IPR001611;IPR001611;IPR001611;IPR001611;IPR036705;noIPR
TRINITY_DN100020_c5_g1_i2	leucine rich domain-containing protein, putative	4473	1	5.7E-137	86.87%	gi|241672381|ref|XP_002411477.1|leucine rich domain-containing protein, putative [Ixodes scapularis]/gi|215504131|gb|EEC13625.1| leucine rich domain-containing protein, putative, partial [Ixodes scapularis]	Ixodes scapularis/Ixodes scapularis			IPR036705;IPR001611;IPR032675;IPR005502;noIPR;noIPR;IPR001611;IPR001611;IPR001611;IPR001611;IPR001611;IPR036705;noIPR
TRINITY_DN100020_c5_g1_i3	uncharacterized protein LOC106467938 isoform X1	2908	1	1.1E-53	63.12%	gi|1238876815|ref|XP_022251874.1|uncharacterized protein LOC106467938 isoform X1 [Limulus polyphemus]/gi|1238876817|ref|XP_022251875.1| uncharacterized protein LOC106467938 isoform X1 [Limulus polyphemus]	Limulus polyphemus/Limulus polyphemus			IPR005502;IPR036705;noIPR;noIPR;IPR036705
TRINITY_DN100020_c5_g1_i4	uncharacterized protein LOC106467938 isoform X1	2936	1	2.9E-57	63.47%	gi|1238876815|ref|XP_022251874.1|uncharacterized protein LOC106467938 isoform X1 [Limulus polyphemus]/gi|1238876817|ref|XP_022251875.1| uncharacterized protein LOC106467938 isoform X1 [Limulus polyphemus]	Limulus polyphemus/Limulus polyphemus			IPR036705;IPR005502;noIPR;noIPR;IPR036705
TRINITY_DN100020_c5_g1_i7	leucine rich domain-containing protein, putative	4476	1	5.7E-137	86.87%	gi|241672381|ref|XP_002411477.1|leucine rich domain-containing protein, putative [Ixodes scapularis]/gi|215504131|gb|EEC13625.1| leucine rich domain-containing protein, putative, partial [Ixodes scapularis]	Ixodes scapularis/Ixodes scapularis			IPR036705;IPR001611;IPR032675;IPR005502;noIPR;noIPR;IPR001611;IPR001611;IPR001611;IPR001611;IPR001611;IPR036705;noIPR
TRINITY_DN100021_c3_g1_i1	conserved hypothetical protein	7111	1	1.9E-275	74.24%	gi|241236718|ref|XP_002400921.1|conserved hypothetical protein [Ixodes scapularis]/gi|215496100|gb|EEC05741.1| conserved hypothetical protein, partial [Ixodes scapularis]	Ixodes scapularis/Ixodes scapularis			IPR000904;noIPR;IPR023394;IPR011993;IPR033742;noIPR;noIPR;noIPR;noIPR;noIPR;noIPR;IPR000904;IPR000048;IPR000904;noIPR;IPR035999
TRINITY_DN100021_c3_g1_i2	conserved hypothetical protein	1734	1	4.1E-200	78.10%	gi|241236718|ref|XP_002400921.1|conserved hypothetical protein [Ixodes scapularis]/gi|215496100|gb|EEC05741.1| conserved hypothetical protein, partial [Ixodes scapularis]	Ixodes scapularis/Ixodes scapularis			IPR033742;IPR023394;IPR000904;noIPR;IPR011993;noIPR;noIPR;noIPR;noIPR;noIPR;noIPR;IPR000904;IPR000048;IPR000904;IPR035999;noIPR
TRINITY_DN100021_c3_g1_i3	conserved hypothetical protein	2242	1	5.8E-66	68.38%	gi|241236718|ref|XP_002400921.1|conserved hypothetical protein [Ixodes scapularis]/gi|215496100|gb|EEC05741.1| conserved hypothetical protein, partial [Ixodes scapularis]	Ixodes scapularis/Ixodes scapularis			IPR033742;IPR011993;noIPR;noIPR;noIPR;IPR030737;noIPR
TRINITY_DN100021_c3_g1_i4	conserved hypothetical protein	6946	1	1.8E-283	79.95%	gi|241236718|ref|XP_002400921.1|conserved hypothetical protein [Ixodes scapularis]/gi|215496100|gb|EEC05741.1| conserved hypothetical protein, partial [Ixodes scapularis]	Ixodes scapularis/Ixodes scapularis			IPR033742;noIPR;IPR023394;IPR011993;IPR000904;noIPR;noIPR;noIPR;noIPR;noIPR;noIPR;noIPR;noIPR;noIPR;IPR000904;IPR000048;IPR000904;IPR033742;noIPR;IPR035999
TRINITY_DN100021_c3_g1_i5	conserved hypothetical protein	7087	1	1.9E-275	74.24%	gi|241236718|ref|XP_002400921.1|conserved hypothetical protein [Ixodes scapularis]/gi|215496100|gb|EEC05741.1| conserved hypothetical protein, partial [Ixodes scapularis]	Ixodes scapularis/Ixodes scapularis			IPR000904;noIPR;IPR023394;IPR011993;IPR033742;noIPR;noIPR;noIPR;noIPR;noIPR;noIPR;IPR000904;IPR000048;IPR000904;noIPR;IPR035999
TRINITY_DN100021_c3_g1_i6	conserved hypothetical protein	6922	1	1.8E-283	79.95%	gi|241236718|ref|XP_002400921.1|conserved hypothetical protein [Ixodes scapularis]/gi|215496100|gb|EEC05741.1| conserved hypothetical protein, partial [Ixodes scapularis]	Ixodes scapularis/Ixodes scapularis			IPR033742;noIPR;IPR023394;IPR011993;IPR000904;noIPR;noIPR;noIPR;noIPR;noIPR;noIPR;noIPR;noIPR;noIPR;IPR000904;IPR000048;IPR000904;IPR033742;noIPR;IPR035999
TRINITY_DN100021_c3_g1_i7	conserved hypothetical protein	3790	1	7.3E-279	82.21%	gi|241236718|ref|XP_002400921.1|conserved hypothetical protein [Ixodes scapularis]/gi|215496100|gb|EEC05741.1| conserved hypothetical protein, partial [Ixodes scapularis]	Ixodes scapularis/Ixodes scapularis			noIPR;IPR011993;IPR000904;IPR023394;IPR033742;noIPR;noIPR;noIPR;noIPR;noIPR;noIPR;noIPR;noIPR;noIPR;IPR000048;IPR000904;IPR000904;IPR033742;IPR035999;noIPR
TRINITY_DN100021_c3_g1_i8	conserved hypothetical protein	1880	1	2.3E-63	93.29%	gi|241236718|ref|XP_002400921.1|conserved hypothetical protein [Ixodes scapularis]/gi|215496100|gb|EEC05741.1| conserved hypothetical protein, partial [Ixodes scapularis]	Ixodes scapularis/Ixodes scapularis			IPR033742;IPR011993;noIPR;noIPR;noIPR;noIPR;noIPR
TRINITY_DN100023_c0_g1_i3	ubiquitin-like modifier-activating enzyme 1	1074	1	1.4E-57	84.34%	gi|913314807|ref|XP_013188250.1|PREDICTED: ubiquitin-like modifier-activating enzyme 1 [Amyelois transitella]	Amyelois transitella			noIPR;IPR018965;IPR038252;noIPR;noIPR;IPR035985
TRINITY_DN100023_c0_g1_i5	ubiquitin-like modifier-activating enzyme 1	590	1	5.8E-58	84.34%	gi|913314807|ref|XP_013188250.1|PREDICTED: ubiquitin-like modifier-activating enzyme 1 [Amyelois transitella]	Amyelois transitella			noIPR;IPR018965;IPR038252;noIPR;noIPR;IPR035985
TRINITY_DN100023_c0_g1_i8	ubiquitin-like modifier-activating enzyme 1	687	1	6.8E-58	84.34%	gi|913314807|ref|XP_013188250.1|PREDICTED: ubiquitin-like modifier-activating enzyme 1 [Amyelois transitella]	Amyelois transitella			noIPR;IPR018965;IPR038252;noIPR;noIPR;IPR035985
TRINITY_DN100023_c1_g2_i1	ubiquitin-activating enzyme E1, putative	902	1	7.2E-124	82.74%	gi|242004214|ref|XP_002436276.1|ubiquitin-activating enzyme E1, putative [Ixodes scapularis]/gi|215499612|gb|EEC09106.1| ubiquitin-activating enzyme E1, putative, partial [Ixodes scapularis]	Ixodes scapularis/Ixodes scapularis			IPR000011;IPR000594;noIPR;IPR019572;noIPR;noIPR;noIPR;IPR035985
TRINITY_DN100023_c1_g2_i2	ubiquitin-activating enzyme E1, putative	902	1	4.6E-123	82.08%	gi|242004214|ref|XP_002436276.1|ubiquitin-activating enzyme E1, putative [Ixodes scapularis]/gi|215499612|gb|EEC09106.1| ubiquitin-activating enzyme E1, putative, partial [Ixodes scapularis]	Ixodes scapularis/Ixodes scapularis			IPR000011;IPR019572;noIPR;IPR000594;noIPR;noIPR;noIPR;IPR035985
TRINITY_DN100023_c1_g2_i3	ubiquitin-like modifier-activating enzyme 1	649	1	9.6E-38	90.53%	gi|1137514179|ref|XP_019907070.1|PREDICTED: LOW QUALITY PROTEIN: ubiquitin-like modifier-activating enzyme 1 [Esox lucius]	Esox lucius			noIPR;IPR000594;IPR019572;noIPR;noIPR;IPR035985
TRINITY_DN100026_c2_g1_i1	conserved hypothetical protein	1353	1	1.9E-91	72.73%	gi|242003122|ref|XP_002436132.1|conserved hypothetical protein [Ixodes scapularis]/gi|215499468|gb|EEC08962.1| conserved hypothetical protein [Ixodes scapularis]	Ixodes scapularis/Ixodes scapularis	EC:3.1.3.4	Phosphatidate phosphatase	IPR000326;noIPR;noIPR;noIPR;IPR036938
TRINITY_DN100026_c2_g1_i3	conserved hypothetical protein	1071	1	9.5E-83	73.72%	gi|242003122|ref|XP_002436132.1|conserved hypothetical protein [Ixodes scapularis]/gi|215499468|gb|EEC08962.1| conserved hypothetical protein [Ixodes scapularis]	Ixodes scapularis/Ixodes scapularis	EC:3.1.3.4	Phosphatidate phosphatase	noIPR;IPR000326;noIPR;noIPR;IPR036938
TRINITY_DN100026_c2_g1_i4	conserved hypothetical protein	2537	1	3.5E-91	72.73%	gi|242003122|ref|XP_002436132.1|conserved hypothetical protein [Ixodes scapularis]/gi|215499468|gb|EEC08962.1| conserved hypothetical protein [Ixodes scapularis]	Ixodes scapularis/Ixodes scapularis	EC:3.1.3.4	Phosphatidate phosphatase	IPR000326;noIPR;noIPR;noIPR;IPR036938
TRINITY_DN100026_c2_g1_i5	conserved hypothetical protein	1795	1	2.5E-91	72.73%	gi|242003122|ref|XP_002436132.1|conserved hypothetical protein [Ixodes scapularis]/gi|215499468|gb|EEC08962.1| conserved hypothetical protein [Ixodes scapularis]	Ixodes scapularis/Ixodes scapularis	EC:3.1.3.4	Phosphatidate phosphatase	IPR000326;noIPR;noIPR;noIPR;IPR036938
TRINITY_DN100028_c1_g1_i1	RNA-directed DNA polymerase from mobile element jockey-like	3952	1	1.0E-113	51.89%	gi|780003694|ref|XP_011683696.1|PREDICTED: RNA-directed DNA polymerase from mobile element jockey-like [Strongylocentrotus purpuratus]	Strongylocentrotus purpuratus			IPR005135;IPR036691;IPR000477;noIPR;IPR000477;noIPR;noIPR;IPR036691
TRINITY_DN100028_c1_g1_i2	RNA-directed DNA polymerase from mobile element jockey-like	3940	1	1.0E-113	51.89%	gi|780003694|ref|XP_011683696.1|PREDICTED: RNA-directed DNA polymerase from mobile element jockey-like [Strongylocentrotus purpuratus]	Strongylocentrotus purpuratus			IPR005135;IPR000477;IPR036691;noIPR;IPR000477;noIPR;noIPR;IPR036691
TRINITY_DN100029_c2_g1_i1	hypothetical protein CAPTEDRAFT_215706	681	1	1.1E-12	65.98%	gi|443689747|gb|ELT92072.1|hypothetical protein CAPTEDRAFT_215706 [Capitella teleta]	Capitella teleta			IPR036691;IPR036691
TRINITY_DN100029_c2_g2_i1	RNA-directed DNA polymerase from mobile element jockey-like	1351	1	3.1E-78	56.06%	gi|1005420826|ref|XP_015758992.1|PREDICTED: RNA-directed DNA polymerase from mobile element jockey-like [Acropora digitifera]	Acropora digitifera			IPR000477;noIPR;IPR000477;noIPR;noIPR
TRINITY_DN100031_c1_g1_i1	cytochrome P450 2J6-like	1916	1	5.2E-132	68.67%	gi|1253687854|ref|XP_022647409.1|cytochrome P450 2J6-like isoform X2 [Varroa destructor]/gi|1268076173|ref|XP_022709091.1| cytochrome P450 2J6-like [Varroa jacobsoni]/gi|1268076175|ref|XP_022709092.1| cytochrome P450 2J6-like [Varroa jacobsoni]/gi|1268076177|ref|XP_022709093.1| cytochrome P450 2J6-like [Varroa jacobsoni]/gi|1268076179|ref|XP_022709094.1| cytochrome P450 2J6-like [Varroa jacobsoni…	Varroa destructor/Varroa jacobsoni/Varroa jacobsoni/Varroa jacobsoni/Varroa jacobsoni/Varroa jacobsoni/Varroa jacobsoni			IPR002401;IPR001128;IPR036396;IPR001128;noIPR;noIPR;IPR036396
TRINITY_DN100031_c1_g1_i4	cytochrome P450 2J6-like	1980	1	5.4E-132	68.67%	gi|1253687854|ref|XP_022647409.1|cytochrome P450 2J6-like isoform X2 [Varroa destructor]/gi|1268076173|ref|XP_022709091.1| cytochrome P450 2J6-like [Varroa jacobsoni]/gi|1268076175|ref|XP_022709092.1| cytochrome P450 2J6-like [Varroa jacobsoni]/gi|1268076177|ref|XP_022709093.1| cytochrome P450 2J6-like [Varroa jacobsoni]/gi|1268076179|ref|XP_022709094.1| cytochrome P450 2J6-like [Varroa jacobsoni…	Varroa destructor/Varroa jacobsoni/Varroa jacobsoni/Varroa jacobsoni/Varroa jacobsoni/Varroa jacobsoni/Varroa jacobsoni			IPR002401;IPR001128;IPR036396;IPR001128;noIPR;noIPR;IPR036396
TRINITY_DN100031_c1_g1_i5	cytochrome P450 2J6-like	1980	1	5.4E-132	68.67%	gi|1253687854|ref|XP_022647409.1|cytochrome P450 2J6-like isoform X2 [Varroa destructor]/gi|1268076173|ref|XP_022709091.1| cytochrome P450 2J6-like [Varroa jacobsoni]/gi|1268076175|ref|XP_022709092.1| cytochrome P450 2J6-like [Varroa jacobsoni]/gi|1268076177|ref|XP_022709093.1| cytochrome P450 2J6-like [Varroa jacobsoni]/gi|1268076179|ref|XP_022709094.1| cytochrome P450 2J6-like [Varroa jacobsoni…	Varroa destructor/Varroa jacobsoni/Varroa jacobsoni/Varroa jacobsoni/Varroa jacobsoni/Varroa jacobsoni/Varroa jacobsoni			IPR002401;IPR001128;IPR036396;IPR001128;noIPR;noIPR;IPR036396
TRINITY_DN100033_c3_g2_i1	SAC domain-containing protein, putative	1931	1	1.4E-169	86.44%	gi|242000534|ref|XP_002434910.1|SAC domain-containing protein, putative [Ixodes scapularis]/gi|215498240|gb|EEC07734.1| SAC domain-containing protein, putative, partial [Ixodes scapularis]	Ixodes scapularis/Ixodes scapularis			IPR002013;noIPR;noIPR;IPR002013
TRINITY_DN100033_c3_g2_i10	SAC domain-containing protein, putative	2449	1	1.9E-174	87.77%	gi|242000534|ref|XP_002434910.1|SAC domain-containing protein, putative [Ixodes scapularis]/gi|215498240|gb|EEC07734.1| SAC domain-containing protein, putative, partial [Ixodes scapularis]	Ixodes scapularis/Ixodes scapularis			IPR002013;noIPR;noIPR;IPR002013
TRINITY_DN100033_c3_g2_i2	SAC domain-containing protein, putative	556	1	2.5E-50	82.43%	gi|242000534|ref|XP_002434910.1|SAC domain-containing protein, putative [Ixodes scapularis]/gi|215498240|gb|EEC07734.1| SAC domain-containing protein, putative, partial [Ixodes scapularis]	Ixodes scapularis/Ixodes scapularis			IPR002013;noIPR;noIPR
TRINITY_DN100033_c3_g2_i3	SAC domain-containing protein, putative	1450	1	3.9E-180	86.33%	gi|242000534|ref|XP_002434910.1|SAC domain-containing protein, putative [Ixodes scapularis]/gi|215498240|gb|EEC07734.1| SAC domain-containing protein, putative, partial [Ixodes scapularis]	Ixodes scapularis/Ixodes scapularis			IPR002013;noIPR;noIPR;IPR002013
TRINITY_DN100033_c3_g2_i4	SAC domain-containing protein, putative	1158	1	5.8E-86	90.27%	gi|242000534|ref|XP_002434910.1|SAC domain-containing protein, putative [Ixodes scapularis]/gi|215498240|gb|EEC07734.1| SAC domain-containing protein, putative, partial [Ixodes scapularis]	Ixodes scapularis/Ixodes scapularis			noIPR;noIPR;IPR002013
TRINITY_DN100033_c3_g2_i7	SAC domain-containing protein, putative	1460	1	2.3E-196	87.92%	gi|242000534|ref|XP_002434910.1|SAC domain-containing protein, putative [Ixodes scapularis]/gi|215498240|gb|EEC07734.1| SAC domain-containing protein, putative, partial [Ixodes scapularis]	Ixodes scapularis/Ixodes scapularis			IPR002013;noIPR;noIPR;IPR002013
TRINITY_DN100033_c3_g2_i8	SAC domain-containing protein, putative	570	1	2.4E-64	78.57%	gi|242000534|ref|XP_002434910.1|SAC domain-containing protein, putative [Ixodes scapularis]/gi|215498240|gb|EEC07734.1| SAC domain-containing protein, putative, partial [Ixodes scapularis]	Ixodes scapularis/Ixodes scapularis			noIPR;noIPR;IPR002013
TRINITY_DN100033_c3_g2_i9	SAC domain-containing protein, putative	2450	1	1.9E-174	87.77%	gi|242000534|ref|XP_002434910.1|SAC domain-containing protein, putative [Ixodes scapularis]/gi|215498240|gb|EEC07734.1| SAC domain-containing protein, putative, partial [Ixodes scapularis]	Ixodes scapularis/Ixodes scapularis			IPR002013;noIPR;noIPR;IPR002013
TRINITY_DN100034_c2_g1_i1	G-protein coupled receptor 161-like	5336	1	2.7E-85	52.21%	gi|1316144361|ref|XP_023217199.1|G-protein coupled receptor 161-like [Centruroides sculpturatus]	Centruroides sculpturatus			IPR000276;noIPR;IPR000276;noIPR;noIPR;noIPR;noIPR;noIPR;noIPR;IPR017452;noIPR;noIPR
TRINITY_DN100034_c2_g1_i3	G-protein coupled receptor 161-like	7002	1	3.5E-85	52.21%	gi|1316144361|ref|XP_023217199.1|G-protein coupled receptor 161-like [Centruroides sculpturatus]	Centruroides sculpturatus			IPR000276;noIPR;IPR000276;noIPR;noIPR;noIPR;noIPR;noIPR;noIPR;IPR017452;noIPR;noIPR
TRINITY_DN100035_c5_g1_i1	hypothetical protein IscW_ISCW004021	3826	1	2.3E-62	76.92%	gi|241260134|ref|XP_002404922.1|hypothetical protein IscW_ISCW004021 [Ixodes scapularis]/gi|215496731|gb|EEC06371.1| hypothetical protein IscW_ISCW004021 [Ixodes scapularis]	Ixodes scapularis/Ixodes scapularis			IPR029058;IPR010463;noIPR;noIPR;IPR029058
TRINITY_DN100035_c5_g1_i3	hypothetical protein IscW_ISCW004021	3828	1	2.3E-62	76.92%	gi|241260134|ref|XP_002404922.1|hypothetical protein IscW_ISCW004021 [Ixodes scapularis]/gi|215496731|gb|EEC06371.1| hypothetical protein IscW_ISCW004021 [Ixodes scapularis]	Ixodes scapularis/Ixodes scapularis			IPR029058;IPR010463;noIPR;noIPR;noIPR;IPR029058
TRINITY_DN100036_c4_g2_i1	elongation of very long chain fatty acids protein AAEL008004-like isoform X1	2208	1	1.7E-46	60.93%	gi|1253699614|ref|XP_022649022.1|elongation of very long chain fatty acids protein AAEL008004-like isoform X1 [Varroa destructor]	Varroa destructor			IPR002076;noIPR;noIPR;IPR002076;noIPR
TRINITY_DN100036_c4_g2_i3	elongation of very long chain fatty acids protein AAEL008004-like isoform X1	1683	1	2.2E-73	69.14%	gi|1253699614|ref|XP_022649022.1|elongation of very long chain fatty acids protein AAEL008004-like isoform X1 [Varroa destructor]	Varroa destructor			IPR002076;noIPR;noIPR;IPR002076;noIPR
TRINITY_DN100037_c0_g1_i1	uncharacterized protein K02A2.6-like	2830	1	6.9E-197	67.34%	gi|1188080210|ref|XP_020786885.1|uncharacterized protein K02A2.6-like [Boleophthalmus pectinirostris]	Boleophthalmus pectinirostris			noIPR;IPR000477;noIPR;IPR041577;IPR041588;IPR036397;noIPR;noIPR;IPR001584;noIPR;noIPR;noIPR;noIPR;noIPR;IPR001584;IPR000477;noIPR;IPR012337;noIPR
TRINITY_DN100039_c5_g2_i1	TRPL translocation defect protein 14-like isoform X2	3600	1	2.4E-170	83.29%	gi|1316153999|ref|XP_023222018.1|TRPL translocation defect protein 14-like isoform X2 [Centruroides sculpturatus]	Centruroides sculpturatus			noIPR;IPR038727;noIPR;IPR027417;IPR033469
TRINITY_DN100039_c5_g2_i2	TRPL translocation defect protein 14-like isoform X2	2011	1	1.3E-170	83.29%	gi|1316153999|ref|XP_023222018.1|TRPL translocation defect protein 14-like isoform X2 [Centruroides sculpturatus]	Centruroides sculpturatus			noIPR;IPR038727;noIPR;IPR027417;IPR033469
TRINITY_DN100039_c5_g2_i3	TRPL translocation defect protein 14-like isoform X1	2182	1	8.5E-163	72.00%	gi|1316153997|ref|XP_023222017.1|TRPL translocation defect protein 14-like isoform X1 [Centruroides sculpturatus]	Centruroides sculpturatus			IPR038727;noIPR;noIPR;IPR033469
TRINITY_DN100040_c3_g1_i1	protein downstream neighbor of Son, putative	4727	1	3.9E-152	76.04%	gi|241829652|ref|XP_002414767.1|protein downstream neighbor of Son, putative [Ixodes scapularis]/gi|215508979|gb|EEC18432.1| protein downstream neighbor of Son, putative [Ixodes scapularis]	Ixodes scapularis/Ixodes scapularis			IPR024861;noIPR;noIPR;noIPR;noIPR;IPR024861
TRINITY_DN100040_c3_g1_i2	protein downstream neighbor of Son, putative	4612	1	3.8E-152	76.04%	gi|241829652|ref|XP_002414767.1|protein downstream neighbor of Son, putative [Ixodes scapularis]/gi|215508979|gb|EEC18432.1| protein downstream neighbor of Son, putative [Ixodes scapularis]	Ixodes scapularis/Ixodes scapularis			IPR024861;noIPR;noIPR;noIPR;noIPR;IPR024861
TRINITY_DN100040_c3_g1_i3	protein downstream neighbor of Son, putative	4727	1	3.9E-152	76.04%	gi|241829652|ref|XP_002414767.1|protein downstream neighbor of Son, putative [Ixodes scapularis]/gi|215508979|gb|EEC18432.1| protein downstream neighbor of Son, putative [Ixodes scapularis]	Ixodes scapularis/Ixodes scapularis			IPR024861;noIPR;noIPR;noIPR;noIPR;IPR024861
TRINITY_DN100041_c0_g1_i1	Man2a1	2122	1	6.1E-65	62.81%	gi|1355989298|gb|PRD31916.1|Man2a1 [Nephila clavipes]	Nephila clavipes	EC:3.2.1.24	Alpha-mannosidase	IPR011682;noIPR;noIPR;noIPR;noIPR;IPR011013
TRINITY_DN100041_c0_g1_i3	Man2a1	2192	1	6.3E-65	62.81%	gi|1355989298|gb|PRD31916.1|Man2a1 [Nephila clavipes]	Nephila clavipes	EC:3.2.1.24	Alpha-mannosidase	IPR011682;noIPR;noIPR;noIPR;noIPR;IPR011013
TRINITY_DN100041_c0_g1_i4	Man2a1	2172	1	6.3E-65	62.81%	gi|1355989298|gb|PRD31916.1|Man2a1 [Nephila clavipes]	Nephila clavipes	EC:3.2.1.24	Alpha-mannosidase	IPR011682;noIPR;noIPR;noIPR;noIPR;IPR011013
TRINITY_DN100041_c1_g1_i1	alpha-mannosidase 2-like	655	1	5.3E-68	74.42%	gi|1238879287|ref|XP_022252831.1|alpha-mannosidase 2-like [Limulus polyphemus]	Limulus polyphemus	EC:3.2.1.24	Alpha-mannosidase	IPR037094;IPR015341;IPR013780;noIPR;noIPR;IPR028995;IPR011013
TRINITY_DN100041_c1_g1_i2	alpha-mannosidase, putative	2347	1	3.3E-229	82.39%	gi|241681358|ref|XP_002411585.1|alpha-mannosidase, putative [Ixodes scapularis]/gi|215504324|gb|EEC13818.1| alpha-mannosidase, putative, partial [Ixodes scapularis]	Ixodes scapularis/Ixodes scapularis	EC:3.2.1.24	Alpha-mannosidase	IPR013780;IPR027291;IPR015341;IPR037094;IPR000602;noIPR;noIPR;IPR011013;IPR011330;IPR028995
TRINITY_DN100041_c1_g1_i3	alpha-mannosidase 2-like	532	1	5.4E-55	75.29%	gi|1238879287|ref|XP_022252831.1|alpha-mannosidase 2-like [Limulus polyphemus]	Limulus polyphemus	EC:3.2.1.24	Alpha-mannosidase	IPR037094;IPR015341;noIPR;noIPR;IPR028995
TRINITY_DN100041_c1_g2_i1	alpha-mannosidase, putative	509	1	1.8E-55	81.66%	gi|241681358|ref|XP_002411585.1|alpha-mannosidase, putative [Ixodes scapularis]/gi|215504324|gb|EEC13818.1| alpha-mannosidase, putative, partial [Ixodes scapularis]	Ixodes scapularis/Ixodes scapularis	EC:3.2.1.24	Alpha-mannosidase	noIPR;IPR011682;noIPR;noIPR;IPR011013
TRINITY_DN100042_c2_g1_i1	integrator complex subunit, putative	6701	1	0.0E0	90.56%	gi|242001668|ref|XP_002435477.1|integrator complex subunit, putative [Ixodes scapularis]/gi|215498813|gb|EEC08307.1| integrator complex subunit, putative [Ixodes scapularis]	Ixodes scapularis/Ixodes scapularis			IPR022145;noIPR;noIPR;noIPR;noIPR;IPR038902
TRINITY_DN100042_c2_g1_i2	integrator complex subunit, putative	6731	1	0.0E0	90.56%	gi|242001668|ref|XP_002435477.1|integrator complex subunit, putative [Ixodes scapularis]/gi|215498813|gb|EEC08307.1| integrator complex subunit, putative [Ixodes scapularis]	Ixodes scapularis/Ixodes scapularis			IPR022145;noIPR;noIPR;noIPR;noIPR;IPR038902
TRINITY_DN100043_c4_g1_i1	uncharacterized protein LOC111853013	1001	1	6.9E-19	56.25%	gi|1338776998|ref|XP_023685205.1|uncharacterized protein LOC111853013 [Paramormyrops kingsleyae]	Paramormyrops kingsleyae
TRINITY_DN100043_c4_g4_i1	uncharacterized protein LOC111844479	1580	1	4.1E-34	50.27%	gi|1338745580|ref|XP_023668756.1|uncharacterized protein LOC111844479 [Paramormyrops kingsleyae]	Paramormyrops kingsleyae
TRINITY_DN100044_c4_g1_i3	protein LZIC, putative	4065	1	4.9E-71	92.02%	gi|241695308|ref|XP_002413048.1|protein LZIC, putative [Ixodes scapularis]/gi|215506862|gb|EEC16356.1| protein LZIC, putative [Ixodes scapularis]	Ixodes scapularis/Ixodes scapularis			IPR036911;IPR009428;IPR040065;noIPR;IPR036911
TRINITY_DN100044_c4_g1_i4	protein LZIC, putative	4091	1	4.9E-71	92.02%	gi|241695308|ref|XP_002413048.1|protein LZIC, putative [Ixodes scapularis]/gi|215506862|gb|EEC16356.1| protein LZIC, putative [Ixodes scapularis]	Ixodes scapularis/Ixodes scapularis			IPR036911;IPR009428;IPR040065;noIPR;IPR036911
TRINITY_DN100044_c4_g1_i6	protein LZIC, putative	4047	1	4.9E-71	92.02%	gi|241695308|ref|XP_002413048.1|protein LZIC, putative [Ixodes scapularis]/gi|215506862|gb|EEC16356.1| protein LZIC, putative [Ixodes scapularis]	Ixodes scapularis/Ixodes scapularis			IPR036911;IPR009428;IPR040065;noIPR;IPR036911
TRINITY_DN100044_c4_g1_i7	protein LZIC, putative	4073	1	4.9E-71	92.02%	gi|241695308|ref|XP_002413048.1|protein LZIC, putative [Ixodes scapularis]/gi|215506862|gb|EEC16356.1| protein LZIC, putative [Ixodes scapularis]	Ixodes scapularis/Ixodes scapularis			IPR036911;IPR009428;IPR040065;noIPR;IPR036911
TRINITY_DN100046_c1_g1_i1	multiple ankyrin repeats single kh domain protein, putative	2628	1	2.1E-46	73.26%	gi|241596155|ref|XP_002404523.1|multiple ankyrin repeats single kh domain protein, putative [Ixodes scapularis]/gi|215500429|gb|EEC09923.1| multiple ankyrin repeats single kh domain protein, putative, partial [Ixodes scapularis]	Ixodes scapularis/Ixodes scapularis			IPR002110;IPR036770;IPR020683;IPR036770;IPR036770;IPR036770;IPR036770;noIPR;noIPR;noIPR;noIPR;noIPR;noIPR;noIPR;noIPR;IPR002110;IPR002110;IPR002110;IPR002110;IPR002110;IPR020683;IPR002110;IPR002110;IPR002110;IPR002110;IPR002110;IPR002110;IPR020683;IPR020683;IPR020683;IPR020683;IPR036770;IPR036770
TRINITY_DN100046_c1_g1_i2	multiple ankyrin repeats single kh domain protein, putative	3534	1	1.4E-50	74.73%	gi|241596155|ref|XP_002404523.1|multiple ankyrin repeats single kh domain protein, putative [Ixodes scapularis]/gi|215500429|gb|EEC09923.1| multiple ankyrin repeats single kh domain protein, putative, partial [Ixodes scapularis]	Ixodes scapularis/Ixodes scapularis			IPR002110;IPR036770;IPR036770;IPR036770;noIPR;IPR020683;IPR036770;noIPR;noIPR;noIPR;noIPR;noIPR;noIPR;noIPR;noIPR;noIPR;noIPR;noIPR;noIPR;IPR002110;IPR002110;IPR002110;IPR020683;IPR002110;IPR002110;IPR002110;IPR002110;IPR002110;IPR002110;IPR002110;IPR002110;IPR020683;IPR020683;IPR020683;IPR020683;IPR036770;IPR036770
TRINITY_DN100046_c1_g1_i3	multiple ankyrin repeats single kh domain protein, putative	3363	1	1.4E-50	74.73%	gi|241596155|ref|XP_002404523.1|multiple ankyrin repeats single kh domain protein, putative [Ixodes scapularis]/gi|215500429|gb|EEC09923.1| multiple ankyrin repeats single kh domain protein, putative, partial [Ixodes scapularis]	Ixodes scapularis/Ixodes scapularis			IPR002110;IPR036770;noIPR;IPR020683;IPR036770;IPR036770;IPR036770;noIPR;noIPR;noIPR;noIPR;noIPR;noIPR;noIPR;noIPR;noIPR;noIPR;noIPR;noIPR;IPR002110;IPR002110;IPR002110;IPR020683;IPR002110;IPR002110;IPR002110;IPR002110;IPR002110;IPR002110;IPR002110;IPR002110;IPR020683;IPR020683;IPR020683;IPR020683;IPR036770;IPR036770
TRINITY_DN100046_c1_g1_i5	multiple ankyrin repeats single kh domain protein, putative	2776	1	6.4E-46	73.10%	gi|241596155|ref|XP_002404523.1|multiple ankyrin repeats single kh domain protein, putative [Ixodes scapularis]/gi|215500429|gb|EEC09923.1| multiple ankyrin repeats single kh domain protein, putative, partial [Ixodes scapularis]	Ixodes scapularis/Ixodes scapularis			IPR002110;noIPR;IPR036770;IPR036770;IPR036770;IPR020683;IPR036770;noIPR;noIPR;noIPR;noIPR;noIPR;noIPR;noIPR;noIPR;noIPR;IPR002110;IPR002110;IPR002110;IPR002110;IPR002110;IPR002110;IPR002110;IPR020683;IPR002110;IPR002110;IPR002110;IPR002110;IPR020683;IPR020683;IPR020683;IPR020683;IPR036770;IPR036770
TRINITY_DN100046_c1_g1_i6	multiple ankyrin repeats single kh domain protein, putative	3189	1	1.3E-50	74.73%	gi|241596155|ref|XP_002404523.1|multiple ankyrin repeats single kh domain protein, putative [Ixodes scapularis]/gi|215500429|gb|EEC09923.1| multiple ankyrin repeats single kh domain protein, putative, partial [Ixodes scapularis]	Ixodes scapularis/Ixodes scapularis			IPR002110;IPR020683;IPR036770;noIPR;IPR036770;IPR036770;IPR036770;noIPR;noIPR;noIPR;noIPR;noIPR;noIPR;noIPR;noIPR;noIPR;noIPR;noIPR;noIPR;IPR002110;IPR002110;IPR002110;IPR020683;IPR002110;IPR002110;IPR002110;IPR002110;IPR002110;IPR002110;IPR002110;IPR002110;IPR020683;IPR020683;IPR020683;IPR020683;IPR036770;IPR036770
TRINITY_DN100048_c5_g1_i2	pol polyprotein	515	1	2.5E-33	57.89%	gi|599127480|gb|AHN53418.1|pol polyprotein [Nuttalliella namaqua]	Nuttalliella namaqua			IPR036397;noIPR;noIPR;IPR012337
TRINITY_DN100048_c5_g2_i2	pol polyprotein	1433	1	9.3E-150	70.89%	gi|599127480|gb|AHN53418.1|pol polyprotein [Nuttalliella namaqua]	Nuttalliella namaqua			IPR041577;noIPR;noIPR;noIPR;IPR000477;noIPR;IPR000477;noIPR;noIPR
TRINITY_DN100049_c2_g1_i10	putative gag protein	1113	1	4.9E-13	66.30%	gi|599127481|gb|AHN53419.1|putative gag protein, partial [Nuttalliella namaqua]	Nuttalliella namaqua			noIPR;noIPR
TRINITY_DN100049_c2_g1_i2	putative gag protein	646	1	2.5E-17	57.50%	gi|599127481|gb|AHN53419.1|putative gag protein, partial [Nuttalliella namaqua]	Nuttalliella namaqua			noIPR
TRINITY_DN100049_c2_g1_i5	putative gag protein	527	1	7.9E-14	56.12%	gi|599127481|gb|AHN53419.1|putative gag protein, partial [Nuttalliella namaqua]	Nuttalliella namaqua
TRINITY_DN100049_c2_g1_i6	putative gag protein	763	1	4.3E-13	65.22%	gi|599127481|gb|AHN53419.1|putative gag protein, partial [Nuttalliella namaqua]	Nuttalliella namaqua			IPR005162
TRINITY_DN100049_c2_g1_i7	putative gag protein	968	1	1.4E-13	56.83%	gi|599127481|gb|AHN53419.1|putative gag protein, partial [Nuttalliella namaqua]	Nuttalliella namaqua			IPR005162
TRINITY_DN100049_c2_g1_i8	putative gag protein	1105	1	4.8E-13	66.30%	gi|599127481|gb|AHN53419.1|putative gag protein, partial [Nuttalliella namaqua]	Nuttalliella namaqua
TRINITY_DN100050_c2_g1_i1	tankyrase-like protein isoform X2	7937	1	0.0E0	58.22%	gi|1238840667|ref|XP_022239134.1|tankyrase-like protein isoform X2 [Limulus polyphemus]	Limulus polyphemus	EC:2.4.2.30	NAD(+) ADP-ribosyltransferase	IPR002110;IPR004102;IPR036616;IPR036770;noIPR;IPR036770;IPR012317;IPR036770;IPR036930;IPR036770;IPR036770;IPR008893;IPR036770;IPR020683;IPR036770;noIPR;noIPR;noIPR;noIPR;noIPR;noIPR;noIPR;noIPR;noIPR;noIPR;IPR020683;IPR002110;IPR004102;IPR002110;IPR012317;IPR002110;IPR002110;IPR002110;IPR002110;IPR002110;IPR002110;IPR002110;noIPR;IPR020683;IPR020683;IPR020683;IPR020683;IPR020683;IPR020683;IPR0206…
TRINITY_DN100050_c2_g1_i2	tankyrase-like protein isoform X2	8021	1	0.0E0	57.53%	gi|1238840667|ref|XP_022239134.1|tankyrase-like protein isoform X2 [Limulus polyphemus]	Limulus polyphemus			IPR002110;IPR036930;IPR036770;IPR036770;IPR036770;IPR008893;IPR036770;IPR036770;IPR020683;IPR036770;IPR036770;noIPR;noIPR;noIPR;noIPR;noIPR;noIPR;noIPR;noIPR;noIPR;noIPR;IPR002110;IPR020683;IPR002110;IPR002110;IPR002110;IPR002110;IPR002110;IPR002110;IPR002110;IPR002110;IPR020683;IPR020683;IPR020683;IPR020683;IPR020683;IPR020683;IPR020683;noIPR;IPR020683;IPR020683;IPR020683;IPR036770;IPR036770;IPR…
TRINITY_DN100052_c0_g1_i7	PREDICTED: uncharacterized protein K02A2.6	1717	1	6.6E-126	61.78%	gi|1110935538|ref|XP_013125909.2|PREDICTED: uncharacterized protein K02A2.6 [Oreochromis niloticus]	Oreochromis niloticus			noIPR;noIPR;noIPR;IPR021109;IPR000477;noIPR;noIPR;IPR000477;noIPR;noIPR;IPR021109;noIPR
TRINITY_DN100053_c3_g2_i1	cargo transport protein EMP24, putative	2055	1	2.8E-115	86.14%	gi|241680652|ref|XP_002411573.1|cargo transport protein EMP24, putative [Ixodes scapularis]/gi|215504308|gb|EEC13802.1| cargo transport protein EMP24, putative [Ixodes scapularis]	Ixodes scapularis/Ixodes scapularis			IPR009038;IPR015720;noIPR;IPR009038;IPR036598
TRINITY_DN100053_c3_g2_i11	cargo transport protein EMP24, putative	2173	1	3.0E-115	86.14%	gi|241680652|ref|XP_002411573.1|cargo transport protein EMP24, putative [Ixodes scapularis]/gi|215504308|gb|EEC13802.1| cargo transport protein EMP24, putative [Ixodes scapularis]	Ixodes scapularis/Ixodes scapularis			IPR009038;IPR015720;noIPR;IPR009038;IPR036598
TRINITY_DN100053_c3_g2_i13	cargo transport protein EMP24, putative	1757	1	2.4E-115	86.14%	gi|241680652|ref|XP_002411573.1|cargo transport protein EMP24, putative [Ixodes scapularis]/gi|215504308|gb|EEC13802.1| cargo transport protein EMP24, putative [Ixodes scapularis]	Ixodes scapularis/Ixodes scapularis			IPR009038;IPR015720;noIPR;IPR009038;IPR036598
TRINITY_DN100053_c3_g2_i14	cargo transport protein EMP24, putative	1093	1	1.7E-58	96.03%	gi|241680652|ref|XP_002411573.1|cargo transport protein EMP24, putative [Ixodes scapularis]/gi|215504308|gb|EEC13802.1| cargo transport protein EMP24, putative [Ixodes scapularis]	Ixodes scapularis/Ixodes scapularis			IPR009038;noIPR;IPR015720;IPR036598
TRINITY_DN100053_c3_g2_i15	cargo transport protein EMP24, putative	1376	1	1.9E-115	86.14%	gi|241680652|ref|XP_002411573.1|cargo transport protein EMP24, putative [Ixodes scapularis]/gi|215504308|gb|EEC13802.1| cargo transport protein EMP24, putative [Ixodes scapularis]	Ixodes scapularis/Ixodes scapularis			IPR009038;IPR015720;noIPR;IPR009038;IPR036598
TRINITY_DN100053_c3_g2_i2	cargo transport protein EMP24, putative	1756	1	2.4E-115	86.14%	gi|241680652|ref|XP_002411573.1|cargo transport protein EMP24, putative [Ixodes scapularis]/gi|215504308|gb|EEC13802.1| cargo transport protein EMP24, putative [Ixodes scapularis]	Ixodes scapularis/Ixodes scapularis			IPR009038;IPR015720;noIPR;IPR009038;IPR036598
TRINITY_DN100053_c3_g2_i3	cargo transport protein EMP24, putative	2157	1	2.9E-115	86.14%	gi|241680652|ref|XP_002411573.1|cargo transport protein EMP24, putative [Ixodes scapularis]/gi|215504308|gb|EEC13802.1| cargo transport protein EMP24, putative [Ixodes scapularis]	Ixodes scapularis/Ixodes scapularis			IPR009038;IPR015720;noIPR;IPR009038;IPR036598
TRINITY_DN100053_c3_g2_i5	cargo transport protein EMP24, putative	2172	1	3.0E-115	86.14%	gi|241680652|ref|XP_002411573.1|cargo transport protein EMP24, putative [Ixodes scapularis]/gi|215504308|gb|EEC13802.1| cargo transport protein EMP24, putative [Ixodes scapularis]	Ixodes scapularis/Ixodes scapularis			IPR009038;IPR015720;noIPR;IPR009038;IPR036598
TRINITY_DN100053_c3_g2_i6	cargo transport protein EMP24, putative	2083	1	2.8E-115	86.14%	gi|241680652|ref|XP_002411573.1|cargo transport protein EMP24, putative [Ixodes scapularis]/gi|215504308|gb|EEC13802.1| cargo transport protein EMP24, putative [Ixodes scapularis]	Ixodes scapularis/Ixodes scapularis			IPR009038;IPR015720;noIPR;IPR009038;IPR036598
TRINITY_DN100053_c3_g2_i7	cargo transport protein EMP24, putative	2084	1	2.8E-115	86.14%	gi|241680652|ref|XP_002411573.1|cargo transport protein EMP24, putative [Ixodes scapularis]/gi|215504308|gb|EEC13802.1| cargo transport protein EMP24, putative [Ixodes scapularis]	Ixodes scapularis/Ixodes scapularis			IPR009038;IPR015720;noIPR;IPR009038;IPR036598
TRINITY_DN100053_c3_g2_i8	cargo transport protein EMP24, putative	2165	1	2.9E-115	86.14%	gi|241680652|ref|XP_002411573.1|cargo transport protein EMP24, putative [Ixodes scapularis]/gi|215504308|gb|EEC13802.1| cargo transport protein EMP24, putative [Ixodes scapularis]	Ixodes scapularis/Ixodes scapularis			IPR009038;IPR015720;noIPR;IPR009038;IPR036598
TRINITY_DN100053_c3_g2_i9	cargo transport protein EMP24, putative	2056	1	2.8E-115	86.14%	gi|241680652|ref|XP_002411573.1|cargo transport protein EMP24, putative [Ixodes scapularis]/gi|215504308|gb|EEC13802.1| cargo transport protein EMP24, putative [Ixodes scapularis]	Ixodes scapularis/Ixodes scapularis			IPR009038;IPR015720;noIPR;IPR009038;IPR036598
TRINITY_DN100053_c3_g4_i1	8-oxoguanine DNA glycosylase, putative	1334	1	1.4E-107	73.19%	gi|241735371|ref|XP_002404906.1|8-oxoguanine DNA glycosylase, putative [Ixodes scapularis]/gi|215505591|gb|EEC15085.1| 8-oxoguanine DNA glycosylase, putative [Ixodes scapularis]	Ixodes scapularis/Ixodes scapularis	EC:3.2.2.23	DNA-formamidopyrimidine glycosylase	noIPR;IPR012904;noIPR;IPR023170;IPR003265;noIPR;noIPR;noIPR;noIPR;IPR003265;IPR011257;noIPR
TRINITY_DN100053_c3_g4_i2	8-oxoguanine DNA glycosylase, putative	1728	1	1.8E-107	73.19%	gi|241735371|ref|XP_002404906.1|8-oxoguanine DNA glycosylase, putative [Ixodes scapularis]/gi|215505591|gb|EEC15085.1| 8-oxoguanine DNA glycosylase, putative [Ixodes scapularis]	Ixodes scapularis/Ixodes scapularis	EC:3.2.2.23	DNA-formamidopyrimidine glycosylase	noIPR;noIPR;IPR012904;IPR023170;IPR003265;noIPR;noIPR;noIPR;noIPR;IPR003265;IPR011257;noIPR
TRINITY_DN100054_c2_g1_i1	coiled-coil domain-containing protein, putative	5139	1	6.2E-196	76.83%	gi|241570582|ref|XP_002402814.1|coiled-coil domain-containing protein, putative [Ixodes scapularis]/gi|215500132|gb|EEC09626.1| coiled-coil domain-containing protein, putative [Ixodes scapularis]	Ixodes scapularis/Ixodes scapularis			IPR008530;noIPR;noIPR;noIPR;IPR008530
TRINITY_DN100054_c2_g1_i2	coiled-coil domain-containing protein, putative	4911	1	5.9E-196	76.83%	gi|241570582|ref|XP_002402814.1|coiled-coil domain-containing protein, putative [Ixodes scapularis]/gi|215500132|gb|EEC09626.1| coiled-coil domain-containing protein, putative [Ixodes scapularis]	Ixodes scapularis/Ixodes scapularis			IPR008530;noIPR;noIPR;noIPR;IPR008530
TRINITY_DN100054_c2_g1_i3	coiled-coil domain-containing protein, putative	4702	1	2.4E-186	76.35%	gi|241570582|ref|XP_002402814.1|coiled-coil domain-containing protein, putative [Ixodes scapularis]/gi|215500132|gb|EEC09626.1| coiled-coil domain-containing protein, putative [Ixodes scapularis]	Ixodes scapularis/Ixodes scapularis			IPR008530;noIPR;noIPR;IPR008530
TRINITY_DN100055_c2_g1_i1	protein NUF1, putative	5741	1	4.2E-193	70.92%	gi|241562839|ref|XP_002401475.1|protein NUF1, putative [Ixodes scapularis]/gi|215499874|gb|EEC09368.1| protein NUF1, putative [Ixodes scapularis]	Ixodes scapularis/Ixodes scapularis			noIPR;noIPR;noIPR;noIPR;noIPR;noIPR;noIPR;IPR033288;noIPR
TRINITY_DN100055_c2_g1_i2	protein NUF1, putative	5740	1	4.2E-193	70.92%	gi|241562839|ref|XP_002401475.1|protein NUF1, putative [Ixodes scapularis]/gi|215499874|gb|EEC09368.1| protein NUF1, putative [Ixodes scapularis]	Ixodes scapularis/Ixodes scapularis			noIPR;noIPR;noIPR;noIPR;noIPR;noIPR;noIPR;IPR033288;noIPR
TRINITY_DN100057_c4_g1_i1	hypothetical protein IscW_ISCW001111	2938	1	8.8E-30	58.50%	gi|241061048|ref|XP_002408053.1|hypothetical protein IscW_ISCW001111 [Ixodes scapularis]/gi|215492349|gb|EEC01990.1| hypothetical protein IscW_ISCW001111 [Ixodes scapularis]	Ixodes scapularis/Ixodes scapularis
TRINITY_DN100057_c4_g1_i2	hypothetical protein IscW_ISCW001111	1928	1	5.8E-30	58.50%	gi|241061048|ref|XP_002408053.1|hypothetical protein IscW_ISCW001111 [Ixodes scapularis]/gi|215492349|gb|EEC01990.1| hypothetical protein IscW_ISCW001111 [Ixodes scapularis]	Ixodes scapularis/Ixodes scapularis
TRINITY_DN100057_c4_g1_i4	hypothetical protein IscW_ISCW001111	1618	1	4.9E-30	58.50%	gi|241061048|ref|XP_002408053.1|hypothetical protein IscW_ISCW001111 [Ixodes scapularis]/gi|215492349|gb|EEC01990.1| hypothetical protein IscW_ISCW001111 [Ixodes scapularis]	Ixodes scapularis/Ixodes scapularis
TRINITY_DN100057_c4_g1_i6	hypothetical protein IscW_ISCW001111	1619	1	4.9E-30	58.50%	gi|241061048|ref|XP_002408053.1|hypothetical protein IscW_ISCW001111 [Ixodes scapularis]/gi|215492349|gb|EEC01990.1| hypothetical protein IscW_ISCW001111 [Ixodes scapularis]	Ixodes scapularis/Ixodes scapularis
TRINITY_DN100057_c4_g1_i8	hypothetical protein IscW_ISCW001111	2937	1	8.8E-30	58.50%	gi|241061048|ref|XP_002408053.1|hypothetical protein IscW_ISCW001111 [Ixodes scapularis]/gi|215492349|gb|EEC01990.1| hypothetical protein IscW_ISCW001111 [Ixodes scapularis]	Ixodes scapularis/Ixodes scapularis
TRINITY_DN100057_c4_g3_i1	hypothetical protein IscW_ISCW001110	1756	1	2.5E-80	73.11%	gi|241061044|ref|XP_002408052.1|hypothetical protein IscW_ISCW001110 [Ixodes scapularis]/gi|215492348|gb|EEC01989.1| hypothetical protein IscW_ISCW001110 [Ixodes scapularis]	Ixodes scapularis/Ixodes scapularis			noIPR
TRINITY_DN100059_c2_g1_i1	hypothetical protein IscW_ISCW005564	6397	1	1.7E-206	64.78%	gi|242003991|ref|XP_002436244.1|hypothetical protein IscW_ISCW005564 [Ixodes scapularis]/gi|215499580|gb|EEC09074.1| hypothetical protein IscW_ISCW005564 [Ixodes scapularis]	Ixodes scapularis/Ixodes scapularis			noIPR;IPR013216;noIPR;noIPR;noIPR;noIPR;noIPR;noIPR;noIPR;noIPR;noIPR;noIPR;noIPR;noIPR;noIPR;noIPR;noIPR;noIPR;IPR032873;noIPR;noIPR;IPR029063
TRINITY_DN100059_c2_g1_i2	hypothetical protein IscW_ISCW005565	620	1	3.5E-21	84.72%	gi|242003993|ref|XP_002436245.1|hypothetical protein IscW_ISCW005565 [Ixodes scapularis]/gi|215499581|gb|EEC09075.1| hypothetical protein IscW_ISCW005565 [Ixodes scapularis]	Ixodes scapularis/Ixodes scapularis			IPR032863;noIPR
TRINITY_DN100059_c2_g1_i3	hypothetical protein IscW_ISCW005564	6396	1	1.7E-206	64.78%	gi|242003991|ref|XP_002436244.1|hypothetical protein IscW_ISCW005564 [Ixodes scapularis]/gi|215499580|gb|EEC09074.1| hypothetical protein IscW_ISCW005564 [Ixodes scapularis]	Ixodes scapularis/Ixodes scapularis			noIPR;IPR013216;noIPR;noIPR;noIPR;noIPR;noIPR;noIPR;noIPR;noIPR;noIPR;noIPR;noIPR;noIPR;noIPR;noIPR;noIPR;noIPR;IPR032873;noIPR;noIPR;IPR029063
TRINITY_DN100060_c0_g1_i1	flocculation protein FLO11 isoform X4	1625	1	2.4E-13	68.97%	gi|936588677|ref|XP_014207628.1|flocculation protein FLO11 isoform X4 [Copidosoma floridanum]	Copidosoma floridanum			noIPR;noIPR;noIPR;noIPR;noIPR
TRINITY_DN100060_c0_g1_i2	flocculation protein FLO11 isoform X4	1739	1	4.0E-14	68.13%	gi|936588677|ref|XP_014207628.1|flocculation protein FLO11 isoform X4 [Copidosoma floridanum]	Copidosoma floridanum			noIPR;noIPR;noIPR;noIPR;noIPR
TRINITY_DN100060_c0_g1_i3	flocculation protein FLO11 isoform X4	1688	1	3.9E-14	68.13%	gi|936588677|ref|XP_014207628.1|flocculation protein FLO11 isoform X4 [Copidosoma floridanum]	Copidosoma floridanum			noIPR;noIPR;noIPR;noIPR;noIPR
TRINITY_DN100062_c3_g1_i4	putative nuclease HARBI1	2001	1	2.2E-101	64.17%	gi|1007777967|ref|XP_015826476.1|PREDICTED: putative nuclease HARBI1 [Nothobranchius furzeri]	Nothobranchius furzeri			IPR027806;noIPR;noIPR
TRINITY_DN100062_c3_g1_i5	putative nuclease HARBI1 isoform X1	2077	1	2.0E-89	68.52%	gi|1007744899|ref|XP_015812536.1|PREDICTED: putative nuclease HARBI1 isoform X1 [Nothobranchius furzeri]	Nothobranchius furzeri			IPR027806;noIPR;noIPR
TRINITY_DN100063_c4_g2_i1	tectonin beta-propeller repeat-containing protein 1	3776	1	2.6E-228	62.16%	gi|1192750907|ref|XP_021004569.1|tectonin beta-propeller repeat-containing protein 1 [Parasteatoda tepidariorum]	Parasteatoda tepidariorum			IPR006624;IPR010482;noIPR;noIPR;noIPR;noIPR;noIPR
TRINITY_DN100063_c4_g2_i2	tectonin beta-propeller repeat-containing protein 1	3737	1	2.0E-228	62.47%	gi|1192750907|ref|XP_021004569.1|tectonin beta-propeller repeat-containing protein 1 [Parasteatoda tepidariorum]	Parasteatoda tepidariorum			IPR010482;IPR006624;noIPR;noIPR;noIPR;noIPR;noIPR
TRINITY_DN100063_c4_g2_i3	conserved hypothetical protein	1440	1	2.3E-156	90.22%	gi|241700165|ref|XP_002411889.1|conserved hypothetical protein [Ixodes scapularis]/gi|215504827|gb|EEC14321.1| conserved hypothetical protein, partial [Ixodes scapularis]	Ixodes scapularis/Ixodes scapularis			IPR010482;IPR006624;noIPR;noIPR
TRINITY_DN100064_c2_g1_i1	protein gooseberry-like	3266	1	3.8E-114	64.08%	gi|1316195526|ref|XP_023243455.1|protein gooseberry-like [Centruroides sculpturatus]	Centruroides sculpturatus			IPR001523;IPR001523;IPR001356;noIPR;IPR036388;IPR036388;noIPR;noIPR;noIPR;noIPR;IPR001356;IPR001523;IPR001356;IPR001523;IPR009057;IPR009057
TRINITY_DN100064_c2_g1_i2	protein gooseberry-like	805	1	6.7E-89	79.44%	gi|1316195526|ref|XP_023243455.1|protein gooseberry-like [Centruroides sculpturatus]	Centruroides sculpturatus			IPR001523;IPR001523;IPR001356;noIPR;IPR036388;IPR036388;noIPR;noIPR;IPR001356;IPR001523;IPR001523;IPR001356;IPR009057;IPR009057
TRINITY_DN100064_c2_g1_i3	protein gooseberry-like	3254	1	1.5E-110	63.27%	gi|1316195526|ref|XP_023243455.1|protein gooseberry-like [Centruroides sculpturatus]	Centruroides sculpturatus			IPR001523;IPR036388;IPR001356;noIPR;IPR001523;IPR036388;noIPR;noIPR;noIPR;IPR001523;IPR001356;IPR001523;IPR001356;IPR009057;IPR009057
TRINITY_DN100065_c2_g1_i3	hypothetical protein	629	1	8.5E-31	59.24%	gi|1180269025|ref|WP_083787830.1|hypothetical protein [Rickettsia endosymbiont of Ixodes scapularis]	Rickettsia endosymbiont of Ixodes scapularis
TRINITY_DN100065_c2_g1_i4	hypothetical protein	945	1	5.0E-35	59.83%	gi|1180269025|ref|WP_083787830.1|hypothetical protein [Rickettsia endosymbiont of Ixodes scapularis]	Rickettsia endosymbiont of Ixodes scapularis	EC:3.4.23	Acting on peptide bonds (peptidases)	IPR021109;noIPR;IPR001995;noIPR;IPR021109
TRINITY_DN100065_c2_g1_i6	hypothetical protein	828	1	4.1E-33	58.95%	gi|1180269025|ref|WP_083787830.1|hypothetical protein [Rickettsia endosymbiont of Ixodes scapularis]	Rickettsia endosymbiont of Ixodes scapularis	EC:3.4.23	Acting on peptide bonds (peptidases)	noIPR;IPR021109;IPR001995;noIPR;IPR021109
TRINITY_DN100065_c2_g2_i1	pol polyprotein	620	1	3.9E-12	60.81%	gi|599127478|gb|AHN53417.1|pol polyprotein [Nuttalliella namaqua]	Nuttalliella namaqua			noIPR;noIPR;IPR001878;IPR036875
TRINITY_DN100065_c2_g2_i2	pol polyprotein	621	1	3.7E-18	50.23%	gi|599127478|gb|AHN53417.1|pol polyprotein [Nuttalliella namaqua]	Nuttalliella namaqua			IPR001878;IPR036875
TRINITY_DN100069_c2_g1_i1	hypothetical protein X975_11963, partial	2501	1	7.9E-104	68.91%	gi|675371015|gb|KFM63917.1|hypothetical protein X975_11963, partial [Stegodyphus mimosarum]	Stegodyphus mimosarum			IPR038717;noIPR
TRINITY_DN100069_c2_g1_i4	hypothetical protein X975_11963, partial	1448	1	1.3E-74	68.80%	gi|675371015|gb|KFM63917.1|hypothetical protein X975_11963, partial [Stegodyphus mimosarum]	Stegodyphus mimosarum			IPR038717;noIPR
TRINITY_DN100069_c2_g1_i5	hypothetical protein X975_11963, partial	3435	1	5.2E-74	68.80%	gi|675371015|gb|KFM63917.1|hypothetical protein X975_11963, partial [Stegodyphus mimosarum]	Stegodyphus mimosarum			IPR038717;noIPR
TRINITY_DN100069_c2_g1_i6	hypothetical protein X975_11963, partial	3508	1	5.3E-74	68.80%	gi|675371015|gb|KFM63917.1|hypothetical protein X975_11963, partial [Stegodyphus mimosarum]	Stegodyphus mimosarum			IPR038717;noIPR
TRINITY_DN100069_c2_g1_i7	hypothetical protein X975_11963, partial	3457	1	5.3E-74	68.80%	gi|675371015|gb|KFM63917.1|hypothetical protein X975_11963, partial [Stegodyphus mimosarum]	Stegodyphus mimosarum			IPR038717;noIPR
TRINITY_DN100076_c2_g1_i1	positive cofactor 2, subunit of a RNA polymerase II multiprotein coactivator, putative	3847	1	1.6E-116	54.31%	gi|241684480|ref|XP_002401270.1|positive cofactor 2, subunit of a RNA polymerase II multiprotein coactivator, putative [Ixodes scapularis]/gi|215504431|gb|EEC13925.1| positive cofactor 2, subunit of a RNA polymerase II multiprotein coactivator, putative, partial [Ixodes scapularis]	Ixodes scapularis/Ixodes scapularis			IPR019087;noIPR
TRINITY_DN100076_c2_g1_i3	positive cofactor 2, subunit of a RNA polymerase II multiprotein coactivator, putative	3483	1	1.7E-88	50.74%	gi|241684480|ref|XP_002401270.1|positive cofactor 2, subunit of a RNA polymerase II multiprotein coactivator, putative [Ixodes scapularis]/gi|215504431|gb|EEC13925.1| positive cofactor 2, subunit of a RNA polymerase II multiprotein coactivator, putative, partial [Ixodes scapularis]	Ixodes scapularis/Ixodes scapularis			IPR019087;noIPR;noIPR;noIPR;noIPR;noIPR;noIPR;noIPR
TRINITY_DN100076_c2_g1_i5	positive cofactor 2, subunit of a RNA polymerase II multiprotein coactivator, putative	1393	1	2.8E-111	79.59%	gi|241684480|ref|XP_002401270.1|positive cofactor 2, subunit of a RNA polymerase II multiprotein coactivator, putative [Ixodes scapularis]/gi|215504431|gb|EEC13925.1| positive cofactor 2, subunit of a RNA polymerase II multiprotein coactivator, putative, partial [Ixodes scapularis]	Ixodes scapularis/Ixodes scapularis			IPR019087;noIPR;noIPR;noIPR;noIPR;noIPR
TRINITY_DN100076_c2_g1_i6	positive cofactor 2, subunit of a RNA polymerase II multiprotein coactivator, putative	1195	1	5.0E-16	70.29%	gi|241684480|ref|XP_002401270.1|positive cofactor 2, subunit of a RNA polymerase II multiprotein coactivator, putative [Ixodes scapularis]/gi|215504431|gb|EEC13925.1| positive cofactor 2, subunit of a RNA polymerase II multiprotein coactivator, putative, partial [Ixodes scapularis]	Ixodes scapularis/Ixodes scapularis			IPR019087;noIPR;noIPR;noIPR;noIPR;noIPR;noIPR;noIPR
TRINITY_DN100076_c2_g2_i1	positive cofactor 2, subunit of a RNA polymerase II multiprotein coactivator, putative	1475	1	1.7E-10	91.89%	gi|241684480|ref|XP_002401270.1|positive cofactor 2, subunit of a RNA polymerase II multiprotein coactivator, putative [Ixodes scapularis]/gi|215504431|gb|EEC13925.1| positive cofactor 2, subunit of a RNA polymerase II multiprotein coactivator, putative, partial [Ixodes scapularis]	Ixodes scapularis/Ixodes scapularis			IPR019087
TRINITY_DN100076_c2_g2_i2	positive cofactor 2, subunit of a RNA polymerase II multiprotein coactivator, putative	1453	1	1.7E-10	91.89%	gi|241684480|ref|XP_002401270.1|positive cofactor 2, subunit of a RNA polymerase II multiprotein coactivator, putative [Ixodes scapularis]/gi|215504431|gb|EEC13925.1| positive cofactor 2, subunit of a RNA polymerase II multiprotein coactivator, putative, partial [Ixodes scapularis]	Ixodes scapularis/Ixodes scapularis			IPR019087
TRINITY_DN100077_c0_g1_i1	serine/threonine kinase	1604	1	4.8E-163	95.11%	gi|332348546|gb|AEE60827.1|serine/threonine kinase [Haemaphysalis longicornis]	Haemaphysalis longicornis			IPR000719;noIPR;noIPR;noIPR;IPR000719;noIPR;IPR011009
TRINITY_DN100077_c0_g1_i2	serine/threonine kinase	1668	1	1.7E-147	95.02%	gi|332348546|gb|AEE60827.1|serine/threonine kinase [Haemaphysalis longicornis]	Haemaphysalis longicornis			IPR000719;noIPR;noIPR;noIPR;IPR000719;IPR011009
TRINITY_DN100077_c1_g1_i1	piggyBac transposable element-derived protein 2-like	1926	1	6.7E-87	54.31%	gi|1024990239|ref|XP_016315217.1|PREDICTED: piggyBac transposable element-derived protein 2-like [Sinocyclocheilus anshuiensis]	Sinocyclocheilus anshuiensis			IPR029526;noIPR;noIPR
TRINITY_DN100077_c1_g1_i4	piggyBac transposable element-derived protein 3-like	1392	1	7.5E-72	71.76%	gi|957859096|ref|XP_014678507.1|PREDICTED: piggyBac transposable element-derived protein 3-like [Priapulus caudatus]	Priapulus caudatus			IPR029526;noIPR
TRINITY_DN100077_c1_g1_i5	piggyBac transposable element-derived protein 3-like	1392	1	2.5E-51	75.88%	gi|957859096|ref|XP_014678507.1|PREDICTED: piggyBac transposable element-derived protein 3-like [Priapulus caudatus]	Priapulus caudatus			IPR029526;noIPR
TRINITY_DN100077_c1_g1_i6	piggyBac transposable element-derived protein 3-like	968	1	2.1E-49	75.29%	gi|957859096|ref|XP_014678507.1|PREDICTED: piggyBac transposable element-derived protein 3-like [Priapulus caudatus]	Priapulus caudatus			IPR029526;noIPR
TRINITY_DN100077_c1_g1_i7	piggyBac transposable element-derived protein 2-like	1699	1	1.3E-86	54.31%	gi|1024990239|ref|XP_016315217.1|PREDICTED: piggyBac transposable element-derived protein 2-like [Sinocyclocheilus anshuiensis]	Sinocyclocheilus anshuiensis			IPR029526;noIPR;noIPR
TRINITY_DN100078_c4_g3_i1	caspase-2	1891	1	4.5E-19	65.22%	gi|110006347|gb|ABG48665.1|caspase-2 [Haemaphysalis longicornis]	Haemaphysalis longicornis	EC:3.4.22	Acting on peptide bonds (peptidases)	noIPR;IPR002138;IPR029030
TRINITY_DN100078_c4_g3_i2	caspase-2	2169	1	4.2E-37	54.66%	gi|110006347|gb|ABG48665.1|caspase-2 [Haemaphysalis longicornis]	Haemaphysalis longicornis	EC:3.4.22	Acting on peptide bonds (peptidases)	IPR015917;noIPR;noIPR;noIPR;IPR002398;IPR001309;IPR002138;IPR029030
TRINITY_DN100078_c4_g3_i3	caspase-2	2578	1	9.7E-57	57.05%	gi|110006347|gb|ABG48665.1|caspase-2 [Haemaphysalis longicornis]	Haemaphysalis longicornis	EC:3.4.22	Acting on peptide bonds (peptidases)	IPR015917;noIPR;noIPR;noIPR;noIPR;noIPR;IPR002398;IPR002138;IPR001309;IPR015917;IPR029030
TRINITY_DN100078_c4_g3_i4	caspase-2	2495	1	9.4E-57	57.05%	gi|110006347|gb|ABG48665.1|caspase-2 [Haemaphysalis longicornis]	Haemaphysalis longicornis	EC:3.4.22	Acting on peptide bonds (peptidases)	IPR015917;noIPR;noIPR;noIPR;IPR002398;noIPR;IPR002138;IPR001309;IPR015917;IPR029030
TRINITY_DN100079_c5_g1_i2	aftiphilin-like isoform X3	5198	1	1.5E-27	50.59%	gi|1238873704|ref|XP_022250640.1|aftiphilin-like isoform X3 [Limulus polyphemus]	Limulus polyphemus			IPR029205;noIPR;noIPR;noIPR;noIPR;noIPR;noIPR
TRINITY_DN100079_c5_g1_i3	aftiphilin-like isoform X3	5096	1	1.4E-27	50.59%	gi|1238873704|ref|XP_022250640.1|aftiphilin-like isoform X3 [Limulus polyphemus]	Limulus polyphemus			IPR029205;noIPR;noIPR;noIPR;noIPR;noIPR
TRINITY_DN100079_c5_g1_i6	aftiphilin-like isoform X3	3174	1	1.5E-27	50.59%	gi|1238873704|ref|XP_022250640.1|aftiphilin-like isoform X3 [Limulus polyphemus]	Limulus polyphemus			IPR029205;noIPR;noIPR;noIPR;noIPR;noIPR
TRINITY_DN100080_c1_g1_i1	regulator of G-protein signaling 20-like	8899	1	2.4E-70	89.29%	gi|1238830676|ref|XP_022244362.1|regulator of G-protein signaling 20-like [Limulus polyphemus]	Limulus polyphemus			IPR016137;noIPR;IPR016137;IPR024066;noIPR;noIPR;noIPR;noIPR;noIPR;noIPR;noIPR;noIPR;IPR016137;noIPR;IPR036305
TRINITY_DN100081_c1_g1_i3	hypothetical protein IscW_ISCW021203	4646	1	8.0E-94	65.44%	gi|241691759|ref|XP_002402020.1|hypothetical protein IscW_ISCW021203 [Ixodes scapularis]/gi|215504641|gb|EEC14135.1| hypothetical protein IscW_ISCW021203 [Ixodes scapularis]	Ixodes scapularis/Ixodes scapularis			noIPR;noIPR
TRINITY_DN100082_c1_g1_i1	target of rapamycin complex subunit lst8-like isoform X1	514	1	2.0E-38	67.46%	gi|1238896185|ref|XP_022235015.1|target of rapamycin complex subunit lst8-like isoform X1 [Limulus polyphemus]/gi|1238896187|ref|XP_022235016.1| target of rapamycin complex subunit lst8-like isoform X1 [Limulus polyphemus]	Limulus polyphemus/Limulus polyphemus			IPR001680;IPR015943;IPR037588;noIPR;IPR001680;IPR017986;IPR001680;IPR017986;IPR036322
TRINITY_DN100084_c0_g1_i11	DNA damage inducible protein, putative	949	1	2.0E-31	96.25%	gi|241122184|ref|XP_002403483.1|DNA damage inducible protein, putative [Ixodes scapularis]/gi|215493437|gb|EEC03078.1| DNA damage inducible protein, putative [Ixodes scapularis]	Ixodes scapularis/Ixodes scapularis	EC:3.4.23	Acting on peptide bonds (peptidases)	IPR021109;IPR019103;noIPR;IPR033322
TRINITY_DN100084_c0_g1_i2	DNA damage inducible protein, putative	589	1	1.2E-31	96.25%	gi|241122184|ref|XP_002403483.1|DNA damage inducible protein, putative [Ixodes scapularis]/gi|215493437|gb|EEC03078.1| DNA damage inducible protein, putative [Ixodes scapularis]	Ixodes scapularis/Ixodes scapularis	EC:3.4.23	Acting on peptide bonds (peptidases)	IPR021109;IPR019103;noIPR;IPR033322
TRINITY_DN100084_c0_g1_i3	DNA damage inducible protein, putative	2537	1	6.9E-31	96.25%	gi|241122184|ref|XP_002403483.1|DNA damage inducible protein, putative [Ixodes scapularis]/gi|215493437|gb|EEC03078.1| DNA damage inducible protein, putative [Ixodes scapularis]	Ixodes scapularis/Ixodes scapularis	EC:3.4.23	Acting on peptide bonds (peptidases)	IPR019103;IPR021109;noIPR;IPR033322
TRINITY_DN100084_c0_g1_i4	DNA damage inducible protein, putative	1556	1	5.0E-8	83.02%	gi|241122184|ref|XP_002403483.1|DNA damage inducible protein, putative [Ixodes scapularis]/gi|215493437|gb|EEC03078.1| DNA damage inducible protein, putative [Ixodes scapularis]	Ixodes scapularis/Ixodes scapularis	EC:3.4.23	Acting on peptide bonds (peptidases)	IPR019103;IPR021109
TRINITY_DN100084_c0_g1_i5	DNA damage inducible protein, putative	938	1	1.9E-31	96.25%	gi|241122184|ref|XP_002403483.1|DNA damage inducible protein, putative [Ixodes scapularis]/gi|215493437|gb|EEC03078.1| DNA damage inducible protein, putative [Ixodes scapularis]	Ixodes scapularis/Ixodes scapularis	EC:3.4.23	Acting on peptide bonds (peptidases)	IPR021109;IPR019103;noIPR;IPR033322
TRINITY_DN100084_c0_g1_i7	DNA damage inducible protein, putative	2275	1	8.3E-36	96.63%	gi|241122184|ref|XP_002403483.1|DNA damage inducible protein, putative [Ixodes scapularis]/gi|215493437|gb|EEC03078.1| DNA damage inducible protein, putative [Ixodes scapularis]	Ixodes scapularis/Ixodes scapularis	EC:3.4.23	Acting on peptide bonds (peptidases)	IPR019103;IPR021109;noIPR;IPR033322
TRINITY_DN100084_c0_g1_i8	DNA damage inducible protein, putative	2886	1	7.8E-31	96.25%	gi|241122184|ref|XP_002403483.1|DNA damage inducible protein, putative [Ixodes scapularis]/gi|215493437|gb|EEC03078.1| DNA damage inducible protein, putative [Ixodes scapularis]	Ixodes scapularis/Ixodes scapularis	EC:3.4.23	Acting on peptide bonds (peptidases)	IPR019103;IPR021109;noIPR;IPR033322
TRINITY_DN100084_c0_g1_i9	DNA damage inducible protein, putative	1905	1	6.2E-8	83.02%	gi|241122184|ref|XP_002403483.1|DNA damage inducible protein, putative [Ixodes scapularis]/gi|215493437|gb|EEC03078.1| DNA damage inducible protein, putative [Ixodes scapularis]	Ixodes scapularis/Ixodes scapularis	EC:3.4.23	Acting on peptide bonds (peptidases)	IPR019103;IPR021109
TRINITY_DN100084_c1_g1_i1	Semaphorin-2A, putative	2877	1	1.4E-298	80.43%	gi|241119242|ref|XP_002402513.1|Semaphorin-2A, putative [Ixodes scapularis]/gi|215493310|gb|EEC02951.1| Semaphorin-2A, putative, partial [Ixodes scapularis]	Ixodes scapularis/Ixodes scapularis			IPR015943;noIPR;IPR001627;noIPR;IPR027231;IPR001627;noIPR;IPR036352;noIPR
TRINITY_DN100084_c1_g1_i2	Semaphorin-2A, putative	2177	1	1.6E-182	73.95%	gi|241119242|ref|XP_002402513.1|Semaphorin-2A, putative [Ixodes scapularis]/gi|215493310|gb|EEC02951.1| Semaphorin-2A, putative, partial [Ixodes scapularis]	Ixodes scapularis/Ixodes scapularis			IPR015943;noIPR;IPR001627;noIPR;IPR027231;noIPR;IPR001627;noIPR;IPR036352
TRINITY_DN100085_c4_g1_i1	nephrin-like	5131	1	6.5E-238	77.95%	gi|1173918186|gb|OQR77940.1|nephrin-like [Tropilaelaps mercedesae]	Tropilaelaps mercedesae			noIPR;IPR013783;noIPR;IPR013783;IPR013162;IPR013783;IPR013783;IPR013783;IPR013106;noIPR;IPR007110;IPR003961;IPR007110;IPR007110;IPR007110;noIPR;noIPR;noIPR;IPR003961;IPR036179;IPR036116;IPR036179;IPR036179;IPR036179;IPR036179
TRINITY_DN100085_c4_g1_i4	sidestep protein, putative	4007	1	2.8E-220	73.79%	gi|241608865|ref|XP_002406048.1|sidestep protein, putative [Ixodes scapularis]/gi|215500747|gb|EEC10241.1| sidestep protein, putative [Ixodes scapularis]	Ixodes scapularis/Ixodes scapularis			IPR013783;IPR013783;IPR013162;IPR013783;IPR013783;noIPR;noIPR;IPR007110;IPR007110;IPR003961;IPR007110;IPR003961;noIPR;noIPR;IPR036179;IPR036179;IPR036179;IPR036116;IPR036179
TRINITY_DN100085_c4_g1_i5	nephrin-like	5143	1	6.5E-238	77.95%	gi|1173918186|gb|OQR77940.1|nephrin-like [Tropilaelaps mercedesae]	Tropilaelaps mercedesae			IPR013783;noIPR;IPR013783;IPR013162;IPR013783;noIPR;IPR013783;IPR013783;IPR013106;noIPR;IPR007110;IPR003961;IPR007110;IPR007110;IPR007110;noIPR;noIPR;noIPR;IPR003961;IPR036179;IPR036116;IPR036179;IPR036179;IPR036179;IPR036179
TRINITY_DN100085_c4_g1_i6	sidestep protein, putative	3289	1	2.3E-220	73.79%	gi|241608865|ref|XP_002406048.1|sidestep protein, putative [Ixodes scapularis]/gi|215500747|gb|EEC10241.1| sidestep protein, putative [Ixodes scapularis]	Ixodes scapularis/Ixodes scapularis			noIPR;IPR013783;IPR013783;IPR013162;IPR013783;IPR013783;noIPR;IPR007110;IPR007110;IPR007110;IPR003961;noIPR;noIPR;IPR003961;IPR036179;IPR036179;IPR036179;IPR036179;IPR036116
TRINITY_DN100085_c4_g1_i7	sidestep protein, putative	3301	1	2.3E-220	73.79%	gi|241608865|ref|XP_002406048.1|sidestep protein, putative [Ixodes scapularis]/gi|215500747|gb|EEC10241.1| sidestep protein, putative [Ixodes scapularis]	Ixodes scapularis/Ixodes scapularis			noIPR;IPR013783;IPR013783;IPR013162;IPR013783;IPR013783;noIPR;IPR007110;IPR007110;IPR007110;IPR003961;noIPR;noIPR;IPR003961;IPR036179;IPR036179;IPR036179;IPR036179;IPR036116
TRINITY_DN100087_c1_g1_i1	conserved hypothetical protein	3306	1	0.0E0	70.36%	gi|241701243|ref|XP_002411911.1|conserved hypothetical protein [Ixodes scapularis]/gi|215504860|gb|EEC14354.1| conserved hypothetical protein [Ixodes scapularis]	Ixodes scapularis/Ixodes scapularis			IPR013783;noIPR;noIPR;noIPR;noIPR;noIPR;noIPR;noIPR;noIPR;IPR035986;IPR035986;IPR035986;IPR035986
TRINITY_DN100087_c1_g1_i2	conserved hypothetical protein	3423	1	0.0E0	70.39%	gi|241701243|ref|XP_002411911.1|conserved hypothetical protein [Ixodes scapularis]/gi|215504860|gb|EEC14354.1| conserved hypothetical protein [Ixodes scapularis]	Ixodes scapularis/Ixodes scapularis			IPR013783;noIPR;noIPR;noIPR;noIPR;noIPR;noIPR;noIPR;noIPR;IPR035986;IPR035986;IPR035986;IPR035986
TRINITY_DN100087_c1_g1_i3	conserved hypothetical protein	979	1	8.0E-36	55.27%	gi|241701243|ref|XP_002411911.1|conserved hypothetical protein [Ixodes scapularis]/gi|215504860|gb|EEC14354.1| conserved hypothetical protein [Ixodes scapularis]	Ixodes scapularis/Ixodes scapularis			IPR013783;noIPR;noIPR;IPR029865;noIPR
TRINITY_DN100088_c4_g2_i1	gpi inositol deacylase pgap1, putative	3953	1	7.2E-152	62.35%	gi|241570296|ref|XP_002402680.1|gpi inositol deacylase pgap1, putative [Ixodes scapularis]/gi|215502062|gb|EEC11556.1| gpi inositol deacylase pgap1, putative [Ixodes scapularis]	Ixodes scapularis/Ixodes scapularis			IPR029058;IPR012908;IPR039529;IPR029058
TRINITY_DN100088_c4_g2_i2	gpi inositol deacylase pgap1, putative	3125	1	1.2E-96	75.91%	gi|241570296|ref|XP_002402680.1|gpi inositol deacylase pgap1, putative [Ixodes scapularis]/gi|215502062|gb|EEC11556.1| gpi inositol deacylase pgap1, putative [Ixodes scapularis]	Ixodes scapularis/Ixodes scapularis			IPR012908;IPR029058;IPR039529;IPR029058
TRINITY_DN100088_c4_g2_i3	gpi inositol deacylase pgap1, putative	4376	1	6.7E-175	59.19%	gi|241570296|ref|XP_002402680.1|gpi inositol deacylase pgap1, putative [Ixodes scapularis]/gi|215502062|gb|EEC11556.1| gpi inositol deacylase pgap1, putative [Ixodes scapularis]	Ixodes scapularis/Ixodes scapularis			IPR012908;IPR029058;IPR039529;IPR029058
TRINITY_DN100088_c4_g2_i4	GPI inositol-deacylase-like	583	1	2.7E-23	55.23%	gi|1238862991|ref|XP_022247739.1|GPI inositol-deacylase-like [Limulus polyphemus]/gi|1238862993|ref|XP_022247740.1| GPI inositol-deacylase-like [Limulus polyphemus]/gi|1238862995|ref|XP_022247741.1| GPI inositol-deacylase-like [Limulus polyphemus]/gi|1238862997|ref|XP_022247742.1| GPI inositol-deacylase-like [Limulus polyphemus]	Limulus polyphemus/Limulus polyphemus/Limulus polyphemus/Limulus polyphemus
TRINITY_DN100090_c3_g1_i1	conserved hypothetical protein	1242	1	4.9E-147	86.92%	gi|241999710|ref|XP_002434498.1|conserved hypothetical protein [Ixodes scapularis]/gi|215497828|gb|EEC07322.1| conserved hypothetical protein [Ixodes scapularis]	Ixodes scapularis/Ixodes scapularis			noIPR;IPR039868
TRINITY_DN100090_c3_g1_i2	conserved hypothetical protein	3628	1	0.0E0	92.78%	gi|241999710|ref|XP_002434498.1|conserved hypothetical protein [Ixodes scapularis]/gi|215497828|gb|EEC07322.1| conserved hypothetical protein [Ixodes scapularis]	Ixodes scapularis/Ixodes scapularis			IPR013636;noIPR;IPR039868
TRINITY_DN100090_c3_g1_i4	conserved hypothetical protein	3333	1	0.0E0	92.78%	gi|241999710|ref|XP_002434498.1|conserved hypothetical protein [Ixodes scapularis]/gi|215497828|gb|EEC07322.1| conserved hypothetical protein [Ixodes scapularis]	Ixodes scapularis/Ixodes scapularis			IPR013636;noIPR;IPR039868
TRINITY_DN100090_c3_g1_i5	conserved hypothetical protein	3628	1	0.0E0	92.78%	gi|241999710|ref|XP_002434498.1|conserved hypothetical protein [Ixodes scapularis]/gi|215497828|gb|EEC07322.1| conserved hypothetical protein [Ixodes scapularis]	Ixodes scapularis/Ixodes scapularis			IPR013636;noIPR;IPR039868
TRINITY_DN100090_c3_g1_i7	conserved hypothetical protein	2011	1	1.7E-189	94.81%	gi|241999710|ref|XP_002434498.1|conserved hypothetical protein [Ixodes scapularis]/gi|215497828|gb|EEC07322.1| conserved hypothetical protein [Ixodes scapularis]	Ixodes scapularis/Ixodes scapularis			IPR013636;IPR039868
TRINITY_DN100091_c5_g1_i1	STE20-related kinase adapter protein alpha-like isoform X2	1383	1	1.8E-25	58.75%	gi|1238835645|ref|XP_022237122.1|STE20-related kinase adapter protein alpha-like isoform X2 [Limulus polyphemus]	Limulus polyphemus			IPR000719;noIPR;noIPR;IPR000719;IPR011009
TRINITY_DN100091_c5_g1_i2	STE20-related kinase adapter protein alpha-like isoform X2	1384	1	1.8E-25	58.75%	gi|1238835645|ref|XP_022237122.1|STE20-related kinase adapter protein alpha-like isoform X2 [Limulus polyphemus]	Limulus polyphemus			IPR000719;noIPR;noIPR;IPR000719;IPR011009
TRINITY_DN100091_c5_g1_i3	STE20-related kinase adapter protein alpha-like isoform X2	1113	1	3.6E-32	61.54%	gi|1238835645|ref|XP_022237122.1|STE20-related kinase adapter protein alpha-like isoform X2 [Limulus polyphemus]	Limulus polyphemus			IPR000719;noIPR;noIPR;IPR000719;IPR011009
TRINITY_DN100092_c2_g1_i1	conserved hypothetical protein	3049	1	0.0E0	84.72%	gi|241724885|ref|XP_002404359.1|conserved hypothetical protein [Ixodes scapularis]/gi|215505408|gb|EEC14902.1| conserved hypothetical protein [Ixodes scapularis]	Ixodes scapularis/Ixodes scapularis			IPR022113;IPR039877
TRINITY_DN100092_c2_g1_i2	conserved hypothetical protein	7897	1	0.0E0	81.64%	gi|241724885|ref|XP_002404359.1|conserved hypothetical protein [Ixodes scapularis]/gi|215505408|gb|EEC14902.1| conserved hypothetical protein [Ixodes scapularis]	Ixodes scapularis/Ixodes scapularis			IPR022113;noIPR;noIPR;noIPR;noIPR;noIPR;noIPR;noIPR;noIPR;noIPR;noIPR;noIPR;noIPR;noIPR;noIPR;noIPR;noIPR;noIPR;noIPR;IPR039877
TRINITY_DN100093_c6_g1_i1	hypothetical protein IscW_ISCW023844	1599	1	1.6E-9	55.17%	gi|241780039|ref|XP_002400064.1|hypothetical protein IscW_ISCW023844 [Ixodes scapularis]/gi|215510669|gb|EEC20122.1| hypothetical protein IscW_ISCW023844 [Ixodes scapularis]	Ixodes scapularis/Ixodes scapularis			noIPR
TRINITY_DN100093_c6_g1_i3	conserved hypothetical protein	772	1	4.1E-11	69.77%	gi|241576101|ref|XP_002403323.1|conserved hypothetical protein [Ixodes scapularis]/gi|215502198|gb|EEC11692.1| conserved hypothetical protein [Ixodes scapularis]	Ixodes scapularis/Ixodes scapularis			noIPR
TRINITY_DN100093_c6_g1_i4	conserved hypothetical protein	780	1	3.2E-11	69.77%	gi|241576101|ref|XP_002403323.1|conserved hypothetical protein [Ixodes scapularis]/gi|215502198|gb|EEC11692.1| conserved hypothetical protein [Ixodes scapularis]	Ixodes scapularis/Ixodes scapularis			noIPR;noIPR;noIPR
TRINITY_DN100094_c5_g1_i1	hypothetical protein IscW_ISCW012209	1580	1	1.5E-20	66.67%	gi|241747362|ref|XP_002414319.1|hypothetical protein IscW_ISCW012209 [Ixodes scapularis]/gi|215508173|gb|EEC17627.1| hypothetical protein IscW_ISCW012209 [Ixodes scapularis]	Ixodes scapularis/Ixodes scapularis			IPR001878
TRINITY_DN100094_c5_g1_i2	hypothetical protein IscW_ISCW012209	896	1	1.1E-18	64.76%	gi|241747362|ref|XP_002414319.1|hypothetical protein IscW_ISCW012209 [Ixodes scapularis]/gi|215508173|gb|EEC17627.1| hypothetical protein IscW_ISCW012209 [Ixodes scapularis]	Ixodes scapularis/Ixodes scapularis			IPR001878
TRINITY_DN100094_c5_g1_i3	hypothetical protein IscW_ISCW012209	1834	1	1.8E-20	66.67%	gi|241747362|ref|XP_002414319.1|hypothetical protein IscW_ISCW012209 [Ixodes scapularis]/gi|215508173|gb|EEC17627.1| hypothetical protein IscW_ISCW012209 [Ixodes scapularis]	Ixodes scapularis/Ixodes scapularis			IPR001878
TRINITY_DN100095_c0_g1_i2	beta-tubulin, putative	918	1	4.7E-155	100.00%	gi|241248926|ref|XP_002403010.1|beta-tubulin, putative [Ixodes scapularis]/gi|215496436|gb|EEC06076.1| beta-tubulin, putative [Ixodes scapularis]	Ixodes scapularis/Ixodes scapularis	EC:3.6.1.15	Nucleoside-triphosphate phosphatase	IPR000217;IPR002453;IPR036525;IPR037103;IPR003008;IPR018316;IPR023123;noIPR;noIPR;IPR002453;IPR000217;noIPR;IPR008280;IPR036525
TRINITY_DN100095_c0_g4_i2	beta tubulin	655	1	7.3E-110	100.00%	gi|241151397|ref|XP_002406664.1|beta tubulin [Ixodes scapularis]/gi|215493876|gb|EEC03517.1| beta tubulin [Ixodes scapularis]	Ixodes scapularis/Ixodes scapularis	EC:3.6.1.15	Nucleoside-triphosphate phosphatase	IPR000217;IPR002453;IPR036525;IPR003008;noIPR;IPR000217;IPR036525
TRINITY_DN100097_c1_g1_i1	Replication protein A 70 kDa DNA-binding subunit	878	1	7.9E-27	51.02%	gi|970639495|gb|KUF82506.1|Replication protein A 70 kDa DNA-binding subunit [Phytophthora nicotianae]	Phytophthora nicotianae
TRINITY_DN100097_c1_g1_i2	Replication protein A 70 kDa DNA-binding subunit	935	1	1.3E-24	56.55%	gi|970639495|gb|KUF82506.1|Replication protein A 70 kDa DNA-binding subunit [Phytophthora nicotianae]	Phytophthora nicotianae
TRINITY_DN100097_c1_g1_i5	Replication protein A 70 kDa DNA-binding subunit	1027	1	9.3E-27	51.02%	gi|970639495|gb|KUF82506.1|Replication protein A 70 kDa DNA-binding subunit [Phytophthora nicotianae]	Phytophthora nicotianae
TRINITY_DN100099_c2_g1_i1	endoplasmic reticulum metallopeptidase 1-like	7033	1	1.1E-195	60.85%	gi|1238843917|ref|XP_022240452.1|endoplasmic reticulum metallopeptidase 1-like [Limulus polyphemus]	Limulus polyphemus			IPR007484;noIPR;noIPR;noIPR;noIPR;noIPR
TRINITY_DN100099_c2_g1_i3	endoplasmic reticulum metallopeptidase 1-like	7095	1	1.1E-195	60.85%	gi|1238843917|ref|XP_022240452.1|endoplasmic reticulum metallopeptidase 1-like [Limulus polyphemus]	Limulus polyphemus			IPR007484;noIPR;noIPR;noIPR;noIPR;noIPR
TRINITY_DN100099_c2_g1_i4	ERMP1 protein, putative	692	1	2.6E-49	64.94%	gi|241814845|ref|XP_002416541.1|ERMP1 protein, putative [Ixodes scapularis]/gi|215511005|gb|EEC20458.1| ERMP1 protein, putative [Ixodes scapularis]	Ixodes scapularis/Ixodes scapularis			noIPR;noIPR
TRINITY_DN100099_c2_g1_i5	ERMP1 protein, putative	4202	1	8.8E-15	83.61%	gi|241814845|ref|XP_002416541.1|ERMP1 protein, putative [Ixodes scapularis]/gi|215511005|gb|EEC20458.1| ERMP1 protein, putative [Ixodes scapularis]	Ixodes scapularis/Ixodes scapularis
TRINITY_DN100100_c1_g1_i1	PREDICTED: uncharacterized protein LOC107046672	640	1	1.2E-16	72.09%	gi|970916760|ref|XP_015124830.1|PREDICTED: uncharacterized protein LOC107046672 [Diachasma alloeum]	Diachasma alloeum			IPR027806;noIPR;noIPR
TRINITY_DN100100_c1_g1_i2	PREDICTED: uncharacterized protein LOC107046672	798	1	4.0E-17	73.26%	gi|970916760|ref|XP_015124830.1|PREDICTED: uncharacterized protein LOC107046672 [Diachasma alloeum]	Diachasma alloeum			IPR027806;noIPR;noIPR
TRINITY_DN100100_c1_g1_i3	PREDICTED: uncharacterized protein LOC107046672	594	1	4.0E-14	72.15%	gi|970916760|ref|XP_015124830.1|PREDICTED: uncharacterized protein LOC107046672 [Diachasma alloeum]	Diachasma alloeum			IPR027806;noIPR;noIPR
TRINITY_DN100100_c1_g1_i5	PREDICTED: uncharacterized protein LOC107046672	640	1	7.8E-16	72.09%	gi|970916760|ref|XP_015124830.1|PREDICTED: uncharacterized protein LOC107046672 [Diachasma alloeum]	Diachasma alloeum			IPR027806;noIPR;noIPR
TRINITY_DN100100_c2_g1_i2	PREDICTED: uncharacterized protein LOC105446246	3748	1	6.6E-14	57.78%	gi|780144293|ref|XP_011681111.1|PREDICTED: uncharacterized protein LOC105446246 [Strongylocentrotus purpuratus]	Strongylocentrotus purpuratus			IPR011604;IPR019080;noIPR;noIPR;IPR011335
TRINITY_DN100100_c2_g1_i4	hypothetical protein IscW_ISCW024514	2105	1	3.2E-13	67.07%	gi|241628443|ref|XP_002408161.1|hypothetical protein IscW_ISCW024514 [Ixodes scapularis]/gi|215501140|gb|EEC10634.1| hypothetical protein IscW_ISCW024514 [Ixodes scapularis]	Ixodes scapularis/Ixodes scapularis			IPR011604;IPR019080;noIPR;noIPR;IPR011335
TRINITY_DN100100_c2_g1_i5	PREDICTED: uncharacterized protein LOC105446246	3183	1	5.6E-14	57.78%	gi|780144293|ref|XP_011681111.1|PREDICTED: uncharacterized protein LOC105446246 [Strongylocentrotus purpuratus]	Strongylocentrotus purpuratus			IPR011604;IPR019080;noIPR;noIPR;IPR011335
TRINITY_DN100100_c2_g1_i6	PREDICTED: uncharacterized protein LOC105446246	3063	1	5.4E-14	57.78%	gi|780144293|ref|XP_011681111.1|PREDICTED: uncharacterized protein LOC105446246 [Strongylocentrotus purpuratus]	Strongylocentrotus purpuratus			IPR011604;IPR019080;noIPR;noIPR;IPR011335
TRINITY_DN100102_c3_g1_i1	colorectal mutant cancer protein-like isoform X2	5741	1	1.3E-223	66.19%	gi|1238860402|ref|XP_022246747.1|colorectal mutant cancer protein-like isoform X2 [Limulus polyphemus]	Limulus polyphemus			noIPR;IPR019536;IPR002048;noIPR;noIPR;noIPR;noIPR;noIPR;noIPR;noIPR;noIPR;noIPR;IPR040171;IPR002048;IPR002048;IPR002048;IPR011992
TRINITY_DN100102_c3_g1_i2	cyclic-AMP-dependent transcription factor atf2, putative	812	1	7.9E-13	100.00%	gi|241613935|ref|XP_002407471.1|cyclic-AMP-dependent transcription factor atf2, putative [Ixodes scapularis]/gi|215502820|gb|EEC12314.1| cyclic-AMP-dependent transcription factor atf2, putative [Ixodes scapularis]	Ixodes scapularis/Ixodes scapularis			noIPR;noIPR;noIPR;IPR011992
TRINITY_DN100104_c1_g2_i1	Down syndrome cell adhesion molecule-like protein Dscam2	2731	1	1.1E-122	54.76%	gi|391343779|ref|XP_003746183.1|PREDICTED: Down syndrome cell adhesion molecule-like protein Dscam2 [Galendromus occidentalis]	Galendromus occidentalis			IPR013783;IPR013783;IPR003961;IPR013783;IPR013783;IPR013098;IPR013783;noIPR;noIPR;noIPR;noIPR;noIPR;IPR003961;IPR003961;IPR003961;IPR003961;IPR007110;IPR003961;IPR003961;IPR003961;IPR003961;IPR036116;IPR036116;IPR036179
TRINITY_DN100105_c4_g1_i3	cuticular protein, putative	5762	1	5.9E-38	79.10%	gi|241165089|ref|XP_002409611.1|cuticular protein, putative [Ixodes scapularis]/gi|215494596|gb|EEC04237.1| cuticular protein, putative [Ixodes scapularis]	Ixodes scapularis/Ixodes scapularis			IPR002557;noIPR;noIPR;IPR002557;IPR036508
TRINITY_DN100106_c1_g1_i1	serine protease inhibitor 16 RmS16	2400	1	1.9E-216	99.75%	gi|568215841|gb|AHC98667.1|serine protease inhibitor 16 RmS16 [Rhipicephalus microplus]	Rhipicephalus microplus			noIPR;IPR023796;noIPR;IPR000215;noIPR;IPR036186
TRINITY_DN100107_c0_g1_i1	conserved hypothetical protein	828	1	4.4E-51	82.98%	gi|241714928|ref|XP_002413531.1|conserved hypothetical protein [Ixodes scapularis]/gi|215507345|gb|EEC16839.1| conserved hypothetical protein [Ixodes scapularis]	Ixodes scapularis/Ixodes scapularis			noIPR;IPR036865;IPR001251;IPR011074;noIPR;noIPR;IPR001251;IPR036273;IPR036865
TRINITY_DN100107_c0_g1_i2	conserved hypothetical protein	646	1	7.6E-43	83.06%	gi|241714928|ref|XP_002413531.1|conserved hypothetical protein [Ixodes scapularis]/gi|215507345|gb|EEC16839.1| conserved hypothetical protein [Ixodes scapularis]	Ixodes scapularis/Ixodes scapularis			noIPR;IPR036865;IPR001251;IPR011074;noIPR;noIPR;IPR001251;IPR036273;IPR036865
TRINITY_DN100107_c0_g1_i3	conserved hypothetical protein	1459	1	9.3E-73	81.73%	gi|241714928|ref|XP_002413531.1|conserved hypothetical protein [Ixodes scapularis]/gi|215507345|gb|EEC16839.1| conserved hypothetical protein [Ixodes scapularis]	Ixodes scapularis/Ixodes scapularis			noIPR;IPR011074;IPR036865;IPR001251;noIPR;noIPR;noIPR;IPR001251;IPR001251;IPR036273;IPR036865
TRINITY_DN100107_c0_g1_i4	conserved hypothetical protein	1452	1	7.1E-73	81.73%	gi|241714928|ref|XP_002413531.1|conserved hypothetical protein [Ixodes scapularis]/gi|215507345|gb|EEC16839.1| conserved hypothetical protein [Ixodes scapularis]	Ixodes scapularis/Ixodes scapularis			noIPR;IPR001251;IPR036865;IPR011074;noIPR;noIPR;noIPR;IPR001251;IPR001251;IPR036273;IPR036865
TRINITY_DN100107_c1_g1_i3	SEC14L3 protein, putative	2193	1	7.1E-8	66.15%	gi|241747385|ref|XP_002405631.1|SEC14L3 protein, putative [Ixodes scapularis]/gi|215505887|gb|EEC15381.1| SEC14L3 protein, putative [Ixodes scapularis]	Ixodes scapularis/Ixodes scapularis
TRINITY_DN100108_c1_g1_i1	conserved hypothetical protein	7482	1	0.0E0	69.37%	gi|241171679|ref|XP_002410692.1|conserved hypothetical protein [Ixodes scapularis]/gi|215494929|gb|EEC04570.1| conserved hypothetical protein [Ixodes scapularis]	Ixodes scapularis/Ixodes scapularis			noIPR;IPR029651
TRINITY_DN100108_c1_g1_i2	conserved hypothetical protein	7024	1	0.0E0	70.07%	gi|241171679|ref|XP_002410692.1|conserved hypothetical protein [Ixodes scapularis]/gi|215494929|gb|EEC04570.1| conserved hypothetical protein [Ixodes scapularis]	Ixodes scapularis/Ixodes scapularis			IPR029651;noIPR
TRINITY_DN100109_c4_g1_i2	transcription factor AP-2-epsilon-like isoform X1	4951	1	2.7E-148	68.43%	gi|1316150020|ref|XP_023220158.1|transcription factor AP-2-epsilon-like isoform X1 [Centruroides sculpturatus]	Centruroides sculpturatus			IPR013854;IPR013854;noIPR;noIPR;noIPR;noIPR;noIPR;noIPR;noIPR;noIPR;IPR004979;noIPR
TRINITY_DN100110_c7_g1_i1	synaptotagmin V, putative	3319	1	1.4E-60	98.32%	gi|241739225|ref|XP_002414097.1|synaptotagmin V, putative [Ixodes scapularis]/gi|215507951|gb|EEC17405.1| synaptotagmin V, putative [Ixodes scapularis]	Ixodes scapularis/Ixodes scapularis			IPR000008;IPR000008;IPR035892;IPR015427;noIPR;IPR000008;noIPR
TRINITY_DN100111_c4_g2_i2	U8-agatoxin-Ao1a-like	543	1	1.8E-13	73.85%	gi|1316170125|ref|XP_023230478.1|U8-agatoxin-Ao1a-like [Centruroides sculpturatus]/gi|1316170127|ref|XP_023230479.1| U8-agatoxin-Ao1a-like [Centruroides sculpturatus]	Centruroides sculpturatus/Centruroides sculpturatus			IPR004214;IPR004169
TRINITY_DN100112_c2_g1_i12	WD-repeat protein, putative	4642	1	1.2E-195	63.78%	gi|242002834|ref|XP_002436060.1|WD-repeat protein, putative [Ixodes scapularis]/gi|215499396|gb|EEC08890.1| WD-repeat protein, putative, partial [Ixodes scapularis]	Ixodes scapularis/Ixodes scapularis			IPR022100;IPR036910;IPR015943;IPR024977;IPR015943;IPR001680;noIPR;noIPR;noIPR;noIPR;IPR001680;IPR017986;IPR001680;noIPR;IPR036322;IPR011044
TRINITY_DN100112_c2_g1_i13	WD-repeat protein, putative	4415	1	7.2E-185	63.27%	gi|242002834|ref|XP_002436060.1|WD-repeat protein, putative [Ixodes scapularis]/gi|215499396|gb|EEC08890.1| WD-repeat protein, putative, partial [Ixodes scapularis]	Ixodes scapularis/Ixodes scapularis			IPR022100;IPR036910;IPR015943;IPR024977;IPR001680;noIPR;noIPR;noIPR;IPR017986;IPR001680;noIPR;IPR036322
TRINITY_DN100112_c2_g1_i3	secreted protein, putative	576	1	2.7E-7	85.00%	gi|242002836|ref|XP_002436061.1|secreted protein, putative [Ixodes scapularis]/gi|215499397|gb|EEC08891.1| secreted protein, putative, partial [Ixodes scapularis]	Ixodes scapularis/Ixodes scapularis
TRINITY_DN100112_c2_g1_i5	secreted protein, putative	2322	1	1.9E-99	67.04%	gi|242002836|ref|XP_002436061.1|secreted protein, putative [Ixodes scapularis]/gi|215499397|gb|EEC08891.1| secreted protein, putative, partial [Ixodes scapularis]	Ixodes scapularis/Ixodes scapularis			IPR012913;IPR009011;noIPR;noIPR;noIPR;noIPR;noIPR;noIPR
TRINITY_DN100112_c2_g1_i6	WD-repeat protein, putative	4728	1	1.3E-195	63.78%	gi|242002834|ref|XP_002436060.1|WD-repeat protein, putative [Ixodes scapularis]/gi|215499396|gb|EEC08890.1| WD-repeat protein, putative, partial [Ixodes scapularis]	Ixodes scapularis/Ixodes scapularis			IPR022100;IPR015943;IPR036910;IPR024977;IPR015943;IPR001680;noIPR;noIPR;noIPR;noIPR;IPR001680;IPR017986;IPR001680;noIPR;IPR036322;IPR011044
TRINITY_DN100112_c2_g1_i7	WD-repeat protein, putative	4565	1	5.7E-185	63.27%	gi|242002834|ref|XP_002436060.1|WD-repeat protein, putative [Ixodes scapularis]/gi|215499396|gb|EEC08890.1| WD-repeat protein, putative, partial [Ixodes scapularis]	Ixodes scapularis/Ixodes scapularis			IPR022100;IPR024977;IPR036910;IPR001680;IPR015943;noIPR;noIPR;noIPR;noIPR;IPR017986;IPR001680;noIPR;IPR036322
TRINITY_DN100112_c2_g1_i8	WD-repeat protein, putative	4651	1	5.8E-185	63.27%	gi|242002834|ref|XP_002436060.1|WD-repeat protein, putative [Ixodes scapularis]/gi|215499396|gb|EEC08890.1| WD-repeat protein, putative, partial [Ixodes scapularis]	Ixodes scapularis/Ixodes scapularis			IPR022100;IPR024977;IPR036910;IPR001680;IPR015943;noIPR;noIPR;noIPR;noIPR;IPR017986;IPR001680;noIPR;IPR036322
TRINITY_DN100112_c2_g1_i9	secreted protein, putative	878	1	3.3E-25	85.00%	gi|242002836|ref|XP_002436061.1|secreted protein, putative [Ixodes scapularis]/gi|215499397|gb|EEC08891.1| secreted protein, putative, partial [Ixodes scapularis]	Ixodes scapularis/Ixodes scapularis			IPR009011;IPR012913;noIPR;noIPR
TRINITY_DN100113_c1_g1_i1	fucose-1-phosphate guanylyltransferase-like	1342	1	4.0E-86	61.54%	gi|926622169|ref|XP_013776457.1|fucose-1-phosphate guanylyltransferase-like [Limulus polyphemus]	Limulus polyphemus			IPR012887;noIPR
TRINITY_DN100113_c1_g1_i2	fucose-1-phosphate guanylyltransferase-like	1342	1	2.6E-85	61.54%	gi|926622169|ref|XP_013776457.1|fucose-1-phosphate guanylyltransferase-like [Limulus polyphemus]	Limulus polyphemus			IPR012887;noIPR
TRINITY_DN100113_c1_g1_i3	fucose-1-phosphate guanylyltransferase-like	1288	1	2.6E-82	61.18%	gi|926622169|ref|XP_013776457.1|fucose-1-phosphate guanylyltransferase-like [Limulus polyphemus]	Limulus polyphemus			IPR012887;noIPR
TRINITY_DN100114_c6_g1_i1	ornithine decarboxylase, putative	2323	1	6.2E-111	74.63%	gi|241997404|ref|XP_002433351.1|ornithine decarboxylase, putative [Ixodes scapularis]/gi|215490774|gb|EEC00415.1| ornithine decarboxylase, putative [Ixodes scapularis]	Ixodes scapularis/Ixodes scapularis			IPR002433;IPR000183;IPR022643;IPR022644;IPR009006;IPR029066;IPR002433;noIPR;noIPR;IPR009006;IPR029066
TRINITY_DN100114_c6_g1_i2	ornithine decarboxylase, putative	610	1	1.3E-47	72.67%	gi|241607215|ref|XP_002405819.1|ornithine decarboxylase, putative [Ixodes scapularis]/gi|215500690|gb|EEC10184.1| ornithine decarboxylase, putative, partial [Ixodes scapularis]	Ixodes scapularis/Ixodes scapularis			IPR002433;IPR022644;IPR029066;noIPR;IPR002433;IPR029066
TRINITY_DN100114_c6_g1_i3	ornithine decarboxylase, putative	808	1	2.2E-47	72.67%	gi|241607215|ref|XP_002405819.1|ornithine decarboxylase, putative [Ixodes scapularis]/gi|215500690|gb|EEC10184.1| ornithine decarboxylase, putative, partial [Ixodes scapularis]	Ixodes scapularis/Ixodes scapularis			IPR002433;IPR022644;IPR029066;IPR002433;noIPR;IPR029066
TRINITY_DN100114_c6_g1_i4	ornithine decarboxylase, putative	2474	1	6.6E-111	74.63%	gi|241997404|ref|XP_002433351.1|ornithine decarboxylase, putative [Ixodes scapularis]/gi|215490774|gb|EEC00415.1| ornithine decarboxylase, putative [Ixodes scapularis]	Ixodes scapularis/Ixodes scapularis			IPR002433;IPR000183;IPR022643;IPR022644;IPR009006;IPR029066;IPR002433;noIPR;noIPR;IPR009006;IPR029066
TRINITY_DN100116_c1_g1_i1	Down syndrome cell adhesion molecule homolog	5212	1	0.0E0	65.67%	gi|1078807375|ref|XP_018495817.1|PREDICTED: Down syndrome cell adhesion molecule homolog [Galendromus occidentalis]	Galendromus occidentalis			IPR013783;IPR013098;IPR013783;IPR013783;IPR013783;IPR013783;IPR013783;IPR013783;IPR013783;IPR003961;IPR013783;IPR013783;noIPR;IPR013783;IPR013783;noIPR;noIPR;noIPR;IPR003961;IPR007110;IPR007110;IPR007110;IPR007110;IPR007110;IPR003961;IPR003961;IPR007110;IPR007110;IPR007110;IPR003961;IPR003961;IPR003961;noIPR;IPR003961;noIPR;IPR003961;noIPR;noIPR;noIPR;noIPR;IPR036116;IPR036116;IPR036179;IPR036179…
TRINITY_DN100116_c1_g1_i2	Down syndrome cell adhesion molecule homolog	4701	1	0.0E0	65.96%	gi|1078807375|ref|XP_018495817.1|PREDICTED: Down syndrome cell adhesion molecule homolog [Galendromus occidentalis]	Galendromus occidentalis			IPR003961;IPR013098;IPR013783;IPR013783;IPR013783;IPR013783;IPR013783;IPR013783;noIPR;IPR013783;IPR013783;IPR013783;IPR013783;IPR013783;IPR013783;noIPR;IPR003961;IPR007110;IPR007110;IPR007110;IPR007110;IPR007110;IPR003961;IPR003961;IPR007110;IPR007110;IPR007110;IPR003961;IPR003961;IPR003961;noIPR;IPR003961;noIPR;IPR003961;noIPR;noIPR;noIPR;noIPR;IPR036179;IPR036116;IPR036116;IPR036179;IPR036179;I…
TRINITY_DN100117_c0_g1_i1	serine/threonine-protein kinase RIO2	788	1	2.7E-10	72.00%	gi|805786223|ref|XP_012140576.1|PREDICTED: LOW QUALITY PROTEIN: serine/threonine-protein kinase RIO2 [Megachile rotundata]	Megachile rotundata			noIPR;noIPR;noIPR;noIPR
TRINITY_DN100117_c0_g1_i2	serine/threonine-protein kinase RIO2	716	1	2.5E-10	72.00%	gi|805786223|ref|XP_012140576.1|PREDICTED: LOW QUALITY PROTEIN: serine/threonine-protein kinase RIO2 [Megachile rotundata]	Megachile rotundata			noIPR;noIPR;noIPR;noIPR
TRINITY_DN100117_c0_g2_i1	serine/threonine-protein kinase RIO2-like	1365	1	1.2E-138	87.10%	gi|1316163170|ref|XP_023226852.1|serine/threonine-protein kinase RIO2-like [Centruroides sculpturatus]	Centruroides sculpturatus	EC:2.7.11	Transferring phosphorus-containing groups	noIPR;IPR015285;noIPR;IPR036388;noIPR;noIPR;noIPR;noIPR;noIPR;noIPR;IPR030484;IPR011009;IPR036390
TRINITY_DN100118_c0_g1_i3	tigger transposable element-derived protein 4-like	1330	1	1.7E-73	70.61%	gi|762137688|ref|XP_011452139.1|PREDICTED: tigger transposable element-derived protein 4-like [Crassostrea gigas]	Crassostrea gigas			noIPR;IPR007889;IPR006600;IPR004875;noIPR;noIPR;noIPR;IPR006600;IPR009057;IPR009057
TRINITY_DN100118_c0_g1_i4	tigger transposable element-derived protein 4-like	955	1	6.0E-20	63.71%	gi|762137688|ref|XP_011452139.1|PREDICTED: tigger transposable element-derived protein 4-like [Crassostrea gigas]	Crassostrea gigas			IPR006600;noIPR;IPR007889;noIPR;noIPR;noIPR;IPR006600;IPR009057;IPR009057
TRINITY_DN100118_c0_g3_i1	tigger transposable element-derived protein 4-like	529	1	5.9E-17	72.37%	gi|328706772|ref|XP_001946731.2|PREDICTED: tigger transposable element-derived protein 4-like [Acyrthosiphon pisum]	Acyrthosiphon pisum			IPR004875;noIPR
TRINITY_DN100118_c1_g2_i3	RNA-directed DNA polymerase from mobile element jockey-like	1040	1	2.7E-26	57.98%	gi|1005420826|ref|XP_015758992.1|PREDICTED: RNA-directed DNA polymerase from mobile element jockey-like [Acropora digitifera]	Acropora digitifera			IPR000477;noIPR;IPR000477;noIPR
TRINITY_DN100118_c1_g3_i1	TPA_inf: nucleoside diphosphate-sugar hydrolase	597	1	3.0E-17	98.00%	gi|325303580|tpg|DAA34229.1|TPA_inf: nucleoside diphosphate-sugar hydrolase [Amblyomma variegatum]	Amblyomma variegatum			noIPR
TRINITY_DN100118_c1_g3_i3	TPA_inf: nucleoside diphosphate-sugar hydrolase	617	1	3.1E-17	98.00%	gi|325303580|tpg|DAA34229.1|TPA_inf: nucleoside diphosphate-sugar hydrolase [Amblyomma variegatum]	Amblyomma variegatum
TRINITY_DN100118_c1_g3_i4	TPA_inf: nucleoside diphosphate-sugar hydrolase	590	1	2.9E-17	98.00%	gi|325303580|tpg|DAA34229.1|TPA_inf: nucleoside diphosphate-sugar hydrolase [Amblyomma variegatum]	Amblyomma variegatum
TRINITY_DN100119_c2_g1_i1	guanine nucleotide-binding protein subunit beta-5	3093	1	2.6E-157	94.83%	gi|1009541261|ref|XP_015906972.1|guanine nucleotide-binding protein subunit beta-5 [Parasteatoda tepidariorum]	Parasteatoda tepidariorum			IPR001632;IPR020472;IPR001680;IPR015943;noIPR;IPR016346;noIPR;IPR001680;IPR001680;IPR001680;IPR017986;IPR001680;IPR001680;IPR001680;noIPR;IPR036322
TRINITY_DN100119_c2_g1_i2	guanine nucleotide-binding protein subunit beta-5	2973	1	3.1E-155	94.54%	gi|1009541261|ref|XP_015906972.1|guanine nucleotide-binding protein subunit beta-5 [Parasteatoda tepidariorum]	Parasteatoda tepidariorum			IPR020472;IPR001632;noIPR;IPR001680;IPR015943;noIPR;IPR016346;IPR001680;IPR001680;IPR017986;IPR001680;IPR001680;IPR001680;IPR001680;noIPR;IPR036322
TRINITY_DN100121_c2_g1_i1	oxidation resistance protein	964	1	3.1E-64	96.12%	gi|1318866917|gb|AUJ88034.1|oxidation resistance protein [Rhipicephalus microplus]	Rhipicephalus microplus			IPR006571;noIPR;noIPR
TRINITY_DN100121_c2_g1_i2	oxidation resistance protein	908	1	2.9E-64	96.12%	gi|1318866917|gb|AUJ88034.1|oxidation resistance protein [Rhipicephalus microplus]	Rhipicephalus microplus			IPR006571;noIPR;noIPR
TRINITY_DN100121_c2_g1_i3	oxidation resistance protein	911	1	2.3E-69	98.47%	gi|1318866917|gb|AUJ88034.1|oxidation resistance protein [Rhipicephalus microplus]	Rhipicephalus microplus			IPR006571;noIPR;noIPR
TRINITY_DN100121_c2_g1_i4	oxidation resistance protein	778	1	2.7E-42	97.67%	gi|1318866917|gb|AUJ88034.1|oxidation resistance protein [Rhipicephalus microplus]	Rhipicephalus microplus			IPR006571;noIPR;noIPR
TRINITY_DN100121_c3_g1_i1	oxidation resistance protein	715	1	1.4E-98	84.87%	gi|1318866917|gb|AUJ88034.1|oxidation resistance protein [Rhipicephalus microplus]	Rhipicephalus microplus			noIPR;noIPR;noIPR
TRINITY_DN100121_c3_g1_i2	oxidation resistance protein	742	1	6.1E-97	81.78%	gi|1318866917|gb|AUJ88034.1|oxidation resistance protein [Rhipicephalus microplus]	Rhipicephalus microplus			noIPR;noIPR;noIPR
TRINITY_DN100121_c3_g1_i3	oxidation resistance protein	590	1	1.6E-76	83.67%	gi|1318866917|gb|AUJ88034.1|oxidation resistance protein [Rhipicephalus microplus]	Rhipicephalus microplus			noIPR;noIPR;noIPR
TRINITY_DN100121_c3_g3_i1	oxidation resistance protein	1596	1	2.2E-75	72.66%	gi|1318866917|gb|AUJ88034.1|oxidation resistance protein [Rhipicephalus microplus]	Rhipicephalus microplus			IPR036779;IPR018392;noIPR;noIPR;noIPR;noIPR;noIPR;noIPR;noIPR;noIPR;noIPR;noIPR;noIPR;IPR018392;IPR018392;noIPR
TRINITY_DN100121_c3_g3_i2	oxidation resistance protein	2036	1	3.0E-117	73.23%	gi|1318866917|gb|AUJ88034.1|oxidation resistance protein [Rhipicephalus microplus]	Rhipicephalus microplus			IPR018392;IPR036779;noIPR;noIPR;noIPR;noIPR;noIPR;noIPR;noIPR;noIPR;noIPR;noIPR;noIPR;noIPR;noIPR;IPR018392;IPR018392;noIPR
TRINITY_DN100122_c1_g1_i1	conserved hypothetical protein	2746	1	3.3E-47	70.17%	gi|240963703|ref|XP_002400731.1|conserved hypothetical protein [Ixodes scapularis]/gi|215490734|gb|EEC00375.1| conserved hypothetical protein [Ixodes scapularis]	Ixodes scapularis/Ixodes scapularis			IPR036638;IPR011598;noIPR;noIPR;noIPR;noIPR;noIPR;IPR011598;IPR011598;IPR036638
TRINITY_DN100122_c1_g1_i2	conserved hypothetical protein	1755	1	2.1E-47	70.17%	gi|240963703|ref|XP_002400731.1|conserved hypothetical protein [Ixodes scapularis]/gi|215490734|gb|EEC00375.1| conserved hypothetical protein [Ixodes scapularis]	Ixodes scapularis/Ixodes scapularis			IPR036638;IPR011598;noIPR;noIPR;noIPR;noIPR;noIPR;IPR011598;IPR011598;IPR036638
TRINITY_DN100122_c1_g1_i3	conserved hypothetical protein	2776	1	3.4E-47	70.17%	gi|240963703|ref|XP_002400731.1|conserved hypothetical protein [Ixodes scapularis]/gi|215490734|gb|EEC00375.1| conserved hypothetical protein [Ixodes scapularis]	Ixodes scapularis/Ixodes scapularis			IPR036638;IPR011598;noIPR;noIPR;noIPR;noIPR;noIPR;IPR011598;IPR011598;IPR036638
TRINITY_DN100123_c2_g1_i1	solute carrier family 12 member 2-like	2563	1	2.3E-183	70.72%	gi|1238833809|ref|XP_022256408.1|solute carrier family 12 member 2-like [Limulus polyphemus]	Limulus polyphemus			IPR018491;IPR004841;noIPR;noIPR;noIPR;noIPR
TRINITY_DN100123_c2_g1_i2	conserved hypothetical protein	1500	1	1.5E-126	68.88%	gi|240978646|ref|XP_002403008.1|conserved hypothetical protein [Ixodes scapularis]/gi|215491272|gb|EEC00913.1| conserved hypothetical protein [Ixodes scapularis]	Ixodes scapularis/Ixodes scapularis			IPR004841;IPR018491;noIPR;noIPR;noIPR;noIPR
TRINITY_DN100123_c2_g1_i3	solute carrier family 12 member 2-like	2541	1	2.3E-183	70.72%	gi|1238833809|ref|XP_022256408.1|solute carrier family 12 member 2-like [Limulus polyphemus]	Limulus polyphemus			IPR018491;IPR004841;noIPR;noIPR;noIPR;noIPR
TRINITY_DN100123_c2_g1_i4	solute carrier family 12 member 2-like	1566	1	3.5E-142	68.69%	gi|1238833809|ref|XP_022256408.1|solute carrier family 12 member 2-like [Limulus polyphemus]	Limulus polyphemus			IPR018491;IPR004841;noIPR;noIPR;noIPR;noIPR
TRINITY_DN100123_c2_g4_i1	hypothetical protein IscW_ISCW008683	857	1	2.8E-45	84.68%	gi|241628413|ref|XP_002409980.1|hypothetical protein IscW_ISCW008683 [Ixodes scapularis]/gi|215503279|gb|EEC12773.1| hypothetical protein IscW_ISCW008683 [Ixodes scapularis]	Ixodes scapularis/Ixodes scapularis			IPR013612;noIPR;noIPR;noIPR
TRINITY_DN100124_c1_g1_i1	CENP-B-like protein 2	1036	1	6.4E-52	64.49%	gi|1057722545|gb|AOE48154.1|CENP-B-like protein 2 [Locusta migratoria]	Locusta migratoria			IPR004875;noIPR;IPR006600;noIPR;noIPR;IPR006600;IPR009057
TRINITY_DN100124_c1_g1_i10	centromere protein B, putative	1826	1	6.2E-50	84.85%	gi|241605870|ref|XP_002406137.1|centromere protein B, putative [Ixodes scapularis]/gi|215502630|gb|EEC12124.1| centromere protein B, putative, partial [Ixodes scapularis]	Ixodes scapularis/Ixodes scapularis			IPR004875;noIPR
TRINITY_DN100124_c1_g1_i12	CENP-B-like protein 2	893	1	2.3E-42	67.74%	gi|1057722545|gb|AOE48154.1|CENP-B-like protein 2 [Locusta migratoria]	Locusta migratoria			IPR004875;noIPR
TRINITY_DN100124_c1_g1_i15	CENP-B-like protein 2	1350	1	6.4E-76	63.08%	gi|1057722545|gb|AOE48154.1|CENP-B-like protein 2 [Locusta migratoria]	Locusta migratoria			noIPR;IPR006600;IPR004875;noIPR;IPR006600;IPR009057
TRINITY_DN100124_c1_g1_i17	CENP-B-like protein 2	860	1	2.8E-16	58.23%	gi|1057722545|gb|AOE48154.1|CENP-B-like protein 2 [Locusta migratoria]	Locusta migratoria			noIPR;noIPR;IPR006600;IPR007889;noIPR;IPR006600;IPR009057;IPR009057
TRINITY_DN100124_c1_g1_i19	centromere protein B, putative	1858	1	2.0E-51	86.36%	gi|241605870|ref|XP_002406137.1|centromere protein B, putative [Ixodes scapularis]/gi|215502630|gb|EEC12124.1| centromere protein B, putative, partial [Ixodes scapularis]	Ixodes scapularis/Ixodes scapularis			IPR004875;noIPR
TRINITY_DN100124_c1_g1_i20	centromere protein B, putative	1858	1	2.0E-51	86.36%	gi|241605870|ref|XP_002406137.1|centromere protein B, putative [Ixodes scapularis]/gi|215502630|gb|EEC12124.1| centromere protein B, putative, partial [Ixodes scapularis]	Ixodes scapularis/Ixodes scapularis			IPR004875;noIPR
TRINITY_DN100124_c1_g1_i22	CENP-B-like protein 2	1246	1	2.7E-65	64.14%	gi|1057722545|gb|AOE48154.1|CENP-B-like protein 2 [Locusta migratoria]	Locusta migratoria			IPR006600;IPR004875;noIPR;noIPR;noIPR;IPR006600;IPR009057
TRINITY_DN100124_c1_g1_i4	CENP-B-like protein 2	753	1	2.4E-16	58.23%	gi|1057722545|gb|AOE48154.1|CENP-B-like protein 2 [Locusta migratoria]	Locusta migratoria			noIPR;IPR007889;noIPR;IPR006600;noIPR;IPR006600;IPR009057;IPR009057
TRINITY_DN100124_c1_g1_i5	CENP-B-like protein 2	1023	1	1.1E-22	72.53%	gi|1057722545|gb|AOE48154.1|CENP-B-like protein 2 [Locusta migratoria]	Locusta migratoria			IPR004875;noIPR
TRINITY_DN100124_c1_g1_i7	CENP-B-like protein 2	1305	1	1.1E-75	64.53%	gi|1057722545|gb|AOE48154.1|CENP-B-like protein 2 [Locusta migratoria]	Locusta migratoria			IPR004875;noIPR
TRINITY_DN100125_c4_g1_i1	fasciclin-1-like	4013	1	3.5E-138	63.24%	gi|926633883|ref|XP_013782766.1|fasciclin-1-like [Limulus polyphemus]	Limulus polyphemus			IPR036378;IPR036378;IPR036378;IPR000782;noIPR;noIPR;IPR000782;IPR000782;IPR000782;IPR000782;IPR036378;IPR036378;IPR036378;IPR036378
TRINITY_DN100127_c1_g2_i1	conserved hypothetical protein	2998	1	1.9E-43	63.98%	gi|241157750|ref|XP_002408147.1|conserved hypothetical protein [Ixodes scapularis]/gi|215494299|gb|EEC03940.1| conserved hypothetical protein [Ixodes scapularis]	Ixodes scapularis/Ixodes scapularis			noIPR;IPR001781;noIPR;noIPR;noIPR;noIPR;noIPR;noIPR;noIPR;noIPR;noIPR;noIPR;noIPR;noIPR;IPR001781;noIPR
TRINITY_DN100127_c1_g2_i2	conserved hypothetical protein	3312	1	2.1E-43	63.98%	gi|241157750|ref|XP_002408147.1|conserved hypothetical protein [Ixodes scapularis]/gi|215494299|gb|EEC03940.1| conserved hypothetical protein [Ixodes scapularis]	Ixodes scapularis/Ixodes scapularis			noIPR;IPR001781;noIPR;noIPR;noIPR;noIPR;noIPR;noIPR;noIPR;noIPR;noIPR;noIPR;noIPR;noIPR;IPR001781;noIPR
TRINITY_DN100128_c1_g1_i1	A disintegrin and metalloproteinase with thrombospondin motifs 6-like	1460	1	2.9E-191	74.02%	gi|1078803030|ref|XP_018494289.1|PREDICTED: A disintegrin and metalloproteinase with thrombospondin motifs 6-like [Galendromus occidentalis]	Galendromus occidentalis	EC:3.4.24	Acting on peptide bonds (peptidases)	noIPR;IPR041645;IPR024079;noIPR;noIPR;noIPR;noIPR;IPR001590;IPR034030;noIPR
TRINITY_DN100128_c1_g1_i3	uncharacterized protein LOC111249307 isoform X2	1430	1	4.4E-160	74.11%	gi|1253749550|ref|XP_022658747.1|uncharacterized protein LOC111249307 isoform X2 [Varroa destructor]	Varroa destructor	EC:3.4.24	Acting on peptide bonds (peptidases)	noIPR;IPR024079;noIPR;noIPR;noIPR;noIPR;IPR001590;IPR034030;noIPR
TRINITY_DN100129_c4_g1_i1	E1-E2 ATPase, putative	6954	1	0.0E0	97.44%	gi|241564310|ref|XP_002401874.1|E1-E2 ATPase, putative [Ixodes scapularis]/gi|215501920|gb|EEC11414.1| E1-E2 ATPase, putative, partial [Ixodes scapularis]	Ixodes scapularis/Ixodes scapularis	EC:3.6.1.3;EC:3.6.3.8;EC:3.6.1.15	Adenosinetriphosphatase;Calcium-transporting ATPase;Nucleoside-triphosphate phosphatase	noIPR;IPR006068;noIPR;noIPR;IPR023299;noIPR;IPR004014;IPR001757;noIPR;IPR023214;noIPR;IPR005782;IPR030332;noIPR;noIPR;IPR036412;IPR023298;IPR008250;IPR023299
TRINITY_DN100129_c4_g1_i2	E1-E2 ATPase, putative	7012	1	0.0E0	97.44%	gi|241564310|ref|XP_002401874.1|E1-E2 ATPase, putative [Ixodes scapularis]/gi|215501920|gb|EEC11414.1| E1-E2 ATPase, putative, partial [Ixodes scapularis]	Ixodes scapularis/Ixodes scapularis	EC:3.6.1.3;EC:3.6.3.8;EC:3.6.1.15	Adenosinetriphosphatase;Calcium-transporting ATPase;Nucleoside-triphosphate phosphatase	noIPR;noIPR;IPR006068;noIPR;IPR023299;IPR004014;noIPR;IPR001757;noIPR;IPR023214;noIPR;IPR005782;IPR030332;noIPR;noIPR;IPR036412;IPR023298;IPR008250;IPR023299
TRINITY_DN100130_c0_g1_i1	netrin-1-like	1753	1	1.2E-236	88.20%	gi|1316187635|ref|XP_023239606.1|netrin-1-like [Centruroides sculpturatus]	Centruroides sculpturatus			IPR002049;IPR038684;IPR008211;noIPR;noIPR;noIPR;noIPR;IPR008211;IPR002049;IPR002049;IPR002049;noIPR;noIPR;noIPR;noIPR;noIPR;noIPR
TRINITY_DN100130_c0_g1_i2	netrin-1-like	2789	1	3.7E-288	87.63%	gi|1316187635|ref|XP_023239606.1|netrin-1-like [Centruroides sculpturatus]	Centruroides sculpturatus			noIPR;noIPR;noIPR;IPR008211;IPR038684;IPR018933;IPR002049;noIPR;noIPR;IPR008211;IPR002049;IPR001134;IPR002049;IPR002049;noIPR;noIPR;noIPR;noIPR;noIPR;noIPR;IPR008993;noIPR
TRINITY_DN100130_c0_g1_i3	netrin-1-like	1994	1	1.8E-284	87.52%	gi|1316187635|ref|XP_023239606.1|netrin-1-like [Centruroides sculpturatus]	Centruroides sculpturatus			noIPR;IPR008211;noIPR;noIPR;IPR038684;IPR002049;IPR018933;noIPR;noIPR;IPR008211;IPR002049;IPR001134;IPR002049;IPR002049;noIPR;noIPR;noIPR;noIPR;noIPR;noIPR;noIPR;IPR008993
TRINITY_DN100131_c4_g1_i1	uncharacterized protein LOC107436447	3837	1	2.9E-57	51.28%	gi|1192754717|ref|XP_021000716.1|uncharacterized protein LOC107436447 [Parasteatoda tepidariorum]	Parasteatoda tepidariorum			noIPR;IPR001660;noIPR;noIPR;noIPR;noIPR;noIPR;noIPR;noIPR;noIPR;noIPR;noIPR;noIPR;noIPR;IPR001660;IPR013761
TRINITY_DN100133_c4_g1_i1	conserved hypothetical protein	3546	1	1.8E-101	91.79%	gi|241586205|ref|XP_002403717.1|conserved hypothetical protein [Ixodes scapularis]/gi|215502238|gb|EEC11732.1| conserved hypothetical protein [Ixodes scapularis]	Ixodes scapularis/Ixodes scapularis			IPR040373;IPR013087
TRINITY_DN100134_c0_g2_i1	hypothetical protein IscW_ISCW010651	4776	1	2.6E-63	72.94%	gi|241686577|ref|XP_002401483.1|hypothetical protein IscW_ISCW010651 [Ixodes scapularis]/gi|215504482|gb|EEC13976.1| hypothetical protein IscW_ISCW010651 [Ixodes scapularis]	Ixodes scapularis/Ixodes scapularis			noIPR;noIPR;noIPR;noIPR;noIPR;IPR008795
TRINITY_DN100134_c0_g2_i3	hypothetical protein IscW_ISCW010651	4775	1	2.6E-63	72.94%	gi|241686577|ref|XP_002401483.1|hypothetical protein IscW_ISCW010651 [Ixodes scapularis]/gi|215504482|gb|EEC13976.1| hypothetical protein IscW_ISCW010651 [Ixodes scapularis]	Ixodes scapularis/Ixodes scapularis			noIPR;noIPR;noIPR;noIPR;noIPR;IPR008795
TRINITY_DN100134_c0_g2_i5	tissue factor pathway inhibitor-like	969	1	8.0E-12	65.82%	gi|524872964|ref|XP_005093237.1|PREDICTED: tissue factor pathway inhibitor-like [Aplysia californica]/gi|524872966|ref|XP_005093238.1| PREDICTED: tissue factor pathway inhibitor-like [Aplysia californica]/gi|871216725|ref|XP_012935125.1| PREDICTED: tissue factor pathway inhibitor-like [Aplysia californica]/gi|871216728|ref|XP_012935126.1| PREDICTED: tissue factor pathway inhibitor-like [Aplysia c…	Aplysia californica/Aplysia californica/Aplysia californica/Aplysia californica/Aplysia californica			IPR002223;IPR002223;IPR036880;noIPR;IPR002223;IPR002223;IPR036880
TRINITY_DN100135_c5_g1_i1	Four-jointed box protein, putative	6213	1	3.6E-174	84.37%	gi|241998542|ref|XP_002433914.1|Four-jointed box protein, putative [Ixodes scapularis]/gi|215495673|gb|EEC05314.1| Four-jointed box protein, putative [Ixodes scapularis]	Ixodes scapularis/Ixodes scapularis			IPR024868;noIPR;noIPR;IPR024868
TRINITY_DN100135_c5_g1_i2	Four-jointed box protein, putative	6213	1	3.6E-174	84.37%	gi|241998542|ref|XP_002433914.1|Four-jointed box protein, putative [Ixodes scapularis]/gi|215495673|gb|EEC05314.1| Four-jointed box protein, putative [Ixodes scapularis]	Ixodes scapularis/Ixodes scapularis			IPR024868;noIPR;noIPR;IPR024868
TRINITY_DN100136_c1_g1_i1	ras-related protein Rab-27A-like	1922	1	8.2E-77	85.79%	gi|1048056622|ref|XP_017482469.1|PREDICTED: ras-related protein Rab-27A-like [Rhagoletis zephyria]	Rhagoletis zephyria	EC:3.6.1.15	Nucleoside-triphosphate phosphatase	noIPR;IPR001806;IPR005225;noIPR;noIPR;noIPR;noIPR;noIPR;IPR027417
TRINITY_DN100136_c1_g1_i11	ras-related protein Rab-27A-like	1519	1	6.5E-77	85.79%	gi|1048056622|ref|XP_017482469.1|PREDICTED: ras-related protein Rab-27A-like [Rhagoletis zephyria]	Rhagoletis zephyria	EC:3.6.1.15	Nucleoside-triphosphate phosphatase	noIPR;IPR001806;IPR005225;noIPR;noIPR;noIPR;noIPR;noIPR;IPR027417
TRINITY_DN100136_c1_g1_i14	ras-related protein Rab-27A-like	1818	1	7.8E-77	85.79%	gi|1048056622|ref|XP_017482469.1|PREDICTED: ras-related protein Rab-27A-like [Rhagoletis zephyria]	Rhagoletis zephyria	EC:3.6.1.15	Nucleoside-triphosphate phosphatase	noIPR;IPR001806;IPR005225;noIPR;noIPR;noIPR;noIPR;noIPR;IPR027417
TRINITY_DN100136_c1_g1_i16	ras-related protein Rab-27A-like	1819	1	7.8E-77	85.79%	gi|1048056622|ref|XP_017482469.1|PREDICTED: ras-related protein Rab-27A-like [Rhagoletis zephyria]	Rhagoletis zephyria	EC:3.6.1.15	Nucleoside-triphosphate phosphatase	noIPR;IPR001806;IPR005225;noIPR;noIPR;noIPR;noIPR;noIPR;IPR027417
TRINITY_DN100136_c1_g1_i17	ras-related protein Rab-27A-like	1355	1	5.8E-77	85.79%	gi|1048056622|ref|XP_017482469.1|PREDICTED: ras-related protein Rab-27A-like [Rhagoletis zephyria]	Rhagoletis zephyria	EC:3.6.1.15	Nucleoside-triphosphate phosphatase	noIPR;IPR001806;IPR005225;noIPR;noIPR;noIPR;noIPR;noIPR;IPR027417
TRINITY_DN100136_c1_g1_i3	ras-related protein Rab-27A-like	1921	1	8.2E-77	85.79%	gi|1048056622|ref|XP_017482469.1|PREDICTED: ras-related protein Rab-27A-like [Rhagoletis zephyria]	Rhagoletis zephyria	EC:3.6.1.15	Nucleoside-triphosphate phosphatase	noIPR;IPR001806;IPR005225;noIPR;noIPR;noIPR;noIPR;noIPR;IPR027417
TRINITY_DN100136_c1_g1_i9	ras-related protein Rab-27A-like	1355	1	5.8E-77	85.79%	gi|1048056622|ref|XP_017482469.1|PREDICTED: ras-related protein Rab-27A-like [Rhagoletis zephyria]	Rhagoletis zephyria	EC:3.6.1.15	Nucleoside-triphosphate phosphatase	noIPR;IPR001806;IPR005225;noIPR;noIPR;noIPR;noIPR;noIPR;IPR027417
TRINITY_DN100137_c1_g1_i1	conserved hypothetical protein	857	1	1.1E-65	88.44%	gi|240995606|ref|XP_002404628.1|conserved hypothetical protein [Ixodes scapularis]/gi|215491630|gb|EEC01271.1| conserved hypothetical protein [Ixodes scapularis]	Ixodes scapularis/Ixodes scapularis			IPR029012;IPR009360;noIPR;noIPR;IPR009360;IPR037200
TRINITY_DN100137_c1_g1_i2	conserved hypothetical protein	646	1	5.2E-92	90.37%	gi|240995606|ref|XP_002404628.1|conserved hypothetical protein [Ixodes scapularis]/gi|215491630|gb|EEC01271.1| conserved hypothetical protein [Ixodes scapularis]	Ixodes scapularis/Ixodes scapularis			IPR009360;IPR029012;noIPR;noIPR;IPR009360;IPR037200
TRINITY_DN100137_c1_g1_i6	conserved hypothetical protein	796	1	1.6E-63	89.02%	gi|240995606|ref|XP_002404628.1|conserved hypothetical protein [Ixodes scapularis]/gi|215491630|gb|EEC01271.1| conserved hypothetical protein [Ixodes scapularis]	Ixodes scapularis/Ixodes scapularis			IPR029012;IPR009360;IPR009360;IPR037200
TRINITY_DN100137_c1_g1_i7	conserved hypothetical protein	931	1	5.4E-90	90.91%	gi|240995606|ref|XP_002404628.1|conserved hypothetical protein [Ixodes scapularis]/gi|215491630|gb|EEC01271.1| conserved hypothetical protein [Ixodes scapularis]	Ixodes scapularis/Ixodes scapularis			IPR009360;IPR029012;IPR009360;IPR037200
TRINITY_DN100137_c2_g1_i1	organic anion transporter, putative	5340	1	0.0E0	69.26%	gi|241739766|ref|XP_002414101.1|organic anion transporter, putative [Ixodes scapularis]/gi|215507955|gb|EEC17409.1| organic anion transporter, putative, partial [Ixodes scapularis]	Ixodes scapularis/Ixodes scapularis			IPR004156;IPR002350;IPR004156;noIPR;noIPR;noIPR;noIPR;noIPR;IPR004156;IPR002350;noIPR;IPR020846;IPR036058;IPR036259
TRINITY_DN100138_c4_g1_i1	tetratricopeptide repeat protein 21B-like	661	1	1.5E-33	87.13%	gi|1238845920|ref|XP_022241283.1|tetratricopeptide repeat protein 21B-like [Limulus polyphemus]	Limulus polyphemus			noIPR;IPR040364
TRINITY_DN100138_c4_g1_i2	conserved hypothetical protein	2194	1	1.2E-87	71.52%	gi|241613931|ref|XP_002407469.1|conserved hypothetical protein [Ixodes scapularis]/gi|215502818|gb|EEC12312.1| conserved hypothetical protein [Ixodes scapularis]	Ixodes scapularis/Ixodes scapularis			IPR013579;noIPR;noIPR
TRINITY_DN100138_c4_g1_i3	tetratricopeptide repeat protein 21B-like	2255	1	1.3E-113	87.90%	gi|1238845920|ref|XP_022241283.1|tetratricopeptide repeat protein 21B-like [Limulus polyphemus]	Limulus polyphemus			IPR011990;noIPR;IPR040364;IPR013026;IPR019734;IPR019734;IPR011990
TRINITY_DN100138_c4_g1_i4	conserved hypothetical protein	2347	1	1.3E-87	71.52%	gi|241613931|ref|XP_002407469.1|conserved hypothetical protein [Ixodes scapularis]/gi|215502818|gb|EEC12312.1| conserved hypothetical protein [Ixodes scapularis]	Ixodes scapularis/Ixodes scapularis			IPR013579;noIPR;noIPR
TRINITY_DN100138_c4_g3_i1	tetratricopeptide repeat protein 21B-like	1829	1	2.8E-127	63.13%	gi|1316164500|ref|XP_023227553.1|tetratricopeptide repeat protein 21B-like [Centruroides sculpturatus]	Centruroides sculpturatus			IPR011990;IPR013105;IPR011990;IPR011990;noIPR;IPR040364;IPR019734;IPR019734;IPR013026;IPR019734;IPR013026;IPR011990;IPR011990
TRINITY_DN100138_c4_g3_i2	tetratricopeptide repeat protein 21B-like	2147	1	9.1E-210	75.73%	gi|1316164500|ref|XP_023227553.1|tetratricopeptide repeat protein 21B-like [Centruroides sculpturatus]	Centruroides sculpturatus			IPR011990;IPR011717;noIPR;IPR011990;IPR011990;IPR013105;noIPR;IPR040364;IPR019734;IPR019734;IPR013026;IPR019734;IPR019734;IPR019734;IPR019734;IPR019734;IPR013026;IPR019734;IPR011990;IPR011990;IPR011990
TRINITY_DN100138_c4_g3_i3	tetratricopeptide repeat protein 21B-like	1689	1	4.3E-106	79.69%	gi|1316164500|ref|XP_023227553.1|tetratricopeptide repeat protein 21B-like [Centruroides sculpturatus]	Centruroides sculpturatus			IPR011990;IPR013105;IPR011990;IPR011990;noIPR;IPR040364;IPR019734;IPR013026;IPR019734;IPR019734;IPR013026;IPR011990;IPR011990
TRINITY_DN100138_c4_g3_i4	tetratricopeptide repeat protein 21B-like	1989	1	3.5E-163	79.46%	gi|1316164500|ref|XP_023227553.1|tetratricopeptide repeat protein 21B-like [Centruroides sculpturatus]	Centruroides sculpturatus			IPR011990;noIPR;noIPR;IPR011990;IPR013105;IPR040364;IPR019734;IPR019734;IPR019734;IPR013026;IPR019734;IPR019734;IPR019734;IPR013026;IPR011990;IPR011990
TRINITY_DN100139_c6_g3_i1	vacuolar protein-sorting protein, putative	4139	1	3.6E-202	56.77%	gi|241690315|ref|XP_002411760.1|vacuolar protein-sorting protein, putative [Ixodes scapularis]/gi|215504595|gb|EEC14089.1| vacuolar protein-sorting protein, putative [Ixodes scapularis]	Ixodes scapularis/Ixodes scapularis			IPR012501;IPR019515;noIPR;IPR039745
TRINITY_DN100140_c0_g2_i1	type I inositol-1,4,5-trisphosphate 5-phosphatase, putative	807	1	1.2E-82	87.50%	gi|242000028|ref|XP_002434657.1|type I inositol-1,4,5-trisphosphate 5-phosphatase, putative [Ixodes scapularis]/gi|215497987|gb|EEC07481.1| type I inositol-1,4,5-trisphosphate 5-phosphatase, putative, partial [Ixodes scapularis]	Ixodes scapularis/Ixodes scapularis	EC:3.1.3.56	Inositol-polyphosphate 5-phosphatase	IPR036691;noIPR;IPR039737;IPR036691
TRINITY_DN100140_c0_g2_i2	type I inositol 1,4,5-trisphosphate 5-phosphatase-like	3003	1	9.9E-162	83.12%	gi|1238847734|ref|XP_013774868.2|type I inositol 1,4,5-trisphosphate 5-phosphatase-like [Limulus polyphemus]	Limulus polyphemus	EC:3.1.3.56	Inositol-polyphosphate 5-phosphatase	IPR036691;IPR005135;noIPR;IPR039737;IPR036691
TRINITY_DN100140_c0_g2_i4	type I inositol 1,4,5-trisphosphate 5-phosphatase-like	2921	1	5.9E-135	66.05%	gi|1238847734|ref|XP_013774868.2|type I inositol 1,4,5-trisphosphate 5-phosphatase-like [Limulus polyphemus]	Limulus polyphemus	EC:3.1.3.56	Inositol-polyphosphate 5-phosphatase	IPR036691;IPR005135;noIPR;IPR039737;IPR036691
TRINITY_DN100140_c0_g2_i5	type I inositol 1,4,5-trisphosphate 5-phosphatase-like	2738	1	4.5E-169	77.43%	gi|1238847734|ref|XP_013774868.2|type I inositol 1,4,5-trisphosphate 5-phosphatase-like [Limulus polyphemus]	Limulus polyphemus	EC:3.1.3.56	Inositol-polyphosphate 5-phosphatase	IPR036691;IPR005135;IPR039737;noIPR;IPR036691
TRINITY_DN100144_c2_g1_i1	ionotropic glutamate receptor, putative	1055	1	2.0E-61	91.43%	gi|241704140|ref|XP_002413220.1|ionotropic glutamate receptor, putative [Ixodes scapularis]/gi|215507034|gb|EEC16528.1| ionotropic glutamate receptor, putative, partial [Ixodes scapularis]	Ixodes scapularis/Ixodes scapularis			noIPR;noIPR;noIPR;noIPR
TRINITY_DN100144_c2_g1_i2	ionotropic glutamate receptor, putative	663	1	1.3E-61	91.43%	gi|241704140|ref|XP_002413220.1|ionotropic glutamate receptor, putative [Ixodes scapularis]/gi|215507034|gb|EEC16528.1| ionotropic glutamate receptor, putative, partial [Ixodes scapularis]	Ixodes scapularis/Ixodes scapularis			noIPR;noIPR;noIPR;noIPR;noIPR
TRINITY_DN100144_c3_g1_i1	excitatory amino acid transporter, putative	1916	1	6.5E-183	88.62%	gi|241704138|ref|XP_002413219.1|excitatory amino acid transporter, putative [Ixodes scapularis]/gi|215507033|gb|EEC16527.1| excitatory amino acid transporter, putative, partial [Ixodes scapularis]	Ixodes scapularis/Ixodes scapularis			IPR001828;noIPR;noIPR;noIPR;noIPR;noIPR;IPR028082
TRINITY_DN100144_c3_g1_i2	excitatory amino acid transporter, putative	1916	1	6.5E-183	88.62%	gi|241704138|ref|XP_002413219.1|excitatory amino acid transporter, putative [Ixodes scapularis]/gi|215507033|gb|EEC16527.1| excitatory amino acid transporter, putative, partial [Ixodes scapularis]	Ixodes scapularis/Ixodes scapularis			IPR001828;noIPR;noIPR;noIPR;noIPR;noIPR;IPR028082
TRINITY_DN100144_c3_g2_i1	excitatory amino acid transporter, putative	598	1	5.9E-82	92.31%	gi|241704138|ref|XP_002413219.1|excitatory amino acid transporter, putative [Ixodes scapularis]/gi|215507033|gb|EEC16527.1| excitatory amino acid transporter, putative, partial [Ixodes scapularis]	Ixodes scapularis/Ixodes scapularis			noIPR;noIPR;IPR001320;IPR019594;noIPR;noIPR;noIPR
TRINITY_DN100144_c3_g2_i2	excitatory amino acid transporter, putative	899	1	1.6E-147	91.64%	gi|241704138|ref|XP_002413219.1|excitatory amino acid transporter, putative [Ixodes scapularis]/gi|215507033|gb|EEC16527.1| excitatory amino acid transporter, putative, partial [Ixodes scapularis]	Ixodes scapularis/Ixodes scapularis			IPR001508;noIPR;noIPR;IPR001320;IPR019594;noIPR;noIPR;noIPR;noIPR
TRINITY_DN100145_c1_g1_i1	kinesin heavy chain, putative	4146	1	2.8E-271	78.04%	gi|242001262|ref|XP_002435274.1|kinesin heavy chain, putative [Ixodes scapularis]/gi|215498604|gb|EEC08098.1| kinesin heavy chain, putative [Ixodes scapularis]	Ixodes scapularis/Ixodes scapularis	EC:3.6.1.15	Nucleoside-triphosphate phosphatase	IPR001752;IPR036961;IPR001752;noIPR;noIPR;noIPR;noIPR;noIPR;IPR027640;IPR001752;noIPR;IPR027417
TRINITY_DN100145_c1_g1_i2	kinesin heavy chain, putative	4113	1	2.5E-272	79.47%	gi|242001262|ref|XP_002435274.1|kinesin heavy chain, putative [Ixodes scapularis]/gi|215498604|gb|EEC08098.1| kinesin heavy chain, putative [Ixodes scapularis]	Ixodes scapularis/Ixodes scapularis	EC:3.6.1.15	Nucleoside-triphosphate phosphatase	IPR001752;IPR001752;IPR036961;noIPR;noIPR;noIPR;noIPR;IPR027640;noIPR;IPR001752;noIPR;IPR027417
TRINITY_DN100146_c1_g1_i4	PREDICTED: uncharacterized protein LOC105148581	2728	1	3.7E-14	53.91%	gi|746832511|ref|XP_011058687.1|PREDICTED: uncharacterized protein LOC105148581 [Acromyrmex echinatior]	Acromyrmex echinatior
TRINITY_DN100146_c1_g1_i5	PREDICTED: uncharacterized protein LOC105148581	2760	1	3.7E-14	53.91%	gi|746832511|ref|XP_011058687.1|PREDICTED: uncharacterized protein LOC105148581 [Acromyrmex echinatior]	Acromyrmex echinatior
TRINITY_DN100146_c1_g1_i7	PREDICTED: uncharacterized protein LOC105148581	2733	1	3.7E-14	53.91%	gi|746832511|ref|XP_011058687.1|PREDICTED: uncharacterized protein LOC105148581 [Acromyrmex echinatior]	Acromyrmex echinatior
TRINITY_DN100151_c3_g1_i1	PREDICTED: uncharacterized protein LOC100908957	2226	1	1.9E-125	59.37%	gi|1078799585|ref|XP_018497213.1|PREDICTED: uncharacterized protein LOC100908957 [Galendromus occidentalis]	Galendromus occidentalis			IPR008279;noIPR;noIPR;IPR002192;noIPR;noIPR;IPR036637;noIPR
TRINITY_DN100151_c3_g1_i4	PREDICTED: uncharacterized protein LOC100908957	2149	1	1.5E-114	60.03%	gi|1078799585|ref|XP_018497213.1|PREDICTED: uncharacterized protein LOC100908957 [Galendromus occidentalis]	Galendromus occidentalis			IPR008279;noIPR;noIPR;IPR002192;noIPR;noIPR;noIPR;IPR036637
TRINITY_DN100151_c3_g1_i5	PREDICTED: uncharacterized protein LOC100908957	2378	1	5.1E-145	61.26%	gi|1078799585|ref|XP_018497213.1|PREDICTED: uncharacterized protein LOC100908957 [Galendromus occidentalis]	Galendromus occidentalis			noIPR;noIPR;IPR002192;IPR008279;noIPR;noIPR;IPR036637;noIPR
TRINITY_DN100153_c1_g1_i1	histone deacetylase 4, 5, putative	5014	1	0.0E0	81.22%	gi|241838130|ref|XP_002415202.1|histone deacetylase 4, 5, putative [Ixodes scapularis]/gi|215509414|gb|EEC18867.1| histone deacetylase 4, 5, putative, partial [Ixodes scapularis]	Ixodes scapularis/Ixodes scapularis	EC:3.5.1.98	Histone deacetylase	IPR000286;IPR037138;IPR017320;IPR023801;noIPR;noIPR;noIPR;noIPR;noIPR;noIPR;noIPR;noIPR;noIPR;noIPR;IPR000286;IPR033660;noIPR;IPR023696
TRINITY_DN100153_c1_g1_i3	histone deacetylase 4, 5, putative	3284	1	0.0E0	79.34%	gi|241838130|ref|XP_002415202.1|histone deacetylase 4, 5, putative [Ixodes scapularis]/gi|215509414|gb|EEC18867.1| histone deacetylase 4, 5, putative, partial [Ixodes scapularis]	Ixodes scapularis/Ixodes scapularis	EC:3.5.1.98	Histone deacetylase	IPR000286;IPR037138;IPR023801;IPR017320;noIPR;noIPR;noIPR;noIPR;noIPR;noIPR;noIPR;noIPR;noIPR;IPR033660;IPR000286;IPR023696
TRINITY_DN100153_c1_g1_i4	histone deacetylase 4, 5, putative	5833	1	0.0E0	81.22%	gi|241838130|ref|XP_002415202.1|histone deacetylase 4, 5, putative [Ixodes scapularis]/gi|215509414|gb|EEC18867.1| histone deacetylase 4, 5, putative, partial [Ixodes scapularis]	Ixodes scapularis/Ixodes scapularis	EC:3.5.1.98	Histone deacetylase	IPR000286;IPR037138;IPR023801;IPR017320;noIPR;noIPR;noIPR;noIPR;noIPR;noIPR;noIPR;noIPR;noIPR;noIPR;noIPR;IPR033660;IPR000286;noIPR;IPR023696
TRINITY_DN100153_c1_g1_i6	histone deacetylase 4, 5, putative	4401	1	0.0E0	81.11%	gi|241838130|ref|XP_002415202.1|histone deacetylase 4, 5, putative [Ixodes scapularis]/gi|215509414|gb|EEC18867.1| histone deacetylase 4, 5, putative, partial [Ixodes scapularis]	Ixodes scapularis/Ixodes scapularis	EC:3.5.1.98	Histone deacetylase	IPR000286;IPR037138;IPR017320;IPR023801;noIPR;noIPR;noIPR;noIPR;noIPR;noIPR;noIPR;noIPR;noIPR;noIPR;noIPR;IPR033660;IPR000286;noIPR;IPR023696
TRINITY_DN100153_c1_g1_i7	histone deacetylase 4, 5, putative	5002	1	0.0E0	81.22%	gi|241838130|ref|XP_002415202.1|histone deacetylase 4, 5, putative [Ixodes scapularis]/gi|215509414|gb|EEC18867.1| histone deacetylase 4, 5, putative, partial [Ixodes scapularis]	Ixodes scapularis/Ixodes scapularis	EC:3.5.1.98	Histone deacetylase	IPR000286;IPR037138;IPR023801;IPR017320;noIPR;noIPR;noIPR;noIPR;noIPR;noIPR;noIPR;noIPR;noIPR;noIPR;noIPR;IPR033660;IPR000286;noIPR;IPR023696
TRINITY_DN100154_c1_g1_i5	ataxia telangiectasia mutated, putative	812	1	5.3E-25	81.05%	gi|240980642|ref|XP_002403513.1|ataxia telangiectasia mutated, putative [Ixodes scapularis]/gi|215491361|gb|EEC01002.1| ataxia telangiectasia mutated, putative, partial [Ixodes scapularis]	Ixodes scapularis/Ixodes scapularis	EC:2.7.11	Transferring phosphorus-containing groups	IPR003151;noIPR;IPR015519
TRINITY_DN100155_c0_g1_i1	PREDICTED: uncharacterized protein LOC107045124	505	1	8.1E-8	52.59%	gi|970912923|ref|XP_015122746.1|PREDICTED: uncharacterized protein LOC107045124 [Diachasma alloeum]	Diachasma alloeum
TRINITY_DN100155_c0_g2_i2	RE1-silencing transcription factor B-like	536	1	1.3E-16	61.17%	gi|1080053185|ref|XP_018568174.1|RE1-silencing transcription factor B-like [Anoplophora glabripennis]	Anoplophora glabripennis			IPR006612;IPR038441;IPR006612;noIPR
TRINITY_DN100157_c0_g1_i2	zinc finger protein, putative	6924	1	1.1E-91	57.01%	gi|241628079|ref|XP_002408131.1|zinc finger protein, putative [Ixodes scapularis]/gi|215501129|gb|EEC10623.1| zinc finger protein, putative [Ixodes scapularis]	Ixodes scapularis/Ixodes scapularis			noIPR;IPR013087;noIPR;noIPR;noIPR;noIPR;noIPR;noIPR;noIPR;noIPR;noIPR;noIPR;noIPR;noIPR;noIPR;noIPR;noIPR;noIPR;noIPR;noIPR;IPR013087;IPR013087;IPR013087;IPR013087;IPR013087;IPR013087;IPR013087;IPR013087;IPR013087;IPR013087;IPR013087;IPR013087;IPR013087;IPR036236;IPR036236;IPR036236;IPR036236;IPR036236;IPR036236;IPR036236;IPR036236;IPR036236
TRINITY_DN100157_c0_g1_i3	zinc finger protein, putative	7462	1	1.2E-91	57.01%	gi|241628079|ref|XP_002408131.1|zinc finger protein, putative [Ixodes scapularis]/gi|215501129|gb|EEC10623.1| zinc finger protein, putative [Ixodes scapularis]	Ixodes scapularis/Ixodes scapularis			noIPR;IPR013087;noIPR;noIPR;noIPR;noIPR;noIPR;noIPR;noIPR;noIPR;noIPR;noIPR;noIPR;noIPR;noIPR;noIPR;noIPR;noIPR;noIPR;noIPR;IPR013087;IPR013087;IPR013087;IPR013087;IPR013087;IPR013087;IPR013087;IPR013087;IPR013087;IPR013087;IPR013087;IPR013087;IPR013087;IPR036236;IPR036236;IPR036236;IPR036236;IPR036236;IPR036236;IPR036236;IPR036236;IPR036236
TRINITY_DN100157_c0_g1_i4	zinc finger protein, putative	7454	1	1.2E-91	57.01%	gi|241628079|ref|XP_002408131.1|zinc finger protein, putative [Ixodes scapularis]/gi|215501129|gb|EEC10623.1| zinc finger protein, putative [Ixodes scapularis]	Ixodes scapularis/Ixodes scapularis			noIPR;IPR013087;noIPR;noIPR;noIPR;noIPR;noIPR;noIPR;noIPR;noIPR;noIPR;noIPR;noIPR;noIPR;noIPR;noIPR;noIPR;noIPR;noIPR;noIPR;IPR013087;IPR013087;IPR013087;IPR013087;IPR013087;IPR013087;IPR013087;IPR013087;IPR013087;IPR013087;IPR013087;IPR013087;IPR013087;IPR036236;IPR036236;IPR036236;IPR036236;IPR036236;IPR036236;IPR036236;IPR036236;IPR036236
TRINITY_DN100160_c0_g1_i1	hemelipoglycoprotein precursor 2	887	1	4.0E-119	82.71%	gi|194241600|gb|ACF35055.1|hemelipoglycoprotein precursor 2, partial [Dermacentor variabilis]	Dermacentor variabilis			IPR001747;IPR015816;IPR011030;IPR015819
TRINITY_DN100160_c0_g1_i3	hemelipoglycoprotein precursor 2	746	1	5.5E-45	83.59%	gi|194241600|gb|ACF35055.1|hemelipoglycoprotein precursor 2, partial [Dermacentor variabilis]	Dermacentor variabilis			IPR011030;IPR001747;IPR011030
TRINITY_DN100160_c0_g1_i4	hemelipoglycoprotein precursor 2	575	1	7.4E-74	82.72%	gi|194241600|gb|ACF35055.1|hemelipoglycoprotein precursor 2, partial [Dermacentor variabilis]	Dermacentor variabilis			IPR015816;IPR001747;IPR015819
TRINITY_DN100160_c0_g1_i5	hemelipoglycoprotein precursor 2	1116	1	5.0E-151	81.94%	gi|194241600|gb|ACF35055.1|hemelipoglycoprotein precursor 2, partial [Dermacentor variabilis]	Dermacentor variabilis			IPR001747;IPR011030;IPR015816;noIPR;IPR001747;IPR015819
TRINITY_DN100160_c1_g1_i1	hemelipoglycoprotein precursor 2	1245	1	1.0E-184	87.92%	gi|194241600|gb|ACF35055.1|hemelipoglycoprotein precursor 2, partial [Dermacentor variabilis]	Dermacentor variabilis			IPR015255;IPR001747;IPR011030;noIPR;noIPR;IPR001747;IPR015819;IPR011030
TRINITY_DN100160_c1_g1_i2	hemelipoglycoprotein precursor 2	1182	1	3.6E-83	82.33%	gi|194241600|gb|ACF35055.1|hemelipoglycoprotein precursor 2, partial [Dermacentor variabilis]	Dermacentor variabilis			IPR015255;noIPR;noIPR;IPR015819
TRINITY_DN100160_c1_g1_i3	hemelipoglycoprotein precursor 2	664	1	1.8E-92	87.33%	gi|194241600|gb|ACF35055.1|hemelipoglycoprotein precursor 2, partial [Dermacentor variabilis]	Dermacentor variabilis			IPR011030;IPR001747;noIPR;IPR011030
TRINITY_DN100160_c1_g1_i4	hemelipoglycoprotein precursor 2	533	1	3.7E-80	91.53%	gi|194241600|gb|ACF35055.1|hemelipoglycoprotein precursor 2, partial [Dermacentor variabilis]	Dermacentor variabilis			IPR011030;IPR015255;noIPR;noIPR;IPR015819;IPR011030
TRINITY_DN100160_c2_g1_i2	hemelipoglycoprotein precursor 2	1815	1	4.7E-300	88.26%	gi|194241600|gb|ACF35055.1|hemelipoglycoprotein precursor 2, partial [Dermacentor variabilis]	Dermacentor variabilis			IPR001846;noIPR;IPR024134;IPR001846
TRINITY_DN100160_c2_g1_i3	hemelipoglycoprotein precursor 2	507	1	3.8E-74	89.88%	gi|194241600|gb|ACF35055.1|hemelipoglycoprotein precursor 2, partial [Dermacentor variabilis]	Dermacentor variabilis			IPR001846;IPR041090;IPR001846
TRINITY_DN100160_c2_g1_i4	hemelipoglycoprotein precursor 2	1815	1	3.6E-300	88.26%	gi|194241600|gb|ACF35055.1|hemelipoglycoprotein precursor 2, partial [Dermacentor variabilis]	Dermacentor variabilis			IPR001846;noIPR;IPR024134;IPR001846
TRINITY_DN100162_c3_g1_i1	cofactor required for Sp1 transcriptional activation, putative	3558	1	2.3E-165	95.50%	gi|241999332|ref|XP_002434309.1|cofactor required for Sp1 transcriptional activation, putative [Ixodes scapularis]/gi|215496068|gb|EEC05709.1| cofactor required for Sp1 transcriptional activation, putative [Ixodes scapularis]	Ixodes scapularis/Ixodes scapularis			IPR021627;IPR021627
TRINITY_DN100162_c3_g1_i2	cofactor required for Sp1 transcriptional activation, putative	3997	1	2.6E-165	95.50%	gi|241999332|ref|XP_002434309.1|cofactor required for Sp1 transcriptional activation, putative [Ixodes scapularis]/gi|215496068|gb|EEC05709.1| cofactor required for Sp1 transcriptional activation, putative [Ixodes scapularis]	Ixodes scapularis/Ixodes scapularis			IPR021627;IPR021627
TRINITY_DN100162_c3_g1_i4	cofactor required for Sp1 transcriptional activation, putative	3513	1	2.3E-165	95.50%	gi|241999332|ref|XP_002434309.1|cofactor required for Sp1 transcriptional activation, putative [Ixodes scapularis]/gi|215496068|gb|EEC05709.1| cofactor required for Sp1 transcriptional activation, putative [Ixodes scapularis]	Ixodes scapularis/Ixodes scapularis			IPR021627;IPR021627
TRINITY_DN100163_c4_g1_i1	tRNA (guanine-N(7)-)-methyltransferase, putative	2253	1	9.3E-88	87.14%	gi|241997672|ref|XP_002433485.1|tRNA (guanine-N(7)-)-methyltransferase, putative [Ixodes scapularis]/gi|215490908|gb|EEC00549.1| tRNA (guanine-N(7)-)-methyltransferase, putative, partial [Ixodes scapularis]	Ixodes scapularis/Ixodes scapularis	EC:2.1.1.33	tRNA (guanine(46)-N(7))-methyltransferase	noIPR;IPR003358;IPR003358;IPR025763;IPR003358;IPR025763;IPR003358;IPR029063
TRINITY_DN100163_c4_g1_i2	tRNA (guanine-N(7)-)-methyltransferase, putative	1844	1	2.6E-104	87.08%	gi|241997672|ref|XP_002433485.1|tRNA (guanine-N(7)-)-methyltransferase, putative [Ixodes scapularis]/gi|215490908|gb|EEC00549.1| tRNA (guanine-N(7)-)-methyltransferase, putative, partial [Ixodes scapularis]	Ixodes scapularis/Ixodes scapularis	EC:2.1.1.33	tRNA (guanine(46)-N(7))-methyltransferase	IPR003358;noIPR;IPR003358;IPR003358;IPR025763;IPR003358;IPR025763;IPR029063
TRINITY_DN100163_c4_g1_i3	TBC1 domain family member 2B-like	5135	1	1.3E-124	80.71%	gi|926637246|ref|XP_013784589.1|TBC1 domain family member 2B-like [Limulus polyphemus]/gi|1238879105|ref|XP_022252764.1| TBC1 domain family member 2B-like [Limulus polyphemus]/gi|1238879108|ref|XP_022252765.1| TBC1 domain family member 2B-like [Limulus polyphemus]/gi|1238879110|ref|XP_022252766.1| TBC1 domain family member 2B-like [Limulus polyphemus]	Limulus polyphemus/Limulus polyphemus/Limulus polyphemus/Limulus polyphemus			IPR000195;noIPR;noIPR;noIPR;noIPR;IPR000195;IPR035969;IPR035969
TRINITY_DN100163_c4_g1_i4	TBC1 domain family member 2B-like	5278	1	1.3E-124	80.71%	gi|926637246|ref|XP_013784589.1|TBC1 domain family member 2B-like [Limulus polyphemus]/gi|1238879105|ref|XP_022252764.1| TBC1 domain family member 2B-like [Limulus polyphemus]/gi|1238879108|ref|XP_022252765.1| TBC1 domain family member 2B-like [Limulus polyphemus]/gi|1238879110|ref|XP_022252766.1| TBC1 domain family member 2B-like [Limulus polyphemus]	Limulus polyphemus/Limulus polyphemus/Limulus polyphemus/Limulus polyphemus			IPR000195;noIPR;noIPR;noIPR;noIPR;IPR000195;IPR035969;IPR035969
TRINITY_DN100164_c1_g1_i1	secreted protein, putative	1779	1	9.1E-38	54.42%	gi|241802504|ref|XP_002414536.1|secreted protein, putative [Ixodes scapularis]/gi|215508747|gb|EEC18201.1| secreted protein, putative [Ixodes scapularis]	Ixodes scapularis/Ixodes scapularis			noIPR;noIPR
TRINITY_DN100164_c1_g1_i4	secreted protein, putative	1915	1	9.8E-38	54.42%	gi|241802504|ref|XP_002414536.1|secreted protein, putative [Ixodes scapularis]/gi|215508747|gb|EEC18201.1| secreted protein, putative [Ixodes scapularis]	Ixodes scapularis/Ixodes scapularis			noIPR;noIPR
TRINITY_DN100164_c1_g1_i6	secreted protein, putative	1970	1	1.0E-37	54.42%	gi|241802504|ref|XP_002414536.1|secreted protein, putative [Ixodes scapularis]/gi|215508747|gb|EEC18201.1| secreted protein, putative [Ixodes scapularis]	Ixodes scapularis/Ixodes scapularis			noIPR;noIPR
TRINITY_DN100164_c1_g1_i7	secreted protein, putative	2011	1	1.0E-37	54.42%	gi|241802504|ref|XP_002414536.1|secreted protein, putative [Ixodes scapularis]/gi|215508747|gb|EEC18201.1| secreted protein, putative [Ixodes scapularis]	Ixodes scapularis/Ixodes scapularis			noIPR;noIPR
TRINITY_DN100164_c1_g1_i8	secreted protein, putative	1956	1	1.0E-37	54.42%	gi|241802504|ref|XP_002414536.1|secreted protein, putative [Ixodes scapularis]/gi|215508747|gb|EEC18201.1| secreted protein, putative [Ixodes scapularis]	Ixodes scapularis/Ixodes scapularis			noIPR;noIPR
TRINITY_DN100165_c2_g1_i1	ornithine decarboxylase, putative	2049	1	1.3E-184	89.29%	gi|241699676|ref|XP_002413144.1|ornithine decarboxylase, putative [Ixodes scapularis]/gi|215506958|gb|EEC16452.1| ornithine decarboxylase, putative [Ixodes scapularis]	Ixodes scapularis/Ixodes scapularis			IPR000183;IPR002433;IPR022643;IPR022644;IPR009006;IPR029066;IPR002433;noIPR;IPR009006;IPR029066
TRINITY_DN100165_c2_g1_i2	ornithine decarboxylase, putative	1826	1	2.3E-177	89.46%	gi|241699676|ref|XP_002413144.1|ornithine decarboxylase, putative [Ixodes scapularis]/gi|215506958|gb|EEC16452.1| ornithine decarboxylase, putative [Ixodes scapularis]	Ixodes scapularis/Ixodes scapularis			IPR000183;IPR002433;IPR009006;IPR022644;IPR022643;IPR029066;IPR002433;noIPR;IPR029066;IPR009006
TRINITY_DN100165_c2_g1_i3	ornithine decarboxylase, putative	1716	1	6.2E-177	89.46%	gi|241699676|ref|XP_002413144.1|ornithine decarboxylase, putative [Ixodes scapularis]/gi|215506958|gb|EEC16452.1| ornithine decarboxylase, putative [Ixodes scapularis]	Ixodes scapularis/Ixodes scapularis			IPR000183;IPR002433;IPR022644;IPR009006;IPR022643;IPR029066;IPR002433;noIPR;IPR009006;IPR029066
TRINITY_DN100165_c2_g1_i4	ornithine decarboxylase, putative	2352	1	1.5E-184	89.29%	gi|241699676|ref|XP_002413144.1|ornithine decarboxylase, putative [Ixodes scapularis]/gi|215506958|gb|EEC16452.1| ornithine decarboxylase, putative [Ixodes scapularis]	Ixodes scapularis/Ixodes scapularis			IPR000183;IPR002433;IPR022643;IPR022644;IPR009006;IPR029066;IPR002433;noIPR;IPR009006;IPR029066
TRINITY_DN100165_c3_g1_i1	oxidation resistance protein	827	1	5.9E-32	100.00%	gi|1318866917|gb|AUJ88034.1|oxidation resistance protein [Rhipicephalus microplus]	Rhipicephalus microplus			noIPR;noIPR;noIPR
TRINITY_DN100165_c3_g1_i2	oxidation resistance protein	2344	1	0.0E0	97.73%	gi|1318866917|gb|AUJ88034.1|oxidation resistance protein [Rhipicephalus microplus]	Rhipicephalus microplus			noIPR;noIPR;noIPR;noIPR;noIPR;noIPR;noIPR;noIPR;noIPR
TRINITY_DN100165_c3_g1_i3	oxidation resistance protein	2362	1	0.0E0	97.73%	gi|1318866917|gb|AUJ88034.1|oxidation resistance protein [Rhipicephalus microplus]	Rhipicephalus microplus			noIPR;noIPR;noIPR;noIPR;noIPR;noIPR;noIPR;noIPR;noIPR
TRINITY_DN100165_c3_g1_i4	oxidation resistance protein	1811	1	0.0E0	99.00%	gi|1318866917|gb|AUJ88034.1|oxidation resistance protein [Rhipicephalus microplus]	Rhipicephalus microplus			noIPR;noIPR;noIPR;noIPR;noIPR;noIPR;noIPR
TRINITY_DN100165_c3_g1_i5	oxidation resistance protein	809	1	5.8E-32	100.00%	gi|1318866917|gb|AUJ88034.1|oxidation resistance protein [Rhipicephalus microplus]	Rhipicephalus microplus			noIPR;noIPR;noIPR
TRINITY_DN100166_c0_g1_i1	ATP synthase c-subunit	7670	1	3.8E-64	97.32%	gi|29825397|gb|AAO92282.1|ATP synthase c-subunit [Dermacentor variabilis]	Dermacentor variabilis			IPR000454;IPR002379;IPR038662;noIPR;IPR000454;IPR000454;IPR035921
TRINITY_DN100166_c0_g1_i2	serum amyloid A-activating factor SAF-8, putative	6443	1	8.1E-36	83.94%	gi|242001462|ref|XP_002435374.1|serum amyloid A-activating factor SAF-8, putative [Ixodes scapularis]/gi|215498704|gb|EEC08198.1| serum amyloid A-activating factor SAF-8, putative [Ixodes scapularis]	Ixodes scapularis/Ixodes scapularis			noIPR;noIPR;noIPR;noIPR;noIPR;IPR013087;IPR036236
TRINITY_DN100168_c3_g1_i1	N6-adenine methylase involved in transcription regulation, putative	5966	1	8.2E-200	88.81%	gi|241573903|ref|XP_002403049.1|N6-adenine methylase involved in transcription regulation, putative [Ixodes scapularis]/gi|215502131|gb|EEC11625.1| N6-adenine methylase involved in transcription regulation, putative [Ixodes scapularis]	Ixodes scapularis/Ixodes scapularis	EC:2.1.1.62	mRNA (2'-O-methyladenosine-N(6)-)-methyltransferase	IPR007757;noIPR;noIPR;noIPR;noIPR;noIPR;IPR007757;noIPR;IPR029063
TRINITY_DN100168_c3_g1_i2	N6-adenine methylase involved in transcription regulation, putative	5966	1	8.2E-200	88.81%	gi|241573903|ref|XP_002403049.1|N6-adenine methylase involved in transcription regulation, putative [Ixodes scapularis]/gi|215502131|gb|EEC11625.1| N6-adenine methylase involved in transcription regulation, putative [Ixodes scapularis]	Ixodes scapularis/Ixodes scapularis	EC:2.1.1.62	mRNA (2'-O-methyladenosine-N(6)-)-methyltransferase	IPR007757;noIPR;noIPR;noIPR;noIPR;noIPR;IPR007757;noIPR;IPR029063
TRINITY_DN100170_c4_g1_i1	otopetrin, putative	2172	1	4.0E-128	74.93%	gi|241240068|ref|XP_002401616.1|otopetrin, putative [Ixodes scapularis]/gi|215496222|gb|EEC05863.1| otopetrin, putative [Ixodes scapularis]	Ixodes scapularis/Ixodes scapularis			IPR004878;IPR004878;noIPR
TRINITY_DN100170_c4_g1_i2	otopetrin, putative	535	1	1.1E-10	100.00%	gi|241240068|ref|XP_002401616.1|otopetrin, putative [Ixodes scapularis]/gi|215496222|gb|EEC05863.1| otopetrin, putative [Ixodes scapularis]	Ixodes scapularis/Ixodes scapularis
TRINITY_DN100170_c4_g1_i3	otopetrin, putative	1328	1	4.8E-84	66.35%	gi|241575356|ref|XP_002403477.1|otopetrin, putative [Ixodes scapularis]/gi|215500234|gb|EEC09728.1| otopetrin, putative [Ixodes scapularis]	Ixodes scapularis/Ixodes scapularis			IPR004878;IPR004878;noIPR
TRINITY_DN100172_c1_g2_i1	zinc finger MYM-type protein 6-like	2291	1	1.3E-36	59.50%	gi|449674289|ref|XP_004208147.1|PREDICTED: zinc finger MYM-type protein 6-like [Hydra vulgaris]	Hydra vulgaris			IPR025398
TRINITY_DN100172_c1_g2_i2	PREDICTED: uncharacterized protein LOC101241703	3100	1	8.0E-114	62.60%	gi|449692910|ref|XP_004213221.1|PREDICTED: uncharacterized protein LOC101241703 [Hydra vulgaris]	Hydra vulgaris			IPR025398;IPR026625;noIPR;IPR012337
TRINITY_DN100172_c1_g2_i4	zinc finger MYM-type protein 6-like	1834	1	1.4E-36	59.50%	gi|449674289|ref|XP_004208147.1|PREDICTED: zinc finger MYM-type protein 6-like [Hydra vulgaris]	Hydra vulgaris			IPR025398
TRINITY_DN100174_c3_g1_i1	hypothetical protein IscW_ISCW021590	6017	1	6.7E-242	68.86%	gi|241742593|ref|XP_002412392.1|hypothetical protein IscW_ISCW021590 [Ixodes scapularis]/gi|215505718|gb|EEC15212.1| hypothetical protein IscW_ISCW021590 [Ixodes scapularis]	Ixodes scapularis/Ixodes scapularis			IPR022587;IPR010569;IPR030564;noIPR;IPR010569;noIPR;IPR029021
TRINITY_DN100174_c3_g1_i2	hypothetical protein IscW_ISCW021590	6016	1	6.7E-242	68.86%	gi|241742593|ref|XP_002412392.1|hypothetical protein IscW_ISCW021590 [Ixodes scapularis]/gi|215505718|gb|EEC15212.1| hypothetical protein IscW_ISCW021590 [Ixodes scapularis]	Ixodes scapularis/Ixodes scapularis			IPR022587;IPR010569;IPR030564;noIPR;IPR010569;noIPR;IPR029021
TRINITY_DN100175_c1_g1_i2	transmembrane and TPR repeat-containing protein 4-like	4888	1	8.5E-70	63.75%	gi|1316170620|ref|XP_023230734.1|transmembrane and TPR repeat-containing protein 4-like [Centruroides sculpturatus]	Centruroides sculpturatus			noIPR;noIPR
TRINITY_DN100175_c1_g1_i3	transmembrane and TPR repeat-containing protein 4-like	2505	1	5.7E-54	75.77%	gi|926623019|ref|XP_013776914.1|transmembrane and TPR repeat-containing protein 4-like [Limulus polyphemus]	Limulus polyphemus			IPR011990;noIPR;IPR013618;noIPR;noIPR;noIPR;IPR019734;IPR013026;IPR019734;IPR019734;IPR019734;IPR019734;IPR019734;IPR011990
TRINITY_DN100175_c1_g1_i4	transmembrane and TPR repeat-containing protein 4-like	2380	1	5.4E-54	75.77%	gi|926623019|ref|XP_013776914.1|transmembrane and TPR repeat-containing protein 4-like [Limulus polyphemus]	Limulus polyphemus			IPR011990;noIPR;IPR013618;noIPR;noIPR;noIPR;IPR013026;IPR019734;IPR019734;IPR019734;IPR019734;IPR019734;IPR019734;IPR011990
TRINITY_DN100175_c1_g1_i5	transmembrane and TPR repeat-containing protein 4-like	3693	1	3.4E-127	64.84%	gi|926623019|ref|XP_013776914.1|transmembrane and TPR repeat-containing protein 4-like [Limulus polyphemus]	Limulus polyphemus			IPR011990;noIPR;noIPR;IPR013618;noIPR;noIPR;IPR013026;IPR019734;IPR019734;IPR019734;IPR019734;IPR019734;IPR019734;IPR011990
TRINITY_DN100175_c1_g1_i6	transmembrane and TPR repeat-containing protein 4-like	2505	1	5.7E-54	75.77%	gi|926623019|ref|XP_013776914.1|transmembrane and TPR repeat-containing protein 4-like [Limulus polyphemus]	Limulus polyphemus			IPR011990;noIPR;IPR013618;noIPR;noIPR;noIPR;IPR019734;IPR019734;IPR013026;IPR019734;IPR019734;IPR019734;IPR019734;IPR011990
TRINITY_DN100176_c1_g1_i1	AP-2 complex subunit beta-1, putative	3153	1	0.0E0	93.57%	gi|241709928|ref|XP_002412040.1|AP-2 complex subunit beta-1, putative [Ixodes scapularis]/gi|215505087|gb|EEC14581.1| AP-2 complex subunit beta-1, putative [Ixodes scapularis]	Ixodes scapularis/Ixodes scapularis			IPR011989;IPR002553;IPR013037;IPR008152;IPR016342;IPR015151;IPR012295;noIPR;IPR026739;noIPR;IPR009028;IPR016024;IPR013041
TRINITY_DN100176_c1_g1_i2	AP-2 complex subunit beta-1, putative	4405	1	0.0E0	93.30%	gi|241709928|ref|XP_002412040.1|AP-2 complex subunit beta-1, putative [Ixodes scapularis]/gi|215505087|gb|EEC14581.1| AP-2 complex subunit beta-1, putative [Ixodes scapularis]	Ixodes scapularis/Ixodes scapularis			IPR011989;IPR002553;IPR016342;IPR008152;IPR013037;IPR012295;IPR015151;noIPR;noIPR;IPR026739;IPR016024;IPR009028;IPR013041
TRINITY_DN100178_c0_g1_i1	conserved hypothetical protein	1630	1	8.0E-190	84.96%	gi|242001280|ref|XP_002435283.1|conserved hypothetical protein [Ixodes scapularis]/gi|215498613|gb|EEC08107.1| conserved hypothetical protein, partial [Ixodes scapularis]	Ixodes scapularis/Ixodes scapularis			noIPR;noIPR
TRINITY_DN100178_c0_g1_i2	conserved hypothetical protein	1420	1	3.1E-190	85.20%	gi|242001280|ref|XP_002435283.1|conserved hypothetical protein [Ixodes scapularis]/gi|215498613|gb|EEC08107.1| conserved hypothetical protein, partial [Ixodes scapularis]	Ixodes scapularis/Ixodes scapularis			noIPR;noIPR
TRINITY_DN100178_c0_g1_i4	conserved hypothetical protein	1252	1	6.5E-115	89.41%	gi|242001280|ref|XP_002435283.1|conserved hypothetical protein [Ixodes scapularis]/gi|215498613|gb|EEC08107.1| conserved hypothetical protein, partial [Ixodes scapularis]	Ixodes scapularis/Ixodes scapularis			noIPR;noIPR
TRINITY_DN100178_c1_g1_i1	conserved hypothetical protein	2087	1	9.5E-79	87.08%	gi|242001280|ref|XP_002435283.1|conserved hypothetical protein [Ixodes scapularis]/gi|215498613|gb|EEC08107.1| conserved hypothetical protein, partial [Ixodes scapularis]	Ixodes scapularis/Ixodes scapularis			noIPR;noIPR;noIPR;noIPR
TRINITY_DN100178_c1_g1_i2	conserved hypothetical protein	714	1	2.5E-79	87.08%	gi|242001280|ref|XP_002435283.1|conserved hypothetical protein [Ixodes scapularis]/gi|215498613|gb|EEC08107.1| conserved hypothetical protein, partial [Ixodes scapularis]	Ixodes scapularis/Ixodes scapularis			noIPR;noIPR;noIPR;noIPR
TRINITY_DN100178_c1_g1_i3	conserved hypothetical protein	1960	1	9.0E-79	87.08%	gi|242001280|ref|XP_002435283.1|conserved hypothetical protein [Ixodes scapularis]/gi|215498613|gb|EEC08107.1| conserved hypothetical protein, partial [Ixodes scapularis]	Ixodes scapularis/Ixodes scapularis			noIPR;noIPR;noIPR;noIPR
TRINITY_DN100178_c1_g1_i4	conserved hypothetical protein	1105	1	5.1E-79	87.08%	gi|242001280|ref|XP_002435283.1|conserved hypothetical protein [Ixodes scapularis]/gi|215498613|gb|EEC08107.1| conserved hypothetical protein, partial [Ixodes scapularis]	Ixodes scapularis/Ixodes scapularis			noIPR;noIPR;noIPR;noIPR
TRINITY_DN100179_c3_g1_i2	serine protease inhibitor 12 RmS12	4030	1	7.7E-226	99.75%	gi|568215833|gb|AHC98663.1|serine protease inhibitor 12 RmS12 [Rhipicephalus microplus]	Rhipicephalus microplus			noIPR;noIPR;IPR023796;IPR000215;noIPR;noIPR;IPR036186
TRINITY_DN100179_c3_g1_i3	serine protease inhibitor 12 RmS12	2863	1	5.4E-226	99.75%	gi|568215833|gb|AHC98663.1|serine protease inhibitor 12 RmS12 [Rhipicephalus microplus]	Rhipicephalus microplus			noIPR;noIPR;IPR023796;IPR000215;noIPR;noIPR;IPR036186
TRINITY_DN100179_c3_g1_i4	serine protease inhibitor 12 RmS12	3975	1	7.6E-226	99.75%	gi|568215833|gb|AHC98663.1|serine protease inhibitor 12 RmS12 [Rhipicephalus microplus]	Rhipicephalus microplus			noIPR;noIPR;IPR023796;IPR000215;noIPR;noIPR;IPR036186
TRINITY_DN100180_c0_g1_i13	Tbingi protein	899	1	3.3E-12	55.47%	gi|686628992|ref|XP_009307246.1|Tbingi protein [Trypanosoma grayi]/gi|657145125|gb|KEG14533.1| Tbingi protein [Trypanosoma grayi]	Trypanosoma grayi/Trypanosoma grayi			noIPR
TRINITY_DN100180_c0_g1_i14	putative ORF2	537	1	2.5E-7	54.26%	gi|51950578|gb|AAA70222.2|putative ORF2 [Drosophila melanogaster]	Drosophila melanogaster	EC:3.1.30;EC:3.1.26;EC:3.1.26.4	Acting on ester bonds;Acting on ester bonds;Ribonuclease H	IPR036397;IPR002156;noIPR;noIPR;IPR002156;noIPR;IPR012337
TRINITY_DN100182_c1_g1_i2	cell fate determining protein mab21l2, putative	3394	1	4.8E-213	99.73%	gi|242001058|ref|XP_002435172.1|cell fate determining protein mab21l2, putative [Ixodes scapularis]/gi|215498502|gb|EEC07996.1| cell fate determining protein mab21l2, putative [Ixodes scapularis]	Ixodes scapularis/Ixodes scapularis			noIPR;noIPR;IPR024810;noIPR;noIPR
TRINITY_DN100182_c1_g1_i4	cell fate determining protein mab21l2, putative	2936	1	4.2E-213	99.73%	gi|242001058|ref|XP_002435172.1|cell fate determining protein mab21l2, putative [Ixodes scapularis]/gi|215498502|gb|EEC07996.1| cell fate determining protein mab21l2, putative [Ixodes scapularis]	Ixodes scapularis/Ixodes scapularis			noIPR;noIPR;IPR024810;noIPR;noIPR
TRINITY_DN100183_c2_g1_i2	uncharacterized protein LOC111618738	3244	1	8.6E-103	60.03%	gi|1316142195|ref|XP_023216072.1|uncharacterized protein LOC111618738 [Centruroides sculpturatus]	Centruroides sculpturatus			IPR021896;noIPR;noIPR;noIPR
TRINITY_DN100184_c6_g3_i1	hypothetical protein IscW_ISCW011070	1324	1	3.6E-100	61.58%	gi|241672104|ref|XP_002411442.1|hypothetical protein IscW_ISCW011070 [Ixodes scapularis]/gi|215504093|gb|EEC13587.1| hypothetical protein IscW_ISCW011070 [Ixodes scapularis]	Ixodes scapularis/Ixodes scapularis			IPR036465;noIPR;IPR002035;IPR000436;noIPR;noIPR;IPR011641;noIPR;IPR000436;IPR000436;IPR002035;noIPR;IPR000436;IPR000436;IPR035976;IPR035976;IPR036465
TRINITY_DN100184_c6_g3_i2	hypothetical protein IscW_ISCW011070	2071	1	2.9E-184	60.35%	gi|241672104|ref|XP_002411442.1|hypothetical protein IscW_ISCW011070 [Ixodes scapularis]/gi|215504093|gb|EEC13587.1| hypothetical protein IscW_ISCW011070 [Ixodes scapularis]	Ixodes scapularis/Ixodes scapularis			IPR036465;IPR003410;IPR000436;IPR002035;IPR011641;noIPR;noIPR;noIPR;noIPR;IPR028768;noIPR;noIPR;IPR028768;IPR003410;IPR000436;IPR002035;IPR000436;IPR000436;IPR003410;IPR000436;IPR000436;noIPR;IPR000436;IPR000436;IPR035976;IPR036465;IPR035976;IPR035976;IPR035976
TRINITY_DN100184_c6_g3_i4	hypothetical protein IscW_ISCW011070	2208	1	1.3E-182	60.21%	gi|241672104|ref|XP_002411442.1|hypothetical protein IscW_ISCW011070 [Ixodes scapularis]/gi|215504093|gb|EEC13587.1| hypothetical protein IscW_ISCW011070 [Ixodes scapularis]	Ixodes scapularis/Ixodes scapularis			noIPR;IPR003410;IPR036465;IPR002035;noIPR;noIPR;IPR000436;IPR011641;noIPR;noIPR;IPR002035;IPR000436;IPR000436;IPR003410;IPR000436;IPR003410;IPR000436;IPR000436;noIPR;IPR000436;IPR000436;IPR035976;IPR035976;IPR036465;IPR035976;IPR035976
TRINITY_DN100184_c6_g3_i5	hypothetical protein IscW_ISCW011070	1839	1	2.0E-144	58.23%	gi|241672104|ref|XP_002411442.1|hypothetical protein IscW_ISCW011070 [Ixodes scapularis]/gi|215504093|gb|EEC13587.1| hypothetical protein IscW_ISCW011070 [Ixodes scapularis]	Ixodes scapularis/Ixodes scapularis			IPR011641;noIPR;noIPR;noIPR;noIPR;IPR003410;IPR000436;IPR002035;IPR036465;noIPR;noIPR;noIPR;IPR002035;IPR000436;IPR000436;IPR000436;IPR003410;IPR000436;noIPR;IPR000436;IPR000436;IPR035976;IPR035976;IPR035976;IPR036465
TRINITY_DN100185_c3_g1_i1	zinc finger protein, putative	2648	1	7.6E-65	54.94%	gi|241152814|ref|XP_002406955.1|zinc finger protein, putative [Ixodes scapularis]/gi|215493983|gb|EEC03624.1| zinc finger protein, putative [Ixodes scapularis]	Ixodes scapularis/Ixodes scapularis			noIPR;noIPR;noIPR;IPR013087;noIPR;noIPR;noIPR;noIPR;IPR013087;IPR013087;IPR013087;IPR013087;IPR013087;IPR013087;IPR036236;IPR036236;IPR036236
TRINITY_DN100185_c3_g1_i3	zinc finger protein, putative	2226	1	8.4E-65	54.94%	gi|241152814|ref|XP_002406955.1|zinc finger protein, putative [Ixodes scapularis]/gi|215493983|gb|EEC03624.1| zinc finger protein, putative [Ixodes scapularis]	Ixodes scapularis/Ixodes scapularis			noIPR;noIPR;IPR013087;noIPR;noIPR;noIPR;noIPR;noIPR;IPR013087;IPR013087;IPR013087;IPR013087;IPR013087;IPR013087;IPR036236;IPR036236;IPR036236
TRINITY_DN100185_c3_g1_i4	zinc finger protein, putative	839	1	1.5E-19	80.90%	gi|241152814|ref|XP_002406955.1|zinc finger protein, putative [Ixodes scapularis]/gi|215493983|gb|EEC03624.1| zinc finger protein, putative [Ixodes scapularis]	Ixodes scapularis/Ixodes scapularis			noIPR;IPR013087;noIPR;noIPR;noIPR;noIPR;noIPR;noIPR;noIPR;noIPR;IPR013087;IPR013087;IPR013087;IPR013087;IPR036236;IPR036236;IPR036236
TRINITY_DN100186_c0_g1_i1	hypothetical protein IscW_ISCW018317	821	1	1.2E-24	62.50%	gi|241239018|ref|XP_002401455.1|hypothetical protein IscW_ISCW018317 [Ixodes scapularis]/gi|215496177|gb|EEC05818.1| hypothetical protein IscW_ISCW018317 [Ixodes scapularis]	Ixodes scapularis/Ixodes scapularis			noIPR
TRINITY_DN100186_c0_g1_i10	hypothetical protein IscW_ISCW018317	709	1	4.6E-25	62.50%	gi|241239018|ref|XP_002401455.1|hypothetical protein IscW_ISCW018317 [Ixodes scapularis]/gi|215496177|gb|EEC05818.1| hypothetical protein IscW_ISCW018317 [Ixodes scapularis]	Ixodes scapularis/Ixodes scapularis			noIPR
TRINITY_DN100186_c0_g1_i2	hypothetical protein IscW_ISCW018317	531	1	6.9E-26	62.16%	gi|241239018|ref|XP_002401455.1|hypothetical protein IscW_ISCW018317 [Ixodes scapularis]/gi|215496177|gb|EEC05818.1| hypothetical protein IscW_ISCW018317 [Ixodes scapularis]	Ixodes scapularis/Ixodes scapularis			noIPR
TRINITY_DN100186_c0_g1_i3	hypothetical protein IscW_ISCW018317	824	1	5.3E-25	62.50%	gi|241239018|ref|XP_002401455.1|hypothetical protein IscW_ISCW018317 [Ixodes scapularis]/gi|215496177|gb|EEC05818.1| hypothetical protein IscW_ISCW018317 [Ixodes scapularis]	Ixodes scapularis/Ixodes scapularis			noIPR
TRINITY_DN100186_c0_g1_i6	hypothetical protein IscW_ISCW018317	707	1	1.0E-24	62.50%	gi|241239018|ref|XP_002401455.1|hypothetical protein IscW_ISCW018317 [Ixodes scapularis]/gi|215496177|gb|EEC05818.1| hypothetical protein IscW_ISCW018317 [Ixodes scapularis]	Ixodes scapularis/Ixodes scapularis			noIPR
TRINITY_DN100186_c0_g1_i8	hypothetical protein IscW_ISCW018317	700	1	1.2E-25	62.16%	gi|241239018|ref|XP_002401455.1|hypothetical protein IscW_ISCW018317 [Ixodes scapularis]/gi|215496177|gb|EEC05818.1| hypothetical protein IscW_ISCW018317 [Ixodes scapularis]	Ixodes scapularis/Ixodes scapularis			noIPR
TRINITY_DN100186_c0_g1_i9	hypothetical protein IscW_ISCW018317	707	1	1.0E-24	62.50%	gi|241239018|ref|XP_002401455.1|hypothetical protein IscW_ISCW018317 [Ixodes scapularis]/gi|215496177|gb|EEC05818.1| hypothetical protein IscW_ISCW018317 [Ixodes scapularis]	Ixodes scapularis/Ixodes scapularis			noIPR
TRINITY_DN100187_c3_g1_i1	transcription initiation factor IID subunit	892	1	1.3E-21	100.00%	gi|114153252|gb|ABI52792.1|transcription initiation factor IID subunit [Argas monolakensis]	Argas monolakensis			IPR003195;noIPR;IPR003195
TRINITY_DN100187_c3_g1_i2	transcription initiation factor IID subunit	925	1	1.4E-21	100.00%	gi|114153252|gb|ABI52792.1|transcription initiation factor IID subunit [Argas monolakensis]	Argas monolakensis			IPR003195;noIPR;IPR003195
TRINITY_DN100187_c5_g1_i1	ATPase, putative	2595	1	1.4E-196	86.80%	gi|241997550|ref|XP_002433424.1|ATPase, putative [Ixodes scapularis]/gi|215490847|gb|EEC00488.1| ATPase, putative [Ixodes scapularis]	Ixodes scapularis/Ixodes scapularis			IPR005654;noIPR;IPR005654;noIPR;IPR027417
TRINITY_DN100187_c5_g1_i2	ATPase, putative	2591	1	1.4E-196	86.80%	gi|241997550|ref|XP_002433424.1|ATPase, putative [Ixodes scapularis]/gi|215490847|gb|EEC00488.1| ATPase, putative [Ixodes scapularis]	Ixodes scapularis/Ixodes scapularis			IPR005654;noIPR;IPR005654;noIPR;IPR027417
TRINITY_DN100187_c5_g1_i4	ATPase, putative	1334	1	2.1E-47	92.06%	gi|241997550|ref|XP_002433424.1|ATPase, putative [Ixodes scapularis]/gi|215490847|gb|EEC00488.1| ATPase, putative [Ixodes scapularis]	Ixodes scapularis/Ixodes scapularis			IPR005654;IPR005654
TRINITY_DN100188_c6_g1_i1	transmembrane protein 39A-like	4536	1	1.1E-82	57.82%	gi|1316141940|ref|XP_023215944.1|transmembrane protein 39A-like [Centruroides sculpturatus]	Centruroides sculpturatus			IPR019397;IPR019397;noIPR
TRINITY_DN100188_c6_g1_i2	transmembrane protein 39A-like	4536	1	1.1E-82	57.82%	gi|1316141940|ref|XP_023215944.1|transmembrane protein 39A-like [Centruroides sculpturatus]	Centruroides sculpturatus			IPR019397;IPR019397;noIPR
TRINITY_DN100190_c3_g1_i1	hypothetical protein IscW_ISCW003598	3757	1	1.3E-179	61.34%	gi|241238067|ref|XP_002401246.1|hypothetical protein IscW_ISCW003598 [Ixodes scapularis]/gi|215496142|gb|EEC05783.1| hypothetical protein IscW_ISCW003598 [Ixodes scapularis]	Ixodes scapularis/Ixodes scapularis			IPR012496;noIPR;noIPR;IPR038900;noIPR
TRINITY_DN100190_c3_g1_i2	hypothetical protein IscW_ISCW003598	3541	1	1.2E-179	61.34%	gi|241238067|ref|XP_002401246.1|hypothetical protein IscW_ISCW003598 [Ixodes scapularis]/gi|215496142|gb|EEC05783.1| hypothetical protein IscW_ISCW003598 [Ixodes scapularis]	Ixodes scapularis/Ixodes scapularis			IPR012496;noIPR;noIPR;IPR038900;noIPR
TRINITY_DN100191_c2_g1_i1	Dscam, partial	3313	1	6.3E-234	70.07%	gi|1016200908|gb|AMW93201.1|Dscam, partial [Mesobuthus martensii]	Mesobuthus martensii			noIPR;IPR003961;IPR013783;IPR013783;IPR013783;IPR013783;noIPR;noIPR;IPR003961;IPR003961;IPR003961;IPR003961;IPR003961;IPR003961;IPR003961;IPR003961;IPR036116;IPR036116;IPR036179
TRINITY_DN100191_c2_g1_i3	Dscam, partial	3231	1	4.4E-216	70.86%	gi|1016200908|gb|AMW93201.1|Dscam, partial [Mesobuthus martensii]	Mesobuthus martensii			noIPR;IPR013783;IPR013783;IPR013783;IPR013783;IPR003961;noIPR;IPR003961;IPR003961;IPR003961;IPR003961;IPR003961;IPR003961;IPR003961;IPR003961;IPR036116;IPR036179;IPR036116
TRINITY_DN100192_c3_g1_i1	UBX domain-containing protein 4	5124	1	1.4E-99	100.00%	gi|696123048|gb|AIT40221.1|UBX domain-containing protein 4 [Rhipicephalus microplus]	Rhipicephalus microplus			noIPR;IPR001012;noIPR;noIPR;noIPR;noIPR;noIPR;IPR001012;IPR029071
TRINITY_DN100192_c3_g1_i4	UBX domain-containing protein 4	3308	1	9.1E-100	100.00%	gi|696123048|gb|AIT40221.1|UBX domain-containing protein 4 [Rhipicephalus microplus]	Rhipicephalus microplus			noIPR;IPR001012;noIPR;noIPR;noIPR;noIPR;noIPR;IPR001012;IPR029071
TRINITY_DN100192_c3_g1_i5	UBX domain-containing protein 4	4267	1	1.2E-99	100.00%	gi|696123048|gb|AIT40221.1|UBX domain-containing protein 4 [Rhipicephalus microplus]	Rhipicephalus microplus			IPR001012;noIPR;noIPR;noIPR;noIPR;noIPR;noIPR;IPR001012;IPR029071
TRINITY_DN100195_c5_g1_i4	D-beta-hydroxybutyrate dehydrogenase, mitochondrial-like	818	1	2.6E-32	65.54%	gi|1078804990|ref|XP_018494996.1|PREDICTED: D-beta-hydroxybutyrate dehydrogenase, mitochondrial-like [Galendromus occidentalis]	Galendromus occidentalis			IPR002347;noIPR;noIPR;noIPR;IPR036291
TRINITY_DN100195_c5_g2_i1	17-beta-hydroxysteroid dehydrogenase type 6-like	1080	1	4.2E-30	64.46%	gi|1253682186|ref|XP_022644483.1|17-beta-hydroxysteroid dehydrogenase type 6-like [Varroa destructor]	Varroa destructor			IPR002347;noIPR;noIPR;IPR036291
TRINITY_DN100195_c5_g2_i2	17-beta-hydroxysteroid dehydrogenase type 6-like	705	1	2.5E-31	65.06%	gi|1253682186|ref|XP_022644483.1|17-beta-hydroxysteroid dehydrogenase type 6-like [Varroa destructor]	Varroa destructor			IPR002347;noIPR;noIPR;IPR036291
TRINITY_DN100195_c5_g2_i3	17-beta-hydroxysteroid dehydrogenase type 6-like	1080	1	1.1E-30	64.46%	gi|1253682186|ref|XP_022644483.1|17-beta-hydroxysteroid dehydrogenase type 6-like [Varroa destructor]	Varroa destructor			IPR002347;noIPR;noIPR;IPR036291
TRINITY_DN100197_c4_g1_i1	hypothetical protein BOX15_Mlig023895g2	530	1	6.4E-56	77.65%	gi|1236551707|gb|PAA74202.1|hypothetical protein BOX15_Mlig023895g2 [Macrostomum lignano]	Macrostomum lignano			IPR004859;noIPR;IPR027073
TRINITY_DN100197_c4_g2_i1	5'-3' exoribonuclease 2-like isoform X1	614	1	1.6E-26	60.93%	gi|926620245|ref|XP_013775406.1|5'-3' exoribonuclease 2-like isoform X1 [Limulus polyphemus]/gi|926620247|ref|XP_013775408.1| 5'-3' exoribonuclease 2-like isoform X1 [Limulus polyphemus]	Limulus polyphemus/Limulus polyphemus			IPR041412;noIPR;IPR027073;noIPR
TRINITY_DN100197_c4_g3_i1	3' exoribonuclease, putative	1142	1	6.3E-101	63.59%	gi|241786594|ref|XP_002414458.1|5'-/3' exoribonuclease, putative [Ixodes scapularis]/gi|215508669|gb|EEC18123.1| 5'-/3' exoribonuclease, putative, partial [Ixodes scapularis]	Ixodes scapularis/Ixodes scapularis			noIPR;IPR041412;noIPR;IPR004859;noIPR;noIPR;IPR027073;noIPR
TRINITY_DN100199_c0_g1_i1	hypothetical protein AWC38_SpisGene25287, partial	615	1	8.9E-25	61.35%	gi|1263111679|gb|PFX11170.1|hypothetical protein AWC38_SpisGene25287, partial [Stylophora pistillata]	Stylophora pistillata			noIPR;noIPR;noIPR;noIPR
TRINITY_DN100201_c0_g1_i1	hypothetical protein IscW_ISCW015906	578	1	5.4E-16	61.18%	gi|240981274|ref|XP_002403695.1|hypothetical protein IscW_ISCW015906 [Ixodes scapularis]/gi|215491418|gb|EEC01059.1| hypothetical protein IscW_ISCW015906 [Ixodes scapularis]	Ixodes scapularis/Ixodes scapularis
TRINITY_DN100201_c0_g1_i3	hypothetical protein IscW_ISCW015906	1292	1	5.4E-16	61.36%	gi|240981274|ref|XP_002403695.1|hypothetical protein IscW_ISCW015906 [Ixodes scapularis]/gi|215491418|gb|EEC01059.1| hypothetical protein IscW_ISCW015906 [Ixodes scapularis]	Ixodes scapularis/Ixodes scapularis
TRINITY_DN100201_c0_g1_i4	hypothetical protein IscW_ISCW015906	1292	1	5.8E-18	63.64%	gi|240981274|ref|XP_002403695.1|hypothetical protein IscW_ISCW015906 [Ixodes scapularis]/gi|215491418|gb|EEC01059.1| hypothetical protein IscW_ISCW015906 [Ixodes scapularis]	Ixodes scapularis/Ixodes scapularis
TRINITY_DN100201_c0_g1_i6	hypothetical protein IscW_ISCW015906	614	1	9.8E-16	64.94%	gi|240981274|ref|XP_002403695.1|hypothetical protein IscW_ISCW015906 [Ixodes scapularis]/gi|215491418|gb|EEC01059.1| hypothetical protein IscW_ISCW015906 [Ixodes scapularis]	Ixodes scapularis/Ixodes scapularis			noIPR
TRINITY_DN100201_c0_g1_i7	hypothetical protein IscW_ISCW015906	1292	1	7.1E-16	60.23%	gi|240981274|ref|XP_002403695.1|hypothetical protein IscW_ISCW015906 [Ixodes scapularis]/gi|215491418|gb|EEC01059.1| hypothetical protein IscW_ISCW015906 [Ixodes scapularis]	Ixodes scapularis/Ixodes scapularis
TRINITY_DN100201_c1_g1_i1	translation initiation factor, putative	577	1	6.7E-67	97.78%	gi|241619903|ref|XP_002408609.1|translation initiation factor, putative [Ixodes scapularis]/gi|215503000|gb|EEC12494.1| translation initiation factor, putative [Ixodes scapularis]	Ixodes scapularis/Ixodes scapularis			IPR002769;noIPR;IPR002769;IPR002769;IPR002769;noIPR
TRINITY_DN100201_c1_g1_i2	translation initiation factor, putative	695	1	9.3E-47	98.00%	gi|241619903|ref|XP_002408609.1|translation initiation factor, putative [Ixodes scapularis]/gi|215503000|gb|EEC12494.1| translation initiation factor, putative [Ixodes scapularis]	Ixodes scapularis/Ixodes scapularis			IPR002769;noIPR;IPR002769;noIPR;noIPR
TRINITY_DN100202_c5_g1_i1	mannosyltransferase 1, putative	4588	1	0.0E0	87.67%	gi|241862484|ref|XP_002416386.1|mannosyltransferase 1, putative [Ixodes scapularis]/gi|215510600|gb|EEC20053.1| mannosyltransferase 1, putative, partial [Ixodes scapularis]	Ixodes scapularis/Ixodes scapularis			noIPR;IPR003342;IPR032421;IPR016093;noIPR;noIPR;IPR027005;IPR016093;IPR016093;IPR016093;IPR036300
TRINITY_DN100202_c5_g1_i2	mannosyltransferase 1, putative	3019	1	1.6E-98	87.56%	gi|241862484|ref|XP_002416386.1|mannosyltransferase 1, putative [Ixodes scapularis]/gi|215510600|gb|EEC20053.1| mannosyltransferase 1, putative, partial [Ixodes scapularis]	Ixodes scapularis/Ixodes scapularis			IPR003342;noIPR;noIPR;IPR027005
TRINITY_DN100202_c5_g1_i3	mannosyltransferase 1, putative	1455	1	9.5E-219	88.17%	gi|241862484|ref|XP_002416386.1|mannosyltransferase 1, putative [Ixodes scapularis]/gi|215510600|gb|EEC20053.1| mannosyltransferase 1, putative, partial [Ixodes scapularis]	Ixodes scapularis/Ixodes scapularis			noIPR;IPR032421;IPR016093;IPR027005;noIPR;IPR016093;IPR016093;IPR016093;IPR036300
TRINITY_DN100202_c5_g1_i4	mannosyltransferase 1, putative	693	1	7.2E-23	93.44%	gi|241862484|ref|XP_002416386.1|mannosyltransferase 1, putative [Ixodes scapularis]/gi|215510600|gb|EEC20053.1| mannosyltransferase 1, putative, partial [Ixodes scapularis]	Ixodes scapularis/Ixodes scapularis	EC:2.4.1.109	Dolichyl-phosphate-mannose--protein mannosyltransferase
TRINITY_DN100203_c5_g1_i1	serine/threonine-protein kinase SIK3-like isoform X1	6648	1	1.1E-274	59.46%	gi|1316193931|ref|XP_023242845.1|serine/threonine-protein kinase SIK3-like isoform X1 [Centruroides sculpturatus]	Centruroides sculpturatus	EC:2.7.11	Transferring phosphorus-containing groups	IPR000719;IPR001772;noIPR;noIPR;noIPR;noIPR;noIPR;noIPR;noIPR;noIPR;noIPR;noIPR;noIPR;IPR001772;IPR000719;IPR034672;noIPR;IPR028375;IPR011009
TRINITY_DN100203_c5_g1_i2	Serine/threonine-protein kinase SIK3-like protein	950	1	3.1E-8	75.44%	gi|675364195|gb|KFM57097.1|Serine/threonine-protein kinase SIK3-like protein, partial [Stegodyphus mimosarum]	Stegodyphus mimosarum			noIPR;noIPR;noIPR;IPR011009
TRINITY_DN100203_c5_g1_i3	serine/threonine-protein kinase SIK3-like isoform X1	6647	1	1.1E-274	59.46%	gi|1316193931|ref|XP_023242845.1|serine/threonine-protein kinase SIK3-like isoform X1 [Centruroides sculpturatus]	Centruroides sculpturatus	EC:2.7.11	Transferring phosphorus-containing groups	IPR000719;IPR001772;noIPR;noIPR;noIPR;noIPR;noIPR;noIPR;noIPR;noIPR;noIPR;noIPR;noIPR;IPR001772;IPR000719;IPR034672;noIPR;IPR028375;IPR011009
TRINITY_DN100203_c5_g1_i4	serine/threonine-protein kinase SIK3-like isoform X1	6103	1	1.0E-274	59.46%	gi|1316193931|ref|XP_023242845.1|serine/threonine-protein kinase SIK3-like isoform X1 [Centruroides sculpturatus]	Centruroides sculpturatus	EC:2.7.11	Transferring phosphorus-containing groups	IPR000719;IPR001772;noIPR;noIPR;noIPR;noIPR;noIPR;noIPR;noIPR;noIPR;noIPR;noIPR;noIPR;IPR001772;IPR000719;IPR034672;noIPR;IPR028375;IPR011009
TRINITY_DN100203_c5_g1_i6	serine/threonine-protein kinase SIK3-like isoform X1	6647	1	1.1E-274	59.46%	gi|1316193931|ref|XP_023242845.1|serine/threonine-protein kinase SIK3-like isoform X1 [Centruroides sculpturatus]	Centruroides sculpturatus	EC:2.7.11	Transferring phosphorus-containing groups	IPR000719;IPR001772;noIPR;noIPR;noIPR;noIPR;noIPR;noIPR;noIPR;noIPR;noIPR;noIPR;noIPR;IPR001772;IPR000719;IPR034672;noIPR;IPR028375;IPR011009
TRINITY_DN100203_c5_g1_i7	serine/threonine-protein kinase SIK3-like isoform X1	6081	1	1.8E-274	59.38%	gi|1316193931|ref|XP_023242845.1|serine/threonine-protein kinase SIK3-like isoform X1 [Centruroides sculpturatus]	Centruroides sculpturatus	EC:2.7.11	Transferring phosphorus-containing groups	IPR001772;IPR000719;noIPR;noIPR;noIPR;noIPR;noIPR;noIPR;noIPR;noIPR;noIPR;noIPR;noIPR;IPR001772;IPR000719;IPR034672;noIPR;IPR028375;IPR011009
TRINITY_DN100203_c5_g1_i8	serine/threonine-protein kinase SIK3-like isoform X1	6103	1	1.0E-274	59.46%	gi|1316193931|ref|XP_023242845.1|serine/threonine-protein kinase SIK3-like isoform X1 [Centruroides sculpturatus]	Centruroides sculpturatus	EC:2.7.11	Transferring phosphorus-containing groups	IPR000719;IPR001772;noIPR;noIPR;noIPR;noIPR;noIPR;noIPR;noIPR;noIPR;noIPR;noIPR;noIPR;IPR001772;IPR000719;IPR034672;noIPR;IPR028375;IPR011009
TRINITY_DN100204_c4_g1_i1	carrier protein, putative	4192	1	6.7E-140	88.41%	gi|241330505|ref|XP_002408328.1|carrier protein, putative [Ixodes scapularis]/gi|215497305|gb|EEC06799.1| carrier protein, putative [Ixodes scapularis]	Ixodes scapularis/Ixodes scapularis			IPR023395;IPR018108;IPR040062;noIPR;IPR018108;IPR018108;IPR018108;IPR023395
TRINITY_DN100204_c4_g1_i3	carrier protein, putative	2867	1	4.6E-140	88.41%	gi|241330505|ref|XP_002408328.1|carrier protein, putative [Ixodes scapularis]/gi|215497305|gb|EEC06799.1| carrier protein, putative [Ixodes scapularis]	Ixodes scapularis/Ixodes scapularis			IPR023395;IPR018108;IPR040062;noIPR;IPR018108;IPR018108;IPR018108;IPR023395
TRINITY_DN100204_c4_g1_i4	carrier protein, putative	2741	1	4.4E-140	88.41%	gi|241330505|ref|XP_002408328.1|carrier protein, putative [Ixodes scapularis]/gi|215497305|gb|EEC06799.1| carrier protein, putative [Ixodes scapularis]	Ixodes scapularis/Ixodes scapularis			IPR023395;IPR018108;IPR040062;noIPR;IPR018108;IPR018108;IPR018108;IPR023395
TRINITY_DN100204_c4_g1_i5	carrier protein, putative	4043	1	6.5E-140	88.41%	gi|241330505|ref|XP_002408328.1|carrier protein, putative [Ixodes scapularis]/gi|215497305|gb|EEC06799.1| carrier protein, putative [Ixodes scapularis]	Ixodes scapularis/Ixodes scapularis			IPR023395;IPR018108;IPR040062;noIPR;IPR018108;IPR018108;IPR018108;IPR023395
TRINITY_DN100206_c2_g1_i1	NADH dehydrogenase 1 alpha subcomplex	1047	1	7.8E-29	90.12%	gi|172051208|gb|ACB70379.1|NADH dehydrogenase 1 alpha subcomplex [Ornithodoros coriaceus]	Ornithodoros coriaceus			IPR010530;IPR010530;noIPR
TRINITY_DN100206_c2_g1_i3	NADH dehydrogenase 1 alpha subcomplex	956	1	7.1E-29	90.12%	gi|172051208|gb|ACB70379.1|NADH dehydrogenase 1 alpha subcomplex [Ornithodoros coriaceus]	Ornithodoros coriaceus			IPR010530;IPR010530;noIPR
TRINITY_DN100206_c2_g1_i4	NADH dehydrogenase 1 alpha subcomplex	799	1	7.7E-21	88.06%	gi|172051208|gb|ACB70379.1|NADH dehydrogenase 1 alpha subcomplex [Ornithodoros coriaceus]	Ornithodoros coriaceus			IPR010530;noIPR;IPR010530
TRINITY_DN100207_c2_g2_i1	serine threonine protein kinase, putative	6055	1	0.0E0	76.21%	gi|241748164|ref|XP_002414373.1|serine threonine protein kinase, putative [Ixodes scapularis]/gi|215508227|gb|EEC17681.1| serine threonine protein kinase, putative, partial [Ixodes scapularis]	Ixodes scapularis/Ixodes scapularis			IPR015943;IPR000719;IPR038357;noIPR;noIPR;IPR002372;IPR010513;noIPR;noIPR;noIPR;noIPR;noIPR;noIPR;noIPR;noIPR;noIPR;noIPR;noIPR;IPR010513;IPR000719;noIPR;noIPR;noIPR;IPR011047;IPR011009
TRINITY_DN100210_c0_g1_i1	conserved hypothetical protein	1045	1	5.7E-48	94.50%	gi|241253047|ref|XP_002403787.1|conserved hypothetical protein [Ixodes scapularis]/gi|215496561|gb|EEC06201.1| conserved hypothetical protein [Ixodes scapularis]	Ixodes scapularis/Ixodes scapularis			IPR023572;IPR036820;IPR002804;IPR023572;IPR036820
TRINITY_DN100210_c0_g1_i2	protein archease-like	704	1	1.9E-31	71.77%	gi|1316136507|ref|XP_023235940.1|protein archease-like [Centruroides sculpturatus]	Centruroides sculpturatus			IPR023572;IPR036820;IPR002804;IPR023572;IPR036820
TRINITY_DN100210_c0_g1_i3	protein archease-like	1530	1	8.6E-61	82.32%	gi|1316136507|ref|XP_023235940.1|protein archease-like [Centruroides sculpturatus]	Centruroides sculpturatus			IPR023572;IPR036820;IPR002804;IPR023572;IPR036820
TRINITY_DN100210_c1_g1_i1	RNA helicase, putative	4024	1	3.4E-181	84.70%	gi|241253045|ref|XP_002403786.1|RNA helicase, putative [Ixodes scapularis]/gi|215496560|gb|EEC06200.1| RNA helicase, putative, partial [Ixodes scapularis]	Ixodes scapularis/Ixodes scapularis			IPR011545;IPR001650;noIPR;noIPR;noIPR;noIPR;noIPR;noIPR;noIPR;noIPR;noIPR;IPR001650;IPR014001;IPR014014;IPR001650;IPR027417
TRINITY_DN100210_c1_g1_i2	RNA helicase, putative	3230	1	2.7E-181	84.70%	gi|241253045|ref|XP_002403786.1|RNA helicase, putative [Ixodes scapularis]/gi|215496560|gb|EEC06200.1| RNA helicase, putative, partial [Ixodes scapularis]	Ixodes scapularis/Ixodes scapularis			IPR011545;IPR001650;noIPR;noIPR;noIPR;noIPR;noIPR;noIPR;noIPR;noIPR;noIPR;IPR001650;IPR014001;IPR014014;IPR001650;IPR027417
TRINITY_DN100210_c1_g1_i3	RNA helicase, putative	3318	1	2.8E-181	84.70%	gi|241253045|ref|XP_002403786.1|RNA helicase, putative [Ixodes scapularis]/gi|215496560|gb|EEC06200.1| RNA helicase, putative, partial [Ixodes scapularis]	Ixodes scapularis/Ixodes scapularis			IPR011545;noIPR;IPR001650;noIPR;noIPR;noIPR;noIPR;noIPR;noIPR;noIPR;noIPR;IPR001650;IPR014001;IPR014014;IPR001650;IPR027417
TRINITY_DN100210_c1_g1_i4	RNA helicase, putative	4007	1	3.4E-181	84.70%	gi|241253045|ref|XP_002403786.1|RNA helicase, putative [Ixodes scapularis]/gi|215496560|gb|EEC06200.1| RNA helicase, putative, partial [Ixodes scapularis]	Ixodes scapularis/Ixodes scapularis			IPR011545;noIPR;IPR001650;noIPR;noIPR;noIPR;noIPR;noIPR;noIPR;noIPR;noIPR;IPR001650;IPR014001;IPR014014;IPR001650;IPR027417
TRINITY_DN100210_c1_g1_i6	RNA helicase, putative	3207	1	2.7E-181	84.70%	gi|241253045|ref|XP_002403786.1|RNA helicase, putative [Ixodes scapularis]/gi|215496560|gb|EEC06200.1| RNA helicase, putative, partial [Ixodes scapularis]	Ixodes scapularis/Ixodes scapularis			IPR011545;IPR001650;noIPR;noIPR;noIPR;noIPR;noIPR;noIPR;noIPR;noIPR;noIPR;IPR001650;IPR014001;IPR014014;IPR001650;IPR027417
TRINITY_DN100210_c1_g1_i7	RNA helicase, putative	3624	1	3.0E-181	84.70%	gi|241253045|ref|XP_002403786.1|RNA helicase, putative [Ixodes scapularis]/gi|215496560|gb|EEC06200.1| RNA helicase, putative, partial [Ixodes scapularis]	Ixodes scapularis/Ixodes scapularis			IPR011545;noIPR;IPR001650;noIPR;noIPR;noIPR;noIPR;noIPR;noIPR;noIPR;noIPR;IPR001650;IPR014001;IPR014014;IPR001650;IPR027417
TRINITY_DN100212_c0_g1_i1	TPA_inf: cation transport regulator-like protein 2	1165	1	1.9E-92	95.48%	gi|325302774|tpg|DAA34409.1|TPA_inf: cation transport regulator-like protein 2 [Amblyomma variegatum]	Amblyomma variegatum	EC:4.3.2.9	Gamma-glutamylcyclotransferase	IPR006840;noIPR;noIPR;noIPR;noIPR;IPR006840;noIPR;IPR013024;IPR036568
TRINITY_DN100212_c0_g1_i2	TPA_inf: cation transport regulator-like protein 2	1291	1	2.1E-92	95.48%	gi|325302774|tpg|DAA34409.1|TPA_inf: cation transport regulator-like protein 2 [Amblyomma variegatum]	Amblyomma variegatum	EC:4.3.2.9	Gamma-glutamylcyclotransferase	IPR006840;noIPR;noIPR;noIPR;noIPR;IPR006840;noIPR;IPR013024;IPR036568
TRINITY_DN100212_c0_g1_i6	TPA_inf: cation transport regulator-like protein 2	1531	1	6.8E-82	65.76%	gi|325302774|tpg|DAA34409.1|TPA_inf: cation transport regulator-like protein 2 [Amblyomma variegatum]	Amblyomma variegatum	EC:4.3.2.9	Gamma-glutamylcyclotransferase	noIPR;IPR006840;noIPR;noIPR;noIPR;IPR006840;noIPR;IPR013024;IPR036568
TRINITY_DN100212_c0_g1_i7	TPA_inf: cation transport regulator-like protein 2	963	1	1.6E-92	95.48%	gi|325302774|tpg|DAA34409.1|TPA_inf: cation transport regulator-like protein 2 [Amblyomma variegatum]	Amblyomma variegatum	EC:4.3.2.9	Gamma-glutamylcyclotransferase	noIPR;IPR006840;noIPR;noIPR;noIPR;IPR006840;noIPR;IPR013024;IPR036568
TRINITY_DN100213_c5_g1_i1	putative intracellular cystatin	502	1	2.2E-29	84.38%	gi|194246041|gb|ACF35512.1|putative intracellular cystatin [Dermacentor variabilis]	Dermacentor variabilis			IPR001713;IPR000010;noIPR;IPR001713;noIPR;IPR000010;noIPR
TRINITY_DN100213_c5_g1_i2	phosphatase/kinase domain-containing protein, putative	7708	1	2.4E-268	92.28%	gi|241688878|ref|XP_002411731.1|phosphatase/kinase domain-containing protein, putative [Ixodes scapularis]/gi|215504551|gb|EEC14045.1| phosphatase/kinase domain-containing protein, putative [Ixodes scapularis]	Ixodes scapularis/Ixodes scapularis			IPR001478;noIPR;noIPR;IPR000159;noIPR;IPR001683;IPR036871;IPR037831;noIPR;IPR000159;IPR001683;IPR001478;noIPR;IPR037833;IPR037827;IPR036871;IPR029071;IPR036034
TRINITY_DN100213_c5_g1_i3	phosphatase/kinase domain-containing protein, putative	5510	1	1.7E-268	92.28%	gi|241688878|ref|XP_002411731.1|phosphatase/kinase domain-containing protein, putative [Ixodes scapularis]/gi|215504551|gb|EEC14045.1| phosphatase/kinase domain-containing protein, putative [Ixodes scapularis]	Ixodes scapularis/Ixodes scapularis			IPR001478;noIPR;noIPR;IPR000159;IPR001683;noIPR;IPR036871;IPR037831;noIPR;IPR000159;IPR001683;IPR001478;noIPR;IPR037833;IPR037827;IPR036871;IPR029071;IPR036034
TRINITY_DN100213_c5_g1_i5	phosphatase/kinase domain-containing protein, putative	7716	1	2.4E-268	92.28%	gi|241688878|ref|XP_002411731.1|phosphatase/kinase domain-containing protein, putative [Ixodes scapularis]/gi|215504551|gb|EEC14045.1| phosphatase/kinase domain-containing protein, putative [Ixodes scapularis]	Ixodes scapularis/Ixodes scapularis			IPR001478;noIPR;noIPR;IPR000159;noIPR;IPR001683;IPR036871;IPR037831;noIPR;IPR000159;IPR001683;IPR001478;noIPR;IPR037833;IPR037827;IPR036871;IPR029071;IPR036034
TRINITY_DN100213_c5_g1_i6	phosphatase/kinase domain-containing protein, putative	7736	1	2.4E-268	92.28%	gi|241688878|ref|XP_002411731.1|phosphatase/kinase domain-containing protein, putative [Ixodes scapularis]/gi|215504551|gb|EEC14045.1| phosphatase/kinase domain-containing protein, putative [Ixodes scapularis]	Ixodes scapularis/Ixodes scapularis			IPR001478;noIPR;noIPR;IPR000159;noIPR;IPR001683;IPR036871;IPR037831;noIPR;IPR000159;IPR001683;IPR001478;noIPR;IPR037833;IPR037827;IPR036871;IPR029071;IPR036034
TRINITY_DN100213_c5_g1_i7	phosphatase/kinase domain-containing protein, putative	7744	1	2.4E-268	92.28%	gi|241688878|ref|XP_002411731.1|phosphatase/kinase domain-containing protein, putative [Ixodes scapularis]/gi|215504551|gb|EEC14045.1| phosphatase/kinase domain-containing protein, putative [Ixodes scapularis]	Ixodes scapularis/Ixodes scapularis			IPR001478;noIPR;noIPR;IPR000159;IPR001683;noIPR;IPR036871;IPR037831;noIPR;IPR000159;IPR001683;IPR001478;noIPR;IPR037833;IPR037827;IPR036871;IPR029071;IPR036034
TRINITY_DN100213_c5_g1_i8	phosphatase/kinase domain-containing protein, putative	3461	1	5.5E-55	90.43%	gi|241688878|ref|XP_002411731.1|phosphatase/kinase domain-containing protein, putative [Ixodes scapularis]/gi|215504551|gb|EEC14045.1| phosphatase/kinase domain-containing protein, putative [Ixodes scapularis]	Ixodes scapularis/Ixodes scapularis			IPR040842;IPR037831;noIPR;IPR037827
TRINITY_DN100215_c3_g1_i1	cuticular protein, putative	1763	1	1.4E-35	95.06%	gi|242000782|ref|XP_002435034.1|cuticular protein, putative [Ixodes scapularis]/gi|215498364|gb|EEC07858.1| cuticular protein, putative [Ixodes scapularis]	Ixodes scapularis/Ixodes scapularis			noIPR;noIPR
TRINITY_DN100215_c3_g1_i2	cuticular protein, putative	3528	1	2.9E-35	95.06%	gi|242000782|ref|XP_002435034.1|cuticular protein, putative [Ixodes scapularis]/gi|215498364|gb|EEC07858.1| cuticular protein, putative [Ixodes scapularis]	Ixodes scapularis/Ixodes scapularis
TRINITY_DN100215_c3_g1_i3	cuticular protein, putative	910	1	7.4E-36	95.06%	gi|242000782|ref|XP_002435034.1|cuticular protein, putative [Ixodes scapularis]/gi|215498364|gb|EEC07858.1| cuticular protein, putative [Ixodes scapularis]	Ixodes scapularis/Ixodes scapularis			noIPR;noIPR
TRINITY_DN100215_c3_g1_i4	cuticular protein, putative	947	1	7.7E-36	95.06%	gi|242000782|ref|XP_002435034.1|cuticular protein, putative [Ixodes scapularis]/gi|215498364|gb|EEC07858.1| cuticular protein, putative [Ixodes scapularis]	Ixodes scapularis/Ixodes scapularis			noIPR;noIPR
TRINITY_DN100216_c2_g1_i1	probable chitinase 10	2626	1	4.3E-76	56.25%	gi|926634994|ref|XP_013783368.1|probable chitinase 10 [Limulus polyphemus]	Limulus polyphemus			IPR029070;IPR001223;noIPR;noIPR;noIPR;noIPR;noIPR;noIPR;noIPR;noIPR;noIPR;noIPR;IPR029070;IPR017853
TRINITY_DN100216_c2_g1_i2	probable chitinase 10	1274	1	1.3E-57	55.42%	gi|926634994|ref|XP_013783368.1|probable chitinase 10 [Limulus polyphemus]	Limulus polyphemus			noIPR;IPR029070;IPR001223;noIPR;noIPR;IPR029070;IPR017853
TRINITY_DN100216_c2_g1_i4	probable chitinase 10	1785	1	2.9E-76	56.25%	gi|926634994|ref|XP_013783368.1|probable chitinase 10 [Limulus polyphemus]	Limulus polyphemus			noIPR;IPR001223;IPR029070;noIPR;noIPR;noIPR;noIPR;noIPR;IPR017853;IPR029070
TRINITY_DN100216_c2_g1_i5	hypothetical protein IscW_ISCW024449	575	1	1.2E-23	74.71%	gi|241650525|ref|XP_002410242.1|hypothetical protein IscW_ISCW024449 [Ixodes scapularis]/gi|215501561|gb|EEC11055.1| hypothetical protein IscW_ISCW024449, partial [Ixodes scapularis]	Ixodes scapularis/Ixodes scapularis			noIPR;noIPR;noIPR;IPR017853
TRINITY_DN100216_c2_g1_i7	probable chitinase 10	1360	1	7.9E-58	55.42%	gi|926634994|ref|XP_013783368.1|probable chitinase 10 [Limulus polyphemus]	Limulus polyphemus			noIPR;IPR001223;IPR029070;noIPR;noIPR;IPR029070;IPR017853
TRINITY_DN100216_c2_g1_i8	hypothetical protein IscW_ISCW024449	578	1	2.7E-23	74.71%	gi|241650525|ref|XP_002410242.1|hypothetical protein IscW_ISCW024449 [Ixodes scapularis]/gi|215501561|gb|EEC11055.1| hypothetical protein IscW_ISCW024449, partial [Ixodes scapularis]	Ixodes scapularis/Ixodes scapularis			noIPR;noIPR;noIPR;IPR017853
TRINITY_DN100217_c2_g1_i1	Dual specificity mitogen-activated protein kinase kinase 4	7669	1	1.7E-221	100.00%	gi|696122836|gb|AIT40209.1|Dual specificity mitogen-activated protein kinase kinase 4 [Rhipicephalus microplus]	Rhipicephalus microplus			noIPR;IPR000719;noIPR;noIPR;noIPR;noIPR;noIPR;IPR000719;noIPR;IPR011009
TRINITY_DN100217_c2_g1_i3	Dual specificity mitogen-activated protein kinase kinase 4	7395	1	1.6E-221	100.00%	gi|696122836|gb|AIT40209.1|Dual specificity mitogen-activated protein kinase kinase 4 [Rhipicephalus microplus]	Rhipicephalus microplus			noIPR;noIPR;IPR000719;noIPR;noIPR;noIPR;noIPR;IPR000719;noIPR;IPR011009
TRINITY_DN100217_c2_g1_i4	Dual specificity mitogen-activated protein kinase kinase 4	5271	1	1.1E-221	100.00%	gi|696122836|gb|AIT40209.1|Dual specificity mitogen-activated protein kinase kinase 4 [Rhipicephalus microplus]	Rhipicephalus microplus			noIPR;IPR000719;noIPR;noIPR;noIPR;noIPR;noIPR;IPR000719;noIPR;IPR011009
TRINITY_DN100217_c2_g1_i6	Dual specificity mitogen-activated protein kinase kinase 4	7648	1	1.7E-221	100.00%	gi|696122836|gb|AIT40209.1|Dual specificity mitogen-activated protein kinase kinase 4 [Rhipicephalus microplus]	Rhipicephalus microplus			noIPR;IPR000719;noIPR;noIPR;noIPR;noIPR;noIPR;IPR000719;noIPR;IPR011009
TRINITY_DN100219_c1_g2_i4	conserved hypothetical protein	1542	1	7.1E-39	61.21%	gi|241836830|ref|XP_002415136.1|conserved hypothetical protein [Ixodes scapularis]/gi|215509348|gb|EEC18801.1| conserved hypothetical protein [Ixodes scapularis]	Ixodes scapularis/Ixodes scapularis			noIPR;noIPR;noIPR;IPR028745
TRINITY_DN100219_c1_g2_i7	conserved hypothetical protein	4044	1	4.2E-115	63.10%	gi|241836830|ref|XP_002415136.1|conserved hypothetical protein [Ixodes scapularis]/gi|215509348|gb|EEC18801.1| conserved hypothetical protein [Ixodes scapularis]	Ixodes scapularis/Ixodes scapularis			noIPR;noIPR;noIPR;noIPR;noIPR;IPR028745
TRINITY_DN100221_c2_g1_i1	ankyrin repeat and BTB/POZ domain-containing protein 2-like	5563	1	0.0E0	71.07%	gi|1238837401|ref|XP_022237815.1|ankyrin repeat and BTB/POZ domain-containing protein 2-like [Limulus polyphemus]/gi|1238837403|ref|XP_022237816.1| ankyrin repeat and BTB/POZ domain-containing protein 2-like [Limulus polyphemus]	Limulus polyphemus/Limulus polyphemus			IPR036770;IPR020683;IPR000210;noIPR;IPR009072;noIPR;noIPR;noIPR;noIPR;noIPR;noIPR;noIPR;noIPR;noIPR;IPR000210;IPR020683;IPR002110;IPR002110;IPR002110;IPR020683;noIPR;IPR009072;IPR011333;IPR036770
TRINITY_DN100221_c2_g1_i3	ankyrin repeat and BTB/POZ domain-containing protein 2-like	5561	1	0.0E0	71.07%	gi|1238837401|ref|XP_022237815.1|ankyrin repeat and BTB/POZ domain-containing protein 2-like [Limulus polyphemus]/gi|1238837403|ref|XP_022237816.1| ankyrin repeat and BTB/POZ domain-containing protein 2-like [Limulus polyphemus]	Limulus polyphemus/Limulus polyphemus			IPR020683;IPR036770;IPR009072;IPR000210;noIPR;noIPR;noIPR;noIPR;noIPR;noIPR;noIPR;noIPR;noIPR;noIPR;IPR020683;IPR002110;IPR002110;IPR002110;IPR000210;IPR020683;noIPR;IPR036770;IPR011333;IPR009072
TRINITY_DN100223_c2_g1_i1	protein transport protein Sec23A-like isoform X1	4550	1	0.0E0	89.58%	gi|926632548|ref|XP_013782045.1|protein transport protein Sec23A-like isoform X1 [Limulus polyphemus]/gi|926632550|ref|XP_013782046.1| protein transport protein Sec23A-like isoform X1 [Limulus polyphemus]	Limulus polyphemus/Limulus polyphemus			noIPR;IPR006895;IPR007123;IPR012990;noIPR;IPR006900;noIPR;IPR029006;IPR006896;IPR036465;noIPR;noIPR;noIPR;IPR037364;noIPR;IPR037550;IPR036175;IPR036180;noIPR;IPR036174;IPR036465
TRINITY_DN100223_c2_g1_i2	protein transport protein Sec23A-like isoform X1	5682	1	0.0E0	89.58%	gi|926632548|ref|XP_013782045.1|protein transport protein Sec23A-like isoform X1 [Limulus polyphemus]/gi|926632550|ref|XP_013782046.1| protein transport protein Sec23A-like isoform X1 [Limulus polyphemus]	Limulus polyphemus/Limulus polyphemus			noIPR;IPR006895;IPR007123;IPR012990;noIPR;IPR006900;noIPR;IPR029006;IPR006896;IPR036465;noIPR;noIPR;noIPR;IPR037364;noIPR;IPR037550;IPR036175;IPR036180;noIPR;IPR036174;IPR036465
TRINITY_DN100224_c1_g1_i1	Transmembrane protein 132C	6814	1	8.4E-217	56.94%	gi|675372799|gb|KFM65701.1|Transmembrane protein 132C, partial [Stegodyphus mimosarum]	Stegodyphus mimosarum			IPR031437;IPR031436;noIPR;noIPR;IPR026307
TRINITY_DN100225_c1_g1_i11	hypothetical protein IscW_ISCW021605	3329	1	9.5E-89	66.05%	gi|241742621|ref|XP_002412403.1|hypothetical protein IscW_ISCW021605 [Ixodes scapularis]/gi|215505729|gb|EEC15223.1| hypothetical protein IscW_ISCW021605 [Ixodes scapularis]	Ixodes scapularis/Ixodes scapularis			IPR001849;IPR011993;noIPR;noIPR;noIPR;noIPR;noIPR;noIPR;IPR001849;noIPR;noIPR
TRINITY_DN100225_c1_g1_i12	hypothetical protein IscW_ISCW021605	3335	1	9.5E-89	66.05%	gi|241742621|ref|XP_002412403.1|hypothetical protein IscW_ISCW021605 [Ixodes scapularis]/gi|215505729|gb|EEC15223.1| hypothetical protein IscW_ISCW021605 [Ixodes scapularis]	Ixodes scapularis/Ixodes scapularis			IPR001849;IPR011993;noIPR;noIPR;noIPR;noIPR;noIPR;noIPR;IPR001849;noIPR;noIPR
TRINITY_DN100225_c1_g1_i13	hypothetical protein IscW_ISCW021605	3338	1	1.6E-88	66.85%	gi|241742621|ref|XP_002412403.1|hypothetical protein IscW_ISCW021605 [Ixodes scapularis]/gi|215505729|gb|EEC15223.1| hypothetical protein IscW_ISCW021605 [Ixodes scapularis]	Ixodes scapularis/Ixodes scapularis			IPR011993;IPR001849;noIPR;noIPR;noIPR;noIPR;noIPR;IPR001849;noIPR;noIPR
TRINITY_DN100225_c1_g1_i14	hypothetical protein IscW_ISCW021605	3335	1	1.2E-88	66.85%	gi|241742621|ref|XP_002412403.1|hypothetical protein IscW_ISCW021605 [Ixodes scapularis]/gi|215505729|gb|EEC15223.1| hypothetical protein IscW_ISCW021605 [Ixodes scapularis]	Ixodes scapularis/Ixodes scapularis			IPR001849;IPR011993;noIPR;noIPR;noIPR;noIPR;noIPR;noIPR;IPR001849;noIPR;noIPR
TRINITY_DN100225_c1_g1_i2	hypothetical protein IscW_ISCW021605	3332	1	1.2E-88	66.05%	gi|241742621|ref|XP_002412403.1|hypothetical protein IscW_ISCW021605 [Ixodes scapularis]/gi|215505729|gb|EEC15223.1| hypothetical protein IscW_ISCW021605 [Ixodes scapularis]	Ixodes scapularis/Ixodes scapularis			IPR001849;IPR011993;noIPR;noIPR;noIPR;noIPR;noIPR;IPR001849;noIPR;noIPR
TRINITY_DN100225_c1_g1_i7	hypothetical protein IscW_ISCW021605	3332	1	3.3E-89	66.85%	gi|241742621|ref|XP_002412403.1|hypothetical protein IscW_ISCW021605 [Ixodes scapularis]/gi|215505729|gb|EEC15223.1| hypothetical protein IscW_ISCW021605 [Ixodes scapularis]	Ixodes scapularis/Ixodes scapularis			IPR011993;IPR001849;noIPR;noIPR;noIPR;noIPR;noIPR;noIPR;IPR001849;noIPR;noIPR
TRINITY_DN100225_c1_g1_i9	hypothetical protein IscW_ISCW021605	3331	1	3.3E-89	66.05%	gi|241742621|ref|XP_002412403.1|hypothetical protein IscW_ISCW021605 [Ixodes scapularis]/gi|215505729|gb|EEC15223.1| hypothetical protein IscW_ISCW021605 [Ixodes scapularis]	Ixodes scapularis/Ixodes scapularis			IPR001849;IPR011993;noIPR;noIPR;noIPR;noIPR;noIPR;noIPR;IPR001849;noIPR;noIPR
TRINITY_DN100226_c1_g2_i1	peroxidase, putative	4719	1	0.0E0	79.06%	gi|241709529|ref|XP_002413386.1|peroxidase, putative [Ixodes scapularis]/gi|215507200|gb|EEC16694.1| peroxidase, putative [Ixodes scapularis]	Ixodes scapularis/Ixodes scapularis	EC:1.11.1.7	Peroxidase	IPR019791;IPR037120;IPR019791;IPR013098;IPR001611;IPR013783;IPR013783;IPR013783;IPR032675;IPR032675;noIPR;noIPR;noIPR;IPR034828;noIPR;noIPR;IPR001611;IPR007110;IPR001611;IPR007110;IPR019791;IPR007110;IPR007110;IPR001611;IPR001611;IPR001611;IPR001611;noIPR;IPR034824;IPR010255;IPR036179;IPR036179;IPR036179;IPR036179;noIPR
TRINITY_DN100226_c1_g2_i2	peroxidase, putative	4819	1	0.0E0	79.06%	gi|241709529|ref|XP_002413386.1|peroxidase, putative [Ixodes scapularis]/gi|215507200|gb|EEC16694.1| peroxidase, putative [Ixodes scapularis]	Ixodes scapularis/Ixodes scapularis	EC:1.11.1.7	Peroxidase	IPR019791;IPR032675;IPR013783;IPR013783;IPR013098;IPR013783;IPR019791;IPR037120;noIPR;noIPR;noIPR;IPR034828;noIPR;IPR007110;IPR007110;IPR019791;IPR007110;IPR007110;IPR034824;noIPR;IPR036179;IPR036179;IPR010255;IPR036179;noIPR;IPR036179
TRINITY_DN100228_c4_g2_i2	lysine-ketoglutarate reductase/saccharopine dehydrogenase	518	1	3.1E-63	95.38%	gi|260590586|dbj|BAI44335.1|lysine-ketoglutarate reductase/saccharopine dehydrogenase [Haemaphysalis longicornis]	Haemaphysalis longicornis			noIPR;IPR032095;noIPR;noIPR;noIPR
TRINITY_DN100228_c4_g2_i4	lysine-ketoglutarate reductase/saccharopine dehydrogenase	2592	1	0.0E0	96.48%	gi|260590586|dbj|BAI44335.1|lysine-ketoglutarate reductase/saccharopine dehydrogenase [Haemaphysalis longicornis]	Haemaphysalis longicornis			IPR032095;noIPR;IPR007698;noIPR;IPR005097;IPR007886;noIPR;noIPR;noIPR;noIPR;IPR036291;noIPR;noIPR
TRINITY_DN100228_c4_g2_i5	lysine-ketoglutarate reductase/saccharopine dehydrogenase	3109	1	0.0E0	96.26%	gi|260590586|dbj|BAI44335.1|lysine-ketoglutarate reductase/saccharopine dehydrogenase [Haemaphysalis longicornis]	Haemaphysalis longicornis			IPR007698;IPR007886;noIPR;noIPR;noIPR;noIPR;IPR005097;IPR032095;noIPR;noIPR;noIPR;noIPR;noIPR;IPR036291
TRINITY_DN100229_c1_g1_i1	uncharacterized protein LOC111029812	514	1	3.6E-11	60.67%	gi|1229888691|ref|XP_022164687.1|uncharacterized protein LOC111029812 [Myzus persicae]/gi|1229906587|ref|XP_022174201.1| uncharacterized protein LOC111036482 [Myzus persicae]/gi|1230075499|ref|XP_022177296.1| uncharacterized protein LOC111038479 [Myzus persicae]/gi|1230152012|ref|XP_022178467.1| uncharacterized protein LOC111039312 [Myzus persicae]	Myzus persicae/Myzus persicae/Myzus persicae/Myzus persicae			IPR007527
TRINITY_DN100229_c1_g1_i5	PREDICTED: ankyrin-2-like	587	1	1.8E-11	64.20%	gi|939665840|ref|XP_014297809.1|PREDICTED: ankyrin-2-like [Microplitis demolitor]	Microplitis demolitor			IPR007527
TRINITY_DN100229_c1_g1_i7	PREDICTED: ankyrin-2-like	571	1	4.0E-11	61.90%	gi|939665840|ref|XP_014297809.1|PREDICTED: ankyrin-2-like [Microplitis demolitor]	Microplitis demolitor			IPR007527
TRINITY_DN100229_c2_g1_i10	uncharacterized protein LOC111693546	754	1	2.8E-20	56.62%	gi|1321331640|ref|XP_023314116.1|uncharacterized protein LOC111693546 [Trichogramma pretiosum]/gi|1321356336|ref|XP_023318629.1| uncharacterized protein LOC111694471 [Trichogramma pretiosum]	Trichogramma pretiosum/Trichogramma pretiosum
TRINITY_DN100229_c2_g1_i11	hypothetical protein X975_16881, partial	1453	1	5.3E-20	56.64%	gi|675375100|gb|KFM68002.1|hypothetical protein X975_16881, partial [Stegodyphus mimosarum]	Stegodyphus mimosarum			IPR019080;IPR011604;noIPR;noIPR;IPR011335
TRINITY_DN100229_c2_g1_i12	uncharacterized protein LOC111622859	1332	1	1.4E-30	53.81%	gi|1316151768|ref|XP_023221063.1|uncharacterized protein LOC111622859 [Centruroides sculpturatus]/gi|1316151770|ref|XP_023221064.1| uncharacterized protein LOC111622859 [Centruroides sculpturatus]/gi|1316163031|ref|XP_023226783.1| uncharacterized protein LOC111627448 [Centruroides sculpturatus]	Centruroides sculpturatus/Centruroides sculpturatus/Centruroides sculpturatus			IPR011604;IPR019080;noIPR;noIPR;IPR011335
TRINITY_DN100229_c2_g1_i2	uncharacterized protein LOC111622859	1138	1	1.2E-30	53.81%	gi|1316151768|ref|XP_023221063.1|uncharacterized protein LOC111622859 [Centruroides sculpturatus]/gi|1316151770|ref|XP_023221064.1| uncharacterized protein LOC111622859 [Centruroides sculpturatus]/gi|1316163031|ref|XP_023226783.1| uncharacterized protein LOC111627448 [Centruroides sculpturatus]	Centruroides sculpturatus/Centruroides sculpturatus/Centruroides sculpturatus			IPR011604;IPR019080;noIPR;noIPR;IPR011335
TRINITY_DN100229_c2_g1_i6	uncharacterized protein LOC111622859	1456	1	4.0E-31	53.85%	gi|1316151768|ref|XP_023221063.1|uncharacterized protein LOC111622859 [Centruroides sculpturatus]/gi|1316151770|ref|XP_023221064.1| uncharacterized protein LOC111622859 [Centruroides sculpturatus]/gi|1316163031|ref|XP_023226783.1| uncharacterized protein LOC111627448 [Centruroides sculpturatus]	Centruroides sculpturatus/Centruroides sculpturatus/Centruroides sculpturatus
TRINITY_DN100229_c2_g1_i9	hypothetical protein X975_16881, partial	772	1	1.9E-24	54.34%	gi|675375100|gb|KFM68002.1|hypothetical protein X975_16881, partial [Stegodyphus mimosarum]	Stegodyphus mimosarum			IPR011604;IPR019080;noIPR;noIPR;IPR011335
TRINITY_DN100230_c3_g1_i11	lectin, putative	2287	1	7.5E-170	92.54%	gi|241751033|ref|XP_002400938.1|lectin, putative [Ixodes scapularis]/gi|215508257|gb|EEC17711.1| lectin, putative [Ixodes scapularis]	Ixodes scapularis/Ixodes scapularis			noIPR;IPR005052;noIPR;noIPR;IPR005052;IPR035664;IPR013320
TRINITY_DN100230_c3_g1_i12	lectin, putative	2117	1	7.0E-170	92.54%	gi|241751033|ref|XP_002400938.1|lectin, putative [Ixodes scapularis]/gi|215508257|gb|EEC17711.1| lectin, putative [Ixodes scapularis]	Ixodes scapularis/Ixodes scapularis			noIPR;IPR005052;noIPR;noIPR;IPR005052;IPR035664;IPR013320
TRINITY_DN100230_c3_g1_i13	lectin, putative	2000	1	6.6E-170	92.54%	gi|241751033|ref|XP_002400938.1|lectin, putative [Ixodes scapularis]/gi|215508257|gb|EEC17711.1| lectin, putative [Ixodes scapularis]	Ixodes scapularis/Ixodes scapularis			noIPR;IPR005052;noIPR;noIPR;IPR005052;IPR035664;IPR013320
TRINITY_DN100230_c3_g1_i14	lectin, putative	2231	1	7.4E-170	92.54%	gi|241751033|ref|XP_002400938.1|lectin, putative [Ixodes scapularis]/gi|215508257|gb|EEC17711.1| lectin, putative [Ixodes scapularis]	Ixodes scapularis/Ixodes scapularis			noIPR;IPR005052;noIPR;noIPR;IPR005052;IPR035664;IPR013320
TRINITY_DN100230_c3_g1_i15	lectin, putative	878	1	8.9E-79	82.11%	gi|241751033|ref|XP_002400938.1|lectin, putative [Ixodes scapularis]/gi|215508257|gb|EEC17711.1| lectin, putative [Ixodes scapularis]	Ixodes scapularis/Ixodes scapularis			noIPR;IPR005052;noIPR;noIPR;IPR005052;IPR013320
TRINITY_DN100230_c3_g1_i16	lectin, putative	1385	1	1.5E-104	93.78%	gi|241751033|ref|XP_002400938.1|lectin, putative [Ixodes scapularis]/gi|215508257|gb|EEC17711.1| lectin, putative [Ixodes scapularis]	Ixodes scapularis/Ixodes scapularis			IPR005052;noIPR;noIPR;noIPR;IPR005052;IPR013320
TRINITY_DN100230_c3_g1_i17	lectin, putative	1495	1	5.7E-126	86.94%	gi|241751033|ref|XP_002400938.1|lectin, putative [Ixodes scapularis]/gi|215508257|gb|EEC17711.1| lectin, putative [Ixodes scapularis]	Ixodes scapularis/Ixodes scapularis			IPR005052;noIPR;noIPR;noIPR;IPR005052;IPR013320
TRINITY_DN100230_c3_g1_i19	lectin, putative	2224	1	7.3E-170	92.54%	gi|241751033|ref|XP_002400938.1|lectin, putative [Ixodes scapularis]/gi|215508257|gb|EEC17711.1| lectin, putative [Ixodes scapularis]	Ixodes scapularis/Ixodes scapularis			noIPR;IPR005052;noIPR;noIPR;IPR005052;IPR035664;IPR013320
TRINITY_DN100230_c3_g1_i2	lectin, putative	2404	1	7.9E-170	92.54%	gi|241751033|ref|XP_002400938.1|lectin, putative [Ixodes scapularis]/gi|215508257|gb|EEC17711.1| lectin, putative [Ixodes scapularis]	Ixodes scapularis/Ixodes scapularis			noIPR;IPR005052;noIPR;noIPR;IPR005052;IPR035664;IPR013320
TRINITY_DN100230_c3_g1_i20	lectin, putative	2231	1	7.4E-170	92.54%	gi|241751033|ref|XP_002400938.1|lectin, putative [Ixodes scapularis]/gi|215508257|gb|EEC17711.1| lectin, putative [Ixodes scapularis]	Ixodes scapularis/Ixodes scapularis			noIPR;IPR005052;noIPR;noIPR;IPR005052;IPR035664;IPR013320
TRINITY_DN100230_c3_g1_i21	lectin, putative	2175	1	7.2E-170	92.54%	gi|241751033|ref|XP_002400938.1|lectin, putative [Ixodes scapularis]/gi|215508257|gb|EEC17711.1| lectin, putative [Ixodes scapularis]	Ixodes scapularis/Ixodes scapularis			noIPR;IPR005052;noIPR;noIPR;IPR005052;IPR035664;IPR013320
TRINITY_DN100230_c3_g1_i4	lectin, putative	2147	1	7.1E-170	92.54%	gi|241751033|ref|XP_002400938.1|lectin, putative [Ixodes scapularis]/gi|215508257|gb|EEC17711.1| lectin, putative [Ixodes scapularis]	Ixodes scapularis/Ixodes scapularis			noIPR;IPR005052;noIPR;noIPR;IPR005052;IPR035664;IPR013320
TRINITY_DN100230_c3_g1_i5	lectin, putative	1944	1	6.4E-170	92.54%	gi|241751033|ref|XP_002400938.1|lectin, putative [Ixodes scapularis]/gi|215508257|gb|EEC17711.1| lectin, putative [Ixodes scapularis]	Ixodes scapularis/Ixodes scapularis			noIPR;IPR005052;noIPR;noIPR;IPR005052;IPR035664;IPR013320
TRINITY_DN100230_c3_g1_i6	lectin, putative	1995	1	6.6E-170	92.54%	gi|241751033|ref|XP_002400938.1|lectin, putative [Ixodes scapularis]/gi|215508257|gb|EEC17711.1| lectin, putative [Ixodes scapularis]	Ixodes scapularis/Ixodes scapularis			noIPR;IPR005052;noIPR;noIPR;IPR005052;IPR035664;IPR013320
TRINITY_DN100230_c3_g1_i7	lectin, putative	2051	1	6.8E-170	92.54%	gi|241751033|ref|XP_002400938.1|lectin, putative [Ixodes scapularis]/gi|215508257|gb|EEC17711.1| lectin, putative [Ixodes scapularis]	Ixodes scapularis/Ixodes scapularis			noIPR;IPR005052;noIPR;noIPR;IPR005052;IPR035664;IPR013320
TRINITY_DN100230_c3_g1_i8	lectin, putative	929	1	6.3E-83	97.50%	gi|241751033|ref|XP_002400938.1|lectin, putative [Ixodes scapularis]/gi|215508257|gb|EEC17711.1| lectin, putative [Ixodes scapularis]	Ixodes scapularis/Ixodes scapularis			IPR005052;noIPR;noIPR;noIPR;IPR005052;IPR013320
TRINITY_DN100230_c3_g1_i9	lectin, putative	1546	1	3.9E-130	97.90%	gi|241751033|ref|XP_002400938.1|lectin, putative [Ixodes scapularis]/gi|215508257|gb|EEC17711.1| lectin, putative [Ixodes scapularis]	Ixodes scapularis/Ixodes scapularis			IPR005052;noIPR;noIPR;noIPR;IPR005052;IPR035664;IPR013320
TRINITY_DN100231_c4_g1_i2	lysM and putative peptidoglycan-binding domain-containing protein 2 isoform X1	4780	1	2.7E-20	54.26%	gi|1339089865|ref|XP_023706077.1|lysM and putative peptidoglycan-binding domain-containing protein 2 isoform X1 [Cryptotermes secundus]/gi|1330917895|gb|PNF35159.1| hypothetical protein B7P43_G08772 [Cryptotermes secundus]	Cryptotermes secundus/Cryptotermes secundus			IPR036779;IPR018392;noIPR;noIPR;noIPR;noIPR;IPR018392;IPR018392;noIPR
TRINITY_DN100231_c4_g1_i4	conserved hypothetical protein	4235	1	7.2E-17	53.74%	gi|241613196|ref|XP_002407354.1|conserved hypothetical protein [Ixodes scapularis]/gi|215502778|gb|EEC12272.1| conserved hypothetical protein [Ixodes scapularis]	Ixodes scapularis/Ixodes scapularis			noIPR;noIPR
TRINITY_DN100232_c3_g1_i1	hypothetical protein BIW11_06052	1217	1	6.5E-19	90.14%	gi|1173920489|gb|OQR78974.1|hypothetical protein BIW11_06052 [Tropilaelaps mercedesae]	Tropilaelaps mercedesae			IPR022735;IPR029944;IPR022735
TRINITY_DN100232_c3_g1_i7	EH domain-binding protein 1	2073	1	9.3E-26	89.13%	gi|1078797247|ref|XP_003737611.2|PREDICTED: EH domain-binding protein 1 [Galendromus occidentalis]	Galendromus occidentalis			IPR022735;noIPR;noIPR;noIPR;noIPR;noIPR;IPR029944;IPR022735
TRINITY_DN100233_c1_g1_i2	serine/threonine-protein phosphatase 6 regulatory ankyrin repeat subunit C-like isoform X2	4292	1	1.2E-264	66.24%	gi|1253686295|ref|XP_022646610.1|serine/threonine-protein phosphatase 6 regulatory ankyrin repeat subunit C-like isoform X2 [Varroa destructor]	Varroa destructor			IPR036770;IPR036770;IPR020683;IPR036770;IPR036770;IPR036770;noIPR;noIPR;noIPR;noIPR;noIPR;noIPR;noIPR;noIPR;noIPR;noIPR;noIPR;IPR002110;IPR002110;IPR002110;IPR002110;IPR002110;IPR020683;IPR002110;IPR002110;IPR002110;IPR020683;IPR020683;IPR020683;IPR020683;IPR020683;IPR036770;IPR036770
TRINITY_DN100233_c1_g1_i3	serine/threonine-protein phosphatase 6 regulatory ankyrin repeat subunit C-like isoform X2	3845	1	1.0E-264	66.24%	gi|1253686295|ref|XP_022646610.1|serine/threonine-protein phosphatase 6 regulatory ankyrin repeat subunit C-like isoform X2 [Varroa destructor]	Varroa destructor			IPR036770;IPR036770;IPR020683;IPR036770;IPR036770;IPR036770;noIPR;noIPR;noIPR;noIPR;noIPR;noIPR;noIPR;noIPR;noIPR;noIPR;noIPR;IPR002110;IPR002110;IPR002110;IPR002110;IPR002110;IPR020683;IPR002110;IPR002110;IPR002110;IPR020683;IPR020683;IPR020683;IPR020683;IPR020683;IPR036770;IPR036770
TRINITY_DN100233_c1_g1_i4	serine/threonine-protein phosphatase 6 regulatory ankyrin repeat subunit B-like	701	1	8.2E-75	83.33%	gi|1316141073|ref|XP_023215490.1|serine/threonine-protein phosphatase 6 regulatory ankyrin repeat subunit B-like [Centruroides sculpturatus]	Centruroides sculpturatus			IPR020683;IPR036770;noIPR;noIPR;noIPR;IPR002110;IPR002110;IPR020683;IPR020683;IPR036770
TRINITY_DN100234_c3_g1_i1	lysophosphatidic acid acyltransferase endophilin, putative	2146	1	1.3E-160	86.26%	gi|241610174|ref|XP_002406889.1|lysophosphatidic acid acyltransferase endophilin, putative [Ixodes scapularis]/gi|215502732|gb|EEC12226.1| lysophosphatidic acid acyltransferase endophilin, putative [Ixodes scapularis]	Ixodes scapularis/Ixodes scapularis			IPR001452;noIPR;IPR027267;IPR004148;IPR001452;noIPR;IPR028501;IPR004148;IPR001452;IPR035824;noIPR;IPR036028;IPR027267
TRINITY_DN100234_c3_g1_i2	lysophosphatidic acid acyltransferase endophilin, putative	2191	1	4.4E-159	82.85%	gi|241610174|ref|XP_002406889.1|lysophosphatidic acid acyltransferase endophilin, putative [Ixodes scapularis]/gi|215502732|gb|EEC12226.1| lysophosphatidic acid acyltransferase endophilin, putative [Ixodes scapularis]	Ixodes scapularis/Ixodes scapularis			noIPR;IPR001452;IPR004148;noIPR;IPR027267;IPR001452;IPR028501;IPR004148;IPR001452;IPR035824;noIPR;IPR036028;IPR027267
TRINITY_DN100234_c3_g1_i3	lysophosphatidic acid acyltransferase endophilin, putative	2139	1	1.3E-160	86.26%	gi|241610174|ref|XP_002406889.1|lysophosphatidic acid acyltransferase endophilin, putative [Ixodes scapularis]/gi|215502732|gb|EEC12226.1| lysophosphatidic acid acyltransferase endophilin, putative [Ixodes scapularis]	Ixodes scapularis/Ixodes scapularis			IPR001452;noIPR;IPR027267;IPR004148;IPR001452;noIPR;IPR028501;IPR004148;IPR001452;IPR035824;noIPR;IPR036028;IPR027267
TRINITY_DN100234_c3_g1_i4	lysophosphatidic acid acyltransferase endophilin, putative	2335	1	1.5E-160	86.26%	gi|241610174|ref|XP_002406889.1|lysophosphatidic acid acyltransferase endophilin, putative [Ixodes scapularis]/gi|215502732|gb|EEC12226.1| lysophosphatidic acid acyltransferase endophilin, putative [Ixodes scapularis]	Ixodes scapularis/Ixodes scapularis			IPR001452;noIPR;IPR027267;IPR004148;IPR001452;noIPR;IPR028501;IPR004148;IPR001452;IPR035824;noIPR;IPR036028;IPR027267
TRINITY_DN100234_c3_g1_i6	lysophosphatidic acid acyltransferase endophilin, putative	2184	1	4.4E-159	82.85%	gi|241610174|ref|XP_002406889.1|lysophosphatidic acid acyltransferase endophilin, putative [Ixodes scapularis]/gi|215502732|gb|EEC12226.1| lysophosphatidic acid acyltransferase endophilin, putative [Ixodes scapularis]	Ixodes scapularis/Ixodes scapularis			noIPR;IPR001452;IPR004148;noIPR;IPR027267;IPR001452;IPR028501;IPR004148;IPR001452;IPR035824;noIPR;IPR036028;IPR027267
TRINITY_DN100234_c3_g1_i7	lysophosphatidic acid acyltransferase endophilin, putative	1027	1	8.1E-23	96.49%	gi|241610174|ref|XP_002406889.1|lysophosphatidic acid acyltransferase endophilin, putative [Ixodes scapularis]/gi|215502732|gb|EEC12226.1| lysophosphatidic acid acyltransferase endophilin, putative [Ixodes scapularis]	Ixodes scapularis/Ixodes scapularis
TRINITY_DN100234_c3_g1_i8	lysophosphatidic acid acyltransferase endophilin, putative	2380	1	4.8E-159	82.85%	gi|241610174|ref|XP_002406889.1|lysophosphatidic acid acyltransferase endophilin, putative [Ixodes scapularis]/gi|215502732|gb|EEC12226.1| lysophosphatidic acid acyltransferase endophilin, putative [Ixodes scapularis]	Ixodes scapularis/Ixodes scapularis			noIPR;IPR001452;IPR004148;noIPR;IPR027267;IPR001452;IPR028501;IPR004148;IPR001452;IPR035824;noIPR;IPR036028;IPR027267
TRINITY_DN100235_c3_g1_i2	gag-pol polyprotein	1511	1	2.2E-40	53.53%	gi|392499323|gb|AFM75879.1|gag-pol polyprotein, partial [Eyprepocnemis plorans]	Eyprepocnemis plorans			noIPR;IPR021109;noIPR;noIPR;noIPR;noIPR;IPR021109;noIPR
TRINITY_DN100235_c3_g1_i3	gag-pol polyprotein	1174	1	8.1E-19	52.51%	gi|392499323|gb|AFM75879.1|gag-pol polyprotein, partial [Eyprepocnemis plorans]	Eyprepocnemis plorans			noIPR;IPR021109;noIPR;IPR021109
TRINITY_DN100236_c4_g1_i1	ubiquitin protein ligase, putative	1450	1	1.0E-71	92.05%	gi|241686123|ref|XP_002412813.1|ubiquitin protein ligase, putative [Ixodes scapularis]/gi|215506615|gb|EEC16109.1| ubiquitin protein ligase, putative, partial [Ixodes scapularis]	Ixodes scapularis/Ixodes scapularis			IPR016135;IPR000608;noIPR;noIPR;noIPR;noIPR;IPR000608;IPR000608;IPR016135
TRINITY_DN100236_c4_g1_i2	ubiquitin protein ligase, putative	2618	1	1.9E-71	91.45%	gi|241686123|ref|XP_002412813.1|ubiquitin protein ligase, putative [Ixodes scapularis]/gi|215506615|gb|EEC16109.1| ubiquitin protein ligase, putative, partial [Ixodes scapularis]	Ixodes scapularis/Ixodes scapularis			IPR016135;IPR000608;noIPR;noIPR;noIPR;noIPR;IPR000608;IPR000608;IPR016135
TRINITY_DN100236_c4_g1_i3	ubiquitin protein ligase, putative	2547	1	1.6E-88	91.94%	gi|241686123|ref|XP_002412813.1|ubiquitin protein ligase, putative [Ixodes scapularis]/gi|215506615|gb|EEC16109.1| ubiquitin protein ligase, putative, partial [Ixodes scapularis]	Ixodes scapularis/Ixodes scapularis			IPR016135;IPR000608;noIPR;noIPR;noIPR;noIPR;IPR000608;IPR000608;IPR016135
TRINITY_DN100236_c4_g2_i1	ubiquitin protein ligase, putative	563	1	3.3E-26	93.33%	gi|241686123|ref|XP_002412813.1|ubiquitin protein ligase, putative [Ixodes scapularis]/gi|215506615|gb|EEC16109.1| ubiquitin protein ligase, putative, partial [Ixodes scapularis]	Ixodes scapularis/Ixodes scapularis			IPR016135;noIPR;IPR016135
TRINITY_DN100237_c5_g1_i1	mitochondrial import receptor subunit TOM7 homolog	5493	1	2.4E-12	81.82%	gi|1317160044|ref|XP_023245027.1|mitochondrial import receptor subunit TOM7 homolog [Copidosoma floridanum]	Copidosoma floridanum
TRINITY_DN100238_c1_g1_i10	PREDICTED: myosin-IB	2859	1	1.0E-304	86.79%	gi|391334525|ref|XP_003741654.1|PREDICTED: myosin-IB [Galendromus occidentalis]	Galendromus occidentalis	EC:3.6.1.15	Nucleoside-triphosphate phosphatase	IPR001609;IPR001609;noIPR;noIPR;noIPR;IPR036961;noIPR;noIPR;noIPR;IPR001609;IPR036072;IPR027417
TRINITY_DN100238_c1_g1_i11	PREDICTED: myosin-IB	3390	1	0.0E0	84.17%	gi|391334525|ref|XP_003741654.1|PREDICTED: myosin-IB [Galendromus occidentalis]	Galendromus occidentalis	EC:3.6.1.15	Nucleoside-triphosphate phosphatase	IPR001609;noIPR;IPR036961;noIPR;IPR001609;noIPR;noIPR;noIPR;noIPR;noIPR;IPR001609;IPR000048;IPR036072;IPR027417
TRINITY_DN100238_c1_g1_i12	PREDICTED: myosin-IB	4211	1	0.0E0	81.35%	gi|391334525|ref|XP_003741654.1|PREDICTED: myosin-IB [Galendromus occidentalis]	Galendromus occidentalis	EC:3.6.1.15	Nucleoside-triphosphate phosphatase	IPR001609;IPR036961;IPR010926;noIPR;IPR001609;noIPR;noIPR;noIPR;noIPR;noIPR;noIPR;IPR010926;IPR001609;IPR000048;IPR036072;IPR027417
TRINITY_DN100238_c1_g1_i13	PREDICTED: myosin-IB	5488	1	0.0E0	81.35%	gi|391334525|ref|XP_003741654.1|PREDICTED: myosin-IB [Galendromus occidentalis]	Galendromus occidentalis	EC:3.6.1.15	Nucleoside-triphosphate phosphatase	IPR001609;IPR036961;IPR010926;noIPR;IPR001609;noIPR;noIPR;noIPR;noIPR;noIPR;noIPR;IPR010926;IPR001609;IPR000048;IPR036072;IPR027417
TRINITY_DN100238_c1_g1_i15	PREDICTED: myosin-IB	5792	1	0.0E0	81.35%	gi|391334525|ref|XP_003741654.1|PREDICTED: myosin-IB [Galendromus occidentalis]	Galendromus occidentalis	EC:3.6.1.15	Nucleoside-triphosphate phosphatase	IPR001609;IPR036961;IPR010926;noIPR;IPR001609;noIPR;noIPR;noIPR;noIPR;noIPR;noIPR;IPR010926;IPR001609;IPR000048;IPR036072;IPR027417
TRINITY_DN100238_c1_g1_i16	PREDICTED: myosin-IB	5494	1	0.0E0	81.35%	gi|391334525|ref|XP_003741654.1|PREDICTED: myosin-IB [Galendromus occidentalis]	Galendromus occidentalis	EC:3.6.1.15	Nucleoside-triphosphate phosphatase	IPR001609;IPR036961;IPR010926;noIPR;IPR001609;noIPR;noIPR;noIPR;noIPR;noIPR;noIPR;IPR010926;IPR001609;IPR000048;IPR036072;IPR027417
TRINITY_DN100238_c1_g1_i17	PREDICTED: myosin-IB	5791	1	0.0E0	81.35%	gi|391334525|ref|XP_003741654.1|PREDICTED: myosin-IB [Galendromus occidentalis]	Galendromus occidentalis	EC:3.6.1.15	Nucleoside-triphosphate phosphatase	IPR001609;IPR010926;noIPR;IPR001609;noIPR;noIPR;noIPR;IPR036961;noIPR;noIPR;noIPR;IPR010926;IPR001609;IPR000048;IPR036072;IPR027417
TRINITY_DN100238_c1_g1_i18	PREDICTED: myosin-IB	4198	1	0.0E0	81.43%	gi|391334525|ref|XP_003741654.1|PREDICTED: myosin-IB [Galendromus occidentalis]	Galendromus occidentalis	EC:3.6.1.15	Nucleoside-triphosphate phosphatase	IPR001609;noIPR;IPR036961;IPR010926;noIPR;IPR001609;noIPR;noIPR;noIPR;noIPR;noIPR;IPR000048;IPR010926;IPR001609;IPR036072;IPR027417
TRINITY_DN100238_c1_g1_i2	unconventional myosin-Ic-like	2722	1	1.0E-282	87.03%	gi|1238880753|ref|XP_022253422.1|unconventional myosin-Ic-like, partial [Limulus polyphemus]	Limulus polyphemus	EC:3.6.1.15	Nucleoside-triphosphate phosphatase	IPR001609;noIPR;IPR036961;noIPR;noIPR;IPR001609;noIPR;noIPR;IPR001609;IPR036072;IPR027417
TRINITY_DN100238_c1_g1_i3	PREDICTED: myosin-IB	4204	1	0.0E0	81.43%	gi|391334525|ref|XP_003741654.1|PREDICTED: myosin-IB [Galendromus occidentalis]	Galendromus occidentalis	EC:3.6.1.15	Nucleoside-triphosphate phosphatase	IPR001609;noIPR;IPR036961;IPR010926;noIPR;IPR001609;noIPR;noIPR;noIPR;noIPR;noIPR;IPR000048;IPR010926;IPR001609;IPR036072;IPR027417
TRINITY_DN100238_c1_g1_i4	PREDICTED: myosin-IB	1313	1	8.5E-158	87.43%	gi|391334525|ref|XP_003741654.1|PREDICTED: myosin-IB [Galendromus occidentalis]	Galendromus occidentalis	EC:3.6.1.15	Nucleoside-triphosphate phosphatase	IPR001609;IPR036961;noIPR;IPR001609;noIPR;noIPR;IPR001609;IPR027417
TRINITY_DN100238_c1_g1_i5	PREDICTED: myosin-IB	3360	1	0.0E0	84.61%	gi|391334525|ref|XP_003741654.1|PREDICTED: myosin-IB [Galendromus occidentalis]	Galendromus occidentalis	EC:3.6.1.15	Nucleoside-triphosphate phosphatase	IPR001609;noIPR;noIPR;IPR036961;noIPR;noIPR;noIPR;IPR001609;noIPR;noIPR;IPR001609;IPR000048;IPR036072;IPR027417
TRINITY_DN100238_c1_g1_i7	unconventional myosin-Ic-like	1897	1	4.2E-158	88.08%	gi|1238880753|ref|XP_022253422.1|unconventional myosin-Ic-like, partial [Limulus polyphemus]	Limulus polyphemus	EC:3.6.1.15	Nucleoside-triphosphate phosphatase	IPR001609;IPR036961;IPR001609;noIPR;noIPR;noIPR;IPR001609;IPR027417
TRINITY_DN100238_c1_g1_i8	PREDICTED: myosin-IB	5786	1	0.0E0	81.35%	gi|391334525|ref|XP_003741654.1|PREDICTED: myosin-IB [Galendromus occidentalis]	Galendromus occidentalis	EC:3.6.1.15	Nucleoside-triphosphate phosphatase	IPR001609;IPR010926;noIPR;IPR001609;noIPR;noIPR;IPR036961;noIPR;noIPR;noIPR;noIPR;IPR010926;IPR001609;IPR000048;IPR036072;IPR027417
TRINITY_DN100238_c1_g1_i9	unconventional myosin-Ic-like	3033	1	0.0E0	85.52%	gi|1238880753|ref|XP_022253422.1|unconventional myosin-Ic-like, partial [Limulus polyphemus]	Limulus polyphemus	EC:3.6.1.15	Nucleoside-triphosphate phosphatase	IPR001609;noIPR;noIPR;noIPR;IPR036961;IPR001609;noIPR;noIPR;noIPR;noIPR;IPR000048;IPR001609;IPR036072;IPR027417
TRINITY_DN100239_c5_g1_i1	sugar transporter, putative	2880	1	5.8E-127	76.47%	gi|241571917|ref|XP_002402964.1|sugar transporter, putative [Ixodes scapularis]/gi|215500161|gb|EEC09655.1| sugar transporter, putative [Ixodes scapularis]	Ixodes scapularis/Ixodes scapularis			IPR003663;noIPR;IPR003663;IPR005828;noIPR;noIPR;IPR020846;IPR020846;IPR036259
TRINITY_DN100239_c5_g1_i3	sugar transporter, putative	2517	1	1.3E-125	76.21%	gi|241571917|ref|XP_002402964.1|sugar transporter, putative [Ixodes scapularis]/gi|215500161|gb|EEC09655.1| sugar transporter, putative [Ixodes scapularis]	Ixodes scapularis/Ixodes scapularis			IPR003663;IPR003663;IPR005828;noIPR;noIPR;noIPR;IPR020846;IPR020846;IPR036259
TRINITY_DN100240_c3_g2_i1	tho2 protein, putative	1746	1	9.9E-154	62.90%	gi|241326606|ref|XP_002408245.1|tho2 protein, putative [Ixodes scapularis]/gi|215497280|gb|EEC06774.1| tho2 protein, putative [Ixodes scapularis]	Ixodes scapularis/Ixodes scapularis			IPR032302;IPR040007
TRINITY_DN100240_c3_g2_i2	tho2 protein, putative	1835	1	3.6E-138	60.82%	gi|241326606|ref|XP_002408245.1|tho2 protein, putative [Ixodes scapularis]/gi|215497280|gb|EEC06774.1| tho2 protein, putative [Ixodes scapularis]	Ixodes scapularis/Ixodes scapularis			IPR032302;IPR040007
TRINITY_DN100243_c5_g1_i1	adenylate cyclase, putative	615	1	1.3E-52	70.85%	gi|241090359|ref|XP_002409305.1|adenylate cyclase, putative [Ixodes scapularis]/gi|215492693|gb|EEC02334.1| adenylate cyclase, putative [Ixodes scapularis]	Ixodes scapularis/Ixodes scapularis			noIPR;noIPR;noIPR;IPR036259
TRINITY_DN100243_c5_g1_i4	adenylate cyclase, putative	5256	1	4.0E-142	69.19%	gi|241090359|ref|XP_002409305.1|adenylate cyclase, putative [Ixodes scapularis]/gi|215492693|gb|EEC02334.1| adenylate cyclase, putative [Ixodes scapularis]	Ixodes scapularis/Ixodes scapularis			noIPR;noIPR;noIPR;noIPR;noIPR;noIPR;IPR020846;IPR036259
TRINITY_DN100243_c5_g1_i7	adenylate cyclase, putative	1172	1	3.8E-77	64.67%	gi|241090359|ref|XP_002409305.1|adenylate cyclase, putative [Ixodes scapularis]/gi|215492693|gb|EEC02334.1| adenylate cyclase, putative [Ixodes scapularis]	Ixodes scapularis/Ixodes scapularis			IPR011701;noIPR;noIPR;noIPR;noIPR;noIPR;IPR020846;IPR036259
TRINITY_DN100243_c5_g1_i8	adenylate cyclase, putative	5250	1	4.0E-142	69.19%	gi|241090359|ref|XP_002409305.1|adenylate cyclase, putative [Ixodes scapularis]/gi|215492693|gb|EEC02334.1| adenylate cyclase, putative [Ixodes scapularis]	Ixodes scapularis/Ixodes scapularis			IPR011701;noIPR;noIPR;noIPR;noIPR;noIPR;noIPR;IPR020846;IPR036259
TRINITY_DN100243_c5_g1_i9	adenylate cyclase, putative	710	1	1.2E-36	62.25%	gi|241090359|ref|XP_002409305.1|adenylate cyclase, putative [Ixodes scapularis]/gi|215492693|gb|EEC02334.1| adenylate cyclase, putative [Ixodes scapularis]	Ixodes scapularis/Ixodes scapularis			IPR005828;noIPR;noIPR;noIPR;noIPR;noIPR;IPR036259
TRINITY_DN100244_c2_g1_i1	PREDICTED: uncharacterized protein LOC107348098	771	1	5.7E-21	54.30%	gi|1005423018|ref|XP_015769595.1|PREDICTED: uncharacterized protein LOC107348098 [Acropora digitifera]	Acropora digitifera
TRINITY_DN100244_c3_g1_i1	hypothetical protein BSL78_22613	3199	1	1.0E-108	57.67%	gi|1274993230|gb|PIK40527.1|hypothetical protein BSL78_22613 [Apostichopus japonicus]	Apostichopus japonicus			noIPR;IPR000477
TRINITY_DN100244_c3_g1_i2	hypothetical protein BSL78_22613	3334	1	1.1E-108	57.67%	gi|1274993230|gb|PIK40527.1|hypothetical protein BSL78_22613 [Apostichopus japonicus]	Apostichopus japonicus			noIPR;IPR000477
TRINITY_DN100244_c3_g1_i3	hypothetical protein BSL78_22613	3102	1	1.0E-108	57.67%	gi|1274993230|gb|PIK40527.1|hypothetical protein BSL78_22613 [Apostichopus japonicus]	Apostichopus japonicus			noIPR;IPR000477
TRINITY_DN100245_c2_g1_i2	uncharacterized protein K02A2.6-like	2474	1	2.3E-180	62.19%	gi|939314744|ref|XP_014263051.1|uncharacterized protein K02A2.6-like [Maylandia zebra]	Maylandia zebra			noIPR;noIPR;IPR041373;noIPR;IPR000477;noIPR;noIPR;noIPR;noIPR;noIPR;noIPR;IPR000477;IPR001878;noIPR;noIPR;noIPR;IPR036875
TRINITY_DN100245_c2_g1_i3	transposon, putative	1582	1	3.1E-29	65.12%	gi|241998042|ref|XP_002433664.1|transposon, putative [Ixodes scapularis]/gi|215495423|gb|EEC05064.1| transposon, putative [Ixodes scapularis]	Ixodes scapularis/Ixodes scapularis			noIPR;noIPR
TRINITY_DN100245_c2_g1_i4	uncharacterized protein K02A2.6-like	2748	1	2.3E-213	61.73%	gi|939314744|ref|XP_014263051.1|uncharacterized protein K02A2.6-like [Maylandia zebra]	Maylandia zebra			noIPR;noIPR;IPR036397;noIPR;IPR041588;noIPR;noIPR;noIPR;IPR041373;IPR000477;noIPR;noIPR;noIPR;noIPR;IPR000477;IPR001878;noIPR;noIPR;IPR036875;noIPR;IPR012337
TRINITY_DN100245_c2_g1_i5	PREDICTED: LOW QUALITY PROTEIN: uncharacterized protein K02A2.6-like	3491	1	1.6E-91	71.92%	gi|1110948857|ref|XP_019216119.1|PREDICTED: LOW QUALITY PROTEIN: uncharacterized protein K02A2.6-like [Oreochromis niloticus]	Oreochromis niloticus			noIPR;IPR000477;noIPR;noIPR;noIPR;IPR041373;noIPR;noIPR;noIPR;noIPR;noIPR;noIPR;noIPR;noIPR;noIPR
TRINITY_DN100248_c2_g1_i2	alpha-macroglobulin, putative	3354	1	1.8E-180	51.71%	gi|241255092|ref|XP_002404137.1|alpha-macroglobulin, putative [Ixodes scapularis]/gi|215496600|gb|EEC06240.1| alpha-macroglobulin, putative, partial [Ixodes scapularis]	Ixodes scapularis/Ixodes scapularis			IPR011626;IPR013783;noIPR;noIPR;IPR041555;noIPR;noIPR;IPR013783;noIPR;IPR011625;IPR001599;noIPR;IPR008930;IPR014756
TRINITY_DN100248_c2_g1_i4	alpha-macroglobulin, putative	4842	1	6.6E-240	54.54%	gi|241255092|ref|XP_002404137.1|alpha-macroglobulin, putative [Ixodes scapularis]/gi|215496600|gb|EEC06240.1| alpha-macroglobulin, putative, partial [Ixodes scapularis]	Ixodes scapularis/Ixodes scapularis			IPR041555;IPR013783;noIPR;IPR001599;noIPR;noIPR;noIPR;IPR011625;IPR013783;IPR011626;IPR009048;noIPR;IPR036595;noIPR;noIPR;noIPR;IPR036595;IPR014756;IPR008930
TRINITY_DN100249_c4_g1_i4	hypothetical protein IscW_ISCW013724	1227	1	5.9E-12	60.91%	gi|241839873|ref|XP_002415284.1|hypothetical protein IscW_ISCW013724 [Ixodes scapularis]/gi|215509496|gb|EEC18949.1| hypothetical protein IscW_ISCW013724, partial [Ixodes scapularis]	Ixodes scapularis/Ixodes scapularis
TRINITY_DN100249_c4_g1_i6	hypothetical protein IscW_ISCW013724	1522	1	4.6E-14	62.93%	gi|241839873|ref|XP_002415284.1|hypothetical protein IscW_ISCW013724 [Ixodes scapularis]/gi|215509496|gb|EEC18949.1| hypothetical protein IscW_ISCW013724, partial [Ixodes scapularis]	Ixodes scapularis/Ixodes scapularis
TRINITY_DN100249_c4_g1_i7	hypothetical protein IscW_ISCW013724	1250	1	6.0E-12	61.26%	gi|241839873|ref|XP_002415284.1|hypothetical protein IscW_ISCW013724 [Ixodes scapularis]/gi|215509496|gb|EEC18949.1| hypothetical protein IscW_ISCW013724, partial [Ixodes scapularis]	Ixodes scapularis/Ixodes scapularis
TRINITY_DN100249_c4_g1_i8	hypothetical protein IscW_ISCW013724	1527	1	4.6E-14	62.93%	gi|241839873|ref|XP_002415284.1|hypothetical protein IscW_ISCW013724 [Ixodes scapularis]/gi|215509496|gb|EEC18949.1| hypothetical protein IscW_ISCW013724, partial [Ixodes scapularis]	Ixodes scapularis/Ixodes scapularis
TRINITY_DN100249_c4_g1_i9	hypothetical protein IscW_ISCW013724	1179	1	5.7E-12	60.91%	gi|241839873|ref|XP_002415284.1|hypothetical protein IscW_ISCW013724 [Ixodes scapularis]/gi|215509496|gb|EEC18949.1| hypothetical protein IscW_ISCW013724, partial [Ixodes scapularis]	Ixodes scapularis/Ixodes scapularis
TRINITY_DN100250_c5_g1_i2	dathoxin-4	2012	1	1.0E-13	53.10%	gi|167613929|gb|ABZ89564.1|dathoxin-4 [Dermacentor andersoni]	Dermacentor andersoni			IPR036880;IPR036880;noIPR;noIPR;noIPR;noIPR;noIPR;noIPR;noIPR;noIPR;noIPR;noIPR;IPR036880;IPR036880
TRINITY_DN100250_c5_g1_i3	dathoxin-4	1730	1	8.9E-14	53.10%	gi|167613929|gb|ABZ89564.1|dathoxin-4 [Dermacentor andersoni]	Dermacentor andersoni			IPR036880;IPR036880;noIPR;noIPR;noIPR;noIPR;noIPR;noIPR;noIPR;noIPR;IPR036880;IPR036880
TRINITY_DN100250_c5_g1_i5	putative Kunitz-BPTI protein	1316	1	6.8E-14	53.10%	gi|194246039|gb|ACF35511.1|putative Kunitz-BPTI protein [Dermacentor variabilis]	Dermacentor variabilis			IPR036880;noIPR;noIPR;noIPR;noIPR;noIPR;noIPR;noIPR;IPR036880
TRINITY_DN100252_c2_g2_i1	RNA polymerase II transcription elongation factor, putative	1067	1	8.4E-55	93.33%	gi|241009440|ref|XP_002405270.1|RNA polymerase II transcription elongation factor, putative [Ixodes scapularis]/gi|215491726|gb|EEC01367.1| RNA polymerase II transcription elongation factor, putative [Ixodes scapularis]	Ixodes scapularis/Ixodes scapularis			noIPR;IPR016073;IPR039948;noIPR;IPR011333
TRINITY_DN100255_c2_g1_i1	small heat shock protein I	2866	1	4.8E-57	98.25%	gi|507849053|gb|AGM71680.1|small heat shock protein I [Rhipicephalus annulatus]	Rhipicephalus annulatus			IPR001436;IPR008978;IPR002068;noIPR;IPR031107;IPR002068;noIPR;IPR008978
TRINITY_DN100255_c2_g2_i1	small heat shock protein I	1345	1	4.1E-22	90.32%	gi|507849053|gb|AGM71680.1|small heat shock protein I [Rhipicephalus annulatus]	Rhipicephalus annulatus
TRINITY_DN100255_c2_g2_i2	small heat shock protein I	1334	1	4.0E-22	90.32%	gi|507849053|gb|AGM71680.1|small heat shock protein I [Rhipicephalus annulatus]	Rhipicephalus annulatus
TRINITY_DN100256_c1_g2_i1	uncharacterized protein LOC107456862	2719	1	8.3E-83	58.20%	gi|1009604801|ref|XP_015930315.1|uncharacterized protein LOC107456862 [Parasteatoda tepidariorum]	Parasteatoda tepidariorum			noIPR;IPR012337
TRINITY_DN100256_c1_g2_i2	uncharacterized protein LOC107456862	2705	1	8.3E-83	58.20%	gi|1009604801|ref|XP_015930315.1|uncharacterized protein LOC107456862 [Parasteatoda tepidariorum]	Parasteatoda tepidariorum			noIPR;IPR012337
TRINITY_DN100258_c1_g1_i1	centromere protein B, putative	719	1	7.4E-23	62.66%	gi|241691397|ref|XP_002411783.1|centromere protein B, putative [Ixodes scapularis]/gi|215504628|gb|EEC14122.1| centromere protein B, putative [Ixodes scapularis]	Ixodes scapularis/Ixodes scapularis			IPR004875;noIPR;noIPR
TRINITY_DN100258_c1_g2_i4	CENP-B-like protein 2	664	1	4.6E-27	63.11%	gi|1057722545|gb|AOE48154.1|CENP-B-like protein 2 [Locusta migratoria]	Locusta migratoria
TRINITY_DN100258_c3_g1_i1	zinc transporter ZIP11 isoform X2	1007	1	2.2E-73	72.67%	gi|1357750529|ref|XP_024120261.1|zinc transporter ZIP11 isoform X2 [Oryzias melastigma]	Oryzias melastigma			IPR003689;noIPR;noIPR
TRINITY_DN100258_c3_g1_i2	zinc transporter ZIP11 isoform X2	945	1	1.4E-58	70.55%	gi|1357750529|ref|XP_024120261.1|zinc transporter ZIP11 isoform X2 [Oryzias melastigma]	Oryzias melastigma			IPR003689;noIPR;noIPR
TRINITY_DN100258_c3_g1_i3	zinc transporter ZIP11 isoform X2	3110	1	6.6E-84	74.17%	gi|1357750529|ref|XP_024120261.1|zinc transporter ZIP11 isoform X2 [Oryzias melastigma]	Oryzias melastigma			IPR003689;noIPR;noIPR
TRINITY_DN100258_c3_g1_i5	zinc transporter ZIP11 isoform X2	3990	1	8.2E-71	71.99%	gi|1357750529|ref|XP_024120261.1|zinc transporter ZIP11 isoform X2 [Oryzias melastigma]	Oryzias melastigma			IPR003689;noIPR;noIPR
TRINITY_DN100260_c2_g1_i1	PREDICTED: uncharacterized protein LOC105556508, partial	1839	1	7.3E-14	62.63%	gi|795008806|ref|XP_011858998.1|PREDICTED: uncharacterized protein LOC105556508, partial [Vollenhovia emeryi]	Vollenhovia emeryi
TRINITY_DN100260_c2_g1_i2	hypothetical protein IscW_ISCW000379	1345	1	3.1E-14	53.91%	gi|240975982|ref|XP_002402242.1|hypothetical protein IscW_ISCW000379 [Ixodes scapularis]/gi|215491131|gb|EEC00772.1| hypothetical protein IscW_ISCW000379 [Ixodes scapularis]	Ixodes scapularis/Ixodes scapularis
TRINITY_DN100260_c2_g1_i4	PREDICTED: uncharacterized protein LOC105203507	1882	1	3.6E-16	57.26%	gi|751233822|ref|XP_011170610.1|PREDICTED: uncharacterized protein LOC105203507 [Solenopsis invicta]	Solenopsis invicta
TRINITY_DN100260_c2_g1_i6	hypothetical protein IscW_ISCW000379	2158	1	5.0E-14	53.91%	gi|240975982|ref|XP_002402242.1|hypothetical protein IscW_ISCW000379 [Ixodes scapularis]/gi|215491131|gb|EEC00772.1| hypothetical protein IscW_ISCW000379 [Ixodes scapularis]	Ixodes scapularis/Ixodes scapularis
TRINITY_DN100260_c2_g1_i7	hypothetical protein IscW_ISCW000379	1208	1	2.8E-14	53.91%	gi|240975982|ref|XP_002402242.1|hypothetical protein IscW_ISCW000379 [Ixodes scapularis]/gi|215491131|gb|EEC00772.1| hypothetical protein IscW_ISCW000379 [Ixodes scapularis]	Ixodes scapularis/Ixodes scapularis
TRINITY_DN100260_c2_g2_i1	PREDICTED: uncharacterized protein LOC105570767 isoform X1	1511	1	4.2E-28	53.78%	gi|795013618|ref|XP_011883596.1|PREDICTED: uncharacterized protein LOC105570767 isoform X1 [Vollenhovia emeryi]	Vollenhovia emeryi
TRINITY_DN100260_c2_g2_i5	PREDICTED: uncharacterized protein LOC105570767 isoform X1	1610	1	6.8E-24	57.75%	gi|795013618|ref|XP_011883596.1|PREDICTED: uncharacterized protein LOC105570767 isoform X1 [Vollenhovia emeryi]	Vollenhovia emeryi
TRINITY_DN100260_c2_g2_i8	PREDICTED: uncharacterized protein LOC105570767 isoform X1	2088	1	8.8E-24	57.75%	gi|795013618|ref|XP_011883596.1|PREDICTED: uncharacterized protein LOC105570767 isoform X1 [Vollenhovia emeryi]	Vollenhovia emeryi
TRINITY_DN100266_c3_g2_i1	sarm1, putative	5982	1	0.0E0	89.17%	gi|241679731|ref|XP_002400834.1|sarm1, putative [Ixodes scapularis]/gi|215504279|gb|EEC13773.1| sarm1, putative, partial [Ixodes scapularis]	Ixodes scapularis/Ixodes scapularis			noIPR;IPR000157;IPR011989;IPR035897;IPR001660;noIPR;noIPR;noIPR;noIPR;noIPR;noIPR;noIPR;noIPR;noIPR;IPR039184;IPR000157;IPR001660;IPR001660;noIPR;noIPR;IPR013761;IPR016024;IPR035897;IPR013761
TRINITY_DN100266_c3_g2_i2	sarm1, putative	6023	1	0.0E0	89.17%	gi|241679731|ref|XP_002400834.1|sarm1, putative [Ixodes scapularis]/gi|215504279|gb|EEC13773.1| sarm1, putative, partial [Ixodes scapularis]	Ixodes scapularis/Ixodes scapularis			noIPR;IPR000157;IPR011989;IPR035897;IPR001660;noIPR;noIPR;noIPR;noIPR;noIPR;noIPR;noIPR;noIPR;noIPR;IPR039184;IPR000157;IPR001660;IPR001660;noIPR;noIPR;IPR013761;IPR016024;IPR035897;IPR013761
TRINITY_DN100266_c3_g2_i3	sarm1, putative	2526	1	3.0E-95	94.71%	gi|241679731|ref|XP_002400834.1|sarm1, putative [Ixodes scapularis]/gi|215504279|gb|EEC13773.1| sarm1, putative, partial [Ixodes scapularis]	Ixodes scapularis/Ixodes scapularis			IPR035897;IPR000157;noIPR;noIPR;IPR039184;IPR000157;IPR035897
TRINITY_DN100266_c3_g2_i4	sterile alpha and TIR motif-containing protein 1-like isoform X1	2053	1	2.9E-43	90.16%	gi|1316141459|ref|XP_023215693.1|sterile alpha and TIR motif-containing protein 1-like isoform X1 [Centruroides sculpturatus]	Centruroides sculpturatus			noIPR;noIPR;IPR039184
TRINITY_DN100268_c2_g1_i3	choline O-acetyltransferase-like	694	1	6.1E-6	58.33%	gi|1316134079|ref|XP_023223747.1|LOW QUALITY PROTEIN: choline O-acetyltransferase-like [Centruroides sculpturatus]	Centruroides sculpturatus			noIPR;IPR001878;IPR036875
TRINITY_DN100268_c2_g1_i4	choline O-acetyltransferase-like	561	1	4.9E-6	58.33%	gi|1316134079|ref|XP_023223747.1|LOW QUALITY PROTEIN: choline O-acetyltransferase-like [Centruroides sculpturatus]	Centruroides sculpturatus			IPR001878;noIPR;IPR001878;IPR036875
TRINITY_DN100268_c2_g1_i7	choline O-acetyltransferase-like	694	1	6.1E-6	58.33%	gi|1316134079|ref|XP_023223747.1|LOW QUALITY PROTEIN: choline O-acetyltransferase-like [Centruroides sculpturatus]	Centruroides sculpturatus			IPR001878;IPR036875
TRINITY_DN100269_c3_g1_i2	TPA_inf: hypothetical conserved protein 916	787	1	1.6E-7	76.09%	gi|325303292|tpg|DAA34782.1|TPA_inf: hypothetical conserved protein 916 [Amblyomma variegatum]	Amblyomma variegatum
TRINITY_DN100269_c3_g1_i3	TPA_inf: hypothetical conserved protein 916	787	1	1.6E-7	76.09%	gi|325303292|tpg|DAA34782.1|TPA_inf: hypothetical conserved protein 916 [Amblyomma variegatum]	Amblyomma variegatum
TRINITY_DN100270_c4_g1_i1	VWFA and cache domain-containing protein 1-like isoform X2	5206	1	0.0E0	72.38%	gi|1238859618|ref|XP_022246419.1|VWFA and cache domain-containing protein 1-like isoform X2 [Limulus polyphemus]	Limulus polyphemus			noIPR;noIPR;IPR033479;IPR036465;noIPR;noIPR;noIPR;noIPR;IPR002035;IPR036465;IPR029151
TRINITY_DN100270_c4_g1_i3	VWFA and cache domain-containing protein 1	1796	1	1.3E-28	63.29%	gi|675383726|gb|KFM76623.1|VWFA and cache domain-containing protein 1, partial [Stegodyphus mimosarum]	Stegodyphus mimosarum			noIPR;noIPR
TRINITY_DN100271_c1_g1_i1	protein dopey-1, putative	8118	1	0.0E0	77.07%	gi|241603777|ref|XP_002405754.1|protein dopey-1, putative [Ixodes scapularis]/gi|215502565|gb|EEC12059.1| protein dopey-1, putative [Ixodes scapularis]	Ixodes scapularis/Ixodes scapularis			IPR007249;noIPR;noIPR;noIPR;noIPR;IPR040314;IPR016024
TRINITY_DN100271_c1_g1_i2	protein dopey-1, putative	8106	1	0.0E0	77.20%	gi|241603777|ref|XP_002405754.1|protein dopey-1, putative [Ixodes scapularis]/gi|215502565|gb|EEC12059.1| protein dopey-1, putative [Ixodes scapularis]	Ixodes scapularis/Ixodes scapularis			IPR007249;noIPR;noIPR;noIPR;noIPR;IPR040314;IPR016024
TRINITY_DN100272_c5_g1_i1	T-box transcription factor TBX2-like isoform X2	1997	1	8.1E-11	65.48%	gi|1253764154|ref|XP_022666180.1|T-box transcription factor TBX2-like isoform X2 [Varroa destructor]	Varroa destructor			noIPR;noIPR;noIPR;noIPR;noIPR;IPR001699
TRINITY_DN100272_c5_g1_i2	T-box transcription factor TBX2-like isoform X2	4629	1	2.9E-96	83.40%	gi|1253764154|ref|XP_022666180.1|T-box transcription factor TBX2-like isoform X2 [Varroa destructor]	Varroa destructor			IPR001699;IPR001699;IPR036960;noIPR;noIPR;noIPR;noIPR;noIPR;noIPR;noIPR;IPR001699;IPR001699;IPR001699;IPR008967
TRINITY_DN100272_c5_g1_i3	optomotor-blind protein isoform X3	4479	1	6.8E-66	76.38%	gi|1009592872|ref|XP_015925372.1|optomotor-blind protein isoform X3 [Parasteatoda tepidariorum]	Parasteatoda tepidariorum			IPR001699;IPR036960;IPR001699;noIPR;noIPR;noIPR;noIPR;noIPR;noIPR;noIPR;noIPR;IPR001699;IPR001699;IPR001699;IPR001699;IPR008967
TRINITY_DN100272_c5_g1_i4	T-box transcription factor TBX2-like isoform X2	1997	1	8.1E-11	65.48%	gi|1253764154|ref|XP_022666180.1|T-box transcription factor TBX2-like isoform X2 [Varroa destructor]	Varroa destructor			noIPR;noIPR;noIPR;noIPR;noIPR;IPR001699
TRINITY_DN100272_c5_g1_i5	T-box transcription factor TBX2-like isoform X2	4649	1	3.0E-96	83.40%	gi|1253764154|ref|XP_022666180.1|T-box transcription factor TBX2-like isoform X2 [Varroa destructor]	Varroa destructor			IPR001699;IPR001699;IPR036960;noIPR;noIPR;noIPR;noIPR;noIPR;noIPR;noIPR;IPR001699;IPR001699;IPR001699;IPR008967
TRINITY_DN100272_c5_g1_i6	optomotor-blind protein isoform X3	4499	1	6.9E-66	76.38%	gi|1009592872|ref|XP_015925372.1|optomotor-blind protein isoform X3 [Parasteatoda tepidariorum]	Parasteatoda tepidariorum			IPR001699;IPR036960;IPR001699;noIPR;noIPR;noIPR;noIPR;noIPR;noIPR;noIPR;IPR001699;IPR001699;IPR001699;IPR008967
TRINITY_DN100273_c3_g1_i1	filamin-B-like	1929	1	3.5E-152	91.06%	gi|1316197770|ref|XP_023244649.1|filamin-B-like [Centruroides sculpturatus]	Centruroides sculpturatus			IPR017868;IPR013783;IPR013783;IPR013783;noIPR;noIPR;IPR017868;IPR017868;IPR017868;IPR014756;IPR014756;IPR014756
TRINITY_DN100273_c3_g1_i2	filamin-A	2574	1	7.6E-203	59.45%	gi|1192747483|ref|XP_021003538.1|filamin-A [Parasteatoda tepidariorum]	Parasteatoda tepidariorum			IPR013783;IPR017868;IPR013783;IPR036872;IPR013783;IPR001715;noIPR;noIPR;noIPR;noIPR;noIPR;noIPR;noIPR;noIPR;noIPR;IPR001715;IPR017868;IPR001715;IPR017868;IPR017868;IPR017868;IPR001715;IPR014756;IPR014756;IPR036872;IPR036872;IPR014756;IPR014756;IPR014756
TRINITY_DN100273_c3_g1_i5	conserved hypothetical protein	9977	1	0.0E0	79.42%	gi|241598307|ref|XP_002404728.1|conserved hypothetical protein [Ixodes scapularis]/gi|215500460|gb|EEC09954.1| conserved hypothetical protein [Ixodes scapularis]	Ixodes scapularis/Ixodes scapularis			IPR001715;IPR013783;IPR013783;IPR013783;IPR036872;IPR036872;IPR013783;IPR013783;IPR017868;IPR013783;IPR013783;noIPR;noIPR;noIPR;noIPR;noIPR;noIPR;noIPR;noIPR;noIPR;noIPR;noIPR;noIPR;noIPR;IPR017868;IPR017868;IPR001715;IPR017868;IPR017868;IPR017868;IPR017868;IPR017868;IPR001715;IPR017868;IPR017868;IPR017868;IPR017868;IPR017868;IPR017868;IPR017868;IPR001715;IPR017868;IPR017868;IPR017868;IPR017868;I…
TRINITY_DN100273_c3_g1_i6	Filamin-A, partial	1074	1	1.3E-87	88.29%	gi|675387921|gb|KFM80818.1|Filamin-A, partial [Stegodyphus mimosarum]	Stegodyphus mimosarum			IPR036872;IPR036872;IPR001715;noIPR;IPR001715;IPR001715;IPR001715;IPR036872
TRINITY_DN100274_c1_g1_i1	ral GTPase-activating protein subunit beta-like isoform X2	1398	1	1.4E-41	60.64%	gi|1238860492|ref|XP_022246785.1|ral GTPase-activating protein subunit beta-like isoform X2 [Limulus polyphemus]	Limulus polyphemus			IPR039930;noIPR;IPR035974
TRINITY_DN100274_c1_g1_i2	ral GTPase-activating protein subunit beta-like isoform X2	2405	1	2.4E-41	60.64%	gi|1238860492|ref|XP_022246785.1|ral GTPase-activating protein subunit beta-like isoform X2 [Limulus polyphemus]	Limulus polyphemus			IPR039930;noIPR;IPR035974
TRINITY_DN100274_c1_g1_i3	ral GTPase-activating protein subunit beta-like isoform X2	1530	1	1.5E-41	60.64%	gi|1238860492|ref|XP_022246785.1|ral GTPase-activating protein subunit beta-like isoform X2 [Limulus polyphemus]	Limulus polyphemus			IPR039930;noIPR;IPR035974
TRINITY_DN100274_c1_g1_i4	ral GTPase-activating protein subunit beta-like isoform X2	1465	1	1.5E-41	60.64%	gi|1238860492|ref|XP_022246785.1|ral GTPase-activating protein subunit beta-like isoform X2 [Limulus polyphemus]	Limulus polyphemus			IPR039930;noIPR;IPR035974
TRINITY_DN100274_c2_g1_i1	Ral GTPase-activating protein subunit beta	2768	1	6.0E-230	70.01%	gi|675384548|gb|KFM77445.1|Ral GTPase-activating protein subunit beta, partial [Stegodyphus mimosarum]	Stegodyphus mimosarum			noIPR;noIPR;noIPR;noIPR;noIPR;noIPR;noIPR;IPR039930
TRINITY_DN100274_c2_g1_i2	Ral GTPase-activating protein subunit beta	4313	1	0.0E0	69.03%	gi|675384548|gb|KFM77445.1|Ral GTPase-activating protein subunit beta, partial [Stegodyphus mimosarum]	Stegodyphus mimosarum			noIPR;noIPR;noIPR;noIPR;noIPR;noIPR;noIPR;noIPR;IPR039930;IPR000331;IPR035974
TRINITY_DN100274_c2_g1_i3	hypothetical protein IscW_ISCW006873	542	1	1.6E-17	94.34%	gi|241999684|ref|XP_002434485.1|hypothetical protein IscW_ISCW006873 [Ixodes scapularis]/gi|215497815|gb|EEC07309.1| hypothetical protein IscW_ISCW006873 [Ixodes scapularis]	Ixodes scapularis/Ixodes scapularis
TRINITY_DN100278_c4_g1_i1	adenylate cyclase-associated protein, putative	1755	1	3.1E-200	82.10%	gi|241853668|ref|XP_002415912.1|adenylate cyclase-associated protein, putative [Ixodes scapularis]/gi|215510126|gb|EEC19579.1| adenylate cyclase-associated protein, putative [Ixodes scapularis]	Ixodes scapularis/Ixodes scapularis			IPR013912;IPR036222;IPR016098;IPR013992;noIPR;noIPR;noIPR;noIPR;IPR001837;IPR017901;IPR036223;IPR036222;IPR036222
TRINITY_DN100278_c4_g1_i2	adenylate cyclase-associated protein, putative	1644	1	4.7E-206	88.32%	gi|241853668|ref|XP_002415912.1|adenylate cyclase-associated protein, putative [Ixodes scapularis]/gi|215510126|gb|EEC19579.1| adenylate cyclase-associated protein, putative [Ixodes scapularis]	Ixodes scapularis/Ixodes scapularis			IPR016098;IPR013992;IPR013912;IPR036222;noIPR;noIPR;noIPR;noIPR;IPR001837;IPR017901;IPR036223;IPR036222
TRINITY_DN100279_c0_g1_i1	galactosyltransferase, putative	2033	1	3.3E-132	84.49%	gi|241999262|ref|XP_002434274.1|galactosyltransferase, putative [Ixodes scapularis]/gi|215496033|gb|EEC05674.1| galactosyltransferase, putative [Ixodes scapularis]	Ixodes scapularis/Ixodes scapularis			IPR002659;IPR002659;noIPR
TRINITY_DN100279_c0_g1_i2	galactosyltransferase, putative	1999	1	3.2E-132	84.49%	gi|241999262|ref|XP_002434274.1|galactosyltransferase, putative [Ixodes scapularis]/gi|215496033|gb|EEC05674.1| galactosyltransferase, putative [Ixodes scapularis]	Ixodes scapularis/Ixodes scapularis			IPR002659;noIPR;IPR002659
TRINITY_DN100280_c2_g1_i2	Slc30a2	1410	1	1.0E-60	77.72%	gi|1355981271|gb|PRD28489.1|Slc30a2 [Nephila clavipes]	Nephila clavipes			IPR002524;IPR027469;IPR002524;noIPR;noIPR;noIPR;noIPR;IPR027469
TRINITY_DN100280_c2_g1_i3	Slc30a2	1807	1	1.3E-60	77.72%	gi|1355981271|gb|PRD28489.1|Slc30a2 [Nephila clavipes]	Nephila clavipes			IPR002524;IPR027469;IPR002524;noIPR;noIPR;noIPR;noIPR;IPR027469
TRINITY_DN100281_c3_g1_i1	hypothetical protein IscW_ISCW021002	6468	1	6.0E-289	67.04%	gi|241747125|ref|XP_002405612.1|hypothetical protein IscW_ISCW021002 [Ixodes scapularis]/gi|215505882|gb|EEC15376.1| hypothetical protein IscW_ISCW021002 [Ixodes scapularis]	Ixodes scapularis/Ixodes scapularis			noIPR;noIPR;noIPR;noIPR
TRINITY_DN100281_c3_g1_i2	hypothetical protein IscW_ISCW021002	6412	1	0.0E0	55.74%	gi|241747125|ref|XP_002405612.1|hypothetical protein IscW_ISCW021002 [Ixodes scapularis]/gi|215505882|gb|EEC15376.1| hypothetical protein IscW_ISCW021002 [Ixodes scapularis]	Ixodes scapularis/Ixodes scapularis			IPR005492;noIPR;noIPR;IPR009039;IPR009039;IPR009039;IPR009039;IPR009039;IPR009039
TRINITY_DN100282_c2_g1_i1	nuclear inhibitor of protein phosphatase-1, putative	1687	1	8.8E-83	96.95%	gi|241554875|ref|XP_002399644.1|nuclear inhibitor of protein phosphatase-1, putative [Ixodes scapularis]/gi|215501716|gb|EEC11210.1| nuclear inhibitor of protein phosphatase-1, putative [Ixodes scapularis]	Ixodes scapularis/Ixodes scapularis			IPR000253;noIPR;noIPR;noIPR;noIPR;noIPR;noIPR;noIPR;IPR000253;IPR000253;IPR008984
TRINITY_DN100282_c2_g1_i2	nuclear inhibitor of protein phosphatase-1, putative	3605	1	1.9E-82	96.95%	gi|241554875|ref|XP_002399644.1|nuclear inhibitor of protein phosphatase-1, putative [Ixodes scapularis]/gi|215501716|gb|EEC11210.1| nuclear inhibitor of protein phosphatase-1, putative [Ixodes scapularis]	Ixodes scapularis/Ixodes scapularis			IPR000253;noIPR;noIPR;noIPR;noIPR;noIPR;noIPR;noIPR;IPR000253;IPR000253;IPR008984
TRINITY_DN100284_c1_g1_i1	hypothetical protein IscW_ISCW003520	2689	1	2.0E-36	52.55%	gi|241256326|ref|XP_002404418.1|hypothetical protein IscW_ISCW003520 [Ixodes scapularis]/gi|215496636|gb|EEC06276.1| hypothetical protein IscW_ISCW003520 [Ixodes scapularis]	Ixodes scapularis/Ixodes scapularis			IPR001878;noIPR;noIPR;noIPR;noIPR;noIPR;noIPR;IPR001878
TRINITY_DN100284_c1_g1_i2	hypothetical protein IscW_ISCW012209	1068	1	1.4E-14	57.04%	gi|241747362|ref|XP_002414319.1|hypothetical protein IscW_ISCW012209 [Ixodes scapularis]/gi|215508173|gb|EEC17627.1| hypothetical protein IscW_ISCW012209 [Ixodes scapularis]	Ixodes scapularis/Ixodes scapularis
TRINITY_DN100284_c1_g1_i3	hypothetical protein IscW_ISCW003520	2605	1	3.4E-33	54.41%	gi|241256326|ref|XP_002404418.1|hypothetical protein IscW_ISCW003520 [Ixodes scapularis]/gi|215496636|gb|EEC06276.1| hypothetical protein IscW_ISCW003520 [Ixodes scapularis]	Ixodes scapularis/Ixodes scapularis			IPR001878;noIPR;noIPR;noIPR;noIPR;IPR001878
TRINITY_DN100287_c2_g1_i1	hypothetical protein IscW_ISCW019646	4151	1	2.7E-303	68.26%	gi|241608413|ref|XP_002405976.1|hypothetical protein IscW_ISCW019646 [Ixodes scapularis]/gi|215500732|gb|EEC10226.1| hypothetical protein IscW_ISCW019646 [Ixodes scapularis]	Ixodes scapularis/Ixodes scapularis			noIPR;noIPR;noIPR;noIPR;IPR001478;noIPR;noIPR;noIPR;noIPR;noIPR;noIPR;noIPR;noIPR;noIPR;noIPR;noIPR;noIPR;noIPR;noIPR;noIPR;noIPR;noIPR;IPR001478;IPR001478;IPR001478;IPR001478;IPR001478;noIPR;noIPR;noIPR;noIPR;noIPR;IPR036034;IPR036892;IPR036034;IPR036034;IPR036034;IPR036034
TRINITY_DN100287_c2_g1_i2	hypothetical protein IscW_ISCW019646	1110	1	6.4E-66	74.47%	gi|241608413|ref|XP_002405976.1|hypothetical protein IscW_ISCW019646 [Ixodes scapularis]/gi|215500732|gb|EEC10226.1| hypothetical protein IscW_ISCW019646 [Ixodes scapularis]	Ixodes scapularis/Ixodes scapularis			noIPR;noIPR;noIPR;noIPR;noIPR;noIPR;noIPR;IPR001478;IPR036034;IPR036892
TRINITY_DN100288_c4_g1_i1	mitogen-activated protein kinase kinase MKK4, putative	4562	1	1.4E-98	90.20%	gi|242001844|ref|XP_002435565.1|mitogen-activated protein kinase kinase MKK4, putative [Ixodes scapularis]/gi|215498901|gb|EEC08395.1| mitogen-activated protein kinase kinase MKK4, putative, partial [Ixodes scapularis]	Ixodes scapularis/Ixodes scapularis			IPR000719;noIPR;noIPR;noIPR;IPR000719;IPR011009
TRINITY_DN100288_c4_g1_i2	mitogen-activated protein kinase kinase MKK4, putative	4723	1	1.4E-98	90.20%	gi|242001844|ref|XP_002435565.1|mitogen-activated protein kinase kinase MKK4, putative [Ixodes scapularis]/gi|215498901|gb|EEC08395.1| mitogen-activated protein kinase kinase MKK4, putative, partial [Ixodes scapularis]	Ixodes scapularis/Ixodes scapularis			IPR000719;noIPR;noIPR;noIPR;IPR000719;IPR011009
TRINITY_DN100288_c4_g1_i4	mitogen-activated protein kinase kinase MKK4, putative	5118	1	1.1E-117	83.33%	gi|242001844|ref|XP_002435565.1|mitogen-activated protein kinase kinase MKK4, putative [Ixodes scapularis]/gi|215498901|gb|EEC08395.1| mitogen-activated protein kinase kinase MKK4, putative, partial [Ixodes scapularis]	Ixodes scapularis/Ixodes scapularis			IPR000719;noIPR;noIPR;noIPR;noIPR;noIPR;IPR000719;IPR011009
TRINITY_DN100288_c4_g1_i5	dual specificity mitogen-activated protein kinase kinase 1-like isoform X1	5429	1	6.8E-193	89.93%	gi|1316165249|ref|XP_023227945.1|dual specificity mitogen-activated protein kinase kinase 1-like isoform X1 [Centruroides sculpturatus]/gi|1316165251|ref|XP_023227947.1| dual specificity mitogen-activated protein kinase kinase 1-like isoform X2 [Centruroides sculpturatus]	Centruroides sculpturatus/Centruroides sculpturatus			IPR000719;noIPR;noIPR;noIPR;noIPR;noIPR;noIPR;IPR000719;noIPR;IPR011009
TRINITY_DN100289_c1_g1_i3	SAT1 isoform 3	1122	1	3.4E-38	87.00%	gi|1331782090|gb|PNI41725.1|SAT1 isoform 3 [Pan troglodytes]	Pan troglodytes	EC:2.3.1.5;EC:2.3.1.57	Arylamine N-acetyltransferase;Diamine N-acetyltransferase	noIPR;noIPR;noIPR;IPR032957;IPR016181
TRINITY_DN100292_c4_g1_i1	F-actin-capping protein subunit alpha-like	2225	1	8.8E-123	83.06%	gi|926614323|ref|XP_013772203.1|F-actin-capping protein subunit alpha-like [Limulus polyphemus]	Limulus polyphemus			IPR002189;noIPR;IPR002189;noIPR;noIPR;noIPR;IPR002189;IPR037282
TRINITY_DN100292_c4_g1_i2	F-actin-capping protein subunit alpha-like	1655	1	7.9E-44	90.18%	gi|926614323|ref|XP_013772203.1|F-actin-capping protein subunit alpha-like [Limulus polyphemus]	Limulus polyphemus
TRINITY_DN100292_c4_g1_i3	F-actin-capping protein subunit alpha-like	958	1	3.8E-123	83.06%	gi|926614323|ref|XP_013772203.1|F-actin-capping protein subunit alpha-like [Limulus polyphemus]	Limulus polyphemus			IPR002189;noIPR;IPR002189;noIPR;noIPR;noIPR;IPR002189;IPR037282
TRINITY_DN100293_c0_g1_i4	hypothetical protein IscW_ISCW013809	994	1	7.9E-7	60.56%	gi|241832572|ref|XP_002414904.1|hypothetical protein IscW_ISCW013809 [Ixodes scapularis]/gi|215509116|gb|EEC18569.1| hypothetical protein IscW_ISCW013809 [Ixodes scapularis]	Ixodes scapularis/Ixodes scapularis			IPR036691;IPR036691
TRINITY_DN100293_c1_g1_i6	hypothetical protein IscW_ISCW021625	755	1	5.1E-22	58.46%	gi|241727395|ref|XP_002412234.1|hypothetical protein IscW_ISCW021625 [Ixodes scapularis]/gi|215505455|gb|EEC14949.1| hypothetical protein IscW_ISCW021625 [Ixodes scapularis]	Ixodes scapularis/Ixodes scapularis			noIPR;noIPR
TRINITY_DN100293_c1_g2_i1	reverse transcriptase, putative	853	1	9.0E-52	75.74%	gi|241564163|ref|XP_002401831.1|reverse transcriptase, putative [Ixodes scapularis]/gi|215499910|gb|EEC09404.1| reverse transcriptase, putative [Ixodes scapularis]	Ixodes scapularis/Ixodes scapularis			IPR000477;noIPR;IPR000477;noIPR;noIPR
TRINITY_DN100293_c1_g2_i2	reverse transcriptase, putative	622	1	6.6E-52	75.74%	gi|241564163|ref|XP_002401831.1|reverse transcriptase, putative [Ixodes scapularis]/gi|215499910|gb|EEC09404.1| reverse transcriptase, putative [Ixodes scapularis]	Ixodes scapularis/Ixodes scapularis			IPR000477;noIPR;IPR000477;noIPR
TRINITY_DN100293_c1_g2_i3	reverse transcriptase, putative	865	1	9.2E-52	75.74%	gi|241564163|ref|XP_002401831.1|reverse transcriptase, putative [Ixodes scapularis]/gi|215499910|gb|EEC09404.1| reverse transcriptase, putative [Ixodes scapularis]	Ixodes scapularis/Ixodes scapularis			IPR000477;noIPR;IPR000477;noIPR;noIPR
TRINITY_DN100293_c1_g2_i4	reverse transcriptase, putative	860	1	9.1E-52	75.74%	gi|241564163|ref|XP_002401831.1|reverse transcriptase, putative [Ixodes scapularis]/gi|215499910|gb|EEC09404.1| reverse transcriptase, putative [Ixodes scapularis]	Ixodes scapularis/Ixodes scapularis			IPR000477;noIPR;IPR000477;noIPR
TRINITY_DN100294_c2_g1_i1	protein crumbs	9951	1	1.2E-118	52.40%	gi|1078804683|ref|XP_018494881.1|PREDICTED: protein crumbs [Galendromus occidentalis]	Galendromus occidentalis			noIPR;noIPR;IPR001881;noIPR;noIPR;noIPR;noIPR;noIPR;noIPR;noIPR;IPR000742;noIPR;noIPR;noIPR;noIPR;noIPR;IPR001791;noIPR;noIPR;noIPR;IPR001791;noIPR;noIPR;noIPR;noIPR;IPR013032;noIPR;noIPR;noIPR;noIPR;noIPR;noIPR;noIPR;noIPR;noIPR;noIPR;noIPR;IPR000742;IPR000742;IPR000742;IPR000742;IPR000742;IPR000742;IPR000742;IPR001791;IPR000742;IPR000742;IPR000742;IPR000742;IPR000742;IPR000742;IPR000742;IPR0007…
TRINITY_DN100294_c2_g1_i2	protein crumbs	9965	1	1.2E-118	52.40%	gi|1078804683|ref|XP_018494881.1|PREDICTED: protein crumbs [Galendromus occidentalis]	Galendromus occidentalis			noIPR;noIPR;IPR001881;noIPR;noIPR;noIPR;noIPR;noIPR;noIPR;noIPR;noIPR;IPR000742;noIPR;noIPR;noIPR;noIPR;noIPR;IPR001791;noIPR;noIPR;IPR001791;noIPR;noIPR;noIPR;noIPR;IPR013032;noIPR;noIPR;noIPR;noIPR;noIPR;noIPR;noIPR;noIPR;IPR000742;IPR000742;IPR000742;IPR000742;IPR000742;IPR000742;IPR000742;IPR001791;IPR000742;IPR000742;IPR000742;IPR000742;IPR000742;IPR000742;IPR000742;IPR000742;IPR000742;IPR00…
TRINITY_DN100297_c2_g1_i1	ras-related protein Rab-21-like	514	1	1.3E-40	77.30%	gi|585668272|ref|XP_002735512.2|PREDICTED: ras-related protein Rab-21-like [Saccoglossus kowalevskii]	Saccoglossus kowalevskii	EC:3.6.1.15	Nucleoside-triphosphate phosphatase	noIPR;IPR005225;IPR001806;noIPR;noIPR;noIPR;noIPR;noIPR;IPR027417
TRINITY_DN100297_c2_g1_i3	ras-related protein Rab-31-like isoform X1	2611	1	1.7E-45	72.13%	gi|913296729|ref|XP_013185593.1|PREDICTED: ras-related protein Rab-31-like isoform X1 [Amyelois transitella]	Amyelois transitella	EC:3.6.1.15	Nucleoside-triphosphate phosphatase	noIPR;noIPR;IPR005225;IPR001806;noIPR;noIPR;noIPR;noIPR;IPR027417
TRINITY_DN100297_c2_g1_i4	ras-related protein Rab-21-like	2629	1	1.1E-42	78.00%	gi|585668272|ref|XP_002735512.2|PREDICTED: ras-related protein Rab-21-like [Saccoglossus kowalevskii]	Saccoglossus kowalevskii	EC:3.6.1.15	Nucleoside-triphosphate phosphatase	noIPR;IPR001806;noIPR;IPR005225;noIPR;noIPR;noIPR;noIPR;IPR027417
TRINITY_DN100299_c1_g1_i1	phosphatidylserine decarboxylase, putative	2625	1	4.6E-78	96.20%	gi|241146781|ref|XP_002405130.1|phosphatidylserine decarboxylase, putative [Ixodes scapularis]/gi|215493690|gb|EEC03331.1| phosphatidylserine decarboxylase, putative, partial [Ixodes scapularis]	Ixodes scapularis/Ixodes scapularis	EC:4.1.1.65	Phosphatidylserine decarboxylase	IPR033177;IPR003817;IPR003817;noIPR
TRINITY_DN100299_c1_g2_i1	phosphatidylserine decarboxylase proenzyme, mitochondrial-like isoform X1	592	1	5.0E-49	75.90%	gi|1316168604|ref|XP_023229693.1|phosphatidylserine decarboxylase proenzyme, mitochondrial-like isoform X1 [Centruroides sculpturatus]	Centruroides sculpturatus	EC:4.1.1.65	Phosphatidylserine decarboxylase	IPR003817;IPR003817;noIPR
TRINITY_DN100300_c0_g1_i3	AF435789_1ultrabithorax, partial	2073	1	4.6E-9	100.00%	gi|18307798|gb|AAL67688.1|AF435789_1ultrabithorax, partial [Folsomia candida]	Folsomia candida			IPR001356;noIPR;noIPR;noIPR;IPR001356;IPR001356;IPR009057
TRINITY_DN100303_c0_g1_i1	zinc finger CCCH domain-containing protein 13-like	5230	1	3.9E-20	70.80%	gi|1316168370|ref|XP_023229569.1|zinc finger CCCH domain-containing protein 13-like [Centruroides sculpturatus]	Centruroides sculpturatus			IPR000571;noIPR;noIPR;noIPR;noIPR;noIPR;noIPR;noIPR;noIPR;noIPR;noIPR;noIPR;noIPR;noIPR;noIPR;noIPR;noIPR;noIPR;noIPR;noIPR;noIPR;noIPR;noIPR;noIPR;noIPR;noIPR;noIPR;noIPR;IPR000571;IPR036855
TRINITY_DN100303_c0_g1_i3	zinc finger CCCH domain-containing protein 13-like	5242	1	3.9E-20	70.80%	gi|1316168370|ref|XP_023229569.1|zinc finger CCCH domain-containing protein 13-like [Centruroides sculpturatus]	Centruroides sculpturatus			IPR000571;noIPR;noIPR;noIPR;noIPR;noIPR;noIPR;noIPR;noIPR;noIPR;noIPR;noIPR;noIPR;noIPR;noIPR;noIPR;noIPR;noIPR;noIPR;noIPR;noIPR;noIPR;noIPR;noIPR;noIPR;noIPR;IPR000571;IPR036855
TRINITY_DN100304_c3_g1_i1	TPA_exp: mapmodulin-like protein	6447	1	5.0E-78	100.00%	gi|325303822|tpg|DAA34585.1|TPA_exp: mapmodulin-like protein [Amblyomma variegatum]	Amblyomma variegatum			noIPR;IPR032675;noIPR;noIPR;noIPR;noIPR;noIPR;IPR001611;IPR001611;IPR001611;IPR001611;noIPR
TRINITY_DN100304_c3_g1_i2	TPA_exp: mapmodulin-like protein	1987	1	5.9E-78	100.00%	gi|325303822|tpg|DAA34585.1|TPA_exp: mapmodulin-like protein [Amblyomma variegatum]	Amblyomma variegatum			IPR032675;noIPR;noIPR;noIPR;noIPR;noIPR;IPR001611;IPR001611;IPR001611;IPR001611;noIPR
TRINITY_DN100304_c3_g1_i3	TPA_exp: mapmodulin-like protein	6411	1	1.2E-74	100.00%	gi|325303822|tpg|DAA34585.1|TPA_exp: mapmodulin-like protein [Amblyomma variegatum]	Amblyomma variegatum			IPR032675;noIPR;noIPR;noIPR;noIPR;noIPR;noIPR;IPR001611;IPR001611;IPR001611;IPR001611;noIPR
TRINITY_DN100305_c1_g1_i2	uncharacterized protein LOC109864128	1059	1	2.2E-7	54.67%	gi|1153710764|ref|XP_020300633.1|uncharacterized protein LOC109864128 [Pseudomyrmex gracilis]	Pseudomyrmex gracilis			IPR002557;noIPR;noIPR;IPR002557;IPR036508
TRINITY_DN100305_c1_g1_i3	LOW QUALITY PROTEIN: uncharacterized protein LOC111618021	683	1	6.4E-8	63.04%	gi|1316140538|ref|XP_023215207.1|LOW QUALITY PROTEIN: uncharacterized protein LOC111618021 [Centruroides sculpturatus]	Centruroides sculpturatus			noIPR;IPR002557;noIPR;IPR002557;IPR036508
TRINITY_DN100305_c1_g1_i4	LOW QUALITY PROTEIN: uncharacterized protein LOC111618021	1199	1	2.5E-7	60.87%	gi|1316140538|ref|XP_023215207.1|LOW QUALITY PROTEIN: uncharacterized protein LOC111618021 [Centruroides sculpturatus]	Centruroides sculpturatus			noIPR;IPR002557;noIPR;IPR002557;IPR036508
TRINITY_DN100305_c1_g1_i6	LOW QUALITY PROTEIN: uncharacterized protein LOC111618021	1370	1	2.9E-7	60.87%	gi|1316140538|ref|XP_023215207.1|LOW QUALITY PROTEIN: uncharacterized protein LOC111618021 [Centruroides sculpturatus]	Centruroides sculpturatus			noIPR;IPR002557;noIPR;IPR002557;IPR036508
TRINITY_DN100305_c1_g1_i7	LOW QUALITY PROTEIN: uncharacterized protein LOC111618021	509	1	1.1E-7	60.87%	gi|1316140538|ref|XP_023215207.1|LOW QUALITY PROTEIN: uncharacterized protein LOC111618021 [Centruroides sculpturatus]	Centruroides sculpturatus			noIPR;IPR002557;IPR002557;IPR036508
TRINITY_DN100306_c3_g1_i1	hypothetical protein IscW_ISCW003746	2692	1	2.3E-45	87.50%	gi|241289562|ref|XP_002407101.1|hypothetical protein IscW_ISCW003746 [Ixodes scapularis]/gi|215496985|gb|EEC06625.1| hypothetical protein IscW_ISCW003746 [Ixodes scapularis]	Ixodes scapularis/Ixodes scapularis			noIPR;noIPR
TRINITY_DN100306_c3_g1_i2	hypothetical protein IscW_ISCW003746	2680	1	2.3E-45	87.50%	gi|241289562|ref|XP_002407101.1|hypothetical protein IscW_ISCW003746 [Ixodes scapularis]/gi|215496985|gb|EEC06625.1| hypothetical protein IscW_ISCW003746 [Ixodes scapularis]	Ixodes scapularis/Ixodes scapularis			noIPR;noIPR
TRINITY_DN100306_c3_g1_i3	hypothetical protein IscW_ISCW003746	2692	1	2.3E-45	87.50%	gi|241289562|ref|XP_002407101.1|hypothetical protein IscW_ISCW003746 [Ixodes scapularis]/gi|215496985|gb|EEC06625.1| hypothetical protein IscW_ISCW003746 [Ixodes scapularis]	Ixodes scapularis/Ixodes scapularis			noIPR;noIPR
TRINITY_DN100307_c3_g2_i1	polypeptide N-acetylgalactosaminyltransferase 13-like	4559	1	1.0E-258	87.41%	gi|926615312|ref|XP_013772731.1|polypeptide N-acetylgalactosaminyltransferase 13-like [Limulus polyphemus]/gi|1238841775|ref|XP_022239577.1| polypeptide N-acetylgalactosaminyltransferase 13-like [Limulus polyphemus]/gi|1238841777|ref|XP_022239578.1| polypeptide N-acetylgalactosaminyltransferase 13-like [Limulus polyphemus]	Limulus polyphemus/Limulus polyphemus/Limulus polyphemus			IPR000772;IPR029044;noIPR;IPR001173;noIPR;noIPR;IPR000772;noIPR;IPR000772;IPR029044;IPR035992
TRINITY_DN100307_c3_g2_i2	polypeptide N-acetylgalactosaminyltransferase 13-like	4557	1	1.0E-258	87.41%	gi|926615312|ref|XP_013772731.1|polypeptide N-acetylgalactosaminyltransferase 13-like [Limulus polyphemus]/gi|1238841775|ref|XP_022239577.1| polypeptide N-acetylgalactosaminyltransferase 13-like [Limulus polyphemus]/gi|1238841777|ref|XP_022239578.1| polypeptide N-acetylgalactosaminyltransferase 13-like [Limulus polyphemus]	Limulus polyphemus/Limulus polyphemus/Limulus polyphemus			IPR000772;IPR029044;noIPR;IPR001173;noIPR;noIPR;IPR000772;noIPR;IPR000772;IPR029044;IPR035992
TRINITY_DN100308_c1_g2_i1	gag protein	1464	1	1.1E-49	58.06%	gi|599127502|gb|AHN53425.1|gag protein, partial [Nuttalliella namaqua]	Nuttalliella namaqua			IPR005162;noIPR;noIPR;noIPR;noIPR
TRINITY_DN100308_c1_g2_i4	gag protein	1333	1	4.1E-51	57.19%	gi|599127502|gb|AHN53425.1|gag protein, partial [Nuttalliella namaqua]	Nuttalliella namaqua			IPR005162;noIPR;noIPR;noIPR;noIPR;noIPR
TRINITY_DN100308_c1_g2_i5	gag protein	913	1	7.5E-20	54.21%	gi|599127502|gb|AHN53425.1|gag protein, partial [Nuttalliella namaqua]	Nuttalliella namaqua			noIPR;noIPR;noIPR
TRINITY_DN100308_c1_g2_i6	gag protein	888	1	2.3E-13	54.25%	gi|599127502|gb|AHN53425.1|gag protein, partial [Nuttalliella namaqua]	Nuttalliella namaqua			noIPR
TRINITY_DN100308_c2_g2_i4	reverse transcriptase/ribonuclease H	814	1	3.8E-23	67.48%	gi|599127500|gb|AHN53424.1|reverse transcriptase/ribonuclease H, partial [Nuttalliella namaqua]	Nuttalliella namaqua			noIPR;noIPR;noIPR;noIPR;noIPR
TRINITY_DN100308_c2_g3_i1	integrase, partial	1695	1	8.8E-99	73.26%	gi|599127512|gb|AHN53430.1|integrase, partial [Nuttalliella namaqua]	Nuttalliella namaqua			noIPR;IPR001584;IPR041588;IPR036397;noIPR;IPR001584;IPR012337
TRINITY_DN100308_c2_g3_i4	integrase, partial	1152	1	7.8E-99	73.26%	gi|599127512|gb|AHN53430.1|integrase, partial [Nuttalliella namaqua]	Nuttalliella namaqua			noIPR;IPR001584;IPR041588;IPR036397;noIPR;IPR001584;IPR012337
TRINITY_DN100308_c2_g3_i5	reverse transcriptase/ribonuclease H	1091	1	8.0E-37	74.81%	gi|599127500|gb|AHN53424.1|reverse transcriptase/ribonuclease H, partial [Nuttalliella namaqua]	Nuttalliella namaqua			noIPR;IPR041577;noIPR;noIPR;noIPR
TRINITY_DN100309_c1_g2_i2	RNA-directed RNA polymerase, putative	667	1	2.7E-11	90.00%	gi|241997884|ref|XP_002433585.1|RNA-directed RNA polymerase, putative [Ixodes scapularis]/gi|215495344|gb|EEC04985.1| RNA-directed RNA polymerase, putative, partial [Ixodes scapularis]	Ixodes scapularis/Ixodes scapularis	EC:2.7.7.48	RNA-directed RNA polymerase
TRINITY_DN100309_c1_g2_i3	RNA-directed RNA polymerase, putative	674	1	1.2E-11	88.10%	gi|241997884|ref|XP_002433585.1|RNA-directed RNA polymerase, putative [Ixodes scapularis]/gi|215495344|gb|EEC04985.1| RNA-directed RNA polymerase, putative, partial [Ixodes scapularis]	Ixodes scapularis/Ixodes scapularis	EC:2.7.7.48	RNA-directed RNA polymerase	noIPR
TRINITY_DN100310_c0_g1_i1	tyrosine-protein kinase Abl isoform X1	1143	1	2.4E-7	82.35%	gi|1009543343|ref|XP_015907801.1|tyrosine-protein kinase Abl isoform X1 [Parasteatoda tepidariorum]	Parasteatoda tepidariorum			noIPR;noIPR
TRINITY_DN100310_c0_g2_i1	tyrosine-protein kinase Abl-like	4427	1	0.0E0	61.55%	gi|926622049|ref|XP_013776391.1|tyrosine-protein kinase Abl-like [Limulus polyphemus]	Limulus polyphemus	EC:2.7.10;EC:2.7.10.2	Transferring phosphorus-containing groups;Non-specific protein-tyrosine kinase	IPR001452;IPR000980;IPR001245;noIPR;IPR015015;IPR001245;IPR000980;IPR036860;IPR001452;noIPR;noIPR;noIPR;noIPR;noIPR;noIPR;noIPR;noIPR;noIPR;noIPR;noIPR;noIPR;noIPR;noIPR;noIPR;noIPR;noIPR;noIPR;noIPR;noIPR;noIPR;IPR033221;IPR000719;IPR000980;IPR001452;IPR035837;noIPR;noIPR;IPR036860;IPR011009;IPR036028
TRINITY_DN100310_c0_g2_i2	tyrosine-protein kinase Abl isoform X2	4500	1	2.3E-271	87.11%	gi|1009543345|ref|XP_015907802.1|tyrosine-protein kinase Abl isoform X2 [Parasteatoda tepidariorum]	Parasteatoda tepidariorum	EC:2.7.10	Transferring phosphorus-containing groups	IPR000980;IPR001452;IPR001245;noIPR;IPR001452;IPR036860;noIPR;IPR001245;IPR000980;noIPR;noIPR;noIPR;noIPR;noIPR;IPR033221;IPR000719;IPR000980;IPR001452;IPR035837;noIPR;noIPR;IPR036860;IPR011009;IPR036028
TRINITY_DN100310_c0_g2_i3	tyrosine-protein kinase Abl isoform X2	4428	1	1.5E-294	79.70%	gi|1009543345|ref|XP_015907802.1|tyrosine-protein kinase Abl isoform X2 [Parasteatoda tepidariorum]	Parasteatoda tepidariorum	EC:2.7.10	Transferring phosphorus-containing groups	IPR000980;IPR001245;IPR001452;noIPR;noIPR;IPR000980;noIPR;IPR001245;IPR036860;IPR001452;noIPR;noIPR;noIPR;noIPR;noIPR;noIPR;noIPR;IPR033221;IPR000719;IPR000980;IPR001452;IPR035837;noIPR;noIPR;IPR036860;IPR011009;IPR036028
TRINITY_DN100311_c3_g1_i1	armadillo repeat protein, putative	2489	1	1.8E-52	91.49%	gi|241815518|ref|XP_002416547.1|armadillo repeat protein, putative [Ixodes scapularis]/gi|215511011|gb|EEC20464.1| armadillo repeat protein, putative [Ixodes scapularis]	Ixodes scapularis/Ixodes scapularis			noIPR;noIPR;noIPR;noIPR;IPR028435;IPR028446
TRINITY_DN100311_c3_g1_i3	armadillo repeat protein, putative	5344	1	9.0E-307	71.57%	gi|241815518|ref|XP_002416547.1|armadillo repeat protein, putative [Ixodes scapularis]/gi|215511011|gb|EEC20464.1| armadillo repeat protein, putative [Ixodes scapularis]	Ixodes scapularis/Ixodes scapularis			IPR000225;IPR011989;noIPR;noIPR;noIPR;noIPR;noIPR;noIPR;noIPR;noIPR;noIPR;noIPR;noIPR;IPR028435;IPR028435;IPR028446;IPR000225;IPR000225;IPR000225;IPR016024
TRINITY_DN100311_c3_g1_i4	armadillo repeat protein, putative	6277	1	8.1E-307	71.63%	gi|241815518|ref|XP_002416547.1|armadillo repeat protein, putative [Ixodes scapularis]/gi|215511011|gb|EEC20464.1| armadillo repeat protein, putative [Ixodes scapularis]	Ixodes scapularis/Ixodes scapularis			IPR011989;IPR000225;noIPR;noIPR;noIPR;noIPR;noIPR;noIPR;noIPR;noIPR;noIPR;noIPR;noIPR;noIPR;noIPR;IPR028446;IPR028435;IPR028435;IPR000225;IPR000225;IPR000225;IPR016024
TRINITY_DN100311_c3_g1_i7	armadillo repeat protein, putative	5190	1	6.7E-307	71.63%	gi|241815518|ref|XP_002416547.1|armadillo repeat protein, putative [Ixodes scapularis]/gi|215511011|gb|EEC20464.1| armadillo repeat protein, putative [Ixodes scapularis]	Ixodes scapularis/Ixodes scapularis			IPR011989;IPR000225;noIPR;noIPR;noIPR;noIPR;noIPR;noIPR;noIPR;noIPR;noIPR;noIPR;noIPR;noIPR;IPR028446;IPR028446;IPR028435;IPR028435;IPR000225;IPR000225;IPR000225;IPR016024
TRINITY_DN100313_c3_g1_i2	pol polyprotein	662	1	1.3E-61	71.63%	gi|599127480|gb|AHN53418.1|pol polyprotein [Nuttalliella namaqua]	Nuttalliella namaqua			IPR041588;IPR001584;IPR036397;noIPR;IPR001584;IPR012337
TRINITY_DN100314_c4_g1_i1	sodium-dependent multivitamin transporter, putative	682	1	2.8E-35	63.64%	gi|241862862|ref|XP_002416407.1|sodium-dependent multivitamin transporter, putative [Ixodes scapularis]/gi|215510621|gb|EEC20074.1| sodium-dependent multivitamin transporter, putative [Ixodes scapularis]	Ixodes scapularis/Ixodes scapularis			IPR038377;IPR001734;noIPR;noIPR;IPR001734
TRINITY_DN100314_c4_g1_i10	sodium-dependent multivitamin transporter, putative	603	1	2.6E-13	60.71%	gi|241813122|ref|XP_002414629.1|sodium-dependent multivitamin transporter, putative [Ixodes scapularis]/gi|215508840|gb|EEC18294.1| sodium-dependent multivitamin transporter, putative [Ixodes scapularis]	Ixodes scapularis/Ixodes scapularis			IPR038377;noIPR;noIPR;IPR001734
TRINITY_DN100314_c4_g1_i11	sodium-dependent multivitamin transporter, putative	4141	1	4.8E-58	64.47%	gi|241862862|ref|XP_002416407.1|sodium-dependent multivitamin transporter, putative [Ixodes scapularis]/gi|215510621|gb|EEC20074.1| sodium-dependent multivitamin transporter, putative [Ixodes scapularis]	Ixodes scapularis/Ixodes scapularis			IPR001734;IPR001734;IPR038377;noIPR;IPR001734
TRINITY_DN100314_c4_g1_i3	sodium-dependent multivitamin transporter, putative	761	1	3.3E-13	60.71%	gi|241813122|ref|XP_002414629.1|sodium-dependent multivitamin transporter, putative [Ixodes scapularis]/gi|215508840|gb|EEC18294.1| sodium-dependent multivitamin transporter, putative [Ixodes scapularis]	Ixodes scapularis/Ixodes scapularis			IPR038377;noIPR;noIPR;IPR001734
TRINITY_DN100314_c4_g1_i4	sodium-dependent multivitamin transporter, putative	1122	1	2.4E-44	63.56%	gi|241862862|ref|XP_002416407.1|sodium-dependent multivitamin transporter, putative [Ixodes scapularis]/gi|215510621|gb|EEC20074.1| sodium-dependent multivitamin transporter, putative [Ixodes scapularis]	Ixodes scapularis/Ixodes scapularis			IPR001734;IPR038377;noIPR;noIPR;IPR001734
TRINITY_DN100314_c4_g1_i5	sodium-dependent multivitamin transporter, putative	682	1	1.7E-13	60.71%	gi|241813122|ref|XP_002414629.1|sodium-dependent multivitamin transporter, putative [Ixodes scapularis]/gi|215508840|gb|EEC18294.1| sodium-dependent multivitamin transporter, putative [Ixodes scapularis]	Ixodes scapularis/Ixodes scapularis			IPR038377;noIPR;noIPR;IPR001734
TRINITY_DN100314_c4_g1_i6	sodium-dependent multivitamin transporter, putative	851	1	3.4E-35	63.64%	gi|241862862|ref|XP_002416407.1|sodium-dependent multivitamin transporter, putative [Ixodes scapularis]/gi|215510621|gb|EEC20074.1| sodium-dependent multivitamin transporter, putative [Ixodes scapularis]	Ixodes scapularis/Ixodes scapularis			IPR038377;IPR001734;noIPR;noIPR;IPR001734
TRINITY_DN100314_c4_g1_i7	sodium-dependent multivitamin transporter, putative	598	1	1.5E-13	60.71%	gi|241813122|ref|XP_002414629.1|sodium-dependent multivitamin transporter, putative [Ixodes scapularis]/gi|215508840|gb|EEC18294.1| sodium-dependent multivitamin transporter, putative [Ixodes scapularis]	Ixodes scapularis/Ixodes scapularis			IPR038377;noIPR;noIPR;IPR001734
TRINITY_DN100314_c4_g1_i8	sodium-dependent multivitamin transporter, putative	851	1	3.4E-35	63.64%	gi|241862862|ref|XP_002416407.1|sodium-dependent multivitamin transporter, putative [Ixodes scapularis]/gi|215510621|gb|EEC20074.1| sodium-dependent multivitamin transporter, putative [Ixodes scapularis]	Ixodes scapularis/Ixodes scapularis			IPR038377;IPR001734;noIPR;noIPR;IPR001734
TRINITY_DN100314_c4_g1_i9	sodium-dependent multivitamin transporter, putative	4012	1	4.7E-58	64.47%	gi|241862862|ref|XP_002416407.1|sodium-dependent multivitamin transporter, putative [Ixodes scapularis]/gi|215510621|gb|EEC20074.1| sodium-dependent multivitamin transporter, putative [Ixodes scapularis]	Ixodes scapularis/Ixodes scapularis			IPR001734;IPR001734;IPR038377;noIPR;IPR001734
TRINITY_DN100315_c9_g1_i1	transposase, putative	2992	1	4.1E-91	54.21%	gi|241818253|ref|XP_002416570.1|transposase, putative [Ixodes scapularis]/gi|215511034|gb|EEC20487.1| transposase, putative [Ixodes scapularis]	Ixodes scapularis/Ixodes scapularis			IPR021896;noIPR;noIPR;noIPR
TRINITY_DN100315_c9_g1_i3	transposase, putative	3509	1	4.8E-91	54.21%	gi|241818253|ref|XP_002416570.1|transposase, putative [Ixodes scapularis]/gi|215511034|gb|EEC20487.1| transposase, putative [Ixodes scapularis]	Ixodes scapularis/Ixodes scapularis			IPR021896;noIPR;noIPR;noIPR
TRINITY_DN100315_c9_g1_i4	transposase, putative	3052	1	4.2E-91	54.21%	gi|241818253|ref|XP_002416570.1|transposase, putative [Ixodes scapularis]/gi|215511034|gb|EEC20487.1| transposase, putative [Ixodes scapularis]	Ixodes scapularis/Ixodes scapularis			IPR038441;IPR021896;IPR006612;noIPR;noIPR;noIPR;IPR006612;noIPR
TRINITY_DN100317_c5_g2_i5	pol polyprotein	762	1	7.4E-29	64.71%	gi|599127480|gb|AHN53418.1|pol polyprotein [Nuttalliella namaqua]	Nuttalliella namaqua			noIPR;IPR041588;noIPR
TRINITY_DN100317_c5_g2_i6	pol polyprotein	526	1	2.5E-28	63.19%	gi|599127480|gb|AHN53418.1|pol polyprotein [Nuttalliella namaqua]	Nuttalliella namaqua			noIPR;IPR041588;noIPR
TRINITY_DN100317_c5_g2_i8	pol polyprotein	746	1	5.5E-29	64.71%	gi|599127480|gb|AHN53418.1|pol polyprotein [Nuttalliella namaqua]	Nuttalliella namaqua			IPR041588;noIPR;noIPR
TRINITY_DN100318_c2_g1_i10	conserved hypothetical protein	1043	1	5.7E-16	61.74%	gi|241621292|ref|XP_002407313.1|conserved hypothetical protein [Ixodes scapularis]/gi|215500971|gb|EEC10465.1| conserved hypothetical protein [Ixodes scapularis]	Ixodes scapularis/Ixodes scapularis			IPR025714;noIPR
TRINITY_DN100318_c2_g1_i12	conserved hypothetical protein	1117	1	6.1E-16	61.74%	gi|241621292|ref|XP_002407313.1|conserved hypothetical protein [Ixodes scapularis]/gi|215500971|gb|EEC10465.1| conserved hypothetical protein [Ixodes scapularis]	Ixodes scapularis/Ixodes scapularis			IPR025714;noIPR
TRINITY_DN100318_c2_g1_i14	conserved hypothetical protein	1012	1	1.1E-19	60.74%	gi|241621292|ref|XP_002407313.1|conserved hypothetical protein [Ixodes scapularis]/gi|215500971|gb|EEC10465.1| conserved hypothetical protein [Ixodes scapularis]	Ixodes scapularis/Ixodes scapularis			IPR025714;noIPR
TRINITY_DN100318_c2_g1_i4	conserved hypothetical protein	1086	1	1.2E-19	60.74%	gi|241621292|ref|XP_002407313.1|conserved hypothetical protein [Ixodes scapularis]/gi|215500971|gb|EEC10465.1| conserved hypothetical protein [Ixodes scapularis]	Ixodes scapularis/Ixodes scapularis			IPR025714;noIPR
TRINITY_DN100318_c2_g1_i5	conserved hypothetical protein	525	1	1.3E-29	65.56%	gi|241621292|ref|XP_002407313.1|conserved hypothetical protein [Ixodes scapularis]/gi|215500971|gb|EEC10465.1| conserved hypothetical protein [Ixodes scapularis]	Ixodes scapularis/Ixodes scapularis			IPR025714;noIPR
TRINITY_DN100318_c2_g1_i7	conserved hypothetical protein	2346	1	2.5E-19	60.74%	gi|241621292|ref|XP_002407313.1|conserved hypothetical protein [Ixodes scapularis]/gi|215500971|gb|EEC10465.1| conserved hypothetical protein [Ixodes scapularis]	Ixodes scapularis/Ixodes scapularis			IPR025714;noIPR
TRINITY_DN100318_c2_g1_i9	conserved hypothetical protein	2647	1	2.8E-19	60.74%	gi|241621292|ref|XP_002407313.1|conserved hypothetical protein [Ixodes scapularis]/gi|215500971|gb|EEC10465.1| conserved hypothetical protein [Ixodes scapularis]	Ixodes scapularis/Ixodes scapularis			IPR025714;noIPR
TRINITY_DN100319_c4_g1_i5	uncharacterized protein LOC106476559	4784	1	3.8E-139	58.55%	gi|926652204|ref|XP_013792662.1|uncharacterized protein LOC106476559 [Limulus polyphemus]	Limulus polyphemus			IPR004245;IPR017849;noIPR;IPR004245;IPR004245;IPR017850
TRINITY_DN100319_c4_g1_i6	uncharacterized protein LOC106476559	2223	1	9.9E-66	64.39%	gi|926652204|ref|XP_013792662.1|uncharacterized protein LOC106476559 [Limulus polyphemus]	Limulus polyphemus			IPR004245;noIPR;IPR004245
TRINITY_DN100319_c4_g1_i9	uncharacterized protein LOC106476559	4802	1	3.8E-139	58.55%	gi|926652204|ref|XP_013792662.1|uncharacterized protein LOC106476559 [Limulus polyphemus]	Limulus polyphemus			IPR004245;IPR017849;noIPR;IPR004245;IPR004245;IPR017850
TRINITY_DN100321_c2_g1_i2	PREDICTED: uncharacterized protein LOC109099165	1974	1	6.8E-10	55.81%	gi|1101607750|ref|XP_018968246.1|PREDICTED: uncharacterized protein LOC109099165 [Cyprinus carpio]	Cyprinus carpio
TRINITY_DN100321_c2_g1_i3	PREDICTED: uncharacterized protein LOC109099165	1749	1	1.2E-10	55.81%	gi|1101607750|ref|XP_018968246.1|PREDICTED: uncharacterized protein LOC109099165 [Cyprinus carpio]	Cyprinus carpio
TRINITY_DN100322_c1_g1_i10	uncharacterized protein NKAPD1-like	2205	1	1.5E-18	61.29%	gi|1316143518|ref|XP_023216767.1|uncharacterized protein NKAPD1-like [Centruroides sculpturatus]/gi|1316143520|ref|XP_023216768.1| uncharacterized protein NKAPD1-like [Centruroides sculpturatus]/gi|1316143522|ref|XP_023216769.1| uncharacterized protein NKAPD1-like [Centruroides sculpturatus]	Centruroides sculpturatus/Centruroides sculpturatus/Centruroides sculpturatus			noIPR;noIPR;noIPR;noIPR;noIPR;noIPR;noIPR
TRINITY_DN100322_c1_g1_i4	uncharacterized protein NKAPD1-like	2218	1	1.5E-18	61.29%	gi|1316143518|ref|XP_023216767.1|uncharacterized protein NKAPD1-like [Centruroides sculpturatus]/gi|1316143520|ref|XP_023216768.1| uncharacterized protein NKAPD1-like [Centruroides sculpturatus]/gi|1316143522|ref|XP_023216769.1| uncharacterized protein NKAPD1-like [Centruroides sculpturatus]	Centruroides sculpturatus/Centruroides sculpturatus/Centruroides sculpturatus			noIPR;noIPR;noIPR;noIPR;noIPR;noIPR;noIPR
TRINITY_DN100323_c0_g1_i1	endonuclease/reverse transcriptase, putative	661	1	5.1E-10	60.44%	gi|242002024|ref|XP_002435655.1|endonuclease/reverse transcriptase, putative [Ixodes scapularis]/gi|215498991|gb|EEC08485.1| endonuclease/reverse transcriptase, putative [Ixodes scapularis]	Ixodes scapularis/Ixodes scapularis			noIPR;noIPR
TRINITY_DN100323_c0_g1_i2	endonuclease/reverse transcriptase, putative	661	1	1.1E-7	57.14%	gi|242002024|ref|XP_002435655.1|endonuclease/reverse transcriptase, putative [Ixodes scapularis]/gi|215498991|gb|EEC08485.1| endonuclease/reverse transcriptase, putative [Ixodes scapularis]	Ixodes scapularis/Ixodes scapularis
TRINITY_DN100323_c2_g1_i2	vesicle-associated membrane protein 4-like isoform X1	1166	1	1.4E-31	82.20%	gi|926653995|ref|XP_013793616.1|vesicle-associated membrane protein 4-like isoform X1 [Limulus polyphemus]	Limulus polyphemus			IPR001388;noIPR;IPR001388;noIPR;noIPR;noIPR;IPR001388;noIPR
TRINITY_DN100323_c2_g1_i3	vesicle-associated membrane protein 4-like isoform X1	1218	1	1.5E-31	83.92%	gi|926653995|ref|XP_013793616.1|vesicle-associated membrane protein 4-like isoform X1 [Limulus polyphemus]	Limulus polyphemus			IPR001388;IPR001388;IPR016444;noIPR;noIPR;noIPR;noIPR;IPR001388;noIPR
TRINITY_DN100324_c5_g2_i1	pol polyprotein	774	1	6.6E-9	73.68%	gi|599127480|gb|AHN53418.1|pol polyprotein [Nuttalliella namaqua]	Nuttalliella namaqua
TRINITY_DN100325_c4_g1_i1	acetyltransferase, putative	812	1	5.2E-65	81.62%	gi|241614084|ref|XP_002407491.1|acetyltransferase, putative [Ixodes scapularis]/gi|215502824|gb|EEC12318.1| acetyltransferase, putative [Ixodes scapularis]	Ixodes scapularis/Ixodes scapularis	EC:2.3.1.5;EC:2.3.1.4	Arylamine N-acetyltransferase;Glucosamine-phosphate N-acetyltransferase	IPR000182;noIPR;noIPR;IPR039143;IPR000182;noIPR;IPR016181
TRINITY_DN100325_c4_g1_i2	acetyltransferase, putative	689	1	2.4E-34	78.26%	gi|241614084|ref|XP_002407491.1|acetyltransferase, putative [Ixodes scapularis]/gi|215502824|gb|EEC12318.1| acetyltransferase, putative [Ixodes scapularis]	Ixodes scapularis/Ixodes scapularis	EC:2.3.1.5;EC:2.3.1.4	Arylamine N-acetyltransferase;Glucosamine-phosphate N-acetyltransferase	noIPR;IPR039143;noIPR
TRINITY_DN100325_c4_g1_i4	acetyltransferase, putative	1069	1	2.0E-8	78.00%	gi|241614084|ref|XP_002407491.1|acetyltransferase, putative [Ixodes scapularis]/gi|215502824|gb|EEC12318.1| acetyltransferase, putative [Ixodes scapularis]	Ixodes scapularis/Ixodes scapularis	EC:2.3.1.5;EC:2.3.1.4	Arylamine N-acetyltransferase;Glucosamine-phosphate N-acetyltransferase	noIPR;IPR039143;noIPR
TRINITY_DN100325_c4_g1_i7	acetyltransferase, putative	716	1	7.1E-66	81.82%	gi|241614084|ref|XP_002407491.1|acetyltransferase, putative [Ixodes scapularis]/gi|215502824|gb|EEC12318.1| acetyltransferase, putative [Ixodes scapularis]	Ixodes scapularis/Ixodes scapularis	EC:2.3.1.5;EC:2.3.1.4	Arylamine N-acetyltransferase;Glucosamine-phosphate N-acetyltransferase	IPR000182;noIPR;noIPR;IPR039143;IPR000182;noIPR;IPR016181
TRINITY_DN100326_c2_g1_i2	AF369891_4endonuclease/reverse transcriptase	4217	1	5.5E-134	51.35%	gi|17529698|gb|AAL40415.1|AF369891_4endonuclease/reverse transcriptase [Branchiostoma floridae]	Branchiostoma floridae			IPR005135;IPR000477;IPR036691;noIPR;IPR000477;noIPR;IPR036691;noIPR
TRINITY_DN100326_c2_g1_i3	AF369891_4endonuclease/reverse transcriptase	3714	1	1.5E-122	50.59%	gi|17529698|gb|AAL40415.1|AF369891_4endonuclease/reverse transcriptase [Branchiostoma floridae]	Branchiostoma floridae			IPR036691;IPR000477;IPR005135;noIPR;IPR000477;noIPR;IPR036691;noIPR
TRINITY_DN100326_c2_g1_i4	PREDICTED: uncharacterized protein LOC105851037	778	1	3.0E-9	51.33%	gi|828196117|ref|XP_012567187.1|PREDICTED: uncharacterized protein LOC105851037 [Hydra vulgaris]	Hydra vulgaris			IPR036691;IPR036691
TRINITY_DN100327_c1_g1_i1	ubiquitin-conjugating enzyme E2 H-like	3063	1	3.9E-89	96.69%	gi|926640707|ref|XP_013786462.1|ubiquitin-conjugating enzyme E2 H-like [Limulus polyphemus]	Limulus polyphemus			IPR000608;IPR016135;noIPR;noIPR;noIPR;IPR000608;IPR000608;IPR016135
TRINITY_DN100327_c1_g1_i2	ubiquitin-conjugating enzyme E2 H-like	3077	1	3.9E-89	96.69%	gi|926640707|ref|XP_013786462.1|ubiquitin-conjugating enzyme E2 H-like [Limulus polyphemus]	Limulus polyphemus			IPR000608;IPR016135;noIPR;noIPR;noIPR;IPR000608;IPR000608;IPR016135
TRINITY_DN100327_c1_g1_i4	ubiquitin-conjugating enzyme E2 H-like	3077	1	3.9E-89	96.69%	gi|926640707|ref|XP_013786462.1|ubiquitin-conjugating enzyme E2 H-like [Limulus polyphemus]	Limulus polyphemus			IPR000608;IPR016135;noIPR;noIPR;noIPR;IPR000608;IPR000608;IPR016135
TRINITY_DN100327_c1_g1_i5	ubiquitin-conjugating enzyme E2 H-like	3078	1	3.9E-89	96.69%	gi|926640707|ref|XP_013786462.1|ubiquitin-conjugating enzyme E2 H-like [Limulus polyphemus]	Limulus polyphemus			IPR000608;IPR016135;noIPR;noIPR;noIPR;IPR000608;IPR000608;IPR016135
TRINITY_DN100330_c4_g1_i1	dehydrogenase, putative	537	1	9.5E-31	78.51%	gi|241837605|ref|XP_002415185.1|dehydrogenase, putative [Ixodes scapularis]/gi|215509397|gb|EEC18850.1| dehydrogenase, putative, partial [Ixodes scapularis]	Ixodes scapularis/Ixodes scapularis			IPR002347;noIPR;IPR002347;noIPR;noIPR;IPR036291
TRINITY_DN100330_c5_g1_i1	retinol dehydrogenase 11-like	4842	1	3.9E-91	84.23%	gi|1173892148|gb|OQR69803.1|retinol dehydrogenase 11-like [Tropilaelaps mercedesae]	Tropilaelaps mercedesae			IPR002347;IPR002347;IPR002347;noIPR;noIPR;noIPR;IPR036291
TRINITY_DN100330_c5_g1_i2	retinol dehydrogenase 11-like	1359	1	5.4E-91	83.78%	gi|1173892148|gb|OQR69803.1|retinol dehydrogenase 11-like [Tropilaelaps mercedesae]	Tropilaelaps mercedesae			IPR002347;IPR002347;noIPR;IPR002347;noIPR;noIPR;IPR036291
TRINITY_DN100331_c2_g1_i1	kettin, putative	4330	1	0.0E0	93.98%	gi|241999170|ref|XP_002434228.1|kettin, putative [Ixodes scapularis]/gi|215495987|gb|EEC05628.1| kettin, putative [Ixodes scapularis]	Ixodes scapularis/Ixodes scapularis			IPR013783;IPR013098;IPR010939;IPR013783;IPR013783;noIPR;IPR007110;IPR007110;IPR007110;IPR007110;IPR007110;IPR007110;IPR007110;IPR007110;IPR007110;IPR007110;noIPR;noIPR;noIPR;noIPR;noIPR;noIPR;noIPR;noIPR;noIPR;IPR036179;IPR036179;IPR036179;IPR036179;IPR036179;IPR036179;IPR036179;IPR036179;IPR036179;IPR036179;IPR036179
TRINITY_DN100331_c2_g1_i2	kettin, putative	2390	1	3.2E-272	87.19%	gi|241999170|ref|XP_002434228.1|kettin, putative [Ixodes scapularis]/gi|215495987|gb|EEC05628.1| kettin, putative [Ixodes scapularis]	Ixodes scapularis/Ixodes scapularis			IPR013783;IPR013783;IPR013098;noIPR;noIPR;noIPR;noIPR;noIPR;IPR007110;IPR007110;IPR007110;IPR007110;noIPR;noIPR;noIPR;noIPR;IPR036179;IPR036179;IPR036179;IPR036179
TRINITY_DN100331_c2_g1_i3	kettin, putative	15261	1	0.0E0	92.54%	gi|241999170|ref|XP_002434228.1|kettin, putative [Ixodes scapularis]/gi|215495987|gb|EEC05628.1| kettin, putative [Ixodes scapularis]	Ixodes scapularis/Ixodes scapularis			IPR010939;IPR013783;IPR013783;IPR013783;IPR013783;IPR013783;IPR013783;IPR013098;noIPR;noIPR;noIPR;noIPR;noIPR;noIPR;IPR007110;IPR007110;IPR007110;IPR007110;IPR007110;IPR007110;IPR007110;IPR007110;IPR007110;IPR007110;IPR007110;IPR007110;IPR007110;IPR007110;IPR007110;IPR007110;IPR007110;IPR007110;IPR007110;IPR007110;IPR007110;IPR007110;IPR007110;IPR007110;IPR007110;IPR007110;IPR007110;IPR007110;IPR…
TRINITY_DN100331_c2_g1_i4	kettin, putative	5212	1	0.0E0	88.01%	gi|241999170|ref|XP_002434228.1|kettin, putative [Ixodes scapularis]/gi|215495987|gb|EEC05628.1| kettin, putative [Ixodes scapularis]	Ixodes scapularis/Ixodes scapularis			IPR013783;IPR013783;IPR013783;IPR013783;IPR013098;noIPR;noIPR;noIPR;noIPR;noIPR;IPR007110;IPR007110;IPR007110;IPR007110;IPR007110;IPR007110;IPR007110;IPR007110;noIPR;noIPR;noIPR;noIPR;noIPR;noIPR;noIPR;noIPR;IPR036179;IPR036179;IPR036179;IPR036179;IPR036179;IPR036179;IPR036179;IPR036179;IPR036179
TRINITY_DN100331_c2_g1_i5	kettin, putative	15264	1	0.0E0	92.54%	gi|241999170|ref|XP_002434228.1|kettin, putative [Ixodes scapularis]/gi|215495987|gb|EEC05628.1| kettin, putative [Ixodes scapularis]	Ixodes scapularis/Ixodes scapularis			IPR010939;IPR013783;IPR013783;IPR013783;IPR013783;IPR013783;IPR013783;IPR013098;noIPR;noIPR;noIPR;noIPR;noIPR;noIPR;IPR007110;IPR007110;IPR007110;IPR007110;IPR007110;IPR007110;IPR007110;IPR007110;IPR007110;IPR007110;IPR007110;IPR007110;IPR007110;IPR007110;IPR007110;IPR007110;IPR007110;IPR007110;IPR007110;IPR007110;IPR007110;IPR007110;IPR007110;IPR007110;IPR007110;IPR007110;IPR007110;IPR007110;IPR…
TRINITY_DN100332_c3_g3_i1	carboxypeptidase, putative	621	1	1.6E-77	78.26%	gi|241402209|ref|XP_002409689.1|carboxypeptidase, putative [Ixodes scapularis]/gi|215497512|gb|EEC07006.1| carboxypeptidase, putative, partial [Ixodes scapularis]	Ixodes scapularis/Ixodes scapularis	EC:3.4.17	Acting on peptide bonds (peptidases)	IPR000834;noIPR;noIPR;noIPR;noIPR;noIPR;noIPR;noIPR;IPR008969
TRINITY_DN100332_c3_g3_i2	carboxypeptidase, putative	545	1	7.5E-76	82.22%	gi|241402209|ref|XP_002409689.1|carboxypeptidase, putative [Ixodes scapularis]/gi|215497512|gb|EEC07006.1| carboxypeptidase, putative, partial [Ixodes scapularis]	Ixodes scapularis/Ixodes scapularis	EC:3.4.17	Acting on peptide bonds (peptidases)	noIPR;IPR000834;noIPR;noIPR;noIPR;noIPR;noIPR;IPR008969;noIPR
TRINITY_DN100332_c3_g4_i1	carboxypeptidase m, putative	766	1	1.3E-49	86.82%	gi|242000348|ref|XP_002434817.1|carboxypeptidase m, putative [Ixodes scapularis]/gi|215498147|gb|EEC07641.1| carboxypeptidase m, putative [Ixodes scapularis]	Ixodes scapularis/Ixodes scapularis	EC:3.4.17	Acting on peptide bonds (peptidases)	IPR000834;noIPR;IPR000834;noIPR;noIPR;noIPR
TRINITY_DN100333_c2_g1_i2	uncharacterized protein LOC111618738	2447	1	2.5E-38	57.88%	gi|1316142195|ref|XP_023216072.1|uncharacterized protein LOC111618738 [Centruroides sculpturatus]	Centruroides sculpturatus
TRINITY_DN100333_c2_g1_i3	uncharacterized protein LOC111618738	2447	1	2.5E-38	57.88%	gi|1316142195|ref|XP_023216072.1|uncharacterized protein LOC111618738 [Centruroides sculpturatus]	Centruroides sculpturatus
TRINITY_DN100335_c2_g1_i1	reverse transcriptase	3080	1	0.0E0	71.94%	gi|599127537|gb|AHN53443.1|reverse transcriptase, partial [Nuttalliella namaqua]	Nuttalliella namaqua			IPR000477;IPR041577;noIPR;noIPR;IPR041588;IPR036397;noIPR;noIPR;IPR001584;noIPR;noIPR;noIPR;IPR000477;IPR001584;noIPR;noIPR;IPR012337;noIPR
TRINITY_DN100336_c3_g1_i1	Down syndrome cell adhesion molecule-like protein 1 homolog	7001	1	0.0E0	67.34%	gi|1316138273|ref|XP_023244687.1|Down syndrome cell adhesion molecule-like protein 1 homolog [Centruroides sculpturatus]	Centruroides sculpturatus			noIPR;IPR013783;IPR013783;IPR013783;IPR013783;IPR003961;IPR013783;IPR013783;noIPR;IPR013783;IPR013783;IPR013098;IPR013783;IPR013783;IPR013783;IPR013783;IPR013783;noIPR;noIPR;noIPR;IPR007110;IPR003961;IPR007110;IPR003961;IPR007110;IPR007110;IPR007110;IPR003961;IPR007110;IPR007110;IPR007110;IPR003961;noIPR;IPR003961;noIPR;noIPR;IPR003961;noIPR;noIPR;IPR003961;IPR003961;IPR036179;IPR036179;IPR036179…
TRINITY_DN100336_c3_g1_i2	Down syndrome cell adhesion molecule-like protein 1 homolog	7016	1	0.0E0	67.26%	gi|1316138273|ref|XP_023244687.1|Down syndrome cell adhesion molecule-like protein 1 homolog [Centruroides sculpturatus]	Centruroides sculpturatus			noIPR;IPR013783;IPR013783;IPR013783;IPR013783;IPR013783;IPR013783;IPR013783;noIPR;IPR013098;IPR013783;IPR013783;IPR013783;IPR003961;IPR013783;IPR013783;IPR013783;noIPR;noIPR;noIPR;noIPR;noIPR;IPR007110;IPR003961;IPR007110;IPR003961;IPR007110;IPR007110;IPR007110;IPR003961;IPR007110;IPR007110;IPR007110;IPR003961;noIPR;IPR003961;noIPR;noIPR;IPR003961;noIPR;noIPR;IPR003961;IPR003961;IPR036179;IPR0361…
TRINITY_DN100336_c3_g1_i3	Down syndrome cell adhesion molecule-like protein 1 homolog	5820	1	0.0E0	67.34%	gi|1316138273|ref|XP_023244687.1|Down syndrome cell adhesion molecule-like protein 1 homolog [Centruroides sculpturatus]	Centruroides sculpturatus			noIPR;IPR013783;IPR013783;IPR013783;IPR013783;IPR003961;IPR013783;IPR013783;noIPR;IPR013783;IPR013783;IPR013098;IPR013783;IPR013783;IPR013783;IPR013783;IPR013783;noIPR;noIPR;noIPR;IPR007110;IPR003961;IPR007110;IPR003961;IPR007110;IPR007110;IPR007110;IPR003961;IPR007110;IPR007110;IPR007110;IPR003961;noIPR;IPR003961;noIPR;noIPR;IPR003961;noIPR;noIPR;IPR003961;IPR003961;IPR036179;IPR036179;IPR036179…
TRINITY_DN100338_c1_g1_i1	hypothetical protein IscW_ISCW013724	2285	1	3.1E-6	50.85%	gi|241839873|ref|XP_002415284.1|hypothetical protein IscW_ISCW013724 [Ixodes scapularis]/gi|215509496|gb|EEC18949.1| hypothetical protein IscW_ISCW013724, partial [Ixodes scapularis]	Ixodes scapularis/Ixodes scapularis
TRINITY_DN100338_c1_g1_i2	hypothetical protein IscW_ISCW013724	2285	1	8.2E-7	51.69%	gi|241839873|ref|XP_002415284.1|hypothetical protein IscW_ISCW013724 [Ixodes scapularis]/gi|215509496|gb|EEC18949.1| hypothetical protein IscW_ISCW013724, partial [Ixodes scapularis]	Ixodes scapularis/Ixodes scapularis
TRINITY_DN100339_c5_g1_i1	conserved hypothetical protein	5335	1	9.5E-107	56.92%	gi|241851112|ref|XP_002415749.1|conserved hypothetical protein [Ixodes scapularis]/gi|215509963|gb|EEC19416.1| conserved hypothetical protein [Ixodes scapularis]	Ixodes scapularis/Ixodes scapularis			noIPR;noIPR;noIPR;noIPR;noIPR;noIPR;noIPR;noIPR
TRINITY_DN100339_c5_g1_i2	conserved hypothetical protein	2312	1	7.0E-107	56.92%	gi|241851112|ref|XP_002415749.1|conserved hypothetical protein [Ixodes scapularis]/gi|215509963|gb|EEC19416.1| conserved hypothetical protein [Ixodes scapularis]	Ixodes scapularis/Ixodes scapularis			noIPR;noIPR;noIPR;noIPR;noIPR;noIPR;noIPR
TRINITY_DN100343_c1_g1_i1	protein FAM214A-like isoform X1	3920	1	2.3E-78	64.13%	gi|1316150041|ref|XP_023220169.1|protein FAM214A-like isoform X1 [Centruroides sculpturatus]/gi|1316150043|ref|XP_023220170.1| protein FAM214A-like isoform X2 [Centruroides sculpturatus]	Centruroides sculpturatus/Centruroides sculpturatus			noIPR;noIPR;noIPR;noIPR;noIPR;noIPR
TRINITY_DN100343_c2_g1_i1	hypothetical protein TSAR_012321	667	1	5.6E-25	57.93%	gi|1227095366|gb|OXU20465.1|hypothetical protein TSAR_012321 [Trichomalopsis sarcophagae]	Trichomalopsis sarcophagae			noIPR;noIPR
TRINITY_DN100343_c2_g1_i12	hypothetical protein TSAR_012321	959	1	2.5E-18	56.43%	gi|1227095366|gb|OXU20465.1|hypothetical protein TSAR_012321 [Trichomalopsis sarcophagae]	Trichomalopsis sarcophagae			IPR000467;noIPR;noIPR
TRINITY_DN100343_c2_g1_i2	G patch domain-containing protein 4	599	1	1.1E-11	65.33%	gi|665812510|ref|XP_008554771.1|PREDICTED: G patch domain-containing protein 4 [Microplitis demolitor]	Microplitis demolitor			IPR000467;noIPR;noIPR
TRINITY_DN100343_c2_g1_i5	hypothetical protein TSAR_012321	563	1	9.9E-31	59.22%	gi|1227095366|gb|OXU20465.1|hypothetical protein TSAR_012321 [Trichomalopsis sarcophagae]	Trichomalopsis sarcophagae			IPR000467;noIPR;noIPR;IPR000467
TRINITY_DN100343_c2_g1_i7	hypothetical protein TSAR_012321	1028	1	1.3E-23	58.06%	gi|1227095366|gb|OXU20465.1|hypothetical protein TSAR_012321 [Trichomalopsis sarcophagae]	Trichomalopsis sarcophagae			IPR000467;noIPR;noIPR;IPR000467
TRINITY_DN100344_c1_g1_i1	Down syndrome cell adhesion molecule-like protein Dscam2	3678	1	1.9E-260	60.49%	gi|1009592273|ref|XP_015925121.1|Down syndrome cell adhesion molecule-like protein Dscam2 [Parasteatoda tepidariorum]	Parasteatoda tepidariorum			noIPR;noIPR;IPR013098;IPR013783;IPR013783;IPR013783;IPR013783;IPR003961;IPR013783;IPR013783;IPR013783;IPR013783;IPR013783;IPR013783;noIPR;noIPR;noIPR;noIPR;IPR003961;IPR007110;IPR003961;IPR007110;IPR007110;IPR003961;IPR007110;IPR003961;noIPR;IPR003961;IPR003961;IPR003961;noIPR;IPR003961;IPR036179;IPR036179;IPR036116;IPR036179;IPR036179;IPR036179;IPR036179;IPR036116
TRINITY_DN100344_c1_g1_i10	Down syndrome cell adhesion molecule-like protein Dscam2	2198	1	1.6E-92	55.52%	gi|1316203437|ref|XP_023212047.1|Down syndrome cell adhesion molecule-like protein Dscam2, partial [Centruroides sculpturatus]	Centruroides sculpturatus			IPR013783;IPR013783;IPR013783;IPR003961;noIPR;noIPR;noIPR;noIPR;IPR003961;IPR003961;IPR003961;IPR003961;IPR003961;IPR003961;IPR036116;IPR036116
TRINITY_DN100344_c1_g1_i11	Down syndrome cell adhesion molecule-like protein Dscam2	3830	1	3.6E-281	62.79%	gi|1009592273|ref|XP_015925121.1|Down syndrome cell adhesion molecule-like protein Dscam2 [Parasteatoda tepidariorum]	Parasteatoda tepidariorum			noIPR;IPR003961;IPR013783;IPR013783;IPR013783;IPR013783;noIPR;IPR013783;IPR013098;IPR013783;IPR013783;IPR013783;IPR013783;noIPR;noIPR;noIPR;noIPR;IPR003961;IPR007110;IPR007110;IPR003961;IPR003961;IPR007110;IPR007110;IPR003961;IPR007110;noIPR;IPR003961;IPR003961;noIPR;IPR003961;IPR003961;IPR036179;IPR036179;IPR036116;IPR036179;IPR036179;IPR036179;IPR036179;IPR036116
TRINITY_DN100344_c1_g1_i14	Down syndrome cell adhesion molecule-like protein Dscam2	1776	1	2.9E-92	55.52%	gi|1316203437|ref|XP_023212047.1|Down syndrome cell adhesion molecule-like protein Dscam2, partial [Centruroides sculpturatus]	Centruroides sculpturatus			IPR013783;IPR013783;IPR013783;IPR003961;noIPR;noIPR;noIPR;noIPR;IPR003961;IPR003961;IPR003961;IPR003961;IPR003961;IPR003961;IPR036116;IPR036116
TRINITY_DN100344_c1_g1_i6	Down syndrome cell adhesion molecule-like protein Dscam2	3798	1	3.5E-281	62.79%	gi|1009592273|ref|XP_015925121.1|Down syndrome cell adhesion molecule-like protein Dscam2 [Parasteatoda tepidariorum]	Parasteatoda tepidariorum			noIPR;IPR013783;IPR013783;IPR013098;IPR013783;IPR003961;IPR013783;IPR013783;IPR013783;IPR013783;IPR013783;IPR013783;noIPR;noIPR;noIPR;noIPR;noIPR;IPR003961;IPR007110;IPR007110;IPR003961;IPR003961;IPR007110;IPR007110;IPR003961;IPR007110;noIPR;IPR003961;IPR003961;noIPR;IPR003961;IPR003961;IPR036179;IPR036179;IPR036179;IPR036179;IPR036116;IPR036179;IPR036179;IPR036116
TRINITY_DN100344_c1_g1_i8	Down syndrome cell adhesion molecule-like protein Dscam2	2455	1	1.5E-120	56.11%	gi|1009592273|ref|XP_015925121.1|Down syndrome cell adhesion molecule-like protein Dscam2 [Parasteatoda tepidariorum]	Parasteatoda tepidariorum			noIPR;IPR013783;IPR013783;IPR013783;IPR003961;IPR013783;IPR013783;noIPR;noIPR;noIPR;noIPR;IPR003961;IPR003961;IPR003961;IPR003961;IPR003961;IPR003961;IPR003961;IPR003961;IPR036179;IPR036116;IPR036116
TRINITY_DN100346_c1_g2_i1	PREDICTED: nephrin-like	754	1	1.2E-15	57.63%	gi|572259567|ref|XP_006608119.1|PREDICTED: nephrin-like [Apis dorsata]	Apis dorsata			IPR013783;noIPR;noIPR;IPR007110;noIPR;IPR036179
TRINITY_DN100346_c1_g2_i3	hemicentin-2	657	1	5.0E-34	56.16%	gi|1192759377|ref|XP_021002082.1|hemicentin-2 [Parasteatoda tepidariorum]	Parasteatoda tepidariorum			IPR013783;noIPR;noIPR;IPR003961;IPR003961;IPR036116;IPR036179
TRINITY_DN100346_c1_g2_i4	hemicentin-2	1036	1	3.6E-34	55.79%	gi|1192759377|ref|XP_021002082.1|hemicentin-2 [Parasteatoda tepidariorum]	Parasteatoda tepidariorum			IPR013783;noIPR;IPR003961;IPR003961;IPR036116;IPR036179
TRINITY_DN100346_c1_g2_i5	hemicentin-2	1247	1	4.3E-34	55.46%	gi|1192759377|ref|XP_021002082.1|hemicentin-2 [Parasteatoda tepidariorum]	Parasteatoda tepidariorum			IPR013783;IPR013783;noIPR;IPR007110;IPR003961;noIPR;IPR003961;IPR036116;IPR036179
TRINITY_DN100346_c1_g2_i6	hemicentin-2	834	1	5.8E-43	56.98%	gi|1192759377|ref|XP_021002082.1|hemicentin-2 [Parasteatoda tepidariorum]	Parasteatoda tepidariorum			IPR013783;IPR013783;noIPR;IPR003961;IPR007110;noIPR;IPR003961;IPR036116;IPR036179
TRINITY_DN100347_c2_g1_i2	flavin-containing monooxygenase, putative	765	1	2.1E-36	75.00%	gi|241721845|ref|XP_002404145.1|flavin-containing monooxygenase, putative [Ixodes scapularis]/gi|215505332|gb|EEC14826.1| flavin-containing monooxygenase, putative [Ixodes scapularis]	Ixodes scapularis/Ixodes scapularis	EC:1.14.13.8;EC:1.14.13	Flavin-containing monooxygenase;Acting on paired donors, with incorporation or reduction of molecular oxygen. The oxygen incorporated need not be derived from O(2)	IPR020946;noIPR;noIPR
TRINITY_DN100347_c2_g1_i3	flavin-containing monooxygenase, putative	682	1	6.1E-75	76.32%	gi|241721845|ref|XP_002404145.1|flavin-containing monooxygenase, putative [Ixodes scapularis]/gi|215505332|gb|EEC14826.1| flavin-containing monooxygenase, putative [Ixodes scapularis]	Ixodes scapularis/Ixodes scapularis	EC:1.14.13.8;EC:1.14.13	Flavin-containing monooxygenase;Acting on paired donors, with incorporation or reduction of molecular oxygen. The oxygen incorporated need not be derived from O(2)	IPR020946;IPR036188;noIPR;noIPR;IPR036188
TRINITY_DN100347_c2_g2_i1	flavin-containing monooxygenase, putative	796	1	9.6E-72	75.96%	gi|241721845|ref|XP_002404145.1|flavin-containing monooxygenase, putative [Ixodes scapularis]/gi|215505332|gb|EEC14826.1| flavin-containing monooxygenase, putative [Ixodes scapularis]	Ixodes scapularis/Ixodes scapularis	EC:1.14.13.8;EC:1.14.13	Flavin-containing monooxygenase;Acting on paired donors, with incorporation or reduction of molecular oxygen. The oxygen incorporated need not be derived from O(2)	IPR000960;IPR020946;IPR036188;noIPR;noIPR;IPR036188
TRINITY_DN100347_c2_g2_i2	flavin-containing monooxygenase, putative	922	1	1.5E-71	75.96%	gi|241721845|ref|XP_002404145.1|flavin-containing monooxygenase, putative [Ixodes scapularis]/gi|215505332|gb|EEC14826.1| flavin-containing monooxygenase, putative [Ixodes scapularis]	Ixodes scapularis/Ixodes scapularis	EC:1.14.13.8;EC:1.14.13	Flavin-containing monooxygenase;Acting on paired donors, with incorporation or reduction of molecular oxygen. The oxygen incorporated need not be derived from O(2)	IPR000960;IPR020946;IPR036188;noIPR;noIPR;IPR036188
TRINITY_DN100347_c2_g2_i3	flavin-containing monooxygenase, putative	581	1	1.9E-32	87.50%	gi|241721845|ref|XP_002404145.1|flavin-containing monooxygenase, putative [Ixodes scapularis]/gi|215505332|gb|EEC14826.1| flavin-containing monooxygenase, putative [Ixodes scapularis]	Ixodes scapularis/Ixodes scapularis	EC:1.14.13.8;EC:1.14.13	Flavin-containing monooxygenase;Acting on paired donors, with incorporation or reduction of molecular oxygen. The oxygen incorporated need not be derived from O(2)	IPR000960;IPR020946;IPR036188;noIPR;noIPR;noIPR;IPR036188
TRINITY_DN100348_c3_g2_i1	Inhibitor of apoptosis 2	1938	1	5.5E-137	99.21%	gi|696122812|gb|AIT40207.1|Inhibitor of apoptosis 2, partial [Rhipicephalus microplus]	Rhipicephalus microplus			noIPR;IPR013083;noIPR;IPR001370;noIPR;noIPR;noIPR;noIPR;noIPR;noIPR;noIPR;noIPR;noIPR;IPR001370;IPR001370;IPR001841;IPR001370;IPR001370;noIPR;IPR001370;noIPR;noIPR;noIPR
TRINITY_DN100348_c3_g2_i2	Inhibitor of apoptosis 2	892	1	1.1E-95	98.96%	gi|696122812|gb|AIT40207.1|Inhibitor of apoptosis 2, partial [Rhipicephalus microplus]	Rhipicephalus microplus			noIPR;IPR017066;IPR013083;noIPR;noIPR;IPR001841;noIPR;noIPR
TRINITY_DN100348_c3_g2_i3	Inhibitor of apoptosis 2	2605	1	7.3E-137	99.21%	gi|696122812|gb|AIT40207.1|Inhibitor of apoptosis 2, partial [Rhipicephalus microplus]	Rhipicephalus microplus			IPR001370;noIPR;noIPR;noIPR;IPR013083;noIPR;noIPR;noIPR;noIPR;noIPR;noIPR;noIPR;IPR001841;IPR001370;IPR001370;IPR001370;noIPR;IPR001370;IPR001370;noIPR;noIPR;noIPR
TRINITY_DN100350_c5_g1_i2	homeobox protein, putative	6338	1	1.8E-11	74.19%	gi|241756344|ref|XP_002406420.1|homeobox protein, putative [Ixodes scapularis]/gi|215506157|gb|EEC15651.1| homeobox protein, putative [Ixodes scapularis]	Ixodes scapularis/Ixodes scapularis			noIPR
TRINITY_DN100350_c5_g1_i3	homeobox protein, putative	6308	1	1.8E-11	74.19%	gi|241756344|ref|XP_002406420.1|homeobox protein, putative [Ixodes scapularis]/gi|215506157|gb|EEC15651.1| homeobox protein, putative [Ixodes scapularis]	Ixodes scapularis/Ixodes scapularis			noIPR
TRINITY_DN100351_c0_g1_i1	transport and Golgi organization protein 6 homolog isoform X1	987	1	3.7E-41	56.01%	gi|926624013|ref|XP_013777446.1|transport and Golgi organization protein 6 homolog isoform X1 [Limulus polyphemus]	Limulus polyphemus			IPR019451;IPR039600;IPR016024
TRINITY_DN100351_c0_g1_i2	conserved hypothetical protein	507	1	1.4E-36	78.15%	gi|241860947|ref|XP_002416303.1|conserved hypothetical protein [Ixodes scapularis]/gi|215510517|gb|EEC19970.1| conserved hypothetical protein [Ixodes scapularis]	Ixodes scapularis/Ixodes scapularis			IPR019451;IPR039600;IPR016024
TRINITY_DN100351_c0_g1_i3	conserved hypothetical protein	618	1	2.8E-34	77.31%	gi|241860947|ref|XP_002416303.1|conserved hypothetical protein [Ixodes scapularis]/gi|215510517|gb|EEC19970.1| conserved hypothetical protein [Ixodes scapularis]	Ixodes scapularis/Ixodes scapularis			IPR011989;IPR019451;IPR039600;IPR016024
TRINITY_DN100351_c0_g1_i4	conserved hypothetical protein	618	1	1.7E-36	78.15%	gi|241860947|ref|XP_002416303.1|conserved hypothetical protein [Ixodes scapularis]/gi|215510517|gb|EEC19970.1| conserved hypothetical protein [Ixodes scapularis]	Ixodes scapularis/Ixodes scapularis			IPR019451;IPR011989;IPR039600;IPR016024
TRINITY_DN100351_c0_g1_i5	transport and Golgi organization protein 6 homolog isoform X1	985	1	2.6E-42	56.01%	gi|926624013|ref|XP_013777446.1|transport and Golgi organization protein 6 homolog isoform X1 [Limulus polyphemus]	Limulus polyphemus			IPR019451;IPR039600;IPR016024
TRINITY_DN100351_c1_g1_i3	transport and Golgi organization protein 6 homolog	620	1	3.6E-18	55.21%	gi|1270088025|ref|XP_022807510.1|transport and Golgi organization protein 6 homolog [Stylophora pistillata]/gi|1263117763|gb|PFX14638.1| Transport and Golgi organization protein 6-like [Stylophora pistillata]	Stylophora pistillata/Stylophora pistillata			IPR039600
TRINITY_DN100352_c3_g2_i3	organic cation transporter protein isoform X1	825	1	2.7E-8	53.59%	gi|780164997|ref|XP_796750.4|PREDICTED: organic cation transporter protein isoform X1 [Strongylocentrotus purpuratus]	Strongylocentrotus purpuratus			noIPR;noIPR;noIPR;noIPR;IPR036259
TRINITY_DN100353_c2_g1_i1	ubiquitin-like protein 4A-B isoform X2	4227	1	1.1E-28	77.05%	gi|926617303|ref|XP_013773809.1|ubiquitin-like protein 4A-B isoform X2 [Limulus polyphemus]	Limulus polyphemus			IPR041421;IPR000626;noIPR;noIPR;noIPR;noIPR;IPR000626;noIPR;IPR029071
TRINITY_DN100353_c2_g1_i4	ubiquitin-like protein 4A-B isoform X2	4168	1	2.0E-35	79.39%	gi|926617303|ref|XP_013773809.1|ubiquitin-like protein 4A-B isoform X2 [Limulus polyphemus]	Limulus polyphemus			IPR019956;noIPR;IPR041421;IPR000626;noIPR;noIPR;noIPR;IPR000626;IPR029071
TRINITY_DN100353_c3_g1_i1	conserved hypothetical protein	2632	1	3.6E-99	61.98%	gi|241745131|ref|XP_002405501.1|conserved hypothetical protein [Ixodes scapularis]/gi|215505826|gb|EEC15320.1| conserved hypothetical protein [Ixodes scapularis]	Ixodes scapularis/Ixodes scapularis			IPR001452;IPR001452;noIPR;IPR011993;IPR001849;noIPR;noIPR;noIPR;IPR037781;IPR001452;IPR001849;IPR036028;noIPR
TRINITY_DN100353_c3_g1_i2	conserved hypothetical protein	2492	1	6.0E-104	62.70%	gi|241745131|ref|XP_002405501.1|conserved hypothetical protein [Ixodes scapularis]/gi|215505826|gb|EEC15320.1| conserved hypothetical protein [Ixodes scapularis]	Ixodes scapularis/Ixodes scapularis			IPR001452;IPR001452;noIPR;IPR001849;IPR011993;noIPR;noIPR;noIPR;IPR037781;IPR001849;IPR001452;noIPR;IPR036028
TRINITY_DN100357_c1_g1_i1	CENP-B homolog protein 2-like	731	1	4.1E-21	57.59%	gi|942196039|ref|XP_014350911.1|PREDICTED: CENP-B homolog protein 2-like [Latimeria chalumnae]	Latimeria chalumnae			IPR006600;noIPR;noIPR;noIPR;IPR006600;IPR009057
TRINITY_DN100357_c1_g1_i2	CENP-B homolog protein 2-like	740	1	3.8E-22	57.59%	gi|942196039|ref|XP_014350911.1|PREDICTED: CENP-B homolog protein 2-like [Latimeria chalumnae]	Latimeria chalumnae			IPR006600;noIPR;noIPR;noIPR;IPR006600;IPR009057
TRINITY_DN100357_c1_g1_i3	hypothetical protein LOTGIDRAFT_83307, partial	1109	1	3.6E-16	52.20%	gi|676459225|ref|XP_009055232.1|hypothetical protein LOTGIDRAFT_83307, partial [Lottia gigantea]/gi|556105426|gb|ESO94078.1| hypothetical protein LOTGIDRAFT_83307, partial [Lottia gigantea]	Lottia gigantea/Lottia gigantea			noIPR;noIPR;noIPR;IPR006600
TRINITY_DN100357_c1_g1_i5	PREDICTED: uncharacterized protein LOC106704924	632	1	9.4E-14	60.87%	gi|942183704|ref|XP_014348525.1|PREDICTED: uncharacterized protein LOC106704924 [Latimeria chalumnae]	Latimeria chalumnae			IPR006600;noIPR;IPR009057
TRINITY_DN100357_c1_g1_i6	CENP-B homolog protein 2-like	849	1	3.7E-21	57.59%	gi|942196039|ref|XP_014350911.1|PREDICTED: CENP-B homolog protein 2-like [Latimeria chalumnae]	Latimeria chalumnae			noIPR;IPR006600;noIPR;noIPR;IPR006600;IPR009057
TRINITY_DN100357_c1_g1_i7	hypothetical protein LOTGIDRAFT_83307, partial	1227	1	8.0E-17	52.83%	gi|676459225|ref|XP_009055232.1|hypothetical protein LOTGIDRAFT_83307, partial [Lottia gigantea]/gi|556105426|gb|ESO94078.1| hypothetical protein LOTGIDRAFT_83307, partial [Lottia gigantea]	Lottia gigantea/Lottia gigantea			noIPR;noIPR;noIPR;IPR006600
TRINITY_DN100357_c1_g1_i8	PREDICTED: uncharacterized protein LOC106704924	686	1	3.9E-13	61.74%	gi|942183704|ref|XP_014348525.1|PREDICTED: uncharacterized protein LOC106704924 [Latimeria chalumnae]	Latimeria chalumnae			IPR006600;noIPR;IPR009057
TRINITY_DN100357_c2_g1_i2	PREDICTED: uncharacterized protein LOC105333004	2071	1	2.8E-6	67.86%	gi|762103140|ref|XP_011434084.1|PREDICTED: uncharacterized protein LOC105333004 [Crassostrea gigas]/gi|762103142|ref|XP_011434085.1| PREDICTED: uncharacterized protein LOC105333004 [Crassostrea gigas]	Crassostrea gigas/Crassostrea gigas			IPR028271;noIPR;noIPR;noIPR;noIPR
TRINITY_DN100357_c2_g1_i3	PREDICTED: uncharacterized protein LOC105333004	1486	1	2.0E-6	67.86%	gi|762103140|ref|XP_011434084.1|PREDICTED: uncharacterized protein LOC105333004 [Crassostrea gigas]/gi|762103142|ref|XP_011434085.1| PREDICTED: uncharacterized protein LOC105333004 [Crassostrea gigas]	Crassostrea gigas/Crassostrea gigas			IPR028271;noIPR;noIPR;noIPR;noIPR
TRINITY_DN100359_c2_g1_i1	mediator of RNA polymerase II transcription subunit 23 isoform X2	4362	1	0.0E0	78.82%	gi|1227962388|ref|XP_021942631.1|mediator of RNA polymerase II transcription subunit 23 isoform X2 [Zootermopsis nevadensis]/gi|646721694|gb|KDR22950.1| Mediator of RNA polymerase II transcription subunit 23 [Zootermopsis nevadensis]	Zootermopsis nevadensis/Zootermopsis nevadensis			IPR021629;IPR021629
TRINITY_DN100359_c2_g1_i2	mediator of RNA polymerase II transcription subunit 23 isoform X2	4831	1	0.0E0	78.59%	gi|1227962388|ref|XP_021942631.1|mediator of RNA polymerase II transcription subunit 23 isoform X2 [Zootermopsis nevadensis]/gi|646721694|gb|KDR22950.1| Mediator of RNA polymerase II transcription subunit 23 [Zootermopsis nevadensis]	Zootermopsis nevadensis/Zootermopsis nevadensis			IPR021629;IPR021629
TRINITY_DN100359_c2_g1_i3	mediator of RNA polymerase II transcription subunit 23 isoform X2	4211	1	0.0E0	79.92%	gi|1227962388|ref|XP_021942631.1|mediator of RNA polymerase II transcription subunit 23 isoform X2 [Zootermopsis nevadensis]/gi|646721694|gb|KDR22950.1| Mediator of RNA polymerase II transcription subunit 23 [Zootermopsis nevadensis]	Zootermopsis nevadensis/Zootermopsis nevadensis			IPR021629;IPR021629
TRINITY_DN100359_c2_g1_i4	mediator of RNA polymerase II transcription subunit 23 isoform X2	3712	1	0.0E0	80.02%	gi|1227962388|ref|XP_021942631.1|mediator of RNA polymerase II transcription subunit 23 isoform X2 [Zootermopsis nevadensis]/gi|646721694|gb|KDR22950.1| Mediator of RNA polymerase II transcription subunit 23 [Zootermopsis nevadensis]	Zootermopsis nevadensis/Zootermopsis nevadensis			IPR021629;IPR021629
TRINITY_DN100360_c0_g1_i1	acetylcholinesterase, putative	1345	1	7.4E-141	91.70%	gi|241002088|ref|XP_002404877.1|acetylcholinesterase, putative [Ixodes scapularis]/gi|215491672|gb|EEC01313.1| acetylcholinesterase, putative [Ixodes scapularis]	Ixodes scapularis/Ixodes scapularis	EC:3.1.1.8;EC:3.1.1.1	Cholinesterase;Carboxylesterase	IPR029058;IPR002018;noIPR;noIPR;IPR029058
TRINITY_DN100360_c0_g1_i2	acetylcholinesterase, putative	1574	1	2.0E-182	92.08%	gi|241002088|ref|XP_002404877.1|acetylcholinesterase, putative [Ixodes scapularis]/gi|215491672|gb|EEC01313.1| acetylcholinesterase, putative [Ixodes scapularis]	Ixodes scapularis/Ixodes scapularis	EC:3.1.1.8;EC:3.1.1.1	Cholinesterase;Carboxylesterase	IPR002018;IPR029058;noIPR;noIPR;IPR029058
TRINITY_DN100360_c0_g1_i5	acetylcholinesterase, putative	814	1	7.3E-67	92.36%	gi|241002088|ref|XP_002404877.1|acetylcholinesterase, putative [Ixodes scapularis]/gi|215491672|gb|EEC01313.1| acetylcholinesterase, putative [Ixodes scapularis]	Ixodes scapularis/Ixodes scapularis	EC:3.1.1.8;EC:3.1.1.1	Cholinesterase;Carboxylesterase	IPR002018;IPR029058;noIPR;IPR029058
TRINITY_DN100360_c0_g1_i6	acetylcholinesterase, putative	1476	1	4.2E-182	92.08%	gi|241002088|ref|XP_002404877.1|acetylcholinesterase, putative [Ixodes scapularis]/gi|215491672|gb|EEC01313.1| acetylcholinesterase, putative [Ixodes scapularis]	Ixodes scapularis/Ixodes scapularis	EC:3.1.1.8;EC:3.1.1.1	Cholinesterase;Carboxylesterase	IPR029058;IPR002018;noIPR;noIPR;IPR029058
TRINITY_DN100360_c1_g1_i1	acetylcholinesterase, putative	2834	1	1.8E-141	71.52%	gi|241558386|ref|XP_002400211.1|acetylcholinesterase, putative [Ixodes scapularis]/gi|215499744|gb|EEC09238.1| acetylcholinesterase, putative, partial [Ixodes scapularis]	Ixodes scapularis/Ixodes scapularis	EC:3.1.1.8;EC:3.1.1.1	Cholinesterase;Carboxylesterase	IPR000997;IPR029058;IPR002018;noIPR;IPR029058
TRINITY_DN100360_c1_g1_i5	acetylcholinesterase, putative	2297	1	2.8E-95	70.40%	gi|241558386|ref|XP_002400211.1|acetylcholinesterase, putative [Ixodes scapularis]/gi|215499744|gb|EEC09238.1| acetylcholinesterase, putative, partial [Ixodes scapularis]	Ixodes scapularis/Ixodes scapularis	EC:3.1.1.1	Carboxylesterase	IPR002018;IPR029058;noIPR;IPR029058
TRINITY_DN100362_c1_g4_i1	PREDICTED: uncharacterized protein LOC105845110	1242	1	5.2E-16	53.93%	gi|828209344|ref|XP_012557941.1|PREDICTED: uncharacterized protein LOC105845110 [Hydra vulgaris]	Hydra vulgaris			noIPR;noIPR;noIPR;noIPR;noIPR;noIPR
TRINITY_DN100362_c1_g4_i2	PREDICTED: uncharacterized protein LOC105845110	1323	1	2.1E-15	53.37%	gi|828209344|ref|XP_012557941.1|PREDICTED: uncharacterized protein LOC105845110 [Hydra vulgaris]	Hydra vulgaris			noIPR;noIPR;noIPR;noIPR;noIPR;noIPR
TRINITY_DN100363_c5_g1_i1	TPA_inf: tumor necrosis factor receptor-associated factor	626	1	2.4E-9	57.29%	gi|325302846|tpg|DAA34448.1|TPA_inf: tumor necrosis factor receptor-associated factor [Amblyomma variegatum]	Amblyomma variegatum			IPR008974;IPR008974
TRINITY_DN100363_c5_g1_i2	TPA_inf: tumor necrosis factor receptor-associated factor	2430	1	9.3E-9	57.29%	gi|325302846|tpg|DAA34448.1|TPA_inf: tumor necrosis factor receptor-associated factor [Amblyomma variegatum]	Amblyomma variegatum			IPR008974;IPR008974
TRINITY_DN100363_c5_g2_i3	Tumor necrosis factor receptor-associated factor-like protein	1331	1	4.4E-21	64.65%	gi|696123067|gb|AIT40222.1|Tumor necrosis factor receptor-associated factor-like protein [Rhipicephalus microplus]	Rhipicephalus microplus			noIPR;IPR013083;noIPR;IPR027139;IPR001841;noIPR;noIPR
TRINITY_DN100363_c5_g2_i6	Tumor necrosis factor receptor-associated factor-like protein	1714	1	9.7E-21	63.64%	gi|696123067|gb|AIT40222.1|Tumor necrosis factor receptor-associated factor-like protein [Rhipicephalus microplus]	Rhipicephalus microplus			IPR013083;noIPR;IPR001841;noIPR;noIPR
TRINITY_DN100364_c5_g2_i2	adhesion G protein-coupled receptor E1-like	4013	1	1.8E-166	62.86%	gi|1238870958|ref|XP_022249556.1|adhesion G protein-coupled receptor E1-like [Limulus polyphemus]	Limulus polyphemus			IPR000832;noIPR;noIPR;IPR000203;noIPR;noIPR;noIPR;IPR013032;noIPR;IPR000742;noIPR;IPR000832;noIPR;noIPR;noIPR;noIPR;noIPR;IPR000742;IPR000203;IPR000742;IPR000742;IPR001879;IPR000742;IPR000742;IPR017981;noIPR;noIPR;noIPR;noIPR;noIPR;noIPR;noIPR;noIPR;noIPR;noIPR;noIPR
TRINITY_DN100365_c0_g1_i1	centrosomal protein, putative	9491	1	2.5E-94	55.16%	gi|240976673|ref|XP_002402468.1|centrosomal protein, putative [Ixodes scapularis]/gi|215491189|gb|EEC00830.1| centrosomal protein, putative [Ixodes scapularis]	Ixodes scapularis/Ixodes scapularis			IPR012929;noIPR;noIPR;noIPR;noIPR;noIPR;noIPR;noIPR;noIPR;noIPR;noIPR;noIPR;noIPR;noIPR;noIPR;noIPR;noIPR;noIPR;noIPR;noIPR;noIPR;noIPR;noIPR
TRINITY_DN100366_c2_g1_i1	natriuretic peptides receptor, putative	2371	1	1.1E-272	95.29%	gi|241119458|ref|XP_002402594.1|natriuretic peptides receptor, putative [Ixodes scapularis]/gi|215493348|gb|EEC02989.1| natriuretic peptides receptor, putative, partial [Ixodes scapularis]	Ixodes scapularis/Ixodes scapularis			IPR001054;IPR029787;noIPR;IPR001245;noIPR;noIPR;noIPR;IPR000719;IPR001054;noIPR;IPR011009;IPR029787
TRINITY_DN100366_c2_g1_i8	natriuretic peptides receptor, putative	3978	1	0.0E0	91.94%	gi|241119458|ref|XP_002402594.1|natriuretic peptides receptor, putative [Ixodes scapularis]/gi|215493348|gb|EEC02989.1| natriuretic peptides receptor, putative, partial [Ixodes scapularis]	Ixodes scapularis/Ixodes scapularis			IPR001170;noIPR;IPR001054;IPR001245;IPR029787;noIPR;noIPR;IPR001828;noIPR;noIPR;IPR000719;IPR001054;noIPR;IPR029787;IPR011009;IPR028082
TRINITY_DN100366_c2_g1_i9	natriuretic peptides receptor, putative	1044	1	2.9E-145	98.13%	gi|241119458|ref|XP_002402594.1|natriuretic peptides receptor, putative [Ixodes scapularis]/gi|215493348|gb|EEC02989.1| natriuretic peptides receptor, putative, partial [Ixodes scapularis]	Ixodes scapularis/Ixodes scapularis			IPR001054;IPR029787;noIPR;noIPR;noIPR;IPR001054;noIPR;IPR029787
TRINITY_DN100367_c2_g1_i1	cytochrome P450, putative	782	1	6.6E-49	70.00%	gi|241737516|ref|XP_002414034.1|cytochrome P450, putative [Ixodes scapularis]/gi|215507888|gb|EEC17342.1| cytochrome P450, putative [Ixodes scapularis]	Ixodes scapularis/Ixodes scapularis			IPR002403;IPR001128;IPR001128;IPR036396;noIPR;IPR036396
TRINITY_DN100367_c2_g1_i4	cytochrome P450, putative	531	1	4.1E-34	74.17%	gi|241737516|ref|XP_002414034.1|cytochrome P450, putative [Ixodes scapularis]/gi|215507888|gb|EEC17342.1| cytochrome P450, putative [Ixodes scapularis]	Ixodes scapularis/Ixodes scapularis			IPR002401;IPR036396;IPR001128;noIPR;IPR036396
TRINITY_DN100367_c2_g1_i5	cytochrome P450, putative	1473	1	1.8E-63	64.34%	gi|241240603|ref|XP_002401737.1|cytochrome P450, putative [Ixodes scapularis]/gi|215496227|gb|EEC05868.1| cytochrome P450, putative [Ixodes scapularis]	Ixodes scapularis/Ixodes scapularis			IPR002401;IPR001128;IPR036396;IPR001128;noIPR;IPR036396
TRINITY_DN100367_c2_g1_i6	cytochrome P450, putative	1473	1	1.8E-63	64.34%	gi|241240603|ref|XP_002401737.1|cytochrome P450, putative [Ixodes scapularis]/gi|215496227|gb|EEC05868.1| cytochrome P450, putative [Ixodes scapularis]	Ixodes scapularis/Ixodes scapularis			IPR002401;IPR001128;IPR036396;IPR001128;noIPR;IPR036396
TRINITY_DN100367_c2_g1_i8	cytochrome P450, putative	714	1	1.7E-48	70.56%	gi|241737516|ref|XP_002414034.1|cytochrome P450, putative [Ixodes scapularis]/gi|215507888|gb|EEC17342.1| cytochrome P450, putative [Ixodes scapularis]	Ixodes scapularis/Ixodes scapularis			IPR001128;IPR002401;IPR001128;IPR036396;noIPR;IPR036396
TRINITY_DN100367_c2_g2_i1	cytochrome P450, putative	771	1	1.2E-66	73.64%	gi|240987958|ref|XP_002404169.1|cytochrome P450, putative [Ixodes scapularis]/gi|215491500|gb|EEC01141.1| cytochrome P450, putative, partial [Ixodes scapularis]	Ixodes scapularis/Ixodes scapularis			IPR036396;IPR001128;noIPR;IPR036396
TRINITY_DN100367_c2_g2_i2	cytochrome P450, putative	1011	1	1.2E-66	73.64%	gi|240987958|ref|XP_002404169.1|cytochrome P450, putative [Ixodes scapularis]/gi|215491500|gb|EEC01141.1| cytochrome P450, putative, partial [Ixodes scapularis]	Ixodes scapularis/Ixodes scapularis			IPR001128;IPR036396;noIPR;IPR036396
TRINITY_DN100367_c2_g2_i3	cytochrome P450, putative	972	1	1.5E-66	73.64%	gi|240987958|ref|XP_002404169.1|cytochrome P450, putative [Ixodes scapularis]/gi|215491500|gb|EEC01141.1| cytochrome P450, putative, partial [Ixodes scapularis]	Ixodes scapularis/Ixodes scapularis			IPR036396;IPR001128;noIPR;IPR036396
TRINITY_DN100367_c2_g2_i4	cytochrome P450, putative	967	1	1.5E-66	73.64%	gi|240987958|ref|XP_002404169.1|cytochrome P450, putative [Ixodes scapularis]/gi|215491500|gb|EEC01141.1| cytochrome P450, putative, partial [Ixodes scapularis]	Ixodes scapularis/Ixodes scapularis			IPR036396;IPR001128;noIPR;IPR036396
TRINITY_DN100368_c5_g2_i1	adipocyte plasma membrane-associated protein, putative	2458	1	3.0E-124	67.57%	gi|241999604|ref|XP_002434445.1|adipocyte plasma membrane-associated protein, putative [Ixodes scapularis]/gi|215497775|gb|EEC07269.1| adipocyte plasma membrane-associated protein, putative [Ixodes scapularis]	Ixodes scapularis/Ixodes scapularis	EC:4.3.3.2	Strictosidine synthase	IPR018119;IPR011042;noIPR;noIPR;IPR004141;noIPR
TRINITY_DN100368_c5_g2_i2	adipocyte plasma membrane-associated protein, putative	2457	1	3.0E-124	67.57%	gi|241999604|ref|XP_002434445.1|adipocyte plasma membrane-associated protein, putative [Ixodes scapularis]/gi|215497775|gb|EEC07269.1| adipocyte plasma membrane-associated protein, putative [Ixodes scapularis]	Ixodes scapularis/Ixodes scapularis	EC:4.3.3.2	Strictosidine synthase	IPR018119;IPR011042;noIPR;noIPR;IPR004141;noIPR
TRINITY_DN100368_c5_g2_i3	adipocyte plasma membrane-associated protein, putative	1239	1	1.1E-98	68.59%	gi|241999604|ref|XP_002434445.1|adipocyte plasma membrane-associated protein, putative [Ixodes scapularis]/gi|215497775|gb|EEC07269.1| adipocyte plasma membrane-associated protein, putative [Ixodes scapularis]	Ixodes scapularis/Ixodes scapularis	EC:4.3.3.2	Strictosidine synthase	IPR011042;IPR018119;IPR004141;noIPR
TRINITY_DN100369_c2_g1_i1	serine/threonine-protein kinase 11-interacting protein-like	1971	1	4.4E-41	52.66%	gi|926623204|ref|XP_013777015.1|serine/threonine-protein kinase 11-interacting protein-like [Limulus polyphemus]/gi|1238854716|ref|XP_022244449.1| serine/threonine-protein kinase 11-interacting protein-like [Limulus polyphemus]/gi|1238854718|ref|XP_022244450.1| serine/threonine-protein kinase 11-interacting protein-like [Limulus polyphemus]	Limulus polyphemus/Limulus polyphemus/Limulus polyphemus			noIPR;noIPR
TRINITY_DN100369_c2_g1_i10	serine/threonine-protein kinase 11-interacting protein-like	3200	1	5.4E-41	52.66%	gi|926623204|ref|XP_013777015.1|serine/threonine-protein kinase 11-interacting protein-like [Limulus polyphemus]/gi|1238854716|ref|XP_022244449.1| serine/threonine-protein kinase 11-interacting protein-like [Limulus polyphemus]/gi|1238854718|ref|XP_022244450.1| serine/threonine-protein kinase 11-interacting protein-like [Limulus polyphemus]	Limulus polyphemus/Limulus polyphemus/Limulus polyphemus			noIPR;noIPR
TRINITY_DN100369_c2_g1_i11	serine/threonine-protein kinase 11-interacting protein-like	3200	1	7.1E-41	52.66%	gi|926623204|ref|XP_013777015.1|serine/threonine-protein kinase 11-interacting protein-like [Limulus polyphemus]/gi|1238854716|ref|XP_022244449.1| serine/threonine-protein kinase 11-interacting protein-like [Limulus polyphemus]/gi|1238854718|ref|XP_022244450.1| serine/threonine-protein kinase 11-interacting protein-like [Limulus polyphemus]	Limulus polyphemus/Limulus polyphemus/Limulus polyphemus			noIPR;noIPR
TRINITY_DN100369_c2_g1_i2	serine/threonine-protein kinase 11-interacting protein-like	3203	1	7.1E-41	52.66%	gi|926623204|ref|XP_013777015.1|serine/threonine-protein kinase 11-interacting protein-like [Limulus polyphemus]/gi|1238854716|ref|XP_022244449.1| serine/threonine-protein kinase 11-interacting protein-like [Limulus polyphemus]/gi|1238854718|ref|XP_022244450.1| serine/threonine-protein kinase 11-interacting protein-like [Limulus polyphemus]	Limulus polyphemus/Limulus polyphemus/Limulus polyphemus			noIPR;noIPR
TRINITY_DN100369_c2_g1_i4	serine/threonine-protein kinase 11-interacting protein-like	1913	1	4.2E-41	52.66%	gi|926623204|ref|XP_013777015.1|serine/threonine-protein kinase 11-interacting protein-like [Limulus polyphemus]/gi|1238854716|ref|XP_022244449.1| serine/threonine-protein kinase 11-interacting protein-like [Limulus polyphemus]/gi|1238854718|ref|XP_022244450.1| serine/threonine-protein kinase 11-interacting protein-like [Limulus polyphemus]	Limulus polyphemus/Limulus polyphemus/Limulus polyphemus			noIPR;noIPR
TRINITY_DN100369_c2_g1_i5	serine/threonine-protein kinase 11-interacting protein-like	3201	1	7.1E-41	52.66%	gi|926623204|ref|XP_013777015.1|serine/threonine-protein kinase 11-interacting protein-like [Limulus polyphemus]/gi|1238854716|ref|XP_022244449.1| serine/threonine-protein kinase 11-interacting protein-like [Limulus polyphemus]/gi|1238854718|ref|XP_022244450.1| serine/threonine-protein kinase 11-interacting protein-like [Limulus polyphemus]	Limulus polyphemus/Limulus polyphemus/Limulus polyphemus			noIPR;noIPR
TRINITY_DN100369_c2_g1_i6	serine/threonine-protein kinase 11-interacting protein-like	3202	1	7.1E-41	52.66%	gi|926623204|ref|XP_013777015.1|serine/threonine-protein kinase 11-interacting protein-like [Limulus polyphemus]/gi|1238854716|ref|XP_022244449.1| serine/threonine-protein kinase 11-interacting protein-like [Limulus polyphemus]/gi|1238854718|ref|XP_022244450.1| serine/threonine-protein kinase 11-interacting protein-like [Limulus polyphemus]	Limulus polyphemus/Limulus polyphemus/Limulus polyphemus			noIPR;noIPR
TRINITY_DN100369_c2_g1_i7	serine/threonine-protein kinase 11-interacting protein-like	1941	1	3.3E-41	52.66%	gi|926623204|ref|XP_013777015.1|serine/threonine-protein kinase 11-interacting protein-like [Limulus polyphemus]/gi|1238854716|ref|XP_022244449.1| serine/threonine-protein kinase 11-interacting protein-like [Limulus polyphemus]/gi|1238854718|ref|XP_022244450.1| serine/threonine-protein kinase 11-interacting protein-like [Limulus polyphemus]	Limulus polyphemus/Limulus polyphemus/Limulus polyphemus			noIPR;noIPR
TRINITY_DN100369_c2_g1_i8	serine/threonine-protein kinase 11-interacting protein-like	1943	1	4.3E-41	52.66%	gi|926623204|ref|XP_013777015.1|serine/threonine-protein kinase 11-interacting protein-like [Limulus polyphemus]/gi|1238854716|ref|XP_022244449.1| serine/threonine-protein kinase 11-interacting protein-like [Limulus polyphemus]/gi|1238854718|ref|XP_022244450.1| serine/threonine-protein kinase 11-interacting protein-like [Limulus polyphemus]	Limulus polyphemus/Limulus polyphemus/Limulus polyphemus			noIPR;noIPR
TRINITY_DN100369_c2_g1_i9	serine/threonine-protein kinase 11-interacting protein-like	1354	1	2.3E-41	52.66%	gi|926623204|ref|XP_013777015.1|serine/threonine-protein kinase 11-interacting protein-like [Limulus polyphemus]/gi|1238854716|ref|XP_022244449.1| serine/threonine-protein kinase 11-interacting protein-like [Limulus polyphemus]/gi|1238854718|ref|XP_022244450.1| serine/threonine-protein kinase 11-interacting protein-like [Limulus polyphemus]	Limulus polyphemus/Limulus polyphemus/Limulus polyphemus			noIPR;noIPR
TRINITY_DN100369_c2_g2_i3	hypothetical protein IscW_ISCW015413	691	1	3.2E-23	85.51%	gi|241804933|ref|XP_002416413.1|hypothetical protein IscW_ISCW015413 [Ixodes scapularis]/gi|215510877|gb|EEC20330.1| hypothetical protein IscW_ISCW015413 [Ixodes scapularis]	Ixodes scapularis/Ixodes scapularis			IPR031782
TRINITY_DN100370_c2_g1_i4	hypothetical protein BIW11_08729, partial	2030	1	7.7E-49	87.83%	gi|1173910794|gb|OQR74972.1|hypothetical protein BIW11_08729, partial [Tropilaelaps mercedesae]	Tropilaelaps mercedesae			IPR002557;noIPR;noIPR;noIPR;noIPR;noIPR;IPR002557;IPR036508
TRINITY_DN100370_c2_g1_i5	hypothetical protein BIW11_08729, partial	1489	1	5.6E-49	87.83%	gi|1173910794|gb|OQR74972.1|hypothetical protein BIW11_08729, partial [Tropilaelaps mercedesae]	Tropilaelaps mercedesae			IPR002557;noIPR;noIPR;noIPR;noIPR;noIPR;IPR002557;IPR036508
TRINITY_DN100370_c2_g1_i6	hypothetical protein BIW11_08729, partial	1447	1	5.5E-49	87.83%	gi|1173910794|gb|OQR74972.1|hypothetical protein BIW11_08729, partial [Tropilaelaps mercedesae]	Tropilaelaps mercedesae			IPR002557;noIPR;noIPR;noIPR;noIPR;noIPR;IPR002557;IPR036508
TRINITY_DN100370_c2_g1_i7	hypothetical protein BIW11_08729, partial	1726	1	6.5E-49	87.83%	gi|1173910794|gb|OQR74972.1|hypothetical protein BIW11_08729, partial [Tropilaelaps mercedesae]	Tropilaelaps mercedesae			IPR002557;noIPR;noIPR;noIPR;noIPR;noIPR;IPR002557;IPR036508
TRINITY_DN100373_c6_g1_i1	conserved hypothetical protein	4978	1	9.6E-69	83.33%	gi|241712095|ref|XP_002413441.1|conserved hypothetical protein [Ixodes scapularis]/gi|215507255|gb|EEC16749.1| conserved hypothetical protein, partial [Ixodes scapularis]	Ixodes scapularis/Ixodes scapularis	EC:2.1.1.43	Histone-lysine N-methyltransferase	noIPR;noIPR;noIPR;noIPR;noIPR
TRINITY_DN100373_c6_g1_i2	conserved hypothetical protein	842	1	2.2E-74	85.16%	gi|241712095|ref|XP_002413441.1|conserved hypothetical protein [Ixodes scapularis]/gi|215507255|gb|EEC16749.1| conserved hypothetical protein, partial [Ixodes scapularis]	Ixodes scapularis/Ixodes scapularis	EC:2.1.1.43	Histone-lysine N-methyltransferase	noIPR;noIPR;noIPR;noIPR;noIPR
TRINITY_DN100373_c6_g1_i3	conserved hypothetical protein	4920	1	9.5E-69	83.33%	gi|241712095|ref|XP_002413441.1|conserved hypothetical protein [Ixodes scapularis]/gi|215507255|gb|EEC16749.1| conserved hypothetical protein, partial [Ixodes scapularis]	Ixodes scapularis/Ixodes scapularis	EC:2.1.1.43	Histone-lysine N-methyltransferase	noIPR;noIPR;noIPR;noIPR;noIPR
TRINITY_DN100374_c1_g2_i1	DNA-binding protein elf-1, putative	3995	1	3.7E-204	77.15%	gi|241605544|ref|XP_002405549.1|DNA-binding protein elf-1, putative [Ixodes scapularis]/gi|215500632|gb|EEC10126.1| DNA-binding protein elf-1, putative, partial [Ixodes scapularis]	Ixodes scapularis/Ixodes scapularis			IPR007604;noIPR;noIPR;noIPR;IPR040167
TRINITY_DN100374_c1_g2_i11	DNA-binding protein elf-1, putative	4002	1	3.7E-204	77.15%	gi|241605544|ref|XP_002405549.1|DNA-binding protein elf-1, putative [Ixodes scapularis]/gi|215500632|gb|EEC10126.1| DNA-binding protein elf-1, putative, partial [Ixodes scapularis]	Ixodes scapularis/Ixodes scapularis			IPR007604;noIPR;noIPR;IPR040167;noIPR
TRINITY_DN100374_c1_g2_i2	DNA-binding protein elf-1, putative	4422	1	4.1E-204	77.15%	gi|241605544|ref|XP_002405549.1|DNA-binding protein elf-1, putative [Ixodes scapularis]/gi|215500632|gb|EEC10126.1| DNA-binding protein elf-1, putative, partial [Ixodes scapularis]	Ixodes scapularis/Ixodes scapularis			IPR007604;noIPR;noIPR;IPR040167;noIPR
TRINITY_DN100374_c1_g2_i3	DNA-binding protein elf-1, putative	2917	1	1.6E-201	76.97%	gi|241605544|ref|XP_002405549.1|DNA-binding protein elf-1, putative [Ixodes scapularis]/gi|215500632|gb|EEC10126.1| DNA-binding protein elf-1, putative, partial [Ixodes scapularis]	Ixodes scapularis/Ixodes scapularis			IPR007604;noIPR;noIPR;noIPR;IPR040167
TRINITY_DN100374_c1_g2_i4	DNA-binding protein elf-1, putative	4418	1	2.5E-201	76.97%	gi|241605544|ref|XP_002405549.1|DNA-binding protein elf-1, putative [Ixodes scapularis]/gi|215500632|gb|EEC10126.1| DNA-binding protein elf-1, putative, partial [Ixodes scapularis]	Ixodes scapularis/Ixodes scapularis			IPR007604;noIPR;noIPR;noIPR;IPR040167
TRINITY_DN100374_c1_g2_i5	protein grainyhead-like isoform X1	1654	1	4.5E-31	64.07%	gi|1253753107|ref|XP_022660561.1|protein grainyhead-like isoform X1 [Varroa destructor]/gi|1253753109|ref|XP_022660562.1| protein grainyhead-like isoform X1 [Varroa destructor]/gi|1253753111|ref|XP_022660563.1| protein grainyhead-like isoform X1 [Varroa destructor]/gi|1253753113|ref|XP_022660564.1| protein grainyhead-like isoform X1 [Varroa destructor]/gi|1253753115|ref|XP_022660565.1| protein gr…	Varroa destructor/Varroa destructor/Varroa destructor/Varroa destructor/Varroa destructor/Varroa destructor/Varroa destructor/Varroa jacobsoni			IPR040167;noIPR
TRINITY_DN100374_c1_g2_i7	DNA-binding protein elf-1, putative	3999	1	2.2E-201	76.97%	gi|241605544|ref|XP_002405549.1|DNA-binding protein elf-1, putative [Ixodes scapularis]/gi|215500632|gb|EEC10126.1| DNA-binding protein elf-1, putative, partial [Ixodes scapularis]	Ixodes scapularis/Ixodes scapularis			IPR007604;noIPR;noIPR;noIPR;IPR040167
TRINITY_DN100376_c2_g1_i1	seryl-tRNA synthetase, putative	1153	1	1.2E-131	95.98%	gi|241061140|ref|XP_002408067.1|seryl-tRNA synthetase, putative [Ixodes scapularis]/gi|215492361|gb|EEC02002.1| seryl-tRNA synthetase, putative [Ixodes scapularis]	Ixodes scapularis/Ixodes scapularis	EC:6.1.1.11	Serine--tRNA ligase	IPR002317;IPR002314;noIPR;IPR002317;noIPR;noIPR;IPR002317;noIPR;IPR006195;IPR033729;noIPR
TRINITY_DN100376_c2_g1_i2	seryl-tRNA synthetase, putative	3300	1	2.6E-232	85.94%	gi|241061140|ref|XP_002408067.1|seryl-tRNA synthetase, putative [Ixodes scapularis]/gi|215492361|gb|EEC02002.1| seryl-tRNA synthetase, putative [Ixodes scapularis]	Ixodes scapularis/Ixodes scapularis	EC:6.1.1.11	Serine--tRNA ligase	IPR002317;noIPR;IPR002314;noIPR;IPR002317;IPR002317;IPR015866;noIPR;noIPR;noIPR;IPR002317;IPR006195;IPR033729;IPR010978;noIPR
TRINITY_DN100376_c2_g1_i3	seryl-tRNA synthetase, putative	2006	1	1.4E-191	83.95%	gi|241061140|ref|XP_002408067.1|seryl-tRNA synthetase, putative [Ixodes scapularis]/gi|215492361|gb|EEC02002.1| seryl-tRNA synthetase, putative [Ixodes scapularis]	Ixodes scapularis/Ixodes scapularis	EC:6.1.1.11	Serine--tRNA ligase	IPR002317;IPR002314;IPR002317;noIPR;noIPR;noIPR;noIPR;IPR002317;noIPR;IPR006195;IPR033729;noIPR
TRINITY_DN100376_c2_g1_i4	seryl-tRNA synthetase, putative	3402	1	4.2E-233	86.14%	gi|241061140|ref|XP_002408067.1|seryl-tRNA synthetase, putative [Ixodes scapularis]/gi|215492361|gb|EEC02002.1| seryl-tRNA synthetase, putative [Ixodes scapularis]	Ixodes scapularis/Ixodes scapularis	EC:6.1.1.11	Serine--tRNA ligase	IPR002317;IPR002314;IPR002317;noIPR;IPR002317;IPR015866;noIPR;noIPR;noIPR;IPR002317;noIPR;IPR006195;IPR033729;noIPR;IPR010978
TRINITY_DN100376_c2_g1_i6	seryl-tRNA synthetase, putative	5689	1	4.5E-232	85.94%	gi|241061140|ref|XP_002408067.1|seryl-tRNA synthetase, putative [Ixodes scapularis]/gi|215492361|gb|EEC02002.1| seryl-tRNA synthetase, putative [Ixodes scapularis]	Ixodes scapularis/Ixodes scapularis	EC:6.1.1.11	Serine--tRNA ligase	IPR002317;noIPR;IPR002314;IPR002317;noIPR;IPR002317;IPR015866;noIPR;noIPR;noIPR;IPR002317;IPR006195;IPR033729;IPR010978;noIPR
TRINITY_DN100376_c2_g1_i7	seryl-tRNA synthetase, putative	5791	1	7.1E-233	86.14%	gi|241061140|ref|XP_002408067.1|seryl-tRNA synthetase, putative [Ixodes scapularis]/gi|215492361|gb|EEC02002.1| seryl-tRNA synthetase, putative [Ixodes scapularis]	Ixodes scapularis/Ixodes scapularis	EC:6.1.1.11	Serine--tRNA ligase	IPR002317;IPR002314;IPR002317;IPR002317;noIPR;IPR015866;noIPR;noIPR;noIPR;IPR002317;noIPR;IPR006195;IPR033729;noIPR;IPR010978
TRINITY_DN100376_c2_g1_i8	seryl-tRNA synthetase, putative	1904	1	6.4E-191	83.72%	gi|241061140|ref|XP_002408067.1|seryl-tRNA synthetase, putative [Ixodes scapularis]/gi|215492361|gb|EEC02002.1| seryl-tRNA synthetase, putative [Ixodes scapularis]	Ixodes scapularis/Ixodes scapularis	EC:6.1.1.11	Serine--tRNA ligase	IPR002317;noIPR;IPR002314;noIPR;IPR002317;noIPR;noIPR;noIPR;IPR002317;IPR006195;IPR033729;noIPR
TRINITY_DN100376_c2_g1_i9	seryl-tRNA synthetase, putative	2983	1	3.1E-216	80.92%	gi|241061140|ref|XP_002408067.1|seryl-tRNA synthetase, putative [Ixodes scapularis]/gi|215492361|gb|EEC02002.1| seryl-tRNA synthetase, putative [Ixodes scapularis]	Ixodes scapularis/Ixodes scapularis	EC:6.1.1.11	Serine--tRNA ligase	IPR002317;noIPR;IPR015866;IPR002317;IPR002317;noIPR;IPR002314;noIPR;noIPR;noIPR;IPR002317;IPR006195;IPR033729;noIPR;IPR010978
TRINITY_DN100377_c1_g1_i1	calcitonin receptor, putative	2730	1	1.1E-135	60.94%	gi|241159153|ref|XP_002408426.1|calcitonin receptor, putative [Ixodes scapularis]/gi|215494342|gb|EEC03983.1| calcitonin receptor, putative [Ixodes scapularis]	Ixodes scapularis/Ixodes scapularis			IPR000832;IPR036445;IPR000832;IPR001879;noIPR;noIPR;noIPR;IPR017981;IPR001879;noIPR;noIPR;IPR036445
TRINITY_DN100377_c1_g1_i10	calcitonin receptor, putative	1035	1	5.1E-49	85.27%	gi|241159153|ref|XP_002408426.1|calcitonin receptor, putative [Ixodes scapularis]/gi|215494342|gb|EEC03983.1| calcitonin receptor, putative [Ixodes scapularis]	Ixodes scapularis/Ixodes scapularis			IPR000832;noIPR;IPR000832;noIPR;noIPR;IPR017981
TRINITY_DN100377_c1_g1_i3	calcitonin receptor, putative	743	1	3.7E-49	85.27%	gi|241159153|ref|XP_002408426.1|calcitonin receptor, putative [Ixodes scapularis]/gi|215494342|gb|EEC03983.1| calcitonin receptor, putative [Ixodes scapularis]	Ixodes scapularis/Ixodes scapularis			IPR000832;noIPR;IPR000832;noIPR;noIPR;IPR017981
TRINITY_DN100377_c1_g1_i4	calcitonin receptor, putative	1277	1	6.3E-49	85.27%	gi|241159153|ref|XP_002408426.1|calcitonin receptor, putative [Ixodes scapularis]/gi|215494342|gb|EEC03983.1| calcitonin receptor, putative [Ixodes scapularis]	Ixodes scapularis/Ixodes scapularis			IPR000832;noIPR;IPR000832;noIPR;noIPR;IPR017981
TRINITY_DN100377_c1_g1_i5	calcitonin receptor, putative	1277	1	6.3E-49	85.27%	gi|241159153|ref|XP_002408426.1|calcitonin receptor, putative [Ixodes scapularis]/gi|215494342|gb|EEC03983.1| calcitonin receptor, putative [Ixodes scapularis]	Ixodes scapularis/Ixodes scapularis			IPR000832;noIPR;IPR000832;noIPR;noIPR;IPR017981
TRINITY_DN100377_c1_g1_i6	calcitonin receptor, putative	966	1	6.2E-49	63.43%	gi|242003888|ref|XP_002436229.1|calcitonin receptor, putative [Ixodes scapularis]/gi|215499565|gb|EEC09059.1| calcitonin receptor, putative, partial [Ixodes scapularis]	Ixodes scapularis/Ixodes scapularis			IPR036445;IPR001879;noIPR;noIPR;IPR001879;IPR036445
TRINITY_DN100377_c1_g1_i7	calcitonin receptor, putative	1678	1	6.7E-91	72.36%	gi|241159153|ref|XP_002408426.1|calcitonin receptor, putative [Ixodes scapularis]/gi|215494342|gb|EEC03983.1| calcitonin receptor, putative [Ixodes scapularis]	Ixodes scapularis/Ixodes scapularis			IPR000832;IPR000832;noIPR;noIPR;noIPR;IPR017981
TRINITY_DN100377_c1_g1_i8	calcitonin receptor, putative	1846	1	9.0E-105	73.38%	gi|241159153|ref|XP_002408426.1|calcitonin receptor, putative [Ixodes scapularis]/gi|215494342|gb|EEC03983.1| calcitonin receptor, putative [Ixodes scapularis]	Ixodes scapularis/Ixodes scapularis			IPR000832;noIPR;IPR000832;noIPR;noIPR;IPR017981;noIPR
TRINITY_DN100378_c0_g1_i5	breast cancer metastasis-suppressor, putative	622	1	2.8E-10	74.67%	gi|240995535|ref|XP_002404611.1|breast cancer metastasis-suppressor, putative [Ixodes scapularis]/gi|215491613|gb|EEC01254.1| breast cancer metastasis-suppressor, putative [Ixodes scapularis]	Ixodes scapularis/Ixodes scapularis	EC:3.5.1.98	Histone deacetylase
TRINITY_DN100380_c1_g1_i1	Tumor necrosis factor receptor-associated factor-like protein	1255	1	4.0E-48	54.05%	gi|696123067|gb|AIT40222.1|Tumor necrosis factor receptor-associated factor-like protein [Rhipicephalus microplus]	Rhipicephalus microplus			noIPR;IPR013083;noIPR;IPR027139;IPR001841;noIPR;noIPR
TRINITY_DN100380_c1_g1_i2	Tumor necrosis factor receptor-associated factor-like protein	1255	1	8.9E-48	53.72%	gi|696123067|gb|AIT40222.1|Tumor necrosis factor receptor-associated factor-like protein [Rhipicephalus microplus]	Rhipicephalus microplus			noIPR;IPR013083;IPR027139;noIPR;IPR001841;noIPR;noIPR
TRINITY_DN100380_c1_g1_i3	Tumor necrosis factor receptor-associated factor-like protein	685	1	3.6E-43	65.82%	gi|696123067|gb|AIT40222.1|Tumor necrosis factor receptor-associated factor-like protein [Rhipicephalus microplus]	Rhipicephalus microplus			IPR013083;noIPR;IPR027139;noIPR;IPR001841;noIPR;noIPR
TRINITY_DN100380_c1_g1_i4	Tumor necrosis factor receptor-associated factor-like protein	1255	1	3.2E-45	53.04%	gi|696123067|gb|AIT40222.1|Tumor necrosis factor receptor-associated factor-like protein [Rhipicephalus microplus]	Rhipicephalus microplus			IPR013083;noIPR;IPR027139;noIPR;IPR001841;noIPR;IPR008974;noIPR
TRINITY_DN100380_c1_g1_i5	Tumor necrosis factor receptor-associated factor-like protein	685	1	5.2E-42	65.82%	gi|696123067|gb|AIT40222.1|Tumor necrosis factor receptor-associated factor-like protein [Rhipicephalus microplus]	Rhipicephalus microplus			IPR013083;noIPR;noIPR;IPR027139;IPR001841;noIPR;noIPR
TRINITY_DN100380_c2_g2_i4	Tumor necrosis factor receptor-associated factor-like protein	1623	1	1.7E-14	57.97%	gi|696123067|gb|AIT40222.1|Tumor necrosis factor receptor-associated factor-like protein [Rhipicephalus microplus]	Rhipicephalus microplus			IPR008974;IPR008974
TRINITY_DN100380_c2_g2_i5	Tumor necrosis factor receptor-associated factor-like protein	1618	1	1.7E-14	57.97%	gi|696123067|gb|AIT40222.1|Tumor necrosis factor receptor-associated factor-like protein [Rhipicephalus microplus]	Rhipicephalus microplus			IPR008974;IPR008974
TRINITY_DN100381_c4_g2_i2	RNA-directed DNA polymerase from mobile element jockey-like	798	1	7.9E-50	58.30%	gi|1005432287|ref|XP_015753740.1|PREDICTED: RNA-directed DNA polymerase from mobile element jockey-like [Acropora digitifera]	Acropora digitifera			IPR000477;noIPR;IPR000477;noIPR
TRINITY_DN100382_c1_g1_i2	RNA-directed DNA polymerase from mobile element jockey-like	706	1	2.1E-25	62.00%	gi|957861869|ref|XP_014679418.1|PREDICTED: RNA-directed DNA polymerase from mobile element jockey-like, partial [Priapulus caudatus]	Priapulus caudatus			IPR000477;noIPR
TRINITY_DN100382_c1_g1_i4	PREDICTED: uncharacterized protein LOC105845110	1787	1	1.6E-13	57.25%	gi|828209344|ref|XP_012557941.1|PREDICTED: uncharacterized protein LOC105845110 [Hydra vulgaris]	Hydra vulgaris			noIPR;IPR004244
TRINITY_DN100383_c10_g1_i12	conserved hypothetical protein	3321	1	1.8E-26	73.68%	gi|241836502|ref|XP_002415100.1|conserved hypothetical protein [Ixodes scapularis]/gi|215509312|gb|EEC18765.1| conserved hypothetical protein [Ixodes scapularis]	Ixodes scapularis/Ixodes scapularis			noIPR;noIPR
TRINITY_DN100383_c10_g1_i13	conserved hypothetical protein	2714	1	1.4E-26	73.68%	gi|241836502|ref|XP_002415100.1|conserved hypothetical protein [Ixodes scapularis]/gi|215509312|gb|EEC18765.1| conserved hypothetical protein [Ixodes scapularis]	Ixodes scapularis/Ixodes scapularis			noIPR;noIPR
TRINITY_DN100383_c10_g1_i2	conserved hypothetical protein	2696	1	1.4E-26	73.68%	gi|241836502|ref|XP_002415100.1|conserved hypothetical protein [Ixodes scapularis]/gi|215509312|gb|EEC18765.1| conserved hypothetical protein [Ixodes scapularis]	Ixodes scapularis/Ixodes scapularis			noIPR;noIPR
TRINITY_DN100383_c10_g1_i3	conserved hypothetical protein	969	1	6.7E-27	80.21%	gi|241836502|ref|XP_002415100.1|conserved hypothetical protein [Ixodes scapularis]/gi|215509312|gb|EEC18765.1| conserved hypothetical protein [Ixodes scapularis]	Ixodes scapularis/Ixodes scapularis			noIPR
TRINITY_DN100383_c10_g1_i4	conserved hypothetical protein	1400	1	4.3E-27	80.21%	gi|241836502|ref|XP_002415100.1|conserved hypothetical protein [Ixodes scapularis]/gi|215509312|gb|EEC18765.1| conserved hypothetical protein [Ixodes scapularis]	Ixodes scapularis/Ixodes scapularis
TRINITY_DN100383_c10_g1_i5	conserved hypothetical protein	3304	1	1.8E-26	73.68%	gi|241836502|ref|XP_002415100.1|conserved hypothetical protein [Ixodes scapularis]/gi|215509312|gb|EEC18765.1| conserved hypothetical protein [Ixodes scapularis]	Ixodes scapularis/Ixodes scapularis			noIPR;noIPR
TRINITY_DN100383_c10_g1_i9	conserved hypothetical protein	1044	1	1.9E-27	72.97%	gi|241836502|ref|XP_002415100.1|conserved hypothetical protein [Ixodes scapularis]/gi|215509312|gb|EEC18765.1| conserved hypothetical protein [Ixodes scapularis]	Ixodes scapularis/Ixodes scapularis
TRINITY_DN100384_c2_g1_i1	multidrug resistance protein, putative	9366	1	0.0E0	83.10%	gi|241747023|ref|XP_002414302.1|multidrug resistance protein, putative [Ixodes scapularis]/gi|215508156|gb|EEC17610.1| multidrug resistance protein, putative, partial [Ixodes scapularis]	Ixodes scapularis/Ixodes scapularis	EC:3.6.1.3;EC:3.6.1.15	Adenosinetriphosphatase;Nucleoside-triphosphate phosphatase	IPR011527;IPR003439;noIPR;IPR005292;IPR003439;noIPR;IPR036640;noIPR;noIPR;noIPR;noIPR;IPR030247;noIPR;IPR011527;IPR003439;IPR011527;IPR003439;noIPR;noIPR;IPR036640;IPR027417;IPR027417;IPR036640
TRINITY_DN100384_c2_g1_i2	multidrug resistance protein, putative	9357	1	0.0E0	83.10%	gi|241747023|ref|XP_002414302.1|multidrug resistance protein, putative [Ixodes scapularis]/gi|215508156|gb|EEC17610.1| multidrug resistance protein, putative, partial [Ixodes scapularis]	Ixodes scapularis/Ixodes scapularis	EC:3.6.1.3;EC:3.6.1.15	Adenosinetriphosphatase;Nucleoside-triphosphate phosphatase	IPR011527;IPR003439;noIPR;IPR005292;IPR003439;noIPR;IPR036640;noIPR;noIPR;noIPR;noIPR;IPR030247;noIPR;IPR011527;IPR003439;IPR011527;IPR003439;noIPR;noIPR;IPR036640;IPR027417;IPR027417;IPR036640
TRINITY_DN100385_c0_g1_i3	solute carrier organic anion transporter family member 4A1-like	2330	1	5.5E-184	75.14%	gi|1192743279|ref|XP_021002454.1|solute carrier organic anion transporter family member 4A1-like [Parasteatoda tepidariorum]/gi|1192743281|ref|XP_021002455.1| solute carrier organic anion transporter family member 4A1-like [Parasteatoda tepidariorum]	Parasteatoda tepidariorum/Parasteatoda tepidariorum			noIPR;IPR004156;IPR002350;IPR004156;noIPR;IPR004156;IPR020846;IPR002350;IPR020846;noIPR;IPR036259;IPR036058
TRINITY_DN100387_c4_g2_i1	conserved hypothetical protein	1545	1	7.2E-39	73.25%	gi|241156115|ref|XP_002407699.1|conserved hypothetical protein [Ixodes scapularis]/gi|215494193|gb|EEC03834.1| conserved hypothetical protein [Ixodes scapularis]	Ixodes scapularis/Ixodes scapularis			IPR038377;noIPR;noIPR;IPR001734
TRINITY_DN100387_c4_g2_i2	conserved hypothetical protein	1503	1	7.0E-39	73.25%	gi|241156115|ref|XP_002407699.1|conserved hypothetical protein [Ixodes scapularis]/gi|215494193|gb|EEC03834.1| conserved hypothetical protein [Ixodes scapularis]	Ixodes scapularis/Ixodes scapularis			IPR038377;noIPR;noIPR;IPR001734
TRINITY_DN100387_c4_g3_i1	protein Njmu-R1-like	2624	1	1.1E-36	50.41%	gi|957825177|ref|XP_014662360.1|PREDICTED: protein Njmu-R1-like [Priapulus caudatus]	Priapulus caudatus			IPR028280;noIPR;noIPR;IPR028280
TRINITY_DN100388_c2_g1_i1	secreted mucin MUC17, putative	7881	1	4.0E-69	59.17%	gi|241018399|ref|XP_002405770.1|secreted mucin MUC17, putative [Ixodes scapularis]/gi|215491800|gb|EEC01441.1| secreted mucin MUC17, putative [Ixodes scapularis]	Ixodes scapularis/Ixodes scapularis			noIPR;noIPR;noIPR;noIPR;noIPR;noIPR;noIPR;noIPR;noIPR;noIPR;noIPR;noIPR;noIPR;noIPR;noIPR;noIPR;noIPR;noIPR;noIPR;noIPR;noIPR;noIPR;noIPR;IPR001007;IPR001007;IPR001007;IPR001007;noIPR;noIPR;noIPR;noIPR;noIPR
TRINITY_DN100388_c2_g1_i2	secreted mucin MUC17, putative	7884	1	4.0E-69	59.17%	gi|241018399|ref|XP_002405770.1|secreted mucin MUC17, putative [Ixodes scapularis]/gi|215491800|gb|EEC01441.1| secreted mucin MUC17, putative [Ixodes scapularis]	Ixodes scapularis/Ixodes scapularis			noIPR;noIPR;noIPR;noIPR;noIPR;noIPR;noIPR;noIPR;noIPR;noIPR;noIPR;noIPR;noIPR;noIPR;noIPR;noIPR;noIPR;noIPR;noIPR;noIPR;IPR001007;IPR001007;IPR001007;IPR001007;noIPR;noIPR;noIPR;noIPR;noIPR
TRINITY_DN100390_c1_g2_i1	ovochymase, putative	694	1	2.2E-96	92.75%	gi|241131477|ref|XP_002404516.1|ovochymase, putative [Ixodes scapularis]/gi|215493620|gb|EEC03261.1| ovochymase, putative [Ixodes scapularis]	Ixodes scapularis/Ixodes scapularis	EC:3.4.21	Acting on peptide bonds (peptidases)	IPR001314;IPR001254;noIPR;noIPR;noIPR;IPR001254;IPR001254;IPR009003
TRINITY_DN100390_c1_g2_i2	ovochymase, putative	612	1	2.5E-96	92.75%	gi|241131477|ref|XP_002404516.1|ovochymase, putative [Ixodes scapularis]/gi|215493620|gb|EEC03261.1| ovochymase, putative [Ixodes scapularis]	Ixodes scapularis/Ixodes scapularis	EC:3.4.21	Acting on peptide bonds (peptidases)	noIPR;IPR001254;noIPR;IPR001254;IPR001254;IPR009003
TRINITY_DN100390_c1_g2_i3	ovochymase, putative	1129	1	2.5E-134	93.18%	gi|241131477|ref|XP_002404516.1|ovochymase, putative [Ixodes scapularis]/gi|215493620|gb|EEC03261.1| ovochymase, putative [Ixodes scapularis]	Ixodes scapularis/Ixodes scapularis	EC:3.4.21	Acting on peptide bonds (peptidases)	IPR001314;IPR001254;noIPR;noIPR;noIPR;noIPR;IPR001254;IPR001254;IPR009003
TRINITY_DN100390_c1_g2_i4	ovochymase, putative	1529	1	7.6E-134	93.46%	gi|241131477|ref|XP_002404516.1|ovochymase, putative [Ixodes scapularis]/gi|215493620|gb|EEC03261.1| ovochymase, putative [Ixodes scapularis]	Ixodes scapularis/Ixodes scapularis	EC:3.4.21	Acting on peptide bonds (peptidases)	IPR001314;noIPR;IPR001254;noIPR;noIPR;IPR001254;IPR001254;IPR009003
TRINITY_DN100391_c4_g1_i2	hypothetical protein IscW_ISCW023058	4561	1	1.9E-228	54.29%	gi|241859179|ref|XP_002416178.1|hypothetical protein IscW_ISCW023058 [Ixodes scapularis]/gi|215510392|gb|EEC19845.1| hypothetical protein IscW_ISCW023058 [Ixodes scapularis]	Ixodes scapularis/Ixodes scapularis			IPR005492;noIPR;noIPR;noIPR;IPR009039;IPR009039;IPR009039
TRINITY_DN100392_c2_g1_i1	TPA_inf: Bax-mediated apoptosis inhibitor TEGT/BI-1	2467	1	1.3E-87	97.81%	gi|325304040|tpg|DAA34721.1|TPA_inf: Bax-mediated apoptosis inhibitor TEGT/BI-1 [Amblyomma variegatum]	Amblyomma variegatum			IPR006214;noIPR;IPR006214;noIPR
TRINITY_DN100392_c2_g1_i2	TPA_inf: Bax-mediated apoptosis inhibitor TEGT/BI-1	2709	1	1.8E-37	94.90%	gi|325304040|tpg|DAA34721.1|TPA_inf: Bax-mediated apoptosis inhibitor TEGT/BI-1 [Amblyomma variegatum]	Amblyomma variegatum			IPR006214;IPR006214;noIPR
TRINITY_DN100392_c2_g1_i3	TPA_inf: Bax-mediated apoptosis inhibitor TEGT/BI-1	3105	1	3.6E-114	95.06%	gi|325304040|tpg|DAA34721.1|TPA_inf: Bax-mediated apoptosis inhibitor TEGT/BI-1 [Amblyomma variegatum]	Amblyomma variegatum			IPR006214;IPR006214;noIPR;noIPR
TRINITY_DN100392_c2_g1_i4	TPA_inf: Bax-mediated apoptosis inhibitor TEGT/BI-1	3084	1	2.2E-116	97.88%	gi|325304040|tpg|DAA34721.1|TPA_inf: Bax-mediated apoptosis inhibitor TEGT/BI-1 [Amblyomma variegatum]	Amblyomma variegatum			IPR006214;noIPR;IPR006214;noIPR
TRINITY_DN100392_c2_g1_i5	TPA_inf: Bax-mediated apoptosis inhibitor TEGT/BI-1	2348	1	3.7E-111	97.81%	gi|325304040|tpg|DAA34721.1|TPA_inf: Bax-mediated apoptosis inhibitor TEGT/BI-1 [Amblyomma variegatum]	Amblyomma variegatum			IPR006214;IPR006214;noIPR;noIPR
TRINITY_DN100393_c2_g3_i1	replication factor C, subunit RFC2, putative	1776	1	2.3E-166	94.64%	gi|241725881|ref|XP_002412213.1|replication factor C, subunit RFC2, putative [Ixodes scapularis]/gi|215505426|gb|EEC14920.1| replication factor C, subunit RFC2, putative [Ixodes scapularis]	Ixodes scapularis/Ixodes scapularis			noIPR;noIPR;IPR013748;IPR003959;noIPR;noIPR;noIPR;noIPR;IPR027417;IPR008921
TRINITY_DN100395_c3_g1_i2	Down syndrome cell adhesion molecule-like protein Dscam2 isoform X1	3999	1	2.0E-210	59.19%	gi|1316177024|ref|XP_023234039.1|Down syndrome cell adhesion molecule-like protein Dscam2 isoform X1 [Centruroides sculpturatus]	Centruroides sculpturatus			IPR013783;IPR013783;IPR013783;IPR013098;IPR013783;IPR003961;IPR013783;IPR013783;noIPR;IPR013783;IPR013783;noIPR;noIPR;IPR007110;IPR007110;IPR003961;IPR003961;IPR007110;IPR007110;IPR007110;IPR003961;IPR003961;IPR003961;IPR003961;noIPR;noIPR;noIPR;noIPR;IPR003961;IPR003961;IPR036179;IPR036116;IPR036179;IPR036116;IPR036179;IPR036179;IPR036179
TRINITY_DN100397_c3_g1_i1	centaurin beta, putative	4118	1	3.4E-229	80.40%	gi|241333942|ref|XP_002408378.1|centaurin beta, putative [Ixodes scapularis]/gi|215497326|gb|EEC06820.1| centaurin beta, putative [Ixodes scapularis]	Ixodes scapularis/Ixodes scapularis			IPR001164;noIPR;IPR036770;IPR027267;IPR011993;IPR038508;IPR001164;IPR020683;IPR001849;noIPR;noIPR;noIPR;noIPR;noIPR;noIPR;IPR001849;IPR002110;IPR002110;IPR001164;IPR020683;IPR020683;noIPR;IPR036770;IPR037278;noIPR;IPR027267
TRINITY_DN100397_c3_g1_i3	arf-GAP with coiled-coil, ANK repeat and PH domain-containing protein 2-like	930	1	3.4E-52	83.92%	gi|1316169938|ref|XP_023230383.1|arf-GAP with coiled-coil, ANK repeat and PH domain-containing protein 2-like [Centruroides sculpturatus]/gi|1316169940|ref|XP_023230384.1| arf-GAP with coiled-coil, ANK repeat and PH domain-containing protein 2-like [Centruroides sculpturatus]/gi|1316169942|ref|XP_023230385.1| arf-GAP with coiled-coil, ANK repeat and PH domain-containing protein 2-like [Centruroid…	Centruroides sculpturatus/Centruroides sculpturatus/Centruroides sculpturatus			IPR011993;noIPR;IPR001849;IPR027267;noIPR;noIPR;IPR001849;noIPR;IPR027267;noIPR
TRINITY_DN100397_c3_g1_i4	centaurin beta, putative	4336	1	1.1E-230	75.24%	gi|241333942|ref|XP_002408378.1|centaurin beta, putative [Ixodes scapularis]/gi|215497326|gb|EEC06820.1| centaurin beta, putative [Ixodes scapularis]	Ixodes scapularis/Ixodes scapularis			IPR001164;IPR027267;IPR001849;noIPR;IPR001164;IPR020683;IPR036770;IPR011993;IPR038508;noIPR;noIPR;noIPR;noIPR;noIPR;noIPR;IPR001849;IPR002110;IPR002110;IPR001164;IPR020683;IPR020683;noIPR;IPR027267;IPR037278;noIPR;IPR036770
TRINITY_DN100397_c3_g1_i5	centaurin beta, putative	4984	1	1.4E-293	74.94%	gi|241333942|ref|XP_002408378.1|centaurin beta, putative [Ixodes scapularis]/gi|215497326|gb|EEC06820.1| centaurin beta, putative [Ixodes scapularis]	Ixodes scapularis/Ixodes scapularis			IPR001164;IPR038508;noIPR;IPR011993;IPR027267;IPR020683;IPR001849;IPR036770;IPR001164;noIPR;noIPR;noIPR;noIPR;noIPR;noIPR;IPR001849;IPR020683;IPR002110;IPR001164;IPR002110;IPR020683;noIPR;noIPR;noIPR;IPR036770;IPR027267;IPR037278
TRINITY_DN100397_c3_g1_i6	centaurin beta, putative	4425	1	3.7E-229	80.40%	gi|241333942|ref|XP_002408378.1|centaurin beta, putative [Ixodes scapularis]/gi|215497326|gb|EEC06820.1| centaurin beta, putative [Ixodes scapularis]	Ixodes scapularis/Ixodes scapularis			IPR001164;noIPR;IPR036770;IPR027267;IPR011993;IPR038508;IPR001164;IPR020683;IPR001849;noIPR;noIPR;noIPR;noIPR;noIPR;noIPR;IPR001849;IPR002110;IPR002110;IPR001164;IPR020683;IPR020683;noIPR;IPR036770;IPR037278;noIPR;IPR027267
TRINITY_DN100399_c1_g2_i3	enzymatic polyprotein, putative	684	1	6.6E-21	55.08%	gi|242022144|ref|XP_002431501.1|enzymatic polyprotein, putative [Pediculus humanus corporis]/gi|212516795|gb|EEB18763.1| enzymatic polyprotein, putative [Pediculus humanus corporis]	Pediculus humanus corporis/Pediculus humanus corporis
TRINITY_DN100399_c1_g3_i1	valacyclovir hydrolase, putative	508	1	8.1E-16	78.21%	gi|241646926|ref|XP_002409893.1|valacyclovir hydrolase, putative [Ixodes scapularis]/gi|215501462|gb|EEC10956.1| valacyclovir hydrolase, putative, partial [Ixodes scapularis]	Ixodes scapularis/Ixodes scapularis	EC:3.1.1.1	Carboxylesterase	IPR029058;IPR029058
TRINITY_DN100399_c1_g3_i2	valacyclovir hydrolase, putative	2462	1	7.3E-86	70.81%	gi|241646926|ref|XP_002409893.1|valacyclovir hydrolase, putative [Ixodes scapularis]/gi|215501462|gb|EEC10956.1| valacyclovir hydrolase, putative, partial [Ixodes scapularis]	Ixodes scapularis/Ixodes scapularis	EC:3.1.1.1	Carboxylesterase	IPR000073;IPR000073;IPR029058;noIPR;noIPR;IPR029058
TRINITY_DN100399_c1_g3_i4	valacyclovir hydrolase, putative	2654	1	7.8E-86	70.81%	gi|241646926|ref|XP_002409893.1|valacyclovir hydrolase, putative [Ixodes scapularis]/gi|215501462|gb|EEC10956.1| valacyclovir hydrolase, putative, partial [Ixodes scapularis]	Ixodes scapularis/Ixodes scapularis	EC:3.1.1.1	Carboxylesterase	IPR000073;IPR000073;IPR029058;noIPR;noIPR;IPR029058
TRINITY_DN100399_c1_g3_i5	valacyclovir hydrolase, putative	2634	1	7.8E-86	70.81%	gi|241646926|ref|XP_002409893.1|valacyclovir hydrolase, putative [Ixodes scapularis]/gi|215501462|gb|EEC10956.1| valacyclovir hydrolase, putative, partial [Ixodes scapularis]	Ixodes scapularis/Ixodes scapularis	EC:3.1.1.1	Carboxylesterase	IPR000073;IPR029058;IPR000073;noIPR;noIPR;IPR029058
TRINITY_DN100401_c0_g1_i1	leucine zipper EF-Hand containing transmembrane protein, putative	671	1	1.2E-78	81.11%	gi|241648042|ref|XP_002411197.1|leucine zipper EF-Hand containing transmembrane protein, putative [Ixodes scapularis]/gi|215503827|gb|EEC13321.1| leucine zipper EF-Hand containing transmembrane protein, putative [Ixodes scapularis]	Ixodes scapularis/Ixodes scapularis			IPR011685;noIPR;noIPR
TRINITY_DN100401_c0_g1_i3	leucine zipper EF-Hand containing transmembrane protein, putative	789	1	1.3E-76	85.35%	gi|241648042|ref|XP_002411197.1|leucine zipper EF-Hand containing transmembrane protein, putative [Ixodes scapularis]/gi|215503827|gb|EEC13321.1| leucine zipper EF-Hand containing transmembrane protein, putative [Ixodes scapularis]	Ixodes scapularis/Ixodes scapularis			IPR011685;noIPR;noIPR
TRINITY_DN100401_c0_g1_i5	leucine zipper EF-Hand containing transmembrane protein, putative	749	1	1.9E-74	72.43%	gi|241648042|ref|XP_002411197.1|leucine zipper EF-Hand containing transmembrane protein, putative [Ixodes scapularis]/gi|215503827|gb|EEC13321.1| leucine zipper EF-Hand containing transmembrane protein, putative [Ixodes scapularis]	Ixodes scapularis/Ixodes scapularis			IPR011685;noIPR;noIPR
TRINITY_DN100401_c1_g1_i1	angiotensin-I converting enzyme, putative	1644	1	2.1E-185	81.66%	gi|242001676|ref|XP_002435481.1|angiotensin-I converting enzyme, putative [Ixodes scapularis]/gi|215498817|gb|EEC08311.1| angiotensin-I converting enzyme, putative, partial [Ixodes scapularis]	Ixodes scapularis/Ixodes scapularis	EC:3.4.15	Acting on peptide bonds (peptidases)	IPR001548;IPR001548;noIPR;IPR001548;IPR001548;noIPR
TRINITY_DN100401_c1_g1_i3	angiotensin-I converting enzyme, putative	899	1	6.7E-98	86.85%	gi|242001676|ref|XP_002435481.1|angiotensin-I converting enzyme, putative [Ixodes scapularis]/gi|215498817|gb|EEC08311.1| angiotensin-I converting enzyme, putative, partial [Ixodes scapularis]	Ixodes scapularis/Ixodes scapularis	EC:3.4.15	Acting on peptide bonds (peptidases)	IPR001548;IPR001548;IPR001548;noIPR;noIPR
TRINITY_DN100401_c1_g1_i4	angiotensin-I converting enzyme, putative	4411	1	1.0E-207	82.75%	gi|242001676|ref|XP_002435481.1|angiotensin-I converting enzyme, putative [Ixodes scapularis]/gi|215498817|gb|EEC08311.1| angiotensin-I converting enzyme, putative, partial [Ixodes scapularis]	Ixodes scapularis/Ixodes scapularis	EC:3.4.15	Acting on peptide bonds (peptidases)	IPR001548;IPR001548;IPR001548;IPR001548;noIPR
TRINITY_DN100401_c1_g4_i1	angiotensin-converting enzyme, putative	1355	1	2.7E-10	95.00%	gi|241561458|ref|XP_002401260.1|angiotensin-converting enzyme, putative [Ixodes scapularis]/gi|215501844|gb|EEC11338.1| angiotensin-converting enzyme, putative [Ixodes scapularis]	Ixodes scapularis/Ixodes scapularis	EC:3.4.15	Acting on peptide bonds (peptidases)
TRINITY_DN100402_c1_g1_i3	ecto-NOX disulfide-thiol exchanger, putative	3330	1	1.0E-223	79.71%	gi|241068920|ref|XP_002408530.1|ecto-NOX disulfide-thiol exchanger, putative [Ixodes scapularis]/gi|215492516|gb|EEC02157.1| ecto-NOX disulfide-thiol exchanger, putative, partial [Ixodes scapularis]	Ixodes scapularis/Ixodes scapularis			IPR012677;IPR000504;noIPR;noIPR;noIPR;noIPR;noIPR;noIPR;IPR038876;noIPR;IPR000504;IPR034140;IPR035979
TRINITY_DN100402_c1_g1_i7	ecto-NOX disulfide-thiol exchanger, putative	562	1	3.3E-10	90.00%	gi|241068920|ref|XP_002408530.1|ecto-NOX disulfide-thiol exchanger, putative [Ixodes scapularis]/gi|215492516|gb|EEC02157.1| ecto-NOX disulfide-thiol exchanger, putative, partial [Ixodes scapularis]	Ixodes scapularis/Ixodes scapularis			IPR038876;noIPR
TRINITY_DN100402_c1_g1_i8	ecto-NOX disulfide-thiol exchanger, putative	6380	1	1.5E-223	79.75%	gi|241068920|ref|XP_002408530.1|ecto-NOX disulfide-thiol exchanger, putative [Ixodes scapularis]/gi|215492516|gb|EEC02157.1| ecto-NOX disulfide-thiol exchanger, putative, partial [Ixodes scapularis]	Ixodes scapularis/Ixodes scapularis			IPR000504;IPR012677;noIPR;noIPR;noIPR;noIPR;noIPR;noIPR;IPR038876;noIPR;IPR000504;IPR034140;IPR035979
TRINITY_DN100404_c0_g1_i10	putative RNA-directed DNA polymerase from transposon X-element	584	1	1.1E-16	70.67%	gi|1263135601|gb|PFX31755.1|putative RNA-directed DNA polymerase from transposon X-element [Stylophora pistillata]	Stylophora pistillata			noIPR;noIPR
TRINITY_DN100407_c4_g1_i1	bestrophin-2	638	1	5.1E-84	90.16%	gi|1009599690|ref|XP_015928200.1|bestrophin-2 [Parasteatoda tepidariorum]	Parasteatoda tepidariorum			IPR021134;noIPR;IPR033041;IPR000615
TRINITY_DN100407_c4_g1_i2	Bestrophin-1	1439	1	1.2E-93	60.74%	gi|1355965076|gb|PRD23428.1|Bestrophin-1 [Nephila clavipes]	Nephila clavipes			IPR021134;noIPR;noIPR;noIPR;noIPR;noIPR;noIPR;IPR033041;IPR000615
TRINITY_DN100407_c4_g1_i3	Bestrophin-1	2128	1	1.8E-93	60.74%	gi|1355965076|gb|PRD23428.1|Bestrophin-1 [Nephila clavipes]	Nephila clavipes			IPR021134;noIPR;noIPR;noIPR;noIPR;noIPR;noIPR;IPR033041;IPR000615
TRINITY_DN100407_c4_g2_i1	bestrophin-2-like isoform X1	1093	1	2.1E-122	91.86%	gi|1316191724|ref|XP_023241704.1|bestrophin-2-like isoform X1 [Centruroides sculpturatus]/gi|1316191726|ref|XP_023241705.1| bestrophin-2-like isoform X1 [Centruroides sculpturatus]	Centruroides sculpturatus/Centruroides sculpturatus			IPR021134;IPR033041;IPR000615
TRINITY_DN100407_c4_g2_i14	bestrophin-2-like isoform X2	2119	1	3.5E-97	91.08%	gi|1316191728|ref|XP_023241707.1|bestrophin-2-like isoform X2 [Centruroides sculpturatus]	Centruroides sculpturatus			IPR021134;IPR000615;noIPR
TRINITY_DN100407_c4_g2_i15	bestrophin-2-like isoform X2	2120	1	1.2E-97	90.74%	gi|1316191728|ref|XP_023241707.1|bestrophin-2-like isoform X2 [Centruroides sculpturatus]	Centruroides sculpturatus			IPR021134;IPR000615;noIPR
TRINITY_DN100407_c4_g2_i2	bestrophin-2-like isoform X2	2113	1	3.5E-97	91.08%	gi|1316191728|ref|XP_023241707.1|bestrophin-2-like isoform X2 [Centruroides sculpturatus]	Centruroides sculpturatus			IPR021134;IPR000615;noIPR
TRINITY_DN100407_c4_g2_i4	bestrophin-2-like isoform X2	1454	1	8.3E-98	90.74%	gi|1316191728|ref|XP_023241707.1|bestrophin-2-like isoform X2 [Centruroides sculpturatus]	Centruroides sculpturatus			IPR021134;IPR000615;noIPR
TRINITY_DN100407_c4_g2_i5	bestrophin-2-like isoform X2	1300	1	7.5E-98	90.74%	gi|1316191728|ref|XP_023241707.1|bestrophin-2-like isoform X2 [Centruroides sculpturatus]	Centruroides sculpturatus			IPR021134;IPR000615;noIPR
TRINITY_DN100407_c4_g2_i7	bestrophin-2-like isoform X2	2120	1	1.2E-97	90.74%	gi|1316191728|ref|XP_023241707.1|bestrophin-2-like isoform X2 [Centruroides sculpturatus]	Centruroides sculpturatus			IPR021134;IPR000615;noIPR
TRINITY_DN100408_c0_g1_i1	mbp-1 interacting protein-2A, putative	3439	1	1.7E-61	99.16%	gi|242046506|ref|XP_002399629.1|mbp-1 interacting protein-2A, putative [Ixodes scapularis]/gi|215497559|gb|EEC07053.1| mbp-1 interacting protein-2A, putative [Ixodes scapularis]	Ixodes scapularis/Ixodes scapularis			noIPR;IPR006722;IPR006722;noIPR;IPR011012
TRINITY_DN100408_c0_g1_i2	mbp-1 interacting protein-2A, putative	3424	1	1.3E-61	99.16%	gi|242046506|ref|XP_002399629.1|mbp-1 interacting protein-2A, putative [Ixodes scapularis]/gi|215497559|gb|EEC07053.1| mbp-1 interacting protein-2A, putative [Ixodes scapularis]	Ixodes scapularis/Ixodes scapularis			noIPR;IPR006722;IPR006722;noIPR;IPR011012
TRINITY_DN100408_c0_g1_i4	30S ribosomal protein S12, putative	2065	1	1.9E-55	84.62%	gi|241146854|ref|XP_002405151.1|30S ribosomal protein S12, putative [Ixodes scapularis]/gi|215493693|gb|EEC03334.1| 30S ribosomal protein S12, putative [Ixodes scapularis]	Ixodes scapularis/Ixodes scapularis			IPR006032;noIPR;IPR006032;noIPR;IPR006032;IPR005679;IPR012340
TRINITY_DN100408_c1_g2_i1	integral membrane protein GPR180, putative	2187	1	1.6E-209	83.88%	gi|242046508|ref|XP_002399631.1|integral membrane protein GPR180, putative [Ixodes scapularis]/gi|215497560|gb|EEC07054.1| integral membrane protein GPR180, putative, partial [Ixodes scapularis]	Ixodes scapularis/Ixodes scapularis			IPR019336;noIPR;noIPR;noIPR
TRINITY_DN100409_c3_g1_i1	inhibitor of Bruton tyrosine kinase-like	4640	1	6.3E-256	59.68%	gi|926622051|ref|XP_013776392.1|inhibitor of Bruton tyrosine kinase-like [Limulus polyphemus]	Limulus polyphemus			IPR000408;IPR002110;IPR036770;IPR009091;noIPR;noIPR;noIPR;IPR000408;IPR000210;noIPR;noIPR;noIPR;noIPR;IPR020683;IPR000210;IPR000408;IPR002110;IPR000408;IPR000210;IPR002110;IPR000408;IPR020683;noIPR;IPR009091;IPR036770;IPR011333;IPR011333
TRINITY_DN100409_c3_g1_i2	inhibitor of Bruton tyrosine kinase-like	4648	1	6.3E-256	59.68%	gi|926622051|ref|XP_013776392.1|inhibitor of Bruton tyrosine kinase-like [Limulus polyphemus]	Limulus polyphemus			IPR000408;IPR002110;IPR036770;IPR009091;noIPR;noIPR;noIPR;IPR000408;IPR000210;noIPR;noIPR;noIPR;noIPR;IPR020683;IPR000210;IPR000408;IPR002110;IPR000408;IPR000210;IPR002110;IPR000408;IPR020683;noIPR;IPR009091;IPR036770;IPR011333;IPR011333
TRINITY_DN100410_c4_g1_i2	protocadherin beta-6, putative	2627	1	3.5E-211	82.61%	gi|241156890|ref|XP_002407884.1|protocadherin beta-6, putative [Ixodes scapularis]/gi|215494247|gb|EEC03888.1| protocadherin beta-6, putative, partial [Ixodes scapularis]	Ixodes scapularis/Ixodes scapularis			IPR002126;noIPR;noIPR;noIPR;IPR002126;noIPR;noIPR;noIPR;noIPR;noIPR;noIPR;noIPR;noIPR;noIPR;noIPR;noIPR;noIPR;noIPR;noIPR;noIPR;noIPR;IPR015919;IPR015919;IPR015919;IPR015919
TRINITY_DN100410_c4_g1_i3	protocadherin beta-6, putative	3526	1	4.2E-236	81.49%	gi|241156890|ref|XP_002407884.1|protocadherin beta-6, putative [Ixodes scapularis]/gi|215494247|gb|EEC03888.1| protocadherin beta-6, putative, partial [Ixodes scapularis]	Ixodes scapularis/Ixodes scapularis			IPR002126;IPR002126;noIPR;noIPR;noIPR;noIPR;noIPR;noIPR;noIPR;noIPR;noIPR;noIPR;noIPR;noIPR;noIPR;noIPR;noIPR;noIPR;noIPR;noIPR;noIPR;IPR015919;IPR015919;IPR015919;IPR015919
TRINITY_DN100410_c4_g1_i5	protocadherin beta-6, putative	999	1	5.1E-22	81.01%	gi|241156890|ref|XP_002407884.1|protocadherin beta-6, putative [Ixodes scapularis]/gi|215494247|gb|EEC03888.1| protocadherin beta-6, putative, partial [Ixodes scapularis]	Ixodes scapularis/Ixodes scapularis	EC:1.1.1.1	Alcohol dehydrogenase	noIPR
TRINITY_DN100411_c2_g1_i4	adenosine A3 receptor, putative	7493	1	7.1E-201	59.22%	gi|241236515|ref|XP_002400885.1|adenosine A3 receptor, putative [Ixodes scapularis]/gi|215496079|gb|EEC05720.1| adenosine A3 receptor, putative [Ixodes scapularis]	Ixodes scapularis/Ixodes scapularis			IPR008112;IPR000276;noIPR;IPR032675;IPR001611;IPR032675;noIPR;IPR002172;IPR000276;IPR032675;noIPR;IPR034298;noIPR;IPR034298;IPR017452;IPR002172;noIPR;IPR002172;noIPR;noIPR;IPR036055
TRINITY_DN100412_c4_g1_i1	alpha-N-acetylglucosaminidase-like	3071	1	1.2E-218	68.56%	gi|1316151155|ref|XP_023220747.1|alpha-N-acetylglucosaminidase-like [Centruroides sculpturatus]	Centruroides sculpturatus			noIPR;IPR024240;noIPR;IPR024733;IPR029018;IPR024732;IPR007781;noIPR
TRINITY_DN100412_c4_g1_i2	alpha-N-acetylglucosaminidase isoform X5	997	1	2.9E-57	62.77%	gi|918995575|ref|XP_013404469.1|alpha-N-acetylglucosaminidase isoform X5 [Lingula anatina]	Lingula anatina			noIPR;IPR024732;IPR007781;noIPR
TRINITY_DN100412_c4_g1_i3	alpha-N-acetylglucosaminidase isoform X5	1009	1	1.8E-54	62.84%	gi|918995575|ref|XP_013404469.1|alpha-N-acetylglucosaminidase isoform X5 [Lingula anatina]	Lingula anatina			IPR024732;noIPR;IPR007781;noIPR
TRINITY_DN100412_c4_g1_i4	alpha-N-acetylglucosaminidase-like	3095	1	6.5E-217	67.79%	gi|1316151155|ref|XP_023220747.1|alpha-N-acetylglucosaminidase-like [Centruroides sculpturatus]	Centruroides sculpturatus			IPR029018;noIPR;IPR024733;IPR024240;IPR007781;noIPR
TRINITY_DN100413_c6_g1_i1	complement component 3-like protein	3706	1	6.0E-108	55.79%	gi|33325642|gb|AAQ08323.1|complement component 3-like protein [Carcinoscorpius rotundicauda]	Carcinoscorpius rotundicauda			IPR009048;noIPR;noIPR;IPR036595;IPR011626;noIPR;noIPR;IPR036595;IPR008930
TRINITY_DN100413_c6_g1_i3	complement component 3-like protein	5499	1	2.8E-287	53.69%	gi|33325642|gb|AAQ08323.1|complement component 3-like protein [Carcinoscorpius rotundicauda]	Carcinoscorpius rotundicauda			noIPR;IPR011626;IPR000020;IPR018933;noIPR;IPR041555;IPR041425;noIPR;IPR001599;IPR013783;noIPR;noIPR;IPR040839;noIPR;IPR011625;IPR002890;noIPR;IPR009048;noIPR;IPR001134;IPR000020;noIPR;IPR036595;IPR008993;IPR018081;IPR008930
TRINITY_DN100413_c6_g1_i5	complement component 3-1	2646	1	5.0E-117	52.80%	gi|344178913|dbj|BAK64109.1|complement component 3-1 [Hasarius adansoni]	Hasarius adansoni			noIPR;noIPR;noIPR;IPR041555;IPR001599;IPR000020;noIPR;IPR011625;IPR013783;IPR013783;IPR040839;noIPR;noIPR;noIPR;noIPR;IPR000020;IPR018081
TRINITY_DN100413_c6_g1_i6	complement component 3-like protein	5412	1	4.5E-290	54.70%	gi|33325642|gb|AAQ08323.1|complement component 3-like protein [Carcinoscorpius rotundicauda]	Carcinoscorpius rotundicauda			IPR000020;IPR011626;noIPR;noIPR;noIPR;noIPR;IPR041425;IPR002890;IPR001599;IPR013783;noIPR;noIPR;IPR009048;noIPR;IPR011625;IPR041555;IPR018933;IPR040839;noIPR;IPR001134;IPR000020;noIPR;IPR018081;IPR036595;IPR008930;IPR008993
TRINITY_DN100413_c6_g1_i7	venom factor-like	836	1	3.1E-44	55.16%	gi|926607971|ref|XP_013775397.1|LOW QUALITY PROTEIN: venom factor-like [Limulus polyphemus]	Limulus polyphemus			IPR002890;IPR041555;noIPR;noIPR;noIPR;noIPR
TRINITY_DN100413_c6_g1_i9	complement C3	1973	1	3.3E-89	52.75%	gi|1192748487|ref|XP_021003824.1|complement C3 [Parasteatoda tepidariorum]	Parasteatoda tepidariorum			noIPR;IPR013783;noIPR;IPR000020;IPR011625;IPR001599;noIPR;noIPR;noIPR;noIPR;IPR000020;IPR018081
TRINITY_DN100416_c3_g1_i2	skeletrophin, putative	8519	1	3.5E-289	81.34%	gi|242276482|ref|XP_002404176.2|skeletrophin, putative [Ixodes scapularis]/gi|215491507|gb|EEC01148.1| skeletrophin, putative [Ixodes scapularis]	Ixodes scapularis/Ixodes scapularis			IPR002110;IPR040847;IPR000433;IPR020683;noIPR;IPR036770;IPR037252;noIPR;IPR037252;noIPR;IPR010606;IPR013083;IPR013083;noIPR;IPR020683;IPR002110;IPR010606;IPR002110;IPR001841;IPR002110;IPR000433;IPR001841;IPR002110;IPR010606;IPR020683;noIPR;IPR020683;noIPR;IPR020683;IPR037252;noIPR;IPR037252;IPR036770
TRINITY_DN100416_c3_g1_i3	skeletrophin, putative	8520	1	3.5E-289	81.34%	gi|242276482|ref|XP_002404176.2|skeletrophin, putative [Ixodes scapularis]/gi|215491507|gb|EEC01148.1| skeletrophin, putative [Ixodes scapularis]	Ixodes scapularis/Ixodes scapularis			IPR002110;IPR040847;IPR000433;IPR020683;noIPR;IPR036770;IPR037252;noIPR;IPR037252;noIPR;IPR010606;IPR013083;IPR013083;noIPR;IPR020683;IPR002110;IPR010606;IPR002110;IPR001841;IPR002110;IPR000433;IPR001841;IPR002110;IPR010606;IPR020683;noIPR;noIPR;IPR020683;IPR020683;IPR037252;noIPR;IPR037252;IPR036770
TRINITY_DN100416_c3_g1_i4	skeletrophin, putative	1922	1	3.4E-216	83.58%	gi|242276482|ref|XP_002404176.2|skeletrophin, putative [Ixodes scapularis]/gi|215491507|gb|EEC01148.1| skeletrophin, putative [Ixodes scapularis]	Ixodes scapularis/Ixodes scapularis			IPR040847;IPR010606;IPR037252;IPR000433;IPR037252;noIPR;noIPR;IPR000433;IPR010606;IPR010606;noIPR;IPR037252;IPR037252
TRINITY_DN100417_c4_g1_i1	ATP-binding cassette sub-family A member 1-like	798	1	3.8E-20	72.53%	gi|926615426|ref|XP_013772792.1|ATP-binding cassette sub-family A member 1-like [Limulus polyphemus]	Limulus polyphemus	EC:3.6.1.3;EC:3.6.1.15	Adenosinetriphosphatase;Nucleoside-triphosphate phosphatase	noIPR;IPR026082
TRINITY_DN100417_c4_g1_i2	ATP-binding cassette sub-family A member 1-like	898	1	2.3E-37	75.19%	gi|926615426|ref|XP_013772792.1|ATP-binding cassette sub-family A member 1-like [Limulus polyphemus]	Limulus polyphemus	EC:3.6.1.3;EC:3.6.1.15	Adenosinetriphosphatase;Nucleoside-triphosphate phosphatase	noIPR;IPR026082
TRINITY_DN100417_c4_g2_i1	ATP-binding cassette sub-family A member 1-like	4427	1	7.3E-278	70.99%	gi|1316181938|ref|XP_023236608.1|ATP-binding cassette sub-family A member 1-like [Centruroides sculpturatus]	Centruroides sculpturatus	EC:3.6.1.3;EC:3.6.1.15	Adenosinetriphosphatase;Nucleoside-triphosphate phosphatase	IPR003439;noIPR;noIPR;noIPR;noIPR;IPR026082;IPR030371;IPR003439;noIPR;IPR027417
TRINITY_DN100417_c4_g2_i3	ATP-binding cassette sub-family A member 1-like	4488	1	0.0E0	66.72%	gi|926615426|ref|XP_013772792.1|ATP-binding cassette sub-family A member 1-like [Limulus polyphemus]	Limulus polyphemus	EC:3.6.1.3;EC:3.6.1.15	Adenosinetriphosphatase;Nucleoside-triphosphate phosphatase	noIPR;IPR003439;noIPR;noIPR;noIPR;IPR026082;IPR030371;IPR003439;noIPR;IPR027417
TRINITY_DN100418_c3_g1_i5	transcriptional factor nfil3/e4bp4, putative	5831	1	2.3E-61	50.68%	gi|241997894|ref|XP_002433590.1|transcriptional factor nfil3/e4bp4, putative [Ixodes scapularis]/gi|215495349|gb|EEC04990.1| transcriptional factor nfil3/e4bp4, putative [Ixodes scapularis]	Ixodes scapularis/Ixodes scapularis			noIPR;IPR004827;noIPR;noIPR;noIPR;noIPR;noIPR;noIPR;noIPR;noIPR;noIPR;noIPR;IPR004827;noIPR;noIPR
TRINITY_DN100420_c1_g1_i1	TPA_inf: hypoxanthine-guanine phosphoribosyltransferase	635	1	4.8E-42	97.87%	gi|325303198|tpg|DAA34685.1|TPA_inf: hypoxanthine-guanine phosphoribosyltransferase [Amblyomma variegatum]	Amblyomma variegatum			noIPR;IPR000836;noIPR;IPR000836;IPR029057
TRINITY_DN100420_c1_g1_i2	TPA_inf: hypoxanthine-guanine phosphoribosyltransferase	722	1	1.3E-115	97.27%	gi|325303198|tpg|DAA34685.1|TPA_inf: hypoxanthine-guanine phosphoribosyltransferase [Amblyomma variegatum]	Amblyomma variegatum	EC:2.4.2.8	Hypoxanthine phosphoribosyltransferase	noIPR;IPR005904;IPR000836;noIPR;IPR000836;IPR029057
TRINITY_DN100420_c1_g1_i3	TPA_inf: hypoxanthine-guanine phosphoribosyltransferase	908	1	1.1E-116	97.73%	gi|325303198|tpg|DAA34685.1|TPA_inf: hypoxanthine-guanine phosphoribosyltransferase [Amblyomma variegatum]	Amblyomma variegatum	EC:2.4.2.8	Hypoxanthine phosphoribosyltransferase	noIPR;IPR005904;IPR000836;noIPR;IPR000836;IPR029057
TRINITY_DN100420_c2_g1_i2	putative sodium-dependent multivitamin transporter isoform X1	2224	1	3.5E-180	79.55%	gi|1238835800|ref|XP_022237184.1|putative sodium-dependent multivitamin transporter isoform X1 [Limulus polyphemus]/gi|1238835802|ref|XP_022237185.1| putative sodium-dependent multivitamin transporter isoform X1 [Limulus polyphemus]	Limulus polyphemus/Limulus polyphemus			IPR001734;IPR001734;IPR038377;noIPR;IPR001734;noIPR
TRINITY_DN100420_c2_g1_i3	putative sodium-dependent multivitamin transporter isoform X1	7394	1	2.9E-194	77.00%	gi|1238835800|ref|XP_022237184.1|putative sodium-dependent multivitamin transporter isoform X1 [Limulus polyphemus]/gi|1238835802|ref|XP_022237185.1| putative sodium-dependent multivitamin transporter isoform X1 [Limulus polyphemus]	Limulus polyphemus/Limulus polyphemus			IPR038377;IPR001734;IPR001734;noIPR;IPR001734;noIPR
TRINITY_DN100420_c2_g1_i6	putative sodium-dependent multivitamin transporter isoform X1	7364	1	2.8E-194	77.00%	gi|1238835800|ref|XP_022237184.1|putative sodium-dependent multivitamin transporter isoform X1 [Limulus polyphemus]/gi|1238835802|ref|XP_022237185.1| putative sodium-dependent multivitamin transporter isoform X1 [Limulus polyphemus]	Limulus polyphemus/Limulus polyphemus			IPR001734;IPR001734;IPR038377;noIPR;IPR001734;noIPR
TRINITY_DN100422_c3_g1_i1	hypothetical protein IscW_ISCW011075	3012	1	9.9E-61	69.35%	gi|241672114|ref|XP_002411446.1|hypothetical protein IscW_ISCW011075 [Ixodes scapularis]/gi|215504097|gb|EEC13591.1| hypothetical protein IscW_ISCW011075, partial [Ixodes scapularis]	Ixodes scapularis/Ixodes scapularis			noIPR;noIPR;noIPR;noIPR;noIPR;noIPR;noIPR;noIPR;noIPR;noIPR;noIPR;noIPR;noIPR;noIPR;noIPR;noIPR
TRINITY_DN100422_c3_g1_i2	hypothetical protein IscW_ISCW011075	911	1	1.4E-13	84.93%	gi|241672114|ref|XP_002411446.1|hypothetical protein IscW_ISCW011075 [Ixodes scapularis]/gi|215504097|gb|EEC13591.1| hypothetical protein IscW_ISCW011075, partial [Ixodes scapularis]	Ixodes scapularis/Ixodes scapularis			noIPR;noIPR;noIPR
TRINITY_DN100423_c4_g1_i1	transporter, putative	668	1	7.1E-20	56.25%	gi|241642055|ref|XP_002411022.1|transporter, putative [Ixodes scapularis]/gi|215503666|gb|EEC13160.1| transporter, putative, partial [Ixodes scapularis]	Ixodes scapularis/Ixodes scapularis			noIPR;IPR005828;noIPR;noIPR;noIPR;IPR020846;IPR020846;IPR036259
TRINITY_DN100423_c4_g2_i1	sugar transporter, putative	729	1	5.4E-13	50.68%	gi|241050539|ref|XP_002407405.1|sugar transporter, putative [Ixodes scapularis]/gi|215492216|gb|EEC01857.1| sugar transporter, putative [Ixodes scapularis]	Ixodes scapularis/Ixodes scapularis			noIPR;IPR005828;noIPR;noIPR;noIPR;noIPR;noIPR;IPR036259
TRINITY_DN100426_c1_g1_i2	major facilitator superfamily domain-containing protein 6-like	4256	1	2.0E-43	65.33%	gi|1316160887|ref|XP_023225634.1|major facilitator superfamily domain-containing protein 6-like [Centruroides sculpturatus]	Centruroides sculpturatus			noIPR;noIPR;noIPR
TRINITY_DN100426_c1_g1_i7	major facilitator superfamily domain-containing protein 6-like	6046	1	7.6E-262	75.73%	gi|1316160887|ref|XP_023225634.1|major facilitator superfamily domain-containing protein 6-like [Centruroides sculpturatus]	Centruroides sculpturatus			noIPR;noIPR;IPR024989;noIPR;noIPR;noIPR;noIPR;noIPR;noIPR;noIPR;noIPR;noIPR;IPR020846;IPR020846;IPR036259
TRINITY_DN100428_c2_g1_i10	Tumor necrosis factor receptor-associated factor-like protein	555	1	1.1E-37	64.24%	gi|696123067|gb|AIT40222.1|Tumor necrosis factor receptor-associated factor-like protein [Rhipicephalus microplus]	Rhipicephalus microplus			IPR013083;noIPR;IPR027139;IPR001841;noIPR;IPR008974
TRINITY_DN100428_c2_g1_i11	Tumor necrosis factor receptor-associated factor-like protein	538	1	4.7E-22	56.21%	gi|696123067|gb|AIT40222.1|Tumor necrosis factor receptor-associated factor-like protein [Rhipicephalus microplus]	Rhipicephalus microplus			IPR013083;IPR027139;noIPR;IPR008974
TRINITY_DN100428_c2_g1_i12	Tumor necrosis factor receptor-associated factor-like protein	636	1	9.2E-33	64.23%	gi|696123067|gb|AIT40222.1|Tumor necrosis factor receptor-associated factor-like protein [Rhipicephalus microplus]	Rhipicephalus microplus			noIPR;IPR013083;IPR027139;noIPR;IPR001841;noIPR;noIPR
TRINITY_DN100428_c2_g1_i3	Tumor necrosis factor receptor-associated factor-like protein	960	1	2.1E-20	54.90%	gi|696123067|gb|AIT40222.1|Tumor necrosis factor receptor-associated factor-like protein [Rhipicephalus microplus]	Rhipicephalus microplus			IPR013083;noIPR;IPR027139;IPR008974
TRINITY_DN100428_c2_g1_i7	Tumor necrosis factor receptor-associated factor-like protein	996	1	3.9E-14	55.47%	gi|696123067|gb|AIT40222.1|Tumor necrosis factor receptor-associated factor-like protein [Rhipicephalus microplus]	Rhipicephalus microplus
TRINITY_DN100429_c3_g2_i1	piggyBac transposable element-derived protein 4-like	1669	1	4.8E-49	60.83%	gi|1191061546|ref|XP_020909061.1|piggyBac transposable element-derived protein 4-like [Exaiptasia pallida]	Exaiptasia pallida			IPR032718;IPR029526;noIPR
TRINITY_DN100429_c3_g3_i1	piggyBac transposable element-derived protein 4-like	921	1	6.0E-17	61.90%	gi|1270053999|ref|XP_022789269.1|piggyBac transposable element-derived protein 4-like [Stylophora pistillata]/gi|1270073412|ref|XP_022799680.1| piggyBac transposable element-derived protein 4-like [Stylophora pistillata]/gi|1270094080|ref|XP_022777504.1| piggyBac transposable element-derived protein 4-like [Stylophora pistillata]/gi|1263114273|gb|PFX12034.1| PiggyBac transposable element-derived …	Stylophora pistillata/Stylophora pistillata/Stylophora pistillata/Stylophora pistillata/Stylophora pistillata			IPR029526;noIPR;noIPR
TRINITY_DN100430_c4_g1_i1	amine oxidase [flavin-containing] B	2459	1	1.1E-137	66.46%	gi|524978419|ref|XP_005037297.1|PREDICTED: amine oxidase [flavin-containing] B [Ficedula albicollis]	Ficedula albicollis			IPR001613;IPR002937;noIPR;IPR036188;noIPR;noIPR;noIPR;IPR036188;noIPR
TRINITY_DN100430_c4_g1_i2	amine oxidase [flavin-containing] B-like	2347	1	4.0E-110	64.81%	gi|733873018|ref|XP_010722323.1|PREDICTED: amine oxidase [flavin-containing] B-like [Meleagris gallopavo]	Meleagris gallopavo			IPR001613;IPR036188;noIPR;IPR002937;noIPR;noIPR;noIPR;IPR036188;noIPR
TRINITY_DN100430_c4_g1_i4	amine oxidase [flavin-containing] B	2492	1	1.1E-137	66.46%	gi|524978419|ref|XP_005037297.1|PREDICTED: amine oxidase [flavin-containing] B [Ficedula albicollis]	Ficedula albicollis			IPR001613;noIPR;IPR036188;IPR002937;noIPR;noIPR;noIPR;IPR036188
TRINITY_DN100431_c6_g1_i1	conserved hypothetical protein	2471	1	8.0E-24	63.33%	gi|241738331|ref|XP_002414071.1|conserved hypothetical protein [Ixodes scapularis]/gi|215507925|gb|EEC17379.1| conserved hypothetical protein [Ixodes scapularis]	Ixodes scapularis/Ixodes scapularis			noIPR;noIPR
TRINITY_DN100433_c0_g1_i10	RNA-directed DNA polymerase from mobile element jockey	519	1	6.0E-6	55.42%	gi|999976685|gb|KXJ15859.1|RNA-directed DNA polymerase from mobile element jockey [Exaiptasia pallida]	Exaiptasia pallida
TRINITY_DN100433_c0_g1_i7	AF134586_1reverse transcriptase-like protein	619	1	2.1E-10	50.40%	gi|5081602|gb|AAD39461.1|AF134586_1reverse transcriptase-like protein, partial [Amblyomma americanum]	Amblyomma americanum
TRINITY_DN100433_c1_g1_i3	PREDICTED: uncharacterized protein LOC109196584	1775	1	1.4E-9	53.17%	gi|1110932469|ref|XP_019206348.1|PREDICTED: uncharacterized protein LOC109196584 [Oreochromis niloticus]	Oreochromis niloticus
TRINITY_DN100433_c1_g1_i8	PREDICTED: uncharacterized protein LOC109196584	1735	1	1.3E-9	53.17%	gi|1110932469|ref|XP_019206348.1|PREDICTED: uncharacterized protein LOC109196584 [Oreochromis niloticus]	Oreochromis niloticus
TRINITY_DN100435_c3_g1_i1	putative nuclease HARBI1	1104	1	6.8E-68	58.60%	gi|768430464|ref|XP_011556459.1|PREDICTED: putative nuclease HARBI1 [Plutella xylostella]	Plutella xylostella			IPR027806;noIPR;noIPR;noIPR
TRINITY_DN100435_c3_g1_i10	putative nuclease HARBI1	705	1	1.8E-37	66.29%	gi|768430464|ref|XP_011556459.1|PREDICTED: putative nuclease HARBI1 [Plutella xylostella]	Plutella xylostella			noIPR;noIPR
TRINITY_DN100435_c3_g1_i11	putative nuclease HARBI1	1471	1	7.2E-57	65.56%	gi|768430464|ref|XP_011556459.1|PREDICTED: putative nuclease HARBI1 [Plutella xylostella]	Plutella xylostella			IPR027806;noIPR;noIPR
TRINITY_DN100435_c3_g1_i13	putative nuclease HARBI1	2095	1	1.0E-56	65.56%	gi|768430464|ref|XP_011556459.1|PREDICTED: putative nuclease HARBI1 [Plutella xylostella]	Plutella xylostella			IPR027806;noIPR;noIPR
TRINITY_DN100435_c3_g1_i14	putative nuclease HARBI1	1451	1	3.6E-77	62.39%	gi|768430464|ref|XP_011556459.1|PREDICTED: putative nuclease HARBI1 [Plutella xylostella]	Plutella xylostella			IPR027806;noIPR;noIPR;noIPR
TRINITY_DN100435_c3_g1_i2	putative nuclease HARBI1	1652	1	8.1E-57	65.56%	gi|768430464|ref|XP_011556459.1|PREDICTED: putative nuclease HARBI1 [Plutella xylostella]	Plutella xylostella			IPR027806;noIPR;noIPR
TRINITY_DN100435_c3_g1_i3	putative nuclease HARBI1	1961	1	4.9E-77	62.39%	gi|768430464|ref|XP_011556459.1|PREDICTED: putative nuclease HARBI1 [Plutella xylostella]	Plutella xylostella			IPR027806;noIPR;noIPR;noIPR
TRINITY_DN100435_c3_g1_i4	putative nuclease HARBI1	2057	1	5.2E-77	62.39%	gi|768430464|ref|XP_011556459.1|PREDICTED: putative nuclease HARBI1 [Plutella xylostella]	Plutella xylostella			IPR027806;noIPR;noIPR;noIPR
TRINITY_DN100435_c3_g1_i5	putative nuclease HARBI1	1999	1	9.8E-57	65.56%	gi|768430464|ref|XP_011556459.1|PREDICTED: putative nuclease HARBI1 [Plutella xylostella]	Plutella xylostella			IPR027806;noIPR;noIPR
TRINITY_DN100435_c3_g1_i6	putative nuclease HARBI1	1386	1	1.2E-77	62.21%	gi|768430464|ref|XP_011556459.1|PREDICTED: putative nuclease HARBI1 [Plutella xylostella]	Plutella xylostella			IPR027806;noIPR;noIPR;noIPR
TRINITY_DN100435_c3_g1_i7	putative nuclease HARBI1	1489	1	7.3E-57	65.56%	gi|768430464|ref|XP_011556459.1|PREDICTED: putative nuclease HARBI1 [Plutella xylostella]	Plutella xylostella			IPR027806;noIPR;noIPR
TRINITY_DN100435_c3_g1_i8	putative nuclease HARBI1	1433	1	6.1E-77	62.39%	gi|768430464|ref|XP_011556459.1|PREDICTED: putative nuclease HARBI1 [Plutella xylostella]	Plutella xylostella			IPR027806;noIPR;noIPR;noIPR
TRINITY_DN100435_c3_g1_i9	putative nuclease HARBI1	1614	1	3.1E-77	62.39%	gi|768430464|ref|XP_011556459.1|PREDICTED: putative nuclease HARBI1 [Plutella xylostella]	Plutella xylostella			IPR027806;noIPR;noIPR;noIPR
TRINITY_DN100437_c0_g1_i14	RHTO0S10e01222g1_1	1095	1	7.9E-16	63.48%	gi|647399847|emb|CDR44818.1|RHTO0S10e01222g1_1 [Rhodotorula toruloides]	Rhodotorula toruloides
TRINITY_DN100437_c0_g1_i6	RHTO0S10e01222g1_1	1071	1	7.7E-16	63.48%	gi|647399847|emb|CDR44818.1|RHTO0S10e01222g1_1 [Rhodotorula toruloides]	Rhodotorula toruloides
TRINITY_DN100437_c0_g1_i7	RHTO0S10e01222g1_1	1058	1	7.6E-16	63.48%	gi|647399847|emb|CDR44818.1|RHTO0S10e01222g1_1 [Rhodotorula toruloides]	Rhodotorula toruloides
TRINITY_DN100437_c1_g2_i1	hypothetical protein IscW_ISCW003083	754	1	1.6E-7	53.03%	gi|241122821|ref|XP_002403702.1|hypothetical protein IscW_ISCW003083 [Ixodes scapularis]/gi|215493504|gb|EEC03145.1| hypothetical protein IscW_ISCW003083 [Ixodes scapularis]	Ixodes scapularis/Ixodes scapularis			noIPR
TRINITY_DN100439_c6_g1_i2	elongator complex protein 2-like	3657	1	6.5E-208	61.81%	gi|1316137051|ref|XP_023238736.1|elongator complex protein 2-like [Centruroides sculpturatus]	Centruroides sculpturatus			IPR015943;IPR015943;IPR015943;IPR015943;IPR001680;IPR037289;IPR001680;IPR001680;IPR017986;IPR017986;IPR017986;IPR036322
TRINITY_DN100439_c6_g1_i3	elongator complex protein 2-like	2908	1	5.0E-211	63.20%	gi|1316137051|ref|XP_023238736.1|elongator complex protein 2-like [Centruroides sculpturatus]	Centruroides sculpturatus			IPR015943;IPR015943;IPR001680;IPR015943;IPR015943;IPR015943;IPR037289;IPR001680;IPR017986;IPR017986;IPR001680;IPR036322;IPR036322;IPR036322
TRINITY_DN100439_c6_g1_i4	elongator complex protein 2-like	3590	1	8.1E-211	63.20%	gi|1316137051|ref|XP_023238736.1|elongator complex protein 2-like [Centruroides sculpturatus]	Centruroides sculpturatus			IPR015943;IPR015943;IPR001680;IPR015943;IPR015943;IPR015943;IPR037289;IPR001680;IPR017986;IPR017986;IPR001680;IPR036322;IPR036322;IPR036322
TRINITY_DN100441_c3_g1_i2	pol polyprotein	4519	1	5.7E-60	55.80%	gi|599127480|gb|AHN53418.1|pol polyprotein [Nuttalliella namaqua]	Nuttalliella namaqua			noIPR
TRINITY_DN100441_c3_g1_i3	pol polyprotein	562	1	1.2E-7	56.94%	gi|599127480|gb|AHN53418.1|pol polyprotein [Nuttalliella namaqua]	Nuttalliella namaqua
TRINITY_DN100441_c3_g1_i4	pol polyprotein	2696	1	2.5E-10	52.85%	gi|599127480|gb|AHN53418.1|pol polyprotein [Nuttalliella namaqua]	Nuttalliella namaqua
TRINITY_DN100441_c3_g1_i5	pol polyprotein	1825	1	9.4E-22	55.88%	gi|599127480|gb|AHN53418.1|pol polyprotein [Nuttalliella namaqua]	Nuttalliella namaqua
TRINITY_DN100442_c3_g2_i2	dehydrogenase, putative	2920	1	2.3E-46	74.70%	gi|241998376|ref|XP_002433831.1|dehydrogenase, putative [Ixodes scapularis]/gi|215495590|gb|EEC05231.1| dehydrogenase, putative, partial [Ixodes scapularis]	Ixodes scapularis/Ixodes scapularis			IPR002347;IPR002347;noIPR;noIPR;noIPR;noIPR;IPR036291
TRINITY_DN100442_c3_g2_i3	dehydrogenase, putative	2470	1	6.7E-55	76.22%	gi|241998376|ref|XP_002433831.1|dehydrogenase, putative [Ixodes scapularis]/gi|215495590|gb|EEC05231.1| dehydrogenase, putative, partial [Ixodes scapularis]	Ixodes scapularis/Ixodes scapularis			IPR002347;IPR002347;noIPR;noIPR;noIPR;noIPR;IPR036291
TRINITY_DN100442_c3_g2_i4	dehydrogenase, putative	2583	1	4.5E-46	74.12%	gi|241998376|ref|XP_002433831.1|dehydrogenase, putative [Ixodes scapularis]/gi|215495590|gb|EEC05231.1| dehydrogenase, putative, partial [Ixodes scapularis]	Ixodes scapularis/Ixodes scapularis			IPR002347;IPR002347;noIPR;noIPR;noIPR;noIPR;IPR036291
TRINITY_DN100442_c3_g2_i6	dehydrogenase, putative	2890	1	1.4E-27	77.45%	gi|241998376|ref|XP_002433831.1|dehydrogenase, putative [Ixodes scapularis]/gi|215495590|gb|EEC05231.1| dehydrogenase, putative, partial [Ixodes scapularis]	Ixodes scapularis/Ixodes scapularis			IPR002347;noIPR;IPR002347;noIPR;noIPR;IPR036291
TRINITY_DN100443_c4_g1_i1	protein unc-79-like	1409	1	6.1E-154	86.40%	gi|1173908777|gb|OQR74278.1|protein unc-79-like [Tropilaelaps mercedesae]	Tropilaelaps mercedesae			IPR024855
TRINITY_DN100443_c4_g1_i2	uncharacterized protein LOC111083062, partial	690	1	2.8E-19	90.16%	gi|1238896128|ref|XP_022234996.1|uncharacterized protein LOC111083062, partial [Limulus polyphemus]	Limulus polyphemus
TRINITY_DN100443_c4_g1_i5	protein unc-79-like	2202	1	1.8E-205	87.05%	gi|1173908777|gb|OQR74278.1|protein unc-79-like [Tropilaelaps mercedesae]	Tropilaelaps mercedesae			IPR024855
TRINITY_DN100443_c4_g1_i6	protein unc-79-like	2187	1	8.2E-206	87.93%	gi|1173908777|gb|OQR74278.1|protein unc-79-like [Tropilaelaps mercedesae]	Tropilaelaps mercedesae			IPR024855
TRINITY_DN100443_c4_g1_i7	uncharacterized protein LOC111083062, partial	709	1	5.4E-26	88.16%	gi|1238896128|ref|XP_022234996.1|uncharacterized protein LOC111083062, partial [Limulus polyphemus]	Limulus polyphemus
TRINITY_DN100445_c2_g1_i2	constitutive coactivator of peroxisome proliferator-activated receptor gamma-like	600	1	2.3E-17	59.84%	gi|1126178467|ref|XP_019621591.1|PREDICTED: LOW QUALITY PROTEIN: constitutive coactivator of peroxisome proliferator-activated receptor gamma-like [Branchiostoma belcheri]	Branchiostoma belcheri			noIPR;IPR026784;IPR029060
TRINITY_DN100445_c2_g1_i8	conserved hypothetical protein	1989	1	1.0E-53	73.18%	gi|240951963|ref|XP_002399284.1|conserved hypothetical protein [Ixodes scapularis]/gi|215490508|gb|EEC00151.1| conserved hypothetical protein, partial [Ixodes scapularis]	Ixodes scapularis/Ixodes scapularis			noIPR;IPR026784;noIPR;IPR029060
TRINITY_DN100446_c4_g1_i1	conserved hypothetical protein	5897	1	1.1E-191	89.16%	gi|241702186|ref|XP_002413194.1|conserved hypothetical protein [Ixodes scapularis]/gi|215507008|gb|EEC16502.1| conserved hypothetical protein [Ixodes scapularis]	Ixodes scapularis/Ixodes scapularis			IPR010378;noIPR;IPR010378
TRINITY_DN100446_c4_g1_i2	conserved hypothetical protein	5885	1	1.1E-191	89.16%	gi|241702186|ref|XP_002413194.1|conserved hypothetical protein [Ixodes scapularis]/gi|215507008|gb|EEC16502.1| conserved hypothetical protein [Ixodes scapularis]	Ixodes scapularis/Ixodes scapularis			IPR010378;noIPR;IPR010378
TRINITY_DN100447_c1_g1_i10	mutS protein homolog 5-like isoform X2	685	1	1.2E-49	70.37%	gi|1242755309|ref|XP_022316571.1|mutS protein homolog 5-like isoform X2 [Crassostrea virginica]	Crassostrea virginica			noIPR;IPR000432;noIPR;noIPR;IPR027417
TRINITY_DN100447_c1_g1_i11	mutS protein homolog 5-like isoform X1	4997	1	3.6E-164	61.41%	gi|1207966600|ref|XP_021373866.1|mutS protein homolog 5-like isoform X1 [Mizuhopecten yessoensis]/gi|1207966602|ref|XP_021373867.1| mutS protein homolog 5-like isoform X1 [Mizuhopecten yessoensis]/gi|1205889755|gb|OWF40626.1| MutS protein-like 5 [Mizuhopecten yessoensis]	Mizuhopecten yessoensis/Mizuhopecten yessoensis/Mizuhopecten yessoensis			IPR007696;noIPR;IPR011184;IPR000432;noIPR;noIPR;noIPR;noIPR;IPR027417;IPR036187
TRINITY_DN100447_c1_g1_i12	mutS protein homolog 5-like isoform X1	3959	1	1.2E-103	60.84%	gi|1207966600|ref|XP_021373866.1|mutS protein homolog 5-like isoform X1 [Mizuhopecten yessoensis]/gi|1207966602|ref|XP_021373867.1| mutS protein homolog 5-like isoform X1 [Mizuhopecten yessoensis]/gi|1205889755|gb|OWF40626.1| MutS protein-like 5 [Mizuhopecten yessoensis]	Mizuhopecten yessoensis/Mizuhopecten yessoensis/Mizuhopecten yessoensis			noIPR;IPR007696;noIPR;noIPR;noIPR;IPR036187
TRINITY_DN100447_c1_g1_i14	mutS protein homolog 5-like isoform X1	4029	1	1.2E-88	62.95%	gi|1207966600|ref|XP_021373866.1|mutS protein homolog 5-like isoform X1 [Mizuhopecten yessoensis]/gi|1207966602|ref|XP_021373867.1| mutS protein homolog 5-like isoform X1 [Mizuhopecten yessoensis]/gi|1205889755|gb|OWF40626.1| MutS protein-like 5 [Mizuhopecten yessoensis]	Mizuhopecten yessoensis/Mizuhopecten yessoensis/Mizuhopecten yessoensis			IPR007696;noIPR;noIPR;noIPR;noIPR;IPR036187
TRINITY_DN100447_c1_g1_i17	conserved hypothetical protein	2021	1	2.5E-31	94.05%	gi|242002660|ref|XP_002435973.1|conserved hypothetical protein [Ixodes scapularis]/gi|215499309|gb|EEC08803.1| conserved hypothetical protein, partial [Ixodes scapularis]	Ixodes scapularis/Ixodes scapularis			IPR031821;noIPR;noIPR;noIPR;IPR031821
TRINITY_DN100447_c1_g1_i18	mutS protein homolog 5-like isoform X1	5059	1	1.9E-152	62.63%	gi|1207966600|ref|XP_021373866.1|mutS protein homolog 5-like isoform X1 [Mizuhopecten yessoensis]/gi|1207966602|ref|XP_021373867.1| mutS protein homolog 5-like isoform X1 [Mizuhopecten yessoensis]/gi|1205889755|gb|OWF40626.1| MutS protein-like 5 [Mizuhopecten yessoensis]	Mizuhopecten yessoensis/Mizuhopecten yessoensis/Mizuhopecten yessoensis			noIPR;noIPR;IPR007696;IPR000432;IPR011184;noIPR;noIPR;noIPR;IPR027417;IPR036187
TRINITY_DN100447_c1_g1_i19	mutS protein homolog 5-like isoform X1	5074	1	1.1E-163	63.19%	gi|1207966600|ref|XP_021373866.1|mutS protein homolog 5-like isoform X1 [Mizuhopecten yessoensis]/gi|1207966602|ref|XP_021373867.1| mutS protein homolog 5-like isoform X1 [Mizuhopecten yessoensis]/gi|1205889755|gb|OWF40626.1| MutS protein-like 5 [Mizuhopecten yessoensis]	Mizuhopecten yessoensis/Mizuhopecten yessoensis/Mizuhopecten yessoensis			noIPR;noIPR;noIPR;IPR011184;IPR000432;IPR007696;noIPR;noIPR;IPR027417;IPR036187
TRINITY_DN100447_c1_g1_i3	mutS protein homolog 5-like isoform X1	5067	1	7.3E-149	62.67%	gi|1207966600|ref|XP_021373866.1|mutS protein homolog 5-like isoform X1 [Mizuhopecten yessoensis]/gi|1207966602|ref|XP_021373867.1| mutS protein homolog 5-like isoform X1 [Mizuhopecten yessoensis]/gi|1205889755|gb|OWF40626.1| MutS protein-like 5 [Mizuhopecten yessoensis]	Mizuhopecten yessoensis/Mizuhopecten yessoensis/Mizuhopecten yessoensis			noIPR;IPR011184;noIPR;IPR007696;IPR000432;noIPR;noIPR;noIPR;IPR027417;IPR036187
TRINITY_DN100447_c1_g1_i4	conserved hypothetical protein	1421	1	2.3E-31	94.05%	gi|242002660|ref|XP_002435973.1|conserved hypothetical protein [Ixodes scapularis]/gi|215499309|gb|EEC08803.1| conserved hypothetical protein, partial [Ixodes scapularis]	Ixodes scapularis/Ixodes scapularis			IPR031821;IPR031821
TRINITY_DN100447_c1_g1_i6	conserved hypothetical protein	2617	1	3.2E-31	94.05%	gi|242002660|ref|XP_002435973.1|conserved hypothetical protein [Ixodes scapularis]/gi|215499309|gb|EEC08803.1| conserved hypothetical protein, partial [Ixodes scapularis]	Ixodes scapularis/Ixodes scapularis			IPR031821;noIPR;noIPR;noIPR;IPR031821
TRINITY_DN100447_c1_g1_i7	conserved hypothetical protein	2332	1	2.8E-31	94.05%	gi|242002660|ref|XP_002435973.1|conserved hypothetical protein [Ixodes scapularis]/gi|215499309|gb|EEC08803.1| conserved hypothetical protein, partial [Ixodes scapularis]	Ixodes scapularis/Ixodes scapularis			IPR031821;noIPR;noIPR;noIPR;IPR031821
TRINITY_DN100447_c1_g1_i9	DNA polymerase epsilon subunit 4-like isoform X1	2341	1	8.1E-26	78.85%	gi|1316188280|ref|XP_023239934.1|DNA polymerase epsilon subunit 4-like isoform X1 [Centruroides sculpturatus]	Centruroides sculpturatus			IPR003958;IPR009072;noIPR;noIPR;IPR009072
TRINITY_DN100448_c1_g1_i2	conserved hypothetical protein	2463	1	6.0E-80	81.45%	gi|241857587|ref|XP_002416105.1|conserved hypothetical protein [Ixodes scapularis]/gi|215510319|gb|EEC19772.1| conserved hypothetical protein [Ixodes scapularis]	Ixodes scapularis/Ixodes scapularis			IPR018616;IPR018616
TRINITY_DN100448_c1_g1_i3	conserved hypothetical protein	2445	1	5.9E-80	81.45%	gi|241857587|ref|XP_002416105.1|conserved hypothetical protein [Ixodes scapularis]/gi|215510319|gb|EEC19772.1| conserved hypothetical protein [Ixodes scapularis]	Ixodes scapularis/Ixodes scapularis			IPR018616;IPR018616
TRINITY_DN100449_c5_g3_i1	conserved hypothetical protein	3135	1	8.7E-68	73.94%	gi|241630745|ref|XP_002410191.1|conserved hypothetical protein [Ixodes scapularis]/gi|215503335|gb|EEC12829.1| conserved hypothetical protein [Ixodes scapularis]	Ixodes scapularis/Ixodes scapularis			noIPR;noIPR;noIPR;noIPR;noIPR;noIPR
TRINITY_DN100450_c1_g1_i1	eukaryotic translation initiation factor 3 subunit B-like	1997	1	1.6E-253	85.15%	gi|1316153750|ref|XP_023221884.1|eukaryotic translation initiation factor 3 subunit B-like [Centruroides sculpturatus]	Centruroides sculpturatus			IPR013979;IPR015943;IPR011400;IPR011400;noIPR
TRINITY_DN100450_c1_g1_i2	translation initiation factor 3, subunit B, putative	840	1	1.1E-86	97.25%	gi|241834464|ref|XP_002414993.1|translation initiation factor 3, subunit B, putative [Ixodes scapularis]/gi|215509205|gb|EEC18658.1| translation initiation factor 3, subunit B, putative [Ixodes scapularis]	Ixodes scapularis/Ixodes scapularis			IPR013979;IPR011400
TRINITY_DN100452_c2_g1_i1	hypothetical protein IscW_ISCW001035	7887	1	0.0E0	62.66%	gi|241060155|ref|XP_002407989.1|hypothetical protein IscW_ISCW001035 [Ixodes scapularis]/gi|215492331|gb|EEC01972.1| hypothetical protein IscW_ISCW001035, partial [Ixodes scapularis]	Ixodes scapularis/Ixodes scapularis			IPR004012;noIPR;noIPR;noIPR;noIPR;noIPR;noIPR;noIPR;noIPR;noIPR;noIPR;noIPR;noIPR;noIPR;noIPR;noIPR;noIPR;noIPR;noIPR;IPR004012
TRINITY_DN100452_c2_g1_i2	hypothetical protein IscW_ISCW001035	7887	1	0.0E0	62.66%	gi|241060155|ref|XP_002407989.1|hypothetical protein IscW_ISCW001035 [Ixodes scapularis]/gi|215492331|gb|EEC01972.1| hypothetical protein IscW_ISCW001035, partial [Ixodes scapularis]	Ixodes scapularis/Ixodes scapularis			IPR004012;noIPR;noIPR;noIPR;noIPR;noIPR;noIPR;noIPR;noIPR;noIPR;noIPR;noIPR;noIPR;noIPR;noIPR;noIPR;noIPR;noIPR;noIPR;IPR004012
TRINITY_DN100452_c2_g1_i3	hypothetical protein IscW_ISCW001035	4538	1	0.0E0	64.48%	gi|241060155|ref|XP_002407989.1|hypothetical protein IscW_ISCW001035 [Ixodes scapularis]/gi|215492331|gb|EEC01972.1| hypothetical protein IscW_ISCW001035, partial [Ixodes scapularis]	Ixodes scapularis/Ixodes scapularis			noIPR;IPR004012;noIPR;noIPR;noIPR;noIPR;noIPR;noIPR;noIPR;noIPR;noIPR;noIPR;noIPR;noIPR;noIPR;noIPR;noIPR;noIPR;noIPR;IPR004012
TRINITY_DN100455_c4_g1_i2	hypothetical protein IscW_ISCW003644	5642	1	1.6E-181	79.83%	gi|241240066|ref|XP_002401615.1|hypothetical protein IscW_ISCW003644 [Ixodes scapularis]/gi|215496221|gb|EEC05862.1| hypothetical protein IscW_ISCW003644, partial [Ixodes scapularis]	Ixodes scapularis/Ixodes scapularis			IPR004878;noIPR;noIPR;noIPR;IPR004878;noIPR
TRINITY_DN100455_c4_g1_i3	PREDICTED: otopetrin-3-like	1292	1	1.9E-40	69.89%	gi|1078801029|ref|XP_018497724.1|PREDICTED: otopetrin-3-like [Galendromus occidentalis]	Galendromus occidentalis			IPR004878;noIPR;noIPR;noIPR;IPR004878
TRINITY_DN100455_c4_g1_i4	hypothetical protein IscW_ISCW003644	5752	1	1.7E-181	79.83%	gi|241240066|ref|XP_002401615.1|hypothetical protein IscW_ISCW003644 [Ixodes scapularis]/gi|215496221|gb|EEC05862.1| hypothetical protein IscW_ISCW003644, partial [Ixodes scapularis]	Ixodes scapularis/Ixodes scapularis			IPR004878;noIPR;noIPR;noIPR;IPR004878;noIPR
TRINITY_DN100455_c4_g1_i6	hypothetical protein IscW_ISCW003644	5752	1	1.7E-181	79.83%	gi|241240066|ref|XP_002401615.1|hypothetical protein IscW_ISCW003644 [Ixodes scapularis]/gi|215496221|gb|EEC05862.1| hypothetical protein IscW_ISCW003644, partial [Ixodes scapularis]	Ixodes scapularis/Ixodes scapularis			IPR004878;noIPR;noIPR;noIPR;IPR004878;noIPR
TRINITY_DN100457_c6_g1_i4	sodium-dependent multivitamin transporter, putative	4895	1	1.9E-69	68.73%	gi|241862862|ref|XP_002416407.1|sodium-dependent multivitamin transporter, putative [Ixodes scapularis]/gi|215510621|gb|EEC20074.1| sodium-dependent multivitamin transporter, putative [Ixodes scapularis]	Ixodes scapularis/Ixodes scapularis			IPR038377;IPR001734;noIPR;noIPR;IPR001734
TRINITY_DN100458_c2_g1_i10	cytochrome P450, putative	1169	1	9.8E-158	93.33%	gi|241557118|ref|XP_002400171.1|cytochrome P450, putative [Ixodes scapularis]/gi|215501750|gb|EEC11244.1| cytochrome P450, putative [Ixodes scapularis]	Ixodes scapularis/Ixodes scapularis			IPR023173;IPR003097;IPR008254;IPR029039;noIPR;IPR023173;noIPR;noIPR;IPR017927;IPR008254;IPR017938;IPR029039
TRINITY_DN100458_c2_g1_i2	cytochrome P450, putative	4109	1	0.0E0	92.16%	gi|241557118|ref|XP_002400171.1|cytochrome P450, putative [Ixodes scapularis]/gi|215501750|gb|EEC11244.1| cytochrome P450, putative [Ixodes scapularis]	Ixodes scapularis/Ixodes scapularis	EC:1.6.2.4	NADPH--hemoprotein reductase	IPR001709;IPR001094;IPR023173;IPR029039;IPR001433;IPR003097;IPR023208;IPR039261;IPR008254;IPR023173;noIPR;noIPR;noIPR;IPR017927;IPR008254;IPR023208;noIPR;IPR017938;IPR039261;IPR029039
TRINITY_DN100458_c2_g1_i3	cytochrome P450, putative	3021	1	0.0E0	93.12%	gi|241557118|ref|XP_002400171.1|cytochrome P450, putative [Ixodes scapularis]/gi|215501750|gb|EEC11244.1| cytochrome P450, putative [Ixodes scapularis]	Ixodes scapularis/Ixodes scapularis			IPR001094;IPR001709;IPR039261;IPR029039;IPR023173;IPR008254;noIPR;IPR003097;IPR001433;IPR023173;noIPR;noIPR;IPR008254;IPR017927;noIPR;IPR029039;IPR039261;IPR017938
TRINITY_DN100458_c2_g1_i4	cytochrome P450, putative	3547	1	0.0E0	92.16%	gi|241557118|ref|XP_002400171.1|cytochrome P450, putative [Ixodes scapularis]/gi|215501750|gb|EEC11244.1| cytochrome P450, putative [Ixodes scapularis]	Ixodes scapularis/Ixodes scapularis	EC:1.6.2.4	NADPH--hemoprotein reductase	IPR001709;IPR001094;IPR008254;noIPR;IPR023173;IPR001433;IPR023208;IPR003097;IPR039261;IPR029039;IPR023173;noIPR;noIPR;IPR008254;IPR023208;IPR017927;noIPR;IPR039261;IPR017938;IPR029039
TRINITY_DN100458_c2_g1_i6	cytochrome P450, putative	4954	1	0.0E0	92.16%	gi|241557118|ref|XP_002400171.1|cytochrome P450, putative [Ixodes scapularis]/gi|215501750|gb|EEC11244.1| cytochrome P450, putative [Ixodes scapularis]	Ixodes scapularis/Ixodes scapularis	EC:1.6.2.4	NADPH--hemoprotein reductase	IPR001709;IPR001094;IPR008254;noIPR;IPR023173;IPR001433;IPR023208;IPR003097;IPR039261;IPR029039;IPR023173;noIPR;noIPR;IPR008254;IPR023208;IPR017927;noIPR;IPR039261;IPR017938;IPR029039
TRINITY_DN100458_c2_g1_i7	cytochrome P450, putative	7099	1	0.0E0	92.16%	gi|241557118|ref|XP_002400171.1|cytochrome P450, putative [Ixodes scapularis]/gi|215501750|gb|EEC11244.1| cytochrome P450, putative [Ixodes scapularis]	Ixodes scapularis/Ixodes scapularis	EC:1.6.2.4	NADPH--hemoprotein reductase	IPR001709;IPR001094;IPR008254;IPR023208;noIPR;IPR023173;IPR001433;IPR003097;IPR039261;IPR029039;IPR023173;noIPR;noIPR;IPR008254;IPR023208;IPR017927;noIPR;IPR039261;IPR017938;IPR029039
TRINITY_DN100458_c2_g1_i8	cytochrome P450, putative	5007	1	0.0E0	92.16%	gi|241557118|ref|XP_002400171.1|cytochrome P450, putative [Ixodes scapularis]/gi|215501750|gb|EEC11244.1| cytochrome P450, putative [Ixodes scapularis]	Ixodes scapularis/Ixodes scapularis	EC:1.6.2.4	NADPH--hemoprotein reductase	IPR001709;IPR001094;IPR008254;noIPR;IPR023173;IPR001433;IPR023208;IPR003097;IPR039261;IPR029039;IPR023173;noIPR;noIPR;IPR008254;IPR023208;IPR017927;noIPR;IPR039261;IPR017938;IPR029039
TRINITY_DN100458_c2_g1_i9	cytochrome P450, putative	3989	1	0.0E0	92.16%	gi|241557118|ref|XP_002400171.1|cytochrome P450, putative [Ixodes scapularis]/gi|215501750|gb|EEC11244.1| cytochrome P450, putative [Ixodes scapularis]	Ixodes scapularis/Ixodes scapularis	EC:1.6.2.4	NADPH--hemoprotein reductase	IPR001709;IPR001094;IPR008254;IPR023208;noIPR;IPR023173;IPR001433;IPR003097;IPR039261;IPR029039;IPR023173;noIPR;noIPR;IPR008254;IPR023208;IPR017927;noIPR;IPR039261;IPR017938;IPR029039
TRINITY_DN100459_c4_g1_i1	Exportin-T, putative	4353	1	0.0E0	75.16%	gi|241647360|ref|XP_002411126.1|Exportin-T, putative [Ixodes scapularis]/gi|215503756|gb|EEC13250.1| Exportin-T, putative [Ixodes scapularis]	Ixodes scapularis/Ixodes scapularis			IPR011989;IPR013598;IPR040017;IPR016024
TRINITY_DN100459_c4_g1_i2	Exportin-T, putative	4335	1	0.0E0	75.63%	gi|241647360|ref|XP_002411126.1|Exportin-T, putative [Ixodes scapularis]/gi|215503756|gb|EEC13250.1| Exportin-T, putative [Ixodes scapularis]	Ixodes scapularis/Ixodes scapularis			IPR013598;IPR011989;IPR040017;IPR016024
[truncated: 64,357 more rows]
